# Supplementary material for: Sequence and expression levels of circular RNAs in progenitor cell types during mouse corticogenesis
Source: Life Sci Alliance. 2019 Mar 29;2(2):e201900354. doi: 10.26508/lsa.201900354 (PMC6441494; doi:10.26508/lsa.201900354)
Supplement: Supplementary file 1 [file LSA-2019-00354_Supplemental_DataS1.xlsx]

## Sheet: Expressed feature
Dori et al., Sequence and Expression Levels of Circular-RNAs in Progenitor Cell Types During Mouse Corticogenesis
List of feature with the calculated RPKM value in the 3 cell population
chr	start	end	circID	feature_size	strand	feature_type	RFPminus_RPKM	RFPplus_RPKM	GFPplus_RPKM
chr1	10064940	10065027	CiCo_mm9_circ_000001	87	+	exon	11.2668	6.6646	11.3847
chr1	10067252	10067323	CiCo_mm9_circ_000001	71	+	exon	6.25931	3.75952	8.78816
chr1	10072333	10072427	CiCo_mm9_circ_000001	94	+	exon	8.53902	6.64841	7.77058
chr1	10072333	10072427	CiCo_mm9_circ_000002	94	+	exon	8.53902	6.64841	7.77058
chr1	10073581	10073639	CiCo_mm9_circ_000002	58	+	exon	9.16618	12.2344	8.93711
chr1	10075827	10076033	CiCo_mm9_circ_000002	206	+	exon	4.3543	4.79475	1.01892
chr1	10078131	10078265	CiCo_mm9_circ_000002	134	+	exon	6.00894	5.34687	4.29643
chr1	10078962	10079041	CiCo_mm9_circ_000002	79	+	exon	6.76006	6.2032	6.59112
chr1	10080268	10080398	CiCo_mm9_circ_000002	130	+	exon	6.19242	5.16575	4.42762
chr1	10085946	10086094	CiCo_mm9_circ_000002	148	+	exon	8.46898	3.93614	2.83108
chr1	10188923	10189057	CiCo_mm9_circ_000003	134	-	exon	12.0179	8.35448	7.42111
chr1	10189809	10189985	CiCo_mm9_circ_000003	176	-	exon	11.2031	5.8623	5.06436
chr1	10194888	10194990	CiCo_mm9_circ_000003	102	-	exon	15.7516	5.69403	6.65511
chr1	10199505	10199782	CiCo_mm9_circ_000003	277	-	exon	7.13291	6.00441	3.98312
chr1	10203124	10203304	CiCo_mm9_circ_000003	180	-	exon	9.95957	6.72974	4.95244
chr1	10204205	10204352	CiCo_mm9_circ_000003	147	-	exon	5.48113	3.96273	1.42511
chr1	106875556	106875674	CiCo_mm9_circ_000004	118	+	exon	5.30201	1.13733	0
chr1	106881247	106881499	CiCo_mm9_circ_000004	252	+	exon	3.91887	0.891585	0
chr1	107600507	107600620	CiCo_mm9_circ_000005	113	+	exon	4.7439	4.74886	5.08788
chr1	107610425	107610516	CiCo_mm9_circ_000005	91	+	exon	3.91887	2.45186	6.30455
chr1	107613354	107613426	CiCo_mm9_circ_000005	72	+	exon	4.93885	3.70802	6.50083
chr1	107615351	107615492	CiCo_mm9_circ_000005	141	+	exon	4.44323	2.54165	4.8273
chr1	107616028	107616193	CiCo_mm9_circ_000005	165	+	exon	5.42976	2.71772	5.39995
chr1	107897507	107897619	CiCo_mm9_circ_000006	112	+	exon	5.58353	1.19772	1.86651
chr1	107900676	107900753	CiCo_mm9_circ_000006	77	+	exon	6.93339	2.31355	3.38006
chr1	107902591	107902663	CiCo_mm9_circ_000006	72	+	exon	3.70414	0.618003	2.88926
chr1	107908278	107908391	CiCo_mm9_circ_000006	113	+	exon	7.9065	1.97869	2.31267
chr1	107912575	107912670	CiCo_mm9_circ_000006	95	+	exon	7.51117	2.81964	1.09852
chr1	107916424	107916482	CiCo_mm9_circ_000006	58	+	exon	6.11079	3.05859	0.893711
chr1	107919776	107919841	CiCo_mm9_circ_000006	65	+	exon	4.097	3.41774	3.19569
chr1	108177939	108178136	CiCo_mm9_circ_000007	197	+	exon	20.9402	9.56968	6.12508
chr1	108183567	108183693	CiCo_mm9_circ_000007	126	+	exon	29.0984	12.7883	4.15189
chr1	108235313	108235460	CiCo_mm9_circ_000008	147	+	exon	10.9623	6.09651	7.48181
chr1	108236016	108236247	CiCo_mm9_circ_000008	231	+	exon	6.99316	6.80602	3.4092
chr1	108239953	108240156	CiCo_mm9_circ_000008	203	+	exon	10.604	9.06707	3.61865
chr1	108241436	108241497	CiCo_mm9_circ_000008	61	+	exon	10.604	9.06707	3.61865
chr1	108243661	108243757	CiCo_mm9_circ_000008	96	+	exon	21.8066	10.9147	7.6542
chr1	108247108	108247264	CiCo_mm9_circ_000008	156	+	exon	21.8066	10.9147	7.6542
chr1	108260817	108261018	CiCo_mm9_circ_000008	201	+	exon	14.8675	11.6274	7.61036
chr1	108265590	108265753	CiCo_mm9_circ_000008	163	+	exon	14.8675	11.6274	7.61036
chr1	108239953	108240156	CiCo_mm9_circ_000009	203	+	exon	13.7785	13.7929	6.04536
chr1	108241436	108241497	CiCo_mm9_circ_000009	61	+	exon	13.7785	13.7929	6.04536
chr1	108243661	108243757	CiCo_mm9_circ_000009	96	+	exon	11.6014	9.38018	5.74276
chr1	108247108	108247264	CiCo_mm9_circ_000009	156	+	exon	11.6014	9.38018	5.74276
chr1	108260817	108261018	CiCo_mm9_circ_000009	201	+	exon	11.6014	9.38018	5.74276
chr1	108265590	108265753	CiCo_mm9_circ_000009	163	+	exon	18.1367	6.32699	5.14429
chr1	108272737	108272868	CiCo_mm9_circ_000009	131	+	exon	18.1367	6.32699	5.14429
chr1	108276894	108276999	CiCo_mm9_circ_000009	105	+	exon	18.1367	6.32699	5.14429
chr1	108260817	108261018	CiCo_mm9_circ_000010	201	+	exon	16.388	8.88613	6.79085
chr1	108265590	108265753	CiCo_mm9_circ_000010	163	+	exon	16.388	8.88613	6.79085
chr1	108272737	108272868	CiCo_mm9_circ_000010	131	+	exon	14.4555	9.36333	6.9642
chr1	120316016	120316495	CiCo_mm9_circ_000011	479	+	exon	13.8957	18.5156	17.6862
chr1	120467425	120467576	CiCo_mm9_circ_000013	151	+	exon	15.4177	25.2283	33.6494
chr1	120475397	120475641	CiCo_mm9_circ_000013	244	+	exon	15.0837	26.7002	37.4483
chr1	120477849	120478040	CiCo_mm9_circ_000013	191	+	exon	14.0835	25.6117	31.3078
chr1	120763148	120763334	CiCo_mm9_circ_000016	186	-	exon	7.71201	10.3739	1.40987
chr1	120764555	120764758	CiCo_mm9_circ_000016	203	-	exon	7.71201	10.3739	1.40987
chr1	120763148	120763334	CiCo_mm9_circ_000017	186	-	exon	7.95301	15.0381	1.55085
chr1	120764555	120764758	CiCo_mm9_circ_000017	203	-	exon	7.95301	15.0381	1.55085
chr1	120786872	120786978	CiCo_mm9_circ_000017	106	-	exon	11.7932	16.8651	1.47838
chr1	121450782	121450857	CiCo_mm9_circ_000019	75	-	exon	10.6738	7.1233	2.08141
chr1	121451628	121451719	CiCo_mm9_circ_000019	91	-	exon	6.85803	5.39409	1.71942
chr1	121464372	121464437	CiCo_mm9_circ_000019	65	-	exon	8.19401	5.46839	1.59785
chr1	121466621	121466750	CiCo_mm9_circ_000019	129	-	exon	8.19401	5.46839	1.59785
chr1	121469382	121469480	CiCo_mm9_circ_000019	98	-	exon	13.1734	8.32878	3.65047
chr1	121475490	121475654	CiCo_mm9_circ_000019	164	-	exon	13.1734	8.32878	3.65047
chr1	121464372	121464437	CiCo_mm9_circ_000020	65	-	exon	14.5671	12.7596	4.26093
chr1	121466621	121466750	CiCo_mm9_circ_000020	129	-	exon	14.5671	12.7596	4.26093
chr1	121469382	121469480	CiCo_mm9_circ_000020	98	-	exon	7.64774	5.74181	3.51526
chr1	121475490	121475654	CiCo_mm9_circ_000020	164	-	exon	7.64774	5.74181	3.51526
chr1	121495581	121495697	CiCo_mm9_circ_000022	116	-	exon	6.93339	5.39828	1.35202
chr1	121496774	121496814	CiCo_mm9_circ_000022	40	-	exon	19.7855	13.2042	3.85822
chr1	121501804	121501832	CiCo_mm9_circ_000022	28	-	exon	40.4049	21.7793	0
chr1	121504563	121504670	CiCo_mm9_circ_000022	107	-	exon	12.5186	9.60765	0
chr1	121505693	121505863	CiCo_mm9_circ_000022	170	-	exon	12.5186	9.60765	0
chr1	121504563	121504670	CiCo_mm9_circ_000023	107	-	exon	7.9065	6.06799	0.308356
chr1	121505693	121505863	CiCo_mm9_circ_000023	170	-	exon	7.9065	6.06799	0.308356
chr1	121564090	121564226	CiCo_mm9_circ_000024	136	-	exon	1.97374	4.93951	9.62207
chr1	121572125	121572274	CiCo_mm9_circ_000024	149	-	exon	5.40805	7.51903	10.8973
chr1	121575331	121575460	CiCo_mm9_circ_000024	129	-	exon	8.32007	10.758	9.73458
chr1	121576625	121576772	CiCo_mm9_circ_000024	147	-	exon	3.65408	3.04826	6.76926
chr1	121579060	121579122	CiCo_mm9_circ_000024	62	-	exon	14.307	7.87708	10.0436
chr1	121579281	121579372	CiCo_mm9_circ_000024	91	-	exon	11.7566	12.7497	13.7554
chr1	121581043	121581210	CiCo_mm9_circ_000024	167	-	exon	5.36512	8.32465	12.2406
chr1	121584186	121584343	CiCo_mm9_circ_000024	157	-	exon	7.4161	7.70939	7.00828
chr1	121588177	121588234	CiCo_mm9_circ_000024	57	-	exon	9.32422	14.001	10.0003
chr1	121588322	121588406	CiCo_mm9_circ_000024	84	-	exon	4.2416	9.5536	8.06443
chr1	121589326	121589486	CiCo_mm9_circ_000024	160	-	exon	2.7992	8.12616	8.51523
chr1	121602731	121602890	CiCo_mm9_circ_000025	159	-	exon	6.76006	5.92124	9.22757
chr1	121604352	121604478	CiCo_mm9_circ_000025	126	-	exon	7.09717	7.81506	11.2101
chr1	121612523	121612592	CiCo_mm9_circ_000025	69	-	exon	7.72578	18.6902	15.8187
chr1	121618440	121618613	CiCo_mm9_circ_000025	173	-	exon	5.69813	8.81542	10.3034
chr1	121622609	121622673	CiCo_mm9_circ_000025	64	-	exon	5.69813	8.81542	10.3034
chr1	121637931	121638020	CiCo_mm9_circ_000025	89	-	exon	9.70675	5.55252	6.48972
chr1	121639928	121640016	CiCo_mm9_circ_000025	88	-	exon	9.70675	5.55252	6.48972
chr1	121661607	121661728	CiCo_mm9_circ_000025	121	-	exon	8.01192	8.52157	11.1317
chr1	121662005	121662058	CiCo_mm9_circ_000025	53	-	exon	8.01192	8.52157	11.1317
chr1	121662454	121662499	CiCo_mm9_circ_000025	45	-	exon	8.01192	8.52157	11.1317
chr1	121618440	121618613	CiCo_mm9_circ_000026	173	-	exon	7.0892	11.1518	14.8115
chr1	121622609	121622673	CiCo_mm9_circ_000026	64	-	exon	7.0892	11.1518	14.8115
chr1	121637931	121638020	CiCo_mm9_circ_000026	89	-	exon	7.0892	11.1518	14.8115
chr1	121639928	121640016	CiCo_mm9_circ_000026	88	-	exon	16.2537	12.5728	15.5594
chr1	121661607	121661728	CiCo_mm9_circ_000026	121	-	exon	16.2537	12.5728	15.5594
chr1	121662005	121662058	CiCo_mm9_circ_000026	53	-	exon	16.2537	12.5728	15.5594
chr1	121662454	121662499	CiCo_mm9_circ_000026	45	-	exon	28.3755	21.7217	32.2232
chr1	121669625	121669704	CiCo_mm9_circ_000026	79	-	exon	28.3755	21.7217	32.2232
chr1	121669805	121669848	CiCo_mm9_circ_000026	43	-	exon	28.3755	21.7217	32.2232
chr1	121637931	121638020	CiCo_mm9_circ_000027	89	-	exon	29.3916	24.5186	29.8033
chr1	121639928	121640016	CiCo_mm9_circ_000027	88	-	exon	29.3916	24.5186	29.8033
chr1	121661607	121661728	CiCo_mm9_circ_000027	121	-	exon	29.3916	24.5186	29.8033
chr1	121662005	121662058	CiCo_mm9_circ_000027	53	-	exon	6.76006	10.1507	17.1369
chr1	121662454	121662499	CiCo_mm9_circ_000027	45	-	exon	8.19401	19.4811	31.158
chr1	127299969	127300143	CiCo_mm9_circ_000031	174	-	exon	22.1472	23.4594	27.1177
chr1	127302421	127302565	CiCo_mm9_circ_000031	144	-	exon	21.1349	18.9791	24.0008
chr1	127303868	127303976	CiCo_mm9_circ_000031	108	-	exon	21.1349	18.9791	24.0008
chr1	127305096	127305192	CiCo_mm9_circ_000031	96	-	exon	15.7114	18.6251	19.8338
chr1	127314825	127314881	CiCo_mm9_circ_000031	56	-	exon	15.7114	18.6251	19.8338
chr1	127302421	127302565	CiCo_mm9_circ_000032	144	-	exon	12.0798	9.76699	11.9591
chr1	127303868	127303976	CiCo_mm9_circ_000032	108	-	exon	6.3252	1.58295	0.925069
chr1	127873502	127873639	CiCo_mm9_circ_000033	137	-	exon	3.26573	6.86521	4.20303
chr1	127877959	127878274	CiCo_mm9_circ_000033	315	-	exon	3.26573	6.86521	4.20303
chr1	127873502	127873639	CiCo_mm9_circ_000034	137	-	exon	3.13758	3.85469	4.50532
chr1	127877959	127878274	CiCo_mm9_circ_000034	315	-	exon	3.13758	3.85469	4.50532
chr1	127911147	127911226	CiCo_mm9_circ_000034	79	-	exon	3.13758	3.85469	4.50532
chr1	127877959	127878274	CiCo_mm9_circ_000035	315	-	exon	3.38003	5.07535	5.93201
chr1	12929069	12929281	CiCo_mm9_circ_000037	212	-	exon	0	2.11804	7.42661
chr1	12934060	12934193	CiCo_mm9_circ_000037	133	-	exon	1.34528	2.35671	8.65699
chr1	129688181	129688310	CiCo_mm9_circ_000038	129	+	exon	9.01341	10.758	5.6785
chr1	129689934	129689995	CiCo_mm9_circ_000038	61	+	exon	9.01341	10.758	5.6785
chr1	129691831	129691894	CiCo_mm9_circ_000038	63	+	exon	21.8066	20.3742	16.1589
chr1	129694417	129694463	CiCo_mm9_circ_000038	46	+	exon	21.8066	20.3742	16.1589
chr1	129695966	129696130	CiCo_mm9_circ_000038	164	+	exon	22.5335	20.4424	18.9495
chr1	129688181	129688310	CiCo_mm9_circ_000039	129	+	exon	22.5335	20.4424	18.9495
chr1	129689934	129689995	CiCo_mm9_circ_000039	61	+	exon	28.7662	28.7963	21.316
chr1	129691831	129691894	CiCo_mm9_circ_000039	63	+	exon	28.7662	28.7963	21.316
chr1	129694417	129694463	CiCo_mm9_circ_000039	46	+	exon	9.28654	10.3899	10.8654
chr1	129695966	129696130	CiCo_mm9_circ_000039	164	+	exon	9.28654	10.3899	10.8654
chr1	129698182	129698253	CiCo_mm9_circ_000039	71	+	exon	6.25931	11.2786	7.32347
chr1	129785732	129785865	CiCo_mm9_circ_000040	133	+	exon	9.41699	3.36673	3.935
chr1	129787594	129787673	CiCo_mm9_circ_000040	79	+	exon	9.01341	3.94749	0.659112
chr1	129830993	129831131	CiCo_mm9_circ_000042	138	+	exon	2.59379	3.89475	2.65541
chr1	129834565	129834662	CiCo_mm9_circ_000042	97	+	exon	4.59868	4.14314	3.76635
chr1	129835151	129835267	CiCo_mm9_circ_000042	116	+	exon	3.08151	4.6271	3.6054
chr1	129869523	129869721	CiCo_mm9_circ_000043	198	-	exon	6.34109	3.17386	0.26497
chr1	129872715	129873121	CiCo_mm9_circ_000043	406	-	exon	4.42919	2.43861	0
chr1	129884573	129884723	CiCo_mm9_circ_000044	150	-	exon	4.77532	3.28647	0.349198
chr1	129889376	129889556	CiCo_mm9_circ_000044	180	-	exon	4.48181	3.73875	0.58264
chr1	129893429	129893549	CiCo_mm9_circ_000044	120	-	exon	4.46946	3.72845	0.871553
chr1	129912619	129912736	CiCo_mm9_circ_000045	117	-	exon	4.58309	4.58789	0
chr1	129914134	129914306	CiCo_mm9_circ_000045	172	-	exon	3.12604	3.91164	0
chr1	129929425	129929511	CiCo_mm9_circ_000045	86	-	exon	5.18012	1.55566	0.60608
chr1	129932974	129933206	CiCo_mm9_circ_000045	232	-	exon	3.86842	2.12986	0
chr1	130048320	130048529	CiCo_mm9_circ_000046	209	+	exon	6.43815	4.08176	8.28598
chr1	130049765	130049976	CiCo_mm9_circ_000046	211	+	exon	7.65289	5.32007	7.71037
chr1	130083334	130083486	CiCo_mm9_circ_000047	152	+	exon	14.1387	12.3843	8.96048
chr1	130087214	130087316	CiCo_mm9_circ_000047	102	+	exon	5.25053	5.69403	10.2386
chr1	130090036	130090333	CiCo_mm9_circ_000047	297	+	exon	5.25053	5.69403	10.2386
chr1	130093550	130093674	CiCo_mm9_circ_000047	124	+	exon	11.1911	12.1112	10.4396
chr1	130107781	130107936	CiCo_mm9_circ_000047	155	+	exon	11.1911	12.1112	10.4396
chr1	130112977	130113129	CiCo_mm9_circ_000047	152	+	exon	11.1911	12.1112	10.4396
chr1	130118176	130118280	CiCo_mm9_circ_000047	104	+	exon	11.1911	12.1112	10.4396
chr1	130120045	130120218	CiCo_mm9_circ_000047	173	+	exon	11.1911	12.1112	10.4396
chr1	130087214	130087316	CiCo_mm9_circ_000048	102	+	exon	11.1911	12.1112	10.4396
chr1	130090036	130090333	CiCo_mm9_circ_000048	297	+	exon	15.8636	15.8802	13.0768
chr1	130093550	130093674	CiCo_mm9_circ_000048	124	+	exon	15.8636	15.8802	13.0768
chr1	130090036	130090333	CiCo_mm9_circ_000049	297	+	exon	15.8636	15.8802	13.0768
chr1	130093550	130093674	CiCo_mm9_circ_000049	124	+	exon	15.8636	15.8802	13.0768
chr1	130090036	130090333	CiCo_mm9_circ_000050	297	+	exon	15.8636	15.8802	13.0768
chr1	130093550	130093674	CiCo_mm9_circ_000050	124	+	exon	15.8636	15.8802	13.0768
chr1	130107781	130107936	CiCo_mm9_circ_000050	155	+	exon	15.6001	9.2542	9.12616
chr1	130112977	130113129	CiCo_mm9_circ_000050	152	+	exon	15.6001	9.2542	9.12616
chr1	130118176	130118280	CiCo_mm9_circ_000050	104	+	exon	15.6001	9.2542	9.12616
chr1	130090036	130090333	CiCo_mm9_circ_000051	297	+	exon	15.6001	9.2542	9.12616
chr1	130093550	130093674	CiCo_mm9_circ_000051	124	+	exon	15.6001	9.2542	9.12616
chr1	130107781	130107936	CiCo_mm9_circ_000051	155	+	exon	13.5496	8.25619	10.339
chr1	130112977	130113129	CiCo_mm9_circ_000051	152	+	exon	13.5496	8.25619	10.339
chr1	130118176	130118280	CiCo_mm9_circ_000051	104	+	exon	13.5496	8.25619	10.339
chr1	130120045	130120218	CiCo_mm9_circ_000051	173	+	exon	13.5496	8.25619	10.339
chr1	130090036	130090333	CiCo_mm9_circ_000052	297	+	exon	13.5496	8.25619	10.339
chr1	130093550	130093674	CiCo_mm9_circ_000052	124	+	exon	12.8763	9.02284	18.0785
chr1	130107781	130107936	CiCo_mm9_circ_000052	155	+	exon	12.8763	9.02284	18.0785
chr1	130112977	130113129	CiCo_mm9_circ_000052	152	+	exon	12.8763	9.02284	18.0785
chr1	130118176	130118280	CiCo_mm9_circ_000052	104	+	exon	12.8763	9.02284	18.0785
chr1	130120045	130120218	CiCo_mm9_circ_000052	173	+	exon	12.8763	9.02284	18.0785
chr1	130127899	130128044	CiCo_mm9_circ_000052	145	+	exon	7.77018	7.25976	10.0003
chr1	130131642	130131725	CiCo_mm9_circ_000052	83	+	exon	7.77018	7.25976	10.0003
chr1	130132118	130132203	CiCo_mm9_circ_000052	85	+	exon	7.77018	7.25976	10.0003
chr1	130107781	130107936	CiCo_mm9_circ_000053	155	+	exon	7.77018	7.25976	10.0003
chr1	130112977	130113129	CiCo_mm9_circ_000053	152	+	exon	8.643	13.2871	6.86199
chr1	130118176	130118280	CiCo_mm9_circ_000053	104	+	exon	10.7302	16.6493	9.41588
chr1	130120045	130120218	CiCo_mm9_circ_000053	173	+	exon	27.2498	15.2129	9.19691
chr1	130244945	130245096	CiCo_mm9_circ_000055	151	-	exon	49.8109	35.0229	1.3876
chr1	130245501	130245647	CiCo_mm9_circ_000055	146	-	exon	46.5999	35.9072	2.5109
chr1	130245880	130246046	CiCo_mm9_circ_000055	166	-	exon	39.3999	23.5026	2.84168
chr1	130248009	130248259	CiCo_mm9_circ_000055	250	-	exon	28.3689	18.1535	2.52091
chr1	130250036	130250147	CiCo_mm9_circ_000055	111	-	exon	49.0909	22.5571	3.29556
chr1	13211387	13211560	CiCo_mm9_circ_000057	173	-	exon	18.6484	11.4082	14.5459
chr1	13214689	13214794	CiCo_mm9_circ_000057	105	-	exon	18.6484	11.4082	14.5459
chr1	13211387	13211560	CiCo_mm9_circ_000058	173	-	exon	20.4077	14.4706	18.4054
chr1	13214689	13214794	CiCo_mm9_circ_000058	105	-	exon	20.4077	14.4706	18.4054
chr1	13276049	13276106	CiCo_mm9_circ_000058	57	-	exon	15.5404	17.8901	15.455
chr1	133910959	133911175	CiCo_mm9_circ_000061	216	+	exon	7.0612	4.98959	3.64486
chr1	133914169	133915039	CiCo_mm9_circ_000061	870	+	exon	5.58811	6.11191	3.75338
chr1	133915926	133916043	CiCo_mm9_circ_000061	117	+	exon	9.16618	13.7637	4.91541
chr1	134421883	134422013	CiCo_mm9_circ_000064	130	-	exon	5.50437	38.2265	322.814
chr1	134422394	134422531	CiCo_mm9_circ_000064	137	-	exon	3.26573	35.9606	309.496
chr1	134422864	134423040	CiCo_mm9_circ_000064	176	-	exon	2.03693	26.5078	262.751
chr1	134897859	134898020	CiCo_mm9_circ_000066	161	-	exon	12.7968	11.4178	6.18426
chr1	134900367	134900467	CiCo_mm9_circ_000066	100	-	exon	24.9877	12.9536	7.83103
chr1	134901230	134901298	CiCo_mm9_circ_000066	68	-	exon	19.5944	22.884	12.9912
chr1	134905713	134905769	CiCo_mm9_circ_000066	56	-	exon	31.626	17.4125	18.5014
chr1	134907641	134907775	CiCo_mm9_circ_000066	134	-	exon	16.0238	10.6937	7.42111
chr1	134909213	134909291	CiCo_mm9_circ_000066	78	-	exon	11.4094	13.1345	5.33964
chr1	134915353	134915461	CiCo_mm9_circ_000066	108	-	exon	16.5384	13.2445	9.19129
chr1	134991274	134991411	CiCo_mm9_circ_000067	137	+	exon	9.14404	13.7304	17.1942
chr1	134995207	134995377	CiCo_mm9_circ_000067	170	+	exon	7.3794	13.1913	16.0345
chr1	134995729	134995886	CiCo_mm9_circ_000067	157	+	exon	7.3794	13.1913	16.0345
chr1	134996181	134996291	CiCo_mm9_circ_000067	110	+	exon	13.6913	17.703	17.6876
chr1	134995207	134995377	CiCo_mm9_circ_000068	170	+	exon	13.6913	17.703	17.6876
chr1	134995729	134995886	CiCo_mm9_circ_000068	157	+	exon	14.6163	19.5088	25.1769
chr1	134996181	134996291	CiCo_mm9_circ_000068	110	+	exon	14.6163	19.5088	25.1769
chr1	135530338	135530437	CiCo_mm9_circ_000070	99	-	exon	19.8295	23.0082	15.2914
chr1	135532573	135532633	CiCo_mm9_circ_000070	60	-	exon	26.5969	36.9789	24.2035
chr1	135533925	135534036	CiCo_mm9_circ_000070	111	-	exon	21.7288	18.1262	16.007
chr1	135535109	135535190	CiCo_mm9_circ_000070	81	-	exon	20.8847	18.1557	13.5038
chr1	135535409	135535526	CiCo_mm9_circ_000070	117	-	exon	18.3324	13.7637	9.38397
chr1	135535616	135535820	CiCo_mm9_circ_000070	204	-	exon	16.2681	13.8644	10.803
chr1	135537188	135537312	CiCo_mm9_circ_000070	124	-	exon	17.3057	21.2939	9.70213
chr1	135542303	135542423	CiCo_mm9_circ_000070	120	-	exon	21.6024	24.2349	10.0229
chr1	135543912	135544106	CiCo_mm9_circ_000070	194	-	exon	16.1779	16.6576	10.8162
chr1	136512494	136512645	CiCo_mm9_circ_000071	151	+	exon	14.8247	24.9315	43.7095
chr1	136512765	136512880	CiCo_mm9_circ_000071	115	+	exon	25.6416	35.7802	56.3654
chr1	136516136	136516275	CiCo_mm9_circ_000072	139	+	exon	22.5335	28.6797	32.3906
chr1	136517419	136517599	CiCo_mm9_circ_000072	180	+	exon	15.9353	21.6847	29.132
chr1	136518511	136518670	CiCo_mm9_circ_000072	159	+	exon	18.5902	30.4521	36.5807
chr1	136521287	136521773	CiCo_mm9_circ_000072	486	+	exon	10.3645	17.2305	20.4636
chr1	136762354	136762537	CiCo_mm9_circ_000073	183	-	exon	5.38845	4.65853	2.8657
chr1	136769383	136769509	CiCo_mm9_circ_000073	126	-	exon	7.80689	5.68368	3.7367
chr1	136770515	136770598	CiCo_mm9_circ_000073	83	-	exon	11.8033	7.51903	3.13863
chr1	136772541	136772742	CiCo_mm9_circ_000073	201	-	exon	4.01588	3.79674	2.87138
chr1	136776209	136776322	CiCo_mm9_circ_000073	113	-	exon	3.95325	5.93608	8.78816
chr1	137302397	137302549	CiCo_mm9_circ_000075	152	-	exon	32.9903	37.4477	21.3673
chr1	137303093	137303152	CiCo_mm9_circ_000075	59	-	exon	69.1028	56.3928	31.6374
chr1	137303335	137303436	CiCo_mm9_circ_000075	101	-	exon	40.6487	37.5952	21.195
chr1	137303528	137303648	CiCo_mm9_circ_000075	120	-	exon	37.9904	36.9116	21.7888
chr1	137304564	137304651	CiCo_mm9_circ_000075	87	-	exon	39.9458	42.5509	28.7612
chr1	137428925	137429291	CiCo_mm9_circ_000076	366	-	exon	1.47358	11.4322	33.3327
chr1	137433773	137433876	CiCo_mm9_circ_000076	103	-	exon	1.73335	22.5571	56.785
chr1	138041175	138041398	CiCo_mm9_circ_000078	223	+	exon	7.24292	91.034	101.221
chr1	138041706	138041889	CiCo_mm9_circ_000078	183	+	exon	6.36817	90.4736	104.312
chr1	138045837	138046033	CiCo_mm9_circ_000079	196	+	exon	5.94794	97.0986	108.67
chr1	138047707	138047897	CiCo_mm9_circ_000079	190	+	exon	5.19097	119.99	146.592
chr1	138369961	138370049	CiCo_mm9_circ_000080	88	+	exon	9.11468	5.06901	0
chr1	138372916	138373015	CiCo_mm9_circ_000080	99	+	exon	1.80268	3.60914	0
chr1	138399886	138400016	CiCo_mm9_circ_000081	130	+	exon	5.50437	6.1989	0.402511
chr1	138406721	138406822	CiCo_mm9_circ_000081	101	+	exon	7.06934	7.96133	0.516951
chr1	138410310	138410399	CiCo_mm9_circ_000081	89	+	exon	6.00894	7.51903	0
chr1	139795175	139795362	CiCo_mm9_circ_000082	187	+	exon	13.4242	6.95911	9.81656
chr1	140395152	140395266	CiCo_mm9_circ_000084	114	-	exon	5.48642	4.31527	0
chr1	140399147	140399242	CiCo_mm9_circ_000084	95	-	exon	1.87779	4.22946	0
chr1	140440779	140440920	CiCo_mm9_circ_000085	141	-	exon	6.34747	1.90623	0.371331
chr1	140919681	140919725	CiCo_mm9_circ_000086	44	+	exon	4.00596	16.0406	1.17175
chr1	140936576	140936626	CiCo_mm9_circ_000086	50	+	exon	12.3713	27.4224	13.4407
chr1	140938500	140938620	CiCo_mm9_circ_000086	120	+	exon	12.3713	27.4224	13.4407
chr1	140936576	140936626	CiCo_mm9_circ_000087	50	+	exon	12.3713	27.4224	13.4407
chr1	140938500	140938620	CiCo_mm9_circ_000087	120	+	exon	9.68383	14.9138	12.6375
chr1	140936576	140936626	CiCo_mm9_circ_000088	50	+	exon	9.68383	14.9138	12.6375
chr1	140938500	140938620	CiCo_mm9_circ_000088	120	+	exon	9.68383	14.9138	12.6375
chr1	140949922	140949992	CiCo_mm9_circ_000088	70	+	exon	19.0424	20.3332	12.6252
chr1	140951117	140951198	CiCo_mm9_circ_000088	81	+	exon	19.0424	20.3332	12.6252
chr1	140956851	140956905	CiCo_mm9_circ_000088	54	+	exon	19.0424	20.3332	12.6252
chr1	140959437	140959548	CiCo_mm9_circ_000088	111	+	exon	32.9759	29.1592	19.2911
chr1	140949922	140949992	CiCo_mm9_circ_000089	70	+	exon	32.9759	29.1592	19.2911
chr1	140951117	140951198	CiCo_mm9_circ_000089	81	+	exon	32.9759	29.1592	19.2911
chr1	140956851	140956905	CiCo_mm9_circ_000089	54	+	exon	68.8297	49.2155	38.3483
chr1	140959437	140959548	CiCo_mm9_circ_000089	111	+	exon	68.8297	49.2155	38.3483
chr1	140949922	140949992	CiCo_mm9_circ_000090	70	+	exon	68.8297	49.2155	38.3483
chr1	140951117	140951198	CiCo_mm9_circ_000090	81	+	exon	28.9717	21.3487	19.3026
chr1	140956851	140956905	CiCo_mm9_circ_000090	54	+	exon	28.9717	21.3487	19.3026
chr1	140959437	140959548	CiCo_mm9_circ_000090	111	+	exon	28.9717	21.3487	19.3026
chr1	140977749	140977850	CiCo_mm9_circ_000090	101	+	exon	4.41834	10.1728	5.16951
chr1	140982459	140982505	CiCo_mm9_circ_000090	46	+	exon	4.41834	10.1728	5.16951
chr1	140987030	140987132	CiCo_mm9_circ_000090	102	+	exon	7.67099	17.2778	12.3408
chr1	140977749	140977850	CiCo_mm9_circ_000091	101	+	exon	7.67099	17.2778	12.3408
chr1	140982459	140982505	CiCo_mm9_circ_000091	46	+	exon	7.00071	10.95	7.67897
chr1	140987030	140987132	CiCo_mm9_circ_000091	102	+	exon	7.00071	10.95	7.67897
chr1	140998544	140998670	CiCo_mm9_circ_000091	126	+	exon	10.6458	8.88075	8.30377
chr1	141006960	141007062	CiCo_mm9_circ_000091	102	+	exon	7.87579	7.00803	6.65511
chr1	141386222	141386414	CiCo_mm9_circ_000092	192	+	exon	7.47226	6.07756	0
chr1	141386540	141386733	CiCo_mm9_circ_000092	193	+	exon	7.43374	7.44152	0.271799
chr1	141386875	141387030	CiCo_mm9_circ_000092	155	+	exon	10.4001	8.09742	0.338006
chr1	141388094	141388271	CiCo_mm9_circ_000092	177	+	exon	9.11468	8.36387	0.29623
chr1	145514754	145514819	CiCo_mm9_circ_000094	65	-	exon	27.3134	25.9748	9.58708
chr1	145517119	145517198	CiCo_mm9_circ_000094	79	-	exon	28.1669	21.4292	5.93201
chr1	145518459	145518558	CiCo_mm9_circ_000094	99	-	exon	20.7308	13.0831	5.2729
chr1	145524768	145524985	CiCo_mm9_circ_000094	217	-	exon	13.6442	8.48478	5.07939
chr1	152253591	152253684	CiCo_mm9_circ_000095	93	+	exon	25.8896	15.358	11.2189
chr1	152254458	152254539	CiCo_mm9_circ_000095	81	+	exon	27.4799	20.9066	10.9316
chr1	152254619	152254707	CiCo_mm9_circ_000095	88	+	exon	22.2803	19.7691	8.8869
chr1	153248209	153248303	CiCo_mm9_circ_000097	94	-	exon	3.79512	4.27398	1.66512
chr1	153250084	153250273	CiCo_mm9_circ_000097	189	-	exon	1.89756	3.56165	1.66512
chr1	153250924	153251026	CiCo_mm9_circ_000097	102	-	exon	2.62526	3.94202	1.53579
chr1	153252545	153252675	CiCo_mm9_circ_000097	130	-	exon	5.50437	3.44383	1.61004
chr1	153254705	153254765	CiCo_mm9_circ_000097	60	-	exon	2.95522	5.17704	5.18645
chr1	153267229	153267313	CiCo_mm9_circ_000097	84	-	exon	6.36241	4.24604	1.86102
chr1	153269163	153269250	CiCo_mm9_circ_000097	87	-	exon	4.097	3.58863	1.19839
chr1	153323269	153323485	CiCo_mm9_circ_000099	216	-	exon	19.1068	15.8004	12.3925
chr1	153324001	153324162	CiCo_mm9_circ_000099	161	-	exon	11.1277	14.2026	10.7411
chr1	153325666	153325755	CiCo_mm9_circ_000099	89	-	exon	10.0149	19.0482	6.44465
chr1	153617961	153618062	CiCo_mm9_circ_000100	101	+	exon	3.53467	6.63444	4.1356
chr1	153618539	153618579	CiCo_mm9_circ_000100	40	+	exon	8.79357	8.80277	3.85822
chr1	153622986	153623099	CiCo_mm9_circ_000100	113	+	exon	3.95325	1.97869	3.70028
chr1	153624535	153624689	CiCo_mm9_circ_000100	154	+	exon	4.07057	2.91059	3.06168
chr1	153629502	153629637	CiCo_mm9_circ_000100	135	+	exon	3.9765	2.65378	4.26484
chr1	153631868	153631974	CiCo_mm9_circ_000100	106	+	exon	4.21187	2.52977	5.42073
chr1	154396196	154396300	CiCo_mm9_circ_000102	104	-	exon	6.00894	2.1483	2.00872
chr1	154399550	154399766	CiCo_mm9_circ_000102	216	-	exon	4.98437	3.11849	1.70093
chr1	154693248	154693393	CiCo_mm9_circ_000104	145	-	exon	21.6075	16.6861	18.7802
chr1	154695863	154696146	CiCo_mm9_circ_000104	283	-	exon	10.7907	11.5963	8.54061
chr1	154697004	154697124	CiCo_mm9_circ_000104	120	-	exon	13.4084	10.4397	7.84398
chr1	154699727	154699788	CiCo_mm9_circ_000104	61	-	exon	11.6302	14.553	11.9065
chr1	154701439	154701510	CiCo_mm9_circ_000104	71	-	exon	7.51117	14.4115	12.4499
chr1	154702978	154703132	CiCo_mm9_circ_000104	154	-	exon	12.7932	13.6798	7.48411
chr1	154703578	154703741	CiCo_mm9_circ_000104	163	-	exon	12.7932	13.6798	7.48411
chr1	154702978	154703132	CiCo_mm9_circ_000105	154	-	exon	15.9383	12.9291	8.68099
chr1	154703578	154703741	CiCo_mm9_circ_000105	163	-	exon	15.9383	12.9291	8.68099
chr1	154706008	154706144	CiCo_mm9_circ_000105	136	-	exon	9.8687	8.23252	9.62207
chr1	154706481	154706632	CiCo_mm9_circ_000105	151	-	exon	8.89481	9.49773	7.63182
chr1	155316729	155316871	CiCo_mm9_circ_000106	142	-	exon	61.1399	114.521	74.4843
chr1	155318749	155318941	CiCo_mm9_circ_000106	192	-	exon	48.1027	74.3333	52.729
chr1	155319355	155319433	CiCo_mm9_circ_000106	78	-	exon	68.4563	82.2335	67.413
chr1	155319530	155319692	CiCo_mm9_circ_000106	162	-	exon	60.2737	69.7471	52.4055
chr1	155319801	155319891	CiCo_mm9_circ_000106	90	-	exon	75.2768	110.059	65.4766
chr1	155320276	155320413	CiCo_mm9_circ_000106	137	-	exon	65.9677	101.67	64.5739
chr1	155322792	155322839	CiCo_mm9_circ_000106	47	-	exon	125.812	184.216	126.33
chr1	155325170	155325319	CiCo_mm9_circ_000106	149	-	exon	57.0849	88.4238	57.6503
chr1	155329871	155330012	CiCo_mm9_circ_000107	141	-	exon	73.6307	90.8638	62.0122
chr1	155330869	155331002	CiCo_mm9_circ_000107	133	-	exon	63.2284	92.2485	60.9924
chr1	157021115	157021285	CiCo_mm9_circ_000109	170	+	exon	25.3008	25.8549	33.6109
chr1	157024983	157025078	CiCo_mm9_circ_000109	95	+	exon	48.8226	34.3056	56.5738
chr1	157034907	157034970	CiCo_mm9_circ_000109	63	+	exon	49.2921	50.0486	74.1501
chr1	157038558	157038684	CiCo_mm9_circ_000109	126	+	exon	44.7122	45.1142	47.7467
chr1	157040348	157040455	CiCo_mm9_circ_000109	107	+	exon	44.2325	46.7851	43.9408
chr1	157044470	157044565	CiCo_mm9_circ_000109	95	+	exon	31.9225	29.1363	34.6034
chr1	157448583	157448666	CiCo_mm9_circ_000110	83	+	exon	9.65722	3.75952	6.90498
chr1	157462996	157463102	CiCo_mm9_circ_000110	106	+	exon	8.42375	3.79465	4.92794
chr1	157471998	157472088	CiCo_mm9_circ_000110	90	+	exon	9.90485	8.92369	6.95327
chr1	157805690	157805850	CiCo_mm9_circ_000111	160	-	exon	11.7566	7.00531	2.62007
chr1	157806849	157806961	CiCo_mm9_circ_000111	112	-	exon	10.3694	7.18633	4.66628
chr1	157809604	157809690	CiCo_mm9_circ_000111	86	-	exon	8.28819	8.81542	7.27296
chr1	158799571	158799698	CiCo_mm9_circ_000115	127	-	exon	9.15424	15.1556	18.9495
chr1	158814663	158814756	CiCo_mm9_circ_000115	93	-	exon	9.15424	15.1556	18.9495
chr1	158817221	158817311	CiCo_mm9_circ_000115	90	-	exon	12.4654	17.7577	26.9254
chr1	158818077	158818161	CiCo_mm9_circ_000115	84	-	exon	12.4654	17.7577	26.9254
chr1	158830716	158830767	CiCo_mm9_circ_000115	51	-	exon	10.8953	13.8813	28.972
chr1	158831916	158832021	CiCo_mm9_circ_000115	105	-	exon	10.8953	13.8813	28.972
chr1	158799571	158799698	CiCo_mm9_circ_000116	127	-	exon	11.6644	12.2074	24.8136
chr1	158814663	158814756	CiCo_mm9_circ_000116	93	-	exon	11.6644	12.2074	24.8136
chr1	158817221	158817311	CiCo_mm9_circ_000116	90	-	exon	17.3335	19.9544	40.5607
chr1	158818077	158818161	CiCo_mm9_circ_000116	84	-	exon	17.3335	19.9544	40.5607
chr1	158830716	158830767	CiCo_mm9_circ_000116	51	-	exon	14.4555	15.3218	26.3645
chr1	158831916	158832021	CiCo_mm9_circ_000116	105	-	exon	14.4555	15.3218	26.3645
chr1	158837769	158837909	CiCo_mm9_circ_000116	140	-	exon	12.1457	13.7582	15.7065
chr1	159104273	159104418	CiCo_mm9_circ_000118	145	-	exon	12.3471	10.506	8.30662
chr1	159105793	159106348	CiCo_mm9_circ_000118	555	-	exon	6.64658	5.76099	4.36247
chr1	159107776	159107875	CiCo_mm9_circ_000118	99	-	exon	17.1255	12.1808	6.85476
chr1	159109229	159109383	CiCo_mm9_circ_000118	154	-	exon	15.1193	6.98543	3.06168
chr1	159216861	159216985	CiCo_mm9_circ_000119	124	-	exon	20.9111	11.1883	3.79648
chr1	159229267	159229395	CiCo_mm9_circ_000119	128	-	exon	18.8653	11.8906	3.67876
chr1	160196592	160196801	CiCo_mm9_circ_000120	209	-	exon	0	1.07415	8.28598
chr1	160197960	160198151	CiCo_mm9_circ_000120	191	-	exon	0.469448	1.17485	10.7106
chr1	160225556	160225901	CiCo_mm9_circ_000120	345	-	exon	0.521006	1.43427	9.44854
chr1	160402505	160402693	CiCo_mm9_circ_000121	188	+	exon	23.3681	19.8121	18.6923
chr1	160503082	160503157	CiCo_mm9_circ_000122	75	+	exon	17.7896	21.3699	24.2831
chr1	160509711	160509849	CiCo_mm9_circ_000122	138	+	exon	20.7503	18.8246	22.7607
chr1	160510341	160510492	CiCo_mm9_circ_000122	151	+	exon	20.7503	18.8246	22.7607
chr1	160509711	160509849	CiCo_mm9_circ_000123	138	+	exon	17.7896	11.5754	17.3451
chr1	160510341	160510492	CiCo_mm9_circ_000123	151	+	exon	17.7896	11.5754	17.3451
chr1	160527287	160527454	CiCo_mm9_circ_000123	167	+	exon	12.8763	12.8898	12.8684
chr1	160530445	160530640	CiCo_mm9_circ_000123	195	+	exon	12.8763	12.8898	12.8684
chr1	160532067	160532195	CiCo_mm9_circ_000123	128	+	exon	13.796	15.882	17.7557
chr1	160527287	160527454	CiCo_mm9_circ_000124	167	+	exon	13.796	15.882	17.7557
chr1	160530445	160530640	CiCo_mm9_circ_000124	195	+	exon	14.673	15.3878	19.6201
chr1	160532067	160532195	CiCo_mm9_circ_000124	128	+	exon	14.673	15.3878	19.6201
chr1	160539381	160539486	CiCo_mm9_circ_000124	105	+	exon	11.9045	11.4914	18.4054
chr1	160542476	160542665	CiCo_mm9_circ_000124	189	+	exon	5.21829	12.5845	12.4884
chr1	162156615	162156813	CiCo_mm9_circ_000127	198	-	exon	1.35881	3.40057	10.3338
chr1	162161926	162161998	CiCo_mm9_circ_000127	72	-	exon	3.70414	3.70802	15.8909
chr1	162630842	162631009	CiCo_mm9_circ_000128	167	-	exon	11.8033	2.68537	3.76635
chr1	162632488	162632591	CiCo_mm9_circ_000128	103	-	exon	14.7335	2.60274	4.56308
chr1	162665678	162665889	CiCo_mm9_circ_000129	211	-	exon	3.82645	2.97924	1.24361
chr1	162669026	162669219	CiCo_mm9_circ_000129	193	-	exon	3.25226	5.11604	4.34878
chr1	162670882	162670930	CiCo_mm9_circ_000129	48	-	exon	11.0368	11.0484	13.9893
chr1	162671014	162671062	CiCo_mm9_circ_000129	48	-	exon	5.51841	16.5726	9.68491
chr1	162872658	162872859	CiCo_mm9_circ_000130	201	+	exon	2.23104	6.47679	4.43759
chr1	162876664	162876797	CiCo_mm9_circ_000130	133	+	exon	3.36321	4.71342	3.148
chr1	162878437	162878556	CiCo_mm9_circ_000130	119	+	exon	4.5067	4.88737	4.39408
chr1	162880352	162880465	CiCo_mm9_circ_000130	113	+	exon	7.9065	8.70625	4.62535
chr1	162880971	162881253	CiCo_mm9_circ_000130	282	+	exon	6.3699	6.53598	4.28539
chr1	162881745	162881960	CiCo_mm9_circ_000130	215	+	exon	7.09389	6.057	6.347
chr1	162884914	162885282	CiCo_mm9_circ_000130	368	+	exon	5.61811	5.74625	4.85849
chr1	162965882	162965935	CiCo_mm9_circ_000131	53	+	exon	71.7734	103.596	51.7525
chr1	162966113	162966145	CiCo_mm9_circ_000131	32	+	exon	166.612	194.128	99.0665
chr1	162966338	162966375	CiCo_mm9_circ_000132	37	+	exon	213.475	172.146	84.6438
chr1	162966679	162966710	CiCo_mm9_circ_000132	31	+	exon	107.034	100.097	52.729
chr1	162992912	162993008	CiCo_mm9_circ_000133	96	-	exon	4.64609	6.51133	1.08719
chr1	162993377	162993479	CiCo_mm9_circ_000133	102	-	exon	6.12562	6.57003	2.55966
chr1	163783845	163783969	CiCo_mm9_circ_000134	124	-	exon	11.5372	7.9401	5.06198
chr1	163786951	163787102	CiCo_mm9_circ_000134	151	-	exon	10.0808	6.23288	3.81591
chr1	163787474	163787612	CiCo_mm9_circ_000134	138	-	exon	10.0808	6.23288	3.81591
chr1	163789480	163789635	CiCo_mm9_circ_000134	155	-	exon	9.7267	8.43863	3.03476
chr1	163786951	163787102	CiCo_mm9_circ_000135	151	-	exon	9.7267	8.43863	3.03476
chr1	163787474	163787612	CiCo_mm9_circ_000135	138	-	exon	9.7267	8.43863	3.03476
chr1	163789480	163789635	CiCo_mm9_circ_000135	155	-	exon	12.1334	8.38662	5.07009
chr1	163787474	163787612	CiCo_mm9_circ_000136	138	-	exon	12.1334	8.38662	5.07009
chr1	163789480	163789635	CiCo_mm9_circ_000136	155	-	exon	12.1334	8.38662	5.07009
chr1	163792322	163792433	CiCo_mm9_circ_000136	111	-	exon	12.0715	8.45891	5.64953
chr1	16379901	16380114	CiCo_mm9_circ_000137	213	-	exon	5.05425	3.37302	9.60948
chr1	16382597	16382705	CiCo_mm9_circ_000137	108	-	exon	6.61535	7.86394	9.67504
chr1	16384131	16384291	CiCo_mm9_circ_000137	160	-	exon	4.47871	6.7251	7.86022
chr1	164283650	164283854	CiCo_mm9_circ_000138	204	-	exon	0	0	3.601
chr1	164285490	164285640	CiCo_mm9_circ_000138	150	-	exon	0	0.29877	3.84118
chr1	16430403	16430539	CiCo_mm9_circ_000139	136	-	exon	11.1845	11.1962	16.9348
chr1	16453115	16453275	CiCo_mm9_circ_000139	160	-	exon	11.1845	11.1962	16.9348
chr1	16430403	16430539	CiCo_mm9_circ_000140	136	-	exon	11.1845	11.1962	16.9348
chr1	16453115	16453275	CiCo_mm9_circ_000140	160	-	exon	17.355	12.0491	17.6855
chr1	16476100	16476231	CiCo_mm9_circ_000140	131	-	exon	17.355	12.0491	17.6855
chr1	16430403	16430539	CiCo_mm9_circ_000141	136	-	exon	17.355	12.0491	17.6855
chr1	16453115	16453275	CiCo_mm9_circ_000141	160	-	exon	17.355	12.0491	17.6855
chr1	16499422	16499489	CiCo_mm9_circ_000141	67	-	exon	12.9738	4.10129	9.98654
chr1	16453115	16453275	CiCo_mm9_circ_000142	160	-	exon	12.9738	4.10129	9.98654
chr1	16476100	16476231	CiCo_mm9_circ_000142	131	-	exon	21.208	10.6151	9.30511
chr1	165184107	165184179	CiCo_mm9_circ_000143	72	-	exon	4.93885	1.85401	0
chr1	165187891	165188073	CiCo_mm9_circ_000143	182	-	exon	5.91043	2.71178	0
chr1	165191970	165192146	CiCo_mm9_circ_000143	176	-	exon	7.12925	3.56836	0
chr1	16572007	16572083	CiCo_mm9_circ_000144	76	-	exon	12.8763	10.5462	15.0654
chr1	16575356	16575512	CiCo_mm9_circ_000144	156	-	exon	8.92417	9.82686	16.7062
chr1	16588031	16588134	CiCo_mm9_circ_000144	103	-	exon	5.00745	5.37074	12.136
chr1	16592342	16592434	CiCo_mm9_circ_000144	92	-	exon	6.30939	6.76713	20.037
chr1	165744499	165744599	CiCo_mm9_circ_000145	100	+	exon	5.16692	4.88498	6.71706
chr1	165745955	165746080	CiCo_mm9_circ_000145	125	+	exon	7.51117	4.76206	14.6469
chr1	165747963	165748062	CiCo_mm9_circ_000145	99	+	exon	8.79357	4.1263	11.5746
chr1	165755818	165755997	CiCo_mm9_circ_000145	179	+	exon	7.21073	7.66942	23.728
chr1	165759263	165759426	CiCo_mm9_circ_000145	163	+	exon	10.3602	5.7041	18.7885
chr1	165795569	165795668	CiCo_mm9_circ_000147	99	+	exon	7.07859	4.724	12.147
chr1	165798831	165798917	CiCo_mm9_circ_000147	86	+	exon	7.07859	4.724	12.147
chr1	165813513	165813703	CiCo_mm9_circ_000147	190	+	exon	7.13933	5.80678	17.7503
chr1	165813513	165813703	CiCo_mm9_circ_000148	190	+	exon	6.93339	6.50686	5.07009
chr1	165818336	165818436	CiCo_mm9_circ_000148	100	+	exon	2.90755	8.24668	6.23676
chr1	167157635	167157735	CiCo_mm9_circ_000149	100	-	exon	6.24692	8.48683	10.9634
chr1	167158398	167158578	CiCo_mm9_circ_000149	180	-	exon	7.96765	10.4685	8.73961
chr1	167236308	167236723	CiCo_mm9_circ_000150	415	+	exon	5.41671	9.43494	14.7033
chr1	167240399	167241124	CiCo_mm9_circ_000150	725	+	exon	4.59361	9.81824	13.0733
chr1	167531880	167531986	CiCo_mm9_circ_000153	106	-	exon	10.1085	3.79465	0.492794
chr1	167534740	167534873	CiCo_mm9_circ_000153	133	-	exon	26.2331	21.2104	21.249
chr1	167535739	167535953	CiCo_mm9_circ_000153	214	-	exon	26.2331	21.2104	21.249
chr1	167538568	167538735	CiCo_mm9_circ_000153	167	-	exon	20.9614	17.626	21.3368
chr1	167534740	167534873	CiCo_mm9_circ_000154	133	-	exon	20.9614	17.626	21.3368
chr1	167535739	167535953	CiCo_mm9_circ_000154	214	-	exon	27.8986	17.992	19.7734
chr1	167538568	167538735	CiCo_mm9_circ_000154	167	-	exon	27.8986	17.992	19.7734
chr1	167810260	167810606	CiCo_mm9_circ_000156	346	-	exon	11.4291	7.41069	3.95087
chr1	167821940	167822046	CiCo_mm9_circ_000156	106	-	exon	16.0051	10.5407	4.92794
chr1	167841418	167841607	CiCo_mm9_circ_000157	189	-	exon	14.7061	9.02284	4.71785
chr1	167843357	167843480	CiCo_mm9_circ_000157	123	-	exon	16.7184	10.1871	8.9299
chr1	168312257	168312349	CiCo_mm9_circ_000158	92	+	exon	21.322	17.9487	26.081
chr1	168312527	168312593	CiCo_mm9_circ_000158	66	+	exon	20.1793	13.4669	22.823
chr1	168316796	168316894	CiCo_mm9_circ_000158	98	+	exon	9.10445	8.65828	5.32616
chr1	168318692	168318902	CiCo_mm9_circ_000158	210	+	exon	5.98046	9.83532	5.74771
chr1	169160023	169160121	CiCo_mm9_circ_000159	98	-	exon	17.2985	19.5951	15.4459
chr1	169164822	169164965	CiCo_mm9_circ_000159	143	-	exon	25.6632	27.8831	18.6748
chr1	169166733	169166830	CiCo_mm9_circ_000159	97	-	exon	25.6632	27.8831	18.6748
chr1	169167619	169167779	CiCo_mm9_circ_000159	160	-	exon	39.5486	36.3676	28.5167
chr1	169164822	169164965	CiCo_mm9_circ_000160	143	-	exon	39.5486	36.3676	28.5167
chr1	169166733	169166830	CiCo_mm9_circ_000160	97	-	exon	26.8723	19.8951	22.9256
chr1	169167619	169167779	CiCo_mm9_circ_000160	160	-	exon	26.8723	19.8951	22.9256
chr1	169762947	169763025	CiCo_mm9_circ_000161	78	+	exon	4.56375	1.14213	0
chr1	16987544	16987640	CiCo_mm9_circ_000162	96	-	exon	8.36296	2.32547	1.08719
chr1	170133477	170133668	CiCo_mm9_circ_000164	191	-	exon	39.4337	28.6663	33.5049
chr1	170139481	170139726	CiCo_mm9_circ_000164	245	-	exon	30.4111	33.3772	33.2235
chr1	172717476	172717591	CiCo_mm9_circ_000169	115	-	exon	6.21614	4.27807	4.09104
chr1	172718738	172718806	CiCo_mm9_circ_000169	68	-	exon	6.53146	5.23063	5.34931
chr1	172724087	172724187	CiCo_mm9_circ_000169	100	-	exon	3.56967	3.5734	2.61034
chr1	172724787	172724901	CiCo_mm9_circ_000169	114	-	exon	1.56755	3.53068	1.83405
chr1	172729744	172729876	CiCo_mm9_circ_000169	132	-	exon	3.3885	5.76648	2.77521
chr1	172745553	172745645	CiCo_mm9_circ_000169	92	-	exon	6.78429	8.24668	1.70093
chr1	172749377	172749563	CiCo_mm9_circ_000169	186	-	exon	4.82	6.27256	0.563946
chr1	172779247	172779348	CiCo_mm9_circ_000170	101	-	exon	1.76734	5.74985	6.20341
chr1	172785243	172785320	CiCo_mm9_circ_000170	77	-	exon	2.31113	10.411	4.73209
chr1	173066123	173066287	CiCo_mm9_circ_000171	164	-	exon	22.397	23.5141	12.4632
chr1	173068824	173068886	CiCo_mm9_circ_000171	62	-	exon	44.3517	31.5083	21.7612
chr1	173210270	173210386	CiCo_mm9_circ_000172	116	-	exon	12.326	9.2542	8.11215
chr1	173210518	173210653	CiCo_mm9_circ_000172	135	-	exon	9.27851	11.6103	6.59112
chr1	174104073	174104214	CiCo_mm9_circ_000174	141	+	exon	34.2763	33.0414	15.5959
chr1	174105613	174105708	CiCo_mm9_circ_000174	95	+	exon	41.3115	42.7645	20.3226
chr1	174110037	174110148	CiCo_mm9_circ_000174	111	+	exon	39.4337	41.0862	20.2442
chr1	174116426	174116499	CiCo_mm9_circ_000174	73	+	exon	51.1572	51.2107	25.6519
chr1	174116985	174117043	CiCo_mm9_circ_000174	58	+	exon	50.414	51.2314	24.1302
chr1	174117483	174117591	CiCo_mm9_circ_000174	108	+	exon	28.1152	34.353	15.4801
chr1	174129241	174129397	CiCo_mm9_circ_000175	156	-	exon	228.493	75.8608	32.2419
chr1	174220383	174220518	CiCo_mm9_circ_000176	135	-	exon	28.4983	9.61994	0
chr1	174220741	174220855	CiCo_mm9_circ_000176	114	-	exon	30.5672	8.23825	0
chr1	174221323	174221527	CiCo_mm9_circ_000176	204	-	exon	13.63	7.48236	0
chr1	174414411	174414677	CiCo_mm9_circ_000178	266	+	exon	25.3186	44.1004	27.2532
chr1	174414912	174415101	CiCo_mm9_circ_000178	189	+	exon	23.7195	44.6393	26.087
chr1	176467175	176467342	CiCo_mm9_circ_000179	167	+	exon	5.90164	7.51903	4.70794
chr1	176512046	176512194	CiCo_mm9_circ_000179	148	+	exon	4.23449	5.14726	3.89274
chr1	176624317	176624409	CiCo_mm9_circ_000180	92	+	exon	3.87674	5.33609	5.66978
chr1	176624562	176624692	CiCo_mm9_circ_000180	130	+	exon	4.12828	4.47698	4.42762
chr1	176625716	176625863	CiCo_mm9_circ_000180	147	+	exon	2.43606	4.57239	4.98787
chr1	177826258	177826484	CiCo_mm9_circ_000181	226	+	exon	5.55893	4.57104	0
chr1	177829519	177829763	CiCo_mm9_circ_000181	244	+	exon	6.98999	3.68279	0.21522
chr1	178756329	178756415	CiCo_mm9_circ_000183	86	+	exon	3.10807	4.14843	2.42432
chr1	178759000	178759114	CiCo_mm9_circ_000183	114	+	exon	3.10807	4.14843	2.42432
chr1	178774954	178775019	CiCo_mm9_circ_000183	65	+	exon	1.56755	3.53068	2.29256
chr1	178775311	178775500	CiCo_mm9_circ_000183	189	+	exon	1.56755	3.53068	2.29256
chr1	178756329	178756415	CiCo_mm9_circ_000184	86	+	exon	4.097	5.46839	0.798924
chr1	178759000	178759114	CiCo_mm9_circ_000184	114	+	exon	4.097	5.46839	0.798924
chr1	178774954	178775019	CiCo_mm9_circ_000184	65	+	exon	4.26951	2.61188	1.66512
chr1	178775311	178775500	CiCo_mm9_circ_000184	189	+	exon	4.26951	2.61188	1.66512
chr1	178783894	178784033	CiCo_mm9_circ_000184	139	+	exon	1.28763	4.18918	3.01308
chr1	178804694	178804829	CiCo_mm9_circ_000184	135	+	exon	3.31375	2.32205	4.26484
chr1	178878411	178878520	CiCo_mm9_circ_000185	109	+	exon	1.6388	2.8709	4.31419
chr1	178961780	178961883	CiCo_mm9_circ_000186	103	-	exon	9.53341	19.5206	23.3224
chr1	178973905	178973993	CiCo_mm9_circ_000186	88	-	exon	16.2039	23.8244	31.9928
chr1	178980168	178980383	CiCo_mm9_circ_000186	215	-	exon	16.2039	23.8244	31.9928
chr1	178989464	178989593	CiCo_mm9_circ_000186	129	-	exon	16.2039	23.8244	31.9928
chr1	178997341	178997464	CiCo_mm9_circ_000186	123	-	exon	12.1013	15.6647	27.8292
chr1	178973905	178973993	CiCo_mm9_circ_000187	88	-	exon	12.1013	15.6647	27.8292
chr1	178980168	178980383	CiCo_mm9_circ_000187	215	-	exon	12.1013	15.6647	27.8292
chr1	178973905	178973993	CiCo_mm9_circ_000188	88	-	exon	12.1013	15.6647	27.8292
chr1	178980168	178980383	CiCo_mm9_circ_000188	215	-	exon	14.5601	27.0685	44.2112
chr1	178989464	178989593	CiCo_mm9_circ_000188	129	-	exon	14.5601	27.0685	44.2112
chr1	178997341	178997464	CiCo_mm9_circ_000188	123	-	exon	14.5601	27.0685	44.2112
chr1	178980168	178980383	CiCo_mm9_circ_000189	215	-	exon	14.5601	27.0685	44.2112
chr1	178989464	178989593	CiCo_mm9_circ_000189	129	-	exon	14.5601	27.0685	44.2112
chr1	178997341	178997464	CiCo_mm9_circ_000189	123	-	exon	14.5601	27.0685	44.2112
chr1	178989464	178989593	CiCo_mm9_circ_000190	129	-	exon	18.1722	30.5612	51.8785
chr1	178997341	178997464	CiCo_mm9_circ_000190	123	-	exon	18.1722	30.5612	51.8785
chr1	178989464	178989593	CiCo_mm9_circ_000191	129	-	exon	18.1722	30.5612	51.8785
chr1	178997341	178997464	CiCo_mm9_circ_000191	123	-	exon	18.1722	30.5612	51.8785
chr1	179008904	179008973	CiCo_mm9_circ_000191	69	-	exon	18.1722	30.5612	51.8785
chr1	179010331	179010397	CiCo_mm9_circ_000191	66	-	exon	18.1722	30.5612	51.8785
chr1	179027097	179027229	CiCo_mm9_circ_000191	132	-	exon	21.8897	45.1142	81.3532
chr1	178989464	178989593	CiCo_mm9_circ_000192	129	-	exon	21.8897	45.1142	81.3532
chr1	178997341	178997464	CiCo_mm9_circ_000192	123	-	exon	28.251	46.4609	89.7179
chr1	179008904	179008973	CiCo_mm9_circ_000192	69	-	exon	28.251	46.4609	89.7179
chr1	179010331	179010397	CiCo_mm9_circ_000192	66	-	exon	18.2979	29.1716	52.3325
chr1	179027097	179027229	CiCo_mm9_circ_000192	132	-	exon	18.2979	29.1716	52.3325
chr1	179033092	179033237	CiCo_mm9_circ_000192	145	-	exon	18.2979	29.1716	52.3325
chr1	179039757	179039869	CiCo_mm9_circ_000192	112	-	exon	18.2979	29.1716	52.3325
chr1	179061101	179061227	CiCo_mm9_circ_000192	126	-	exon	17.286	38.6252	71.148
chr1	179027097	179027229	CiCo_mm9_circ_000193	132	-	exon	17.286	38.6252	71.148
chr1	179033092	179033237	CiCo_mm9_circ_000193	145	-	exon	17.286	38.6252	71.148
chr1	179039757	179039869	CiCo_mm9_circ_000193	112	-	exon	17.286	38.6252	71.148
chr1	179027097	179027229	CiCo_mm9_circ_000194	132	-	exon	27.9176	50.3043	83.0598
chr1	179033092	179033237	CiCo_mm9_circ_000194	145	-	exon	27.9176	50.3043	83.0598
chr1	179039757	179039869	CiCo_mm9_circ_000194	112	-	exon	27.9176	50.3043	83.0598
chr1	179061101	179061227	CiCo_mm9_circ_000194	126	-	exon	27.9176	50.3043	83.0598
chr1	179033092	179033237	CiCo_mm9_circ_000195	145	-	exon	24.8401	51.1531	74.7339
chr1	179039757	179039869	CiCo_mm9_circ_000195	112	-	exon	24.8401	51.1531	74.7339
chr1	179061101	179061227	CiCo_mm9_circ_000195	126	-	exon	24.8401	51.1531	74.7339
chr1	179178806	179179012	CiCo_mm9_circ_000197	206	-	exon	26.5613	25.2814	40.2472
chr1	180266012	180266086	CiCo_mm9_circ_000200	74	-	exon	212.716	220.157	113.895
chr1	180266177	180266289	CiCo_mm9_circ_000200	112	-	exon	191.435	229.563	99.8584
chr1	180608956	180609490	CiCo_mm9_circ_000202	534	+	exon	1.17932	15.1786	1.57694
chr1	180608956	180609490	CiCo_mm9_circ_000203	534	+	exon	1.17932	15.1786	1.57694
chr1	180645933	180646100	CiCo_mm9_circ_000203	167	+	exon	0	15.3066	0.941588
chr1	180980421	180980509	CiCo_mm9_circ_000204	88	-	exon	1.01274	5.06901	2.36984
chr1	181710986	181711091	CiCo_mm9_circ_000205	105	-	exon	7.65289	8.93772	4.97443
chr1	181711773	181711914	CiCo_mm9_circ_000205	141	-	exon	8.25171	8.89576	3.71331
chr1	181713077	181713167	CiCo_mm9_circ_000205	90	-	exon	12.8763	7.43641	6.37383
chr1	181714220	181714311	CiCo_mm9_circ_000205	91	-	exon	16.6552	6.86521	8.02397
chr1	181715138	181715267	CiCo_mm9_circ_000205	129	-	exon	16.6552	6.86521	8.02397
chr1	181716200	181716262	CiCo_mm9_circ_000205	62	-	exon	9.01341	5.55252	6.48972
chr1	181714220	181714311	CiCo_mm9_circ_000206	91	-	exon	9.01341	5.55252	6.48972
chr1	181715138	181715267	CiCo_mm9_circ_000206	129	-	exon	5.7228	4.29659	8.36968
chr1	181716200	181716262	CiCo_mm9_circ_000206	62	-	exon	5.7228	4.29659	8.36968
chr1	181722476	181722684	CiCo_mm9_circ_000207	208	-	exon	11.2129	5.61229	4.54125
chr1	181723773	181723954	CiCo_mm9_circ_000207	181	-	exon	13.8668	6.94065	6.95327
chr1	181961635	181961719	CiCo_mm9_circ_000208	84	+	exon	12.7248	8.49209	6.82375
chr1	181966959	181967055	CiCo_mm9_circ_000208	96	+	exon	10.2214	10.2321	4.34878
chr1	181970182	181970331	CiCo_mm9_circ_000208	149	+	exon	4.20626	6.91751	5.62442
chr1	182039284	182039409	CiCo_mm9_circ_000209	125	+	exon	6.43815	6.08684	10.8806
chr1	182041394	182041500	CiCo_mm9_circ_000209	106	+	exon	6.43815	6.08684	10.8806
chr1	182041875	182042024	CiCo_mm9_circ_000209	149	+	exon	7.58137	5.90279	10.8415
chr1	182039284	182039409	CiCo_mm9_circ_000210	125	+	exon	7.58137	5.90279	10.8415
chr1	182041394	182041500	CiCo_mm9_circ_000210	106	+	exon	6.60983	7.21827	6.679
chr1	182041875	182042024	CiCo_mm9_circ_000210	149	+	exon	6.60983	7.21827	6.679
chr1	182044153	182044245	CiCo_mm9_circ_000210	92	+	exon	3.87674	10.6722	9.63863
chr1	182519528	182519724	CiCo_mm9_circ_000211	196	+	exon	43.9232	54.7325	29.4426
chr1	182663296	182663438	CiCo_mm9_circ_000212	142	+	exon	3.15154	6.62516	8.48088
chr1	182664507	182664648	CiCo_mm9_circ_000212	141	+	exon	3.15154	6.62516	8.48088
chr1	182666822	182666981	CiCo_mm9_circ_000212	159	+	exon	6.34747	11.7551	8.54061
chr1	182663296	182663438	CiCo_mm9_circ_000213	142	+	exon	6.34747	11.7551	8.54061
chr1	182664507	182664648	CiCo_mm9_circ_000213	141	+	exon	9.01341	14.3802	8.56845
chr1	182666822	182666981	CiCo_mm9_circ_000213	159	+	exon	9.01341	14.3802	8.56845
chr1	182668593	182668768	CiCo_mm9_circ_000213	175	+	exon	9.01341	14.3802	8.56845
chr1	182666822	182666981	CiCo_mm9_circ_000214	159	+	exon	7.16976	9.9969	7.19031
chr1	182668593	182668768	CiCo_mm9_circ_000214	175	+	exon	7.16976	9.9969	7.19031
chr1	183111434	183111620	CiCo_mm9_circ_000215	186	-	exon	22.654	17.8527	14.6626
chr1	183112899	183113029	CiCo_mm9_circ_000215	130	-	exon	26.1458	19.9742	14.8929
chr1	183113857	183113936	CiCo_mm9_circ_000215	79	-	exon	15.7735	18.6096	13.1822
chr1	183114381	183114527	CiCo_mm9_circ_000215	146	-	exon	36.7894	33.452	28.3373
chr1	183116078	183116198	CiCo_mm9_circ_000215	120	-	exon	49.1641	38.7758	40.0914
chr1	183117736	183117877	CiCo_mm9_circ_000216	141	-	exon	29.8331	23.1925	22.6512
chr1	183121891	183122030	CiCo_mm9_circ_000216	139	-	exon	22.5335	14.8232	14.6888
chr1	183127705	183127862	CiCo_mm9_circ_000216	157	-	exon	27.953	18.2741	14.684
chr1	183128977	183129075	CiCo_mm9_circ_000216	98	-	exon	27.953	18.2741	14.684
chr1	183127705	183127862	CiCo_mm9_circ_000218	157	-	exon	48.2536	41.9243	20.772
chr1	183128977	183129075	CiCo_mm9_circ_000218	98	-	exon	48.2536	41.9243	20.772
chr1	183133154	183133291	CiCo_mm9_circ_000218	137	-	exon	29.3916	24.8455	14.1375
chr1	183748970	183749139	CiCo_mm9_circ_000219	169	-	exon	19.0872	15.6573	1.55085
chr1	183749994	183750120	CiCo_mm9_circ_000219	126	-	exon	12.0652	13.854	1.66075
chr1	183750804	183750908	CiCo_mm9_circ_000219	104	-	exon	21.4605	10.3118	2.5109
chr1	183853690	183853971	CiCo_mm9_circ_000220	281	-	exon	46.0259	61.1122	77.5976
chr1	183860808	183860893	CiCo_mm9_circ_000220	85	-	exon	60.7881	82.3597	109.75
chr1	183865790	183865847	CiCo_mm9_circ_000220	57	-	exon	4.66211	3.88916	5.45472
chr1	183886524	183886702	CiCo_mm9_circ_000220	178	-	exon	36.2551	46.8784	57.4422
chr1	183891884	183892050	CiCo_mm9_circ_000220	166	-	exon	36.2551	46.8784	57.4422
chr1	183886524	183886702	CiCo_mm9_circ_000221	178	-	exon	25.3671	40.2516	45.7826
chr1	183891884	183892050	CiCo_mm9_circ_000221	166	-	exon	25.3671	40.2516	45.7826
chr1	184414333	184414503	CiCo_mm9_circ_000222	170	-	exon	8.9607	6.59564	6.47549
chr1	184416674	184416835	CiCo_mm9_circ_000222	161	-	exon	10.0149	15.595	6.83523
chr1	184417845	184417920	CiCo_mm9_circ_000222	75	-	exon	24.9055	26.1188	13.876
chr1	184419124	184419210	CiCo_mm9_circ_000222	86	-	exon	24.8646	16.5937	9.0912
chr1	184420095	184420179	CiCo_mm9_circ_000222	84	-	exon	22.2684	13.2689	6.20341
chr1	184420997	184421166	CiCo_mm9_circ_000222	169	-	exon	13.7852	12.2074	4.34238
chr1	184422192	184422326	CiCo_mm9_circ_000222	134	-	exon	16.6915	16.0406	7.42111
chr1	186735874	186736068	CiCo_mm9_circ_000223	194	-	exon	11.0934	12.7245	22.4436
chr1	186736360	186736514	CiCo_mm9_circ_000223	154	-	exon	11.0487	10.4781	22.7925
chr1	186738395	186738508	CiCo_mm9_circ_000223	113	-	exon	7.9065	11.8722	20.3515
chr1	186739957	186740057	CiCo_mm9_circ_000223	100	-	exon	10.709	9.38018	26.1034
chr1	186743188	186743308	CiCo_mm9_circ_000223	120	-	exon	16.388	11.931	17.8668
chr1	186743396	186743633	CiCo_mm9_circ_000223	237	-	exon	16.388	11.931	17.8668
chr1	186745430	186745487	CiCo_mm9_circ_000223	57	-	exon	10.604	7.96133	14.4008
chr1	186749694	186749765	CiCo_mm9_circ_000223	71	-	exon	10.604	7.96133	14.4008
chr1	186751912	186751978	CiCo_mm9_circ_000223	66	-	exon	15.5404	7.77831	34.5466
chr1	186753200	186753249	CiCo_mm9_circ_000223	49	-	exon	15.5404	7.77831	34.5466
chr1	186767084	186767138	CiCo_mm9_circ_000223	54	-	exon	17.5261	11.2786	31.4909
chr1	186768675	186768879	CiCo_mm9_circ_000223	204	-	exon	17.5261	11.2786	31.4909
chr1	186743188	186743308	CiCo_mm9_circ_000224	120	-	exon	10.7623	15.487	31.48
chr1	186743396	186743633	CiCo_mm9_circ_000224	237	-	exon	10.7623	15.487	31.48
chr1	186745430	186745487	CiCo_mm9_circ_000224	57	-	exon	21.6322	27.9708	32.692
chr1	186749694	186749765	CiCo_mm9_circ_000224	71	-	exon	21.6322	27.9708	32.692
chr1	186751912	186751978	CiCo_mm9_circ_000224	66	-	exon	14.7492	18.8659	25.8851
chr1	186753200	186753249	CiCo_mm9_circ_000224	49	-	exon	14.7492	18.8659	25.8851
chr1	186767084	186767138	CiCo_mm9_circ_000225	54	-	exon	5.71582	9.68305	12.8607
chr1	186768675	186768879	CiCo_mm9_circ_000225	204	-	exon	5.71582	9.68305	12.8607
chr1	187056839	187056963	CiCo_mm9_circ_000226	124	+	exon	2.16322	7.57919	8.0148
chr1	187057999	187058081	CiCo_mm9_circ_000226	82	+	exon	9.77358	10.3273	12.7058
chr1	187059182	187059230	CiCo_mm9_circ_000226	48	+	exon	18.3947	12.8898	17.2176
chr1	187059309	187059385	CiCo_mm9_circ_000226	76	+	exon	15.2174	15.2334	10.9567
chr1	187059838	187059940	CiCo_mm9_circ_000226	102	+	exon	10.5011	11.8261	6.65511
chr1	187062657	187062757	CiCo_mm9_circ_000226	100	+	exon	9.81658	9.82686	4.17655
chr1	187064540	187064639	CiCo_mm9_circ_000226	99	+	exon	7.21073	5.86485	6.32747
chr1	187070514	187070663	CiCo_mm9_circ_000226	149	+	exon	5.40805	3.60914	5.62442
chr1	187071722	187071802	CiCo_mm9_circ_000226	80	+	exon	13.3532	10.0254	13.0195
chr1	187071891	187071981	CiCo_mm9_circ_000226	90	+	exon	13.8668	9.91521	12.7477
chr1	187073758	187073898	CiCo_mm9_circ_000226	140	+	exon	4.47474	6.39918	9.34911
chr1	187074811	187075028	CiCo_mm9_circ_000226	217	+	exon	3.30767	4.9667	5.56315
chr1	187075542	187075686	CiCo_mm9_circ_000226	144	+	exon	8.08099	4.35585	5.81837
chr1	187075909	187075992	CiCo_mm9_circ_000226	83	+	exon	10.7302	9.66733	8.16043
chr1	187076194	187076259	CiCo_mm9_circ_000226	65	+	exon	9.55968	8.88613	7.98924
chr1	187079623	187079714	CiCo_mm9_circ_000226	91	+	exon	6.85803	7.35558	7.45083
chr1	187082376	187082504	CiCo_mm9_circ_000226	128	+	exon	2.79486	3.84695	5.72252
chr1	187084279	187084377	CiCo_mm9_circ_000226	98	+	exon	7.28356	5.92409	6.39139
chr1	187085208	187085314	CiCo_mm9_circ_000226	106	+	exon	5.89662	5.48117	5.42073
chr1	187086557	187086718	CiCo_mm9_circ_000226	161	+	exon	5.00745	5.01269	3.90585
chr1	187087509	187087738	CiCo_mm9_circ_000226	229	+	exon	5.87831	4.90372	3.6681
chr1	187090779	187090953	CiCo_mm9_circ_000226	174	+	exon	9.27094	3.86693	6.32747
chr1	187091051	187091158	CiCo_mm9_circ_000226	107	+	exon	9.27094	3.86693	6.32747
chr1	187090779	187090953	CiCo_mm9_circ_000227	174	+	exon	12.5186	6.68359	6.347
chr1	187091051	187091158	CiCo_mm9_circ_000227	107	+	exon	12.5186	6.68359	6.347
chr1	187210124	187210209	CiCo_mm9_circ_000228	85	+	exon	28.2979	28.8521	20.8463
chr1	187210937	187210997	CiCo_mm9_circ_000228	60	+	exon	48.7611	41.4163	25.9323
chr1	187218241	187218352	CiCo_mm9_circ_000228	111	+	exon	29.7764	19.7375	18.8318
chr1	187219908	187220045	CiCo_mm9_circ_000228	137	+	exon	13.0629	11.7689	14.1375
chr1	187220938	187221146	CiCo_mm9_circ_000228	208	+	exon	17.2505	14.4624	11.1008
chr1	188559994	188560193	CiCo_mm9_circ_000229	199	-	exon	9.01341	5.18813	3.69103
chr1	188561466	188561564	CiCo_mm9_circ_000229	98	-	exon	14.5671	9.11398	7.98924
chr1	188563482	188563742	CiCo_mm9_circ_000229	260	-	exon	8.63353	5.35839	3.43445
chr1	190797944	190798083	CiCo_mm9_circ_000231	139	-	exon	5.15052	8.05611	9.03925
chr1	190798165	190798350	CiCo_mm9_circ_000231	185	-	exon	4.36133	8.97433	9.35514
chr1	190800489	190800586	CiCo_mm9_circ_000231	97	-	exon	10.1171	14.7312	13.9893
chr1	190802375	190802531	CiCo_mm9_circ_000231	156	-	exon	6.88923	13.7929	10.0756
chr1	191066765	191066905	CiCo_mm9_circ_000233	140	-	exon	1.2785	2.87963	5.98343
chr1	191080446	191080633	CiCo_mm9_circ_000233	187	-	exon	1.43831	2.39969	4.76804
chr1	191082616	191082777	CiCo_mm9_circ_000233	161	-	exon	1.43831	2.39969	4.76804
chr1	191080446	191080633	CiCo_mm9_circ_000234	187	-	exon	1.66915	2.50634	4.23134
chr1	191082616	191082777	CiCo_mm9_circ_000234	161	-	exon	1.66915	2.50634	4.23134
chr1	191492394	191492517	CiCo_mm9_circ_000235	123	-	exon	12.3571	15.6444	0
chr1	191494926	191495055	CiCo_mm9_circ_000235	129	-	exon	15.2535	14.2283	0
chr1	191496387	191496513	CiCo_mm9_circ_000235	126	-	exon	15.2535	14.2283	0
chr1	191494926	191495055	CiCo_mm9_circ_000236	129	-	exon	16.3235	13.4987	0.415189
chr1	191496387	191496513	CiCo_mm9_circ_000236	126	-	exon	16.3235	13.4987	0.415189
chr1	191502817	191503020	CiCo_mm9_circ_000237	203	-	exon	10.604	10.1728	0.516951
chr1	191504099	191504385	CiCo_mm9_circ_000237	286	-	exon	8.47951	8.64558	0.367449
chr1	191506239	191506331	CiCo_mm9_circ_000237	92	-	exon	13.5686	11.6424	0
chr1	191506708	191506830	CiCo_mm9_circ_000237	122	-	exon	10.2592	9.90312	0.428691
chr1	191707702	191707877	CiCo_mm9_circ_000238	175	-	exon	5.63338	3.07597	5.39273
chr1	191709177	191709298	CiCo_mm9_circ_000238	121	-	exon	6.64924	5.91662	8.64409
chr1	191710399	191710510	CiCo_mm9_circ_000238	111	-	exon	10.462	3.62525	6.59112
chr1	191712693	191712796	CiCo_mm9_circ_000238	103	-	exon	7.80007	2.60274	8.11215
chr1	191977294	191977402	CiCo_mm9_circ_000239	108	-	exon	0.826918	3.72503	0.967504
chr1	192657884	192657977	CiCo_mm9_circ_000240	93	-	exon	4.79437	5.75926	3.36568
chr1	192668365	192668481	CiCo_mm9_circ_000240	116	-	exon	6.16301	6.94065	6.76012
chr1	192668365	192668481	CiCo_mm9_circ_000241	116	-	exon	6.16301	6.94065	6.76012
chr1	192695470	192695830	CiCo_mm9_circ_000241	360	-	exon	12.7336	11.2473	12.2693
chr1	192709212	192709306	CiCo_mm9_circ_000241	94	-	exon	12.7336	11.2473	12.2693
chr1	192712527	192712643	CiCo_mm9_circ_000241	116	-	exon	12.7336	11.2473	12.2693
chr1	192723329	192723450	CiCo_mm9_circ_000241	121	-	exon	28.4634	22.3197	27.7521
chr1	192695470	192695830	CiCo_mm9_circ_000242	360	-	exon	28.4634	22.3197	27.7521
chr1	192695470	192695830	CiCo_mm9_circ_000243	360	-	exon	28.4634	22.3197	27.7521
chr1	192709212	192709306	CiCo_mm9_circ_000243	94	-	exon	33.8966	20.0508	27.9418
chr1	192712527	192712643	CiCo_mm9_circ_000243	116	-	exon	33.8966	20.0508	27.9418
chr1	192723329	192723450	CiCo_mm9_circ_000243	121	-	exon	33.8966	20.0508	27.9418
chr1	192709212	192709306	CiCo_mm9_circ_000244	94	-	exon	20.6865	15.1613	22.4746
chr1	192712527	192712643	CiCo_mm9_circ_000244	116	-	exon	20.6865	15.1613	22.4746
chr1	192723329	192723450	CiCo_mm9_circ_000244	121	-	exon	20.6865	15.1613	22.4746
chr1	192790081	192790156	CiCo_mm9_circ_000246	75	-	exon	13.0457	14.2466	41.6281
chr1	192790807	192790864	CiCo_mm9_circ_000246	57	-	exon	15.5404	14.7788	36.3648
chr1	193168855	193168998	CiCo_mm9_circ_000247	143	+	exon	5.63338	5.63928	7.32347
chr1	193170638	193170783	CiCo_mm9_circ_000247	145	+	exon	6.17357	5.56203	5.77852
chr1	193380319	193380424	CiCo_mm9_circ_000248	105	-	exon	10.2039	8.08651	0
chr1	193380662	193380766	CiCo_mm9_circ_000248	104	-	exon	15.4516	8.59318	1.50654
chr1	193381939	193382013	CiCo_mm9_circ_000248	74	-	exon	22.834	10.2259	2.10916
chr1	193385303	193385416	CiCo_mm9_circ_000248	113	-	exon	22.1382	8.70625	0.462535
chr1	193406277	193406407	CiCo_mm9_circ_000249	130	+	exon	28.898	21.0074	13.2829
chr1	193407057	193407204	CiCo_mm9_circ_000249	147	+	exon	15.2254	17.0702	8.55064
chr1	193947419	193947498	CiCo_mm9_circ_000250	79	-	exon	10.1401	4.51142	5.2729
chr1	193948123	193948248	CiCo_mm9_circ_000250	125	-	exon	7.1535	3.22244	5.44029
chr1	193949746	193949908	CiCo_mm9_circ_000250	162	-	exon	3.31782	3.59807	3.23491
chr1	194812911	194813076	CiCo_mm9_circ_000253	165	-	exon	2.17191	2.71772	3.81173
chr1	196469879	196471141	CiCo_mm9_circ_000254	1262	+	exon	11.0616	44.5427	51.8105
chr1	196475649	196475832	CiCo_mm9_circ_000254	183	+	exon	11.0616	44.5427	51.8105
chr1	196469879	196471141	CiCo_mm9_circ_000255	1262	+	exon	11.7566	50.2631	57.3141
chr1	196475649	196475832	CiCo_mm9_circ_000255	183	+	exon	11.7566	50.2631	57.3141
chr1	196538377	196538512	CiCo_mm9_circ_000255	135	+	exon	12.5923	44.119	69.0129
chr1	22336373	22336609	CiCo_mm9_circ_000257	236	-	exon	0.760625	0.761421	4.22722
chr1	22363424	22363591	CiCo_mm9_circ_000257	167	-	exon	1.07302	1.07415	4.08022
chr1	22369508	22369621	CiCo_mm9_circ_000257	113	-	exon	0.79065	1.58295	6.93802
chr1	24050952	24051108	CiCo_mm9_circ_000258	156	-	exon	15.5008	9.4826	5.0378
chr1	24053196	24053246	CiCo_mm9_circ_000258	50	-	exon	28.2774	15.0381	14.4746
chr1	24060021	24060175	CiCo_mm9_circ_000258	154	-	exon	6.97812	9.02284	4.76262
chr1	24060842	24060969	CiCo_mm9_circ_000258	127	-	exon	9.85842	9.51628	4.94334
chr1	24062582	24062756	CiCo_mm9_circ_000258	174	-	exon	7.21073	9.28064	4.51962
chr1	24064042	24064113	CiCo_mm9_circ_000258	71	-	exon	11.2668	12.5317	4.39408
chr1	24064204	24064344	CiCo_mm9_circ_000258	140	-	exon	7.67099	4.47942	4.86153
chr1	24074737	24074817	CiCo_mm9_circ_000258	80	-	exon	13.3532	7.24055	11.0666
chr1	24092249	24092365	CiCo_mm9_circ_000258	116	-	exon	13.0964	13.1101	9.46417
chr1	24093358	24093450	CiCo_mm9_circ_000258	92	-	exon	13.0964	13.1101	9.46417
chr1	24092249	24092365	CiCo_mm9_circ_000259	116	-	exon	10.661	15.0381	3.96885
chr1	24093358	24093450	CiCo_mm9_circ_000259	92	-	exon	10.661	15.0381	3.96885
chr1	25150609	25151253	CiCo_mm9_circ_000260	644	-	exon	2.23588	1.74861	3.59701
chr1	25183485	25183552	CiCo_mm9_circ_000261	67	-	exon	7.95301	3.98067	7.75426
chr1	25185663	25185733	CiCo_mm9_circ_000261	70	-	exon	6.34747	5.08329	11.8826
chr1	25188095	25188246	CiCo_mm9_circ_000261	151	-	exon	2.96494	3.26484	5.89732
chr1	25278604	25278707	CiCo_mm9_circ_000262	103	-	exon	6.06672	6.07307	5.5771
chr1	25283564	25283668	CiCo_mm9_circ_000262	104	-	exon	6.86736	5.58557	8.53707
chr1	25285265	25285392	CiCo_mm9_circ_000262	127	-	exon	4.92921	5.28682	8.2389
chr1	25477402	25477505	CiCo_mm9_circ_000263	103	-	exon	6.06672	7.37444	3.54906
chr1	25488267	25488343	CiCo_mm9_circ_000263	76	-	exon	7.02344	9.37438	3.42396
chr1	25489271	25489421	CiCo_mm9_circ_000263	150	-	exon	7.75989	4.18277	1.74599
chr1	25544769	25544964	CiCo_mm9_circ_000264	195	-	exon	6.89802	3.91297	3.2283
chr1	25561277	25561384	CiCo_mm9_circ_000264	107	-	exon	10.8495	8.35448	2.44116
chr1	25561757	25561859	CiCo_mm9_circ_000264	102	-	exon	8.75088	8.32204	3.58352
chr1	25588714	25588879	CiCo_mm9_circ_000264	165	-	exon	8.68762	5.97899	4.76466
chr1	25589319	25589484	CiCo_mm9_circ_000264	165	-	exon	8.68762	5.97899	4.76466
chr1	25604260	25604425	CiCo_mm9_circ_000264	165	-	exon	9.2306	7.06608	4.76466
chr1	25610519	25610681	CiCo_mm9_circ_000264	162	-	exon	9.2306	7.06608	4.76466
chr1	25616599	25616710	CiCo_mm9_circ_000264	111	-	exon	10.8595	7.8814	4.76466
chr1	25588714	25588879	CiCo_mm9_circ_000265	165	-	exon	10.8595	7.8814	4.76466
chr1	25589319	25589484	CiCo_mm9_circ_000265	165	-	exon	10.8595	7.8814	4.76466
chr1	25604260	25604425	CiCo_mm9_circ_000265	165	-	exon	8.29455	5.53549	5.17585
chr1	25610519	25610681	CiCo_mm9_circ_000265	162	-	exon	8.29455	5.53549	5.17585
chr1	25616599	25616710	CiCo_mm9_circ_000265	111	-	exon	8.29455	5.53549	5.17585
chr1	25604260	25604425	CiCo_mm9_circ_000266	165	-	exon	10.462	7.2505	3.76635
chr1	25610519	25610681	CiCo_mm9_circ_000266	162	-	exon	10.462	7.2505	3.76635
chr1	25616599	25616710	CiCo_mm9_circ_000266	111	-	exon	10.462	7.2505	3.76635
chr1	33568860	33569046	CiCo_mm9_circ_000269	186	-	exon	12.532	7.23757	2.81973
chr1	33570989	33571062	CiCo_mm9_circ_000269	73	-	exon	12.532	7.23757	2.81973
chr1	33568860	33569046	CiCo_mm9_circ_000270	186	-	exon	17.0524	10.9737	1.42511
chr1	33570989	33571062	CiCo_mm9_circ_000270	73	-	exon	17.0524	10.9737	1.42511
chr1	33590140	33590208	CiCo_mm9_circ_000270	68	-	exon	9.14404	7.19212	3.05675
chr1	33685239	33685377	CiCo_mm9_circ_000271	138	-	exon	13.6174	12.3334	4.93148
chr1	33687182	33687278	CiCo_mm9_circ_000271	96	-	exon	19.5136	14.883	9.24116
chr1	33778452	33778544	CiCo_mm9_circ_000272	92	+	exon	5.8151	5.82119	8.50467
chr1	33780630	33780850	CiCo_mm9_circ_000272	220	+	exon	4.07847	6.32824	5.24904
chr1	33781778	33781864	CiCo_mm9_circ_000272	86	+	exon	13.4683	10.3711	7.27296
chr1	33838912	33839039	CiCo_mm9_circ_000273	127	-	exon	4.22504	4.22946	3.29556
chr1	33839885	33840036	CiCo_mm9_circ_000273	151	-	exon	7.11585	8.31051	2.77521
chr1	33840697	33840809	CiCo_mm9_circ_000273	112	-	exon	13.56	6.78709	5.13291
chr1	34500407	34500540	CiCo_mm9_circ_000275	133	+	exon	8.74435	12.4569	9.05049
chr1	34500613	34500768	CiCo_mm9_circ_000275	155	+	exon	10.9779	13.8813	7.43613
chr1	34874841	34874971	CiCo_mm9_circ_000279	130	-	exon	53.6676	46.1474	49.1064
chr1	34876436	34876614	CiCo_mm9_circ_000279	178	-	exon	64.4534	57.7159	62.1554
chr1	34876711	34876854	CiCo_mm9_circ_000279	143	-	exon	61.3413	66.1048	72.1361
chr1	36222353	36222456	CiCo_mm9_circ_000280	103	-	exon	10.4001	11.7123	11.1542
chr1	36227043	36227139	CiCo_mm9_circ_000280	96	-	exon	9.29217	12.5576	11.4155
chr1	36239314	36239479	CiCo_mm9_circ_000281	165	-	exon	10.8595	7.06608	8.5764
chr1	36241200	36241332	CiCo_mm9_circ_000281	132	-	exon	8.1324	9.15852	6.73979
chr1	36242677	36242813	CiCo_mm9_circ_000281	136	-	exon	3.94748	8.56182	3.84883
chr1	36248373	36248459	CiCo_mm9_circ_000281	86	-	exon	6.21614	12.9639	7.27296
chr1	36249230	36249350	CiCo_mm9_circ_000281	120	-	exon	8.19401	11.931	6.10087
chr1	36252694	36252845	CiCo_mm9_circ_000281	151	-	exon	7.70884	8.60732	6.24422
chr1	36254388	36254480	CiCo_mm9_circ_000281	92	-	exon	13.5686	11.6424	7.37071
chr1	36258549	36258610	CiCo_mm9_circ_000282	61	-	exon	26.168	16.7359	9.35514
chr1	36259623	36259723	CiCo_mm9_circ_000282	100	-	exon	14.2787	12.5069	9.39724
chr1	36264786	36264887	CiCo_mm9_circ_000283	101	-	exon	19.4407	16.365	14.9916
chr1	36266830	36266909	CiCo_mm9_circ_000283	79	-	exon	13.5201	20.8653	13.1822
chr1	36268234	36268331	CiCo_mm9_circ_000283	97	-	exon	6.43815	11.5087	11.8371
chr1	36272976	36273151	CiCo_mm9_circ_000283	175	-	exon	8.70613	5.63928	6.59112
chr1	36278056	36278169	CiCo_mm9_circ_000283	113	-	exon	12.6504	11.4764	7.86309
chr1	36278056	36278169	CiCo_mm9_circ_000284	113	-	exon	12.6504	11.4764	7.86309
chr1	36284328	36284459	CiCo_mm9_circ_000284	131	-	exon	9.55968	10.595	5.193
chr1	36287502	36287585	CiCo_mm9_circ_000284	83	-	exon	9.55968	10.595	5.193
chr1	36291651	36291787	CiCo_mm9_circ_000284	136	-	exon	8.5842	10.7415	8.78816
chr1	36284328	36284459	CiCo_mm9_circ_000285	131	-	exon	8.5842	10.7415	8.78816
chr1	36287502	36287585	CiCo_mm9_circ_000285	83	-	exon	7.23704	7.90322	7.69766
chr1	36291651	36291787	CiCo_mm9_circ_000285	136	-	exon	7.23704	7.90322	7.69766
chr1	36400095	36400229	CiCo_mm9_circ_000286	134	-	exon	10.0149	6.68359	7.42111
chr1	36400517	36400740	CiCo_mm9_circ_000286	223	-	exon	5.231	8.05611	6.59112
chr1	36400914	36401024	CiCo_mm9_circ_000286	110	-	exon	13.8043	7.31582	11.4009
chr1	36401760	36401891	CiCo_mm9_circ_000286	131	-	exon	13.6567	5.12661	7.19031
chr1	36402229	36402311	CiCo_mm9_circ_000286	82	-	exon	28.2348	13.0451	8.89404
chr1	36402682	36402874	CiCo_mm9_circ_000286	192	-	exon	14.9445	7.48008	6.83018
chr1	38079008	38079159	CiCo_mm9_circ_000288	151	+	exon	14.2317	10.0913	4.16281
chr1	38110460	38110563	CiCo_mm9_circ_000289	103	-	exon	2.60002	5.63928	2.53505
chr1	38110684	38110841	CiCo_mm9_circ_000289	157	-	exon	5.70469	4.85406	4.00473
chr1	38110928	38111140	CiCo_mm9_circ_000289	212	-	exon	6.34747	4.87149	3.2182
chr1	38111589	38111710	CiCo_mm9_circ_000289	121	-	exon	8.12684	7.02598	4.75425
chr1	38112135	38112369	CiCo_mm9_circ_000289	234	-	exon	4.98614	6.71914	3.36568
chr1	38113108	38113311	CiCo_mm9_circ_000289	203	-	exon	5.74384	9.06707	3.61865
chr1	38113561	38113727	CiCo_mm9_circ_000289	166	-	exon	7.55615	7.29391	5.9991
chr1	38114518	38114621	CiCo_mm9_circ_000289	103	-	exon	6.06672	6.94065	3.54906
chr1	38115966	38116139	CiCo_mm9_circ_000289	173	-	exon	9.32422	6.48193	3.63648
chr1	38119959	38120180	CiCo_mm9_circ_000289	221	-	exon	10.1502	6.29973	4.0378
chr1	38124344	38124464	CiCo_mm9_circ_000289	120	-	exon	11.1736	6.33836	5.22932
chr1	38128187	38128342	CiCo_mm9_circ_000289	155	-	exon	11.1736	6.33836	5.22932
chr1	38131159	38131288	CiCo_mm9_circ_000289	129	-	exon	10.4001	6.65145	4.73209
chr1	38136134	38136243	CiCo_mm9_circ_000289	109	-	exon	10.4001	6.65145	4.73209
chr1	38140548	38140665	CiCo_mm9_circ_000289	117	-	exon	8.32007	7.98174	2.02804
chr1	38142389	38142497	CiCo_mm9_circ_000289	108	-	exon	8.32007	7.98174	2.02804
chr1	38124344	38124464	CiCo_mm9_circ_000290	120	-	exon	12.291	6.15194	5.2729
chr1	38128187	38128342	CiCo_mm9_circ_000290	155	-	exon	12.291	6.15194	5.2729
chr1	38131159	38131288	CiCo_mm9_circ_000290	129	-	exon	12.291	6.15194	5.2729
chr1	38136134	38136243	CiCo_mm9_circ_000290	109	-	exon	10.6939	8.79345	4.91541
chr1	38140548	38140665	CiCo_mm9_circ_000290	117	-	exon	10.6939	8.79345	4.91541
chr1	38142389	38142497	CiCo_mm9_circ_000290	108	-	exon	10.6939	8.79345	4.91541
chr1	38136134	38136243	CiCo_mm9_circ_000291	109	-	exon	11.5769	8.27784	5.80502
chr1	38140548	38140665	CiCo_mm9_circ_000291	117	-	exon	11.5769	8.27784	5.80502
chr1	38164412	38164539	CiCo_mm9_circ_000292	127	-	exon	9.85842	9.16382	5.35528
chr1	38165248	38165312	CiCo_mm9_circ_000292	64	-	exon	41.6004	27.7626	11.357
chr1	38591750	38592136	CiCo_mm9_circ_000293	386	-	exon	14.9059	26.5789	56.6802
chr1	38592255	38592568	CiCo_mm9_circ_000293	313	-	exon	14.9059	26.5789	56.6802
chr1	38593670	38593791	CiCo_mm9_circ_000293	121	-	exon	14.6396	31.3213	68.682
chr1	38591750	38592136	CiCo_mm9_circ_000294	386	-	exon	14.6396	31.3213	68.682
chr1	38592255	38592568	CiCo_mm9_circ_000294	313	-	exon	9.60445	38.0882	76.5002
chr1	38593670	38593791	CiCo_mm9_circ_000294	121	-	exon	9.60445	38.0882	76.5002
chr1	38595771	38595846	CiCo_mm9_circ_000294	75	-	exon	1.18597	3.56165	34.6901
chr1	39620892	39620961	CiCo_mm9_circ_000295	69	-	exon	6.43815	10.3118	8.28598
chr1	39621926	39622177	CiCo_mm9_circ_000295	251	-	exon	4.2921	5.72879	2.92939
chr1	40030771	40030897	CiCo_mm9_circ_000297	126	+	exon	37.615	73.8878	65.5998
chr1	40033551	40033662	CiCo_mm9_circ_000297	111	+	exon	47.4814	103.924	96.9836
chr1	40037404	40037495	CiCo_mm9_circ_000297	91	+	exon	78.3775	121.612	130.103
chr1	40039983	40040114	CiCo_mm9_circ_000297	131	+	exon	58.7237	123.722	105.458
chr1	40040727	40040782	CiCo_mm9_circ_000297	55	+	exon	58.7237	123.722	105.458
chr1	40042026	40042105	CiCo_mm9_circ_000297	79	+	exon	86.915	214.292	166.661
chr1	40043469	40043645	CiCo_mm9_circ_000297	176	+	exon	86.915	214.292	166.661
chr1	40045814	40045887	CiCo_mm9_circ_000297	73	+	exon	55.2071	134.215	94.9121
chr1	40046933	40047144	CiCo_mm9_circ_000297	211	+	exon	55.2071	134.215	94.9121
chr1	40039983	40040114	CiCo_mm9_circ_000298	131	+	exon	34.6278	73.4062	58.3891
chr1	40040727	40040782	CiCo_mm9_circ_000298	55	+	exon	34.6278	73.4062	58.3891
chr1	40042026	40042105	CiCo_mm9_circ_000298	79	+	exon	98.6603	190.211	146.073
chr1	40043469	40043645	CiCo_mm9_circ_000298	176	+	exon	98.6603	190.211	146.073
chr1	40045814	40045887	CiCo_mm9_circ_000298	73	+	exon	68.8761	136.194	113.168
chr1	40046933	40047144	CiCo_mm9_circ_000298	211	+	exon	68.8761	136.194	113.168
chr1	40067522	40068473	CiCo_mm9_circ_000299	951	+	exon	8.23704	10.5677	10.9667
chr1	41894036	41894223	CiCo_mm9_circ_000300	187	+	exon	11.5065	4.79938	0
chr1	41894036	41894381	CiCo_mm9_circ_000301	345	+	exon	10.4201	3.2597	0.152396
chr1	44016928	44017056	CiCo_mm9_circ_000305	128	+	exon	16.0704	6.99445	8.17503
chr1	44017712	44017812	CiCo_mm9_circ_000305	100	+	exon	16.0704	6.99445	8.17503
chr1	44025726	44025875	CiCo_mm9_circ_000305	149	+	exon	14.2787	9.38018	11.4855
chr1	44027245	44027361	CiCo_mm9_circ_000305	116	+	exon	14.2787	9.38018	11.4855
chr1	44028408	44028577	CiCo_mm9_circ_000305	169	+	exon	9.01341	8.42132	9.13969
chr1	44029374	44029532	CiCo_mm9_circ_000305	158	+	exon	9.01341	8.42132	9.13969
chr1	44030288	44030365	CiCo_mm9_circ_000305	77	+	exon	4.62226	6.55506	9.46417
chr1	44016928	44017056	CiCo_mm9_circ_000306	128	+	exon	4.62226	6.55506	9.46417
chr1	44017712	44017812	CiCo_mm9_circ_000306	100	+	exon	6.36241	5.83831	4.65255
chr1	44025726	44025875	CiCo_mm9_circ_000306	149	+	exon	6.36241	5.83831	4.65255
chr1	44027245	44027361	CiCo_mm9_circ_000306	116	+	exon	7.93634	4.82353	4.6428
chr1	44028408	44028577	CiCo_mm9_circ_000306	169	+	exon	7.93634	4.82353	4.6428
chr1	44029374	44029532	CiCo_mm9_circ_000306	158	+	exon	8.08896	8.09742	4.73209
chr1	44030288	44030365	CiCo_mm9_circ_000306	77	+	exon	8.08896	8.09742	4.73209
chr1	44032260	44032367	CiCo_mm9_circ_000306	107	+	exon	8.34575	7.93676	4.88231
chr1	44034051	44034206	CiCo_mm9_circ_000306	155	+	exon	9.82231	5.20549	4.39408
chr1	44035257	44035374	CiCo_mm9_circ_000306	117	+	exon	9.16618	5.73486	8.93711
chr1	44035579	44035680	CiCo_mm9_circ_000306	101	+	exon	12.3713	7.96133	11.8899
chr1	44218654	44218798	CiCo_mm9_circ_000307	144	+	exon	5.59453	6.53378	4.00013
chr1	44220721	44220929	CiCo_mm9_circ_000307	208	+	exon	3.88137	3.88543	5.04583
chr1	5079089	5079192	CiCo_mm9_circ_000309	103	+	exon	8.66674	9.54339	10.1402
chr1	5083443	5083533	CiCo_mm9_circ_000309	90	+	exon	8.66674	9.54339	10.1402
chr1	5085695	5085809	CiCo_mm9_circ_000309	114	+	exon	14.8573	12.8898	12.7477
chr1	5088109	5088214	CiCo_mm9_circ_000309	105	+	exon	14.8573	12.8898	12.7477
chr1	5079089	5079192	CiCo_mm9_circ_000310	103	+	exon	14.8917	17.2611	22.4671
chr1	5083443	5083533	CiCo_mm9_circ_000310	90	+	exon	14.8917	17.2611	22.4671
chr1	5085695	5085809	CiCo_mm9_circ_000310	114	+	exon	15.3058	16.173	23.8773
chr1	5088109	5088214	CiCo_mm9_circ_000310	105	+	exon	15.3058	16.173	23.8773
chr1	5091150	5091204	CiCo_mm9_circ_000310	54	+	exon	13.1104	15.5849	14.3806
chr1	51869846	51869910	CiCo_mm9_circ_000312	64	-	exon	8.32007	24.2923	12.1682
chr1	51876984	51877031	CiCo_mm9_circ_000312	47	-	exon	16.9001	36.6553	18.6748
chr1	51880940	51881045	CiCo_mm9_circ_000312	105	-	exon	15.3058	24.2595	9.45142
chr1	52245522	52245615	CiCo_mm9_circ_000313	93	-	exon	4.79437	12.9583	16.2674
chr1	52246266	52246398	CiCo_mm9_circ_000313	132	-	exon	10.8432	9.15852	13.0831
chr1	52253008	52253059	CiCo_mm9_circ_000314	51	-	exon	12.1334	14.7489	20.2804
chr1	52253586	52253653	CiCo_mm9_circ_000314	67	-	exon	21.208	13.2689	18.6102
chr1	52256554	52256613	CiCo_mm9_circ_000314	59	-	exon	19.5291	12.0305	17.5763
chr1	52256698	52256731	CiCo_mm9_circ_000314	33	-	exon	29.161	22.5571	27.9153
chr1	52264144	52264203	CiCo_mm9_circ_000314	59	-	exon	7.51117	18.7976	20.2128
chr1	52269046	52269210	CiCo_mm9_circ_000314	164	-	exon	9.28654	8.20258	13.7415
chr1	53264806	53264929	CiCo_mm9_circ_000317	123	-	exon	3.63444	1.4553	0.425233
chr1	53313472	53313636	CiCo_mm9_circ_000318	164	-	exon	16.388	6.83549	4.79354
chr1	53324671	53324774	CiCo_mm9_circ_000318	103	-	exon	16.388	6.83549	4.79354
chr1	53331913	53332096	CiCo_mm9_circ_000318	183	-	exon	27.7336	17.3516	8.61916
chr1	53338784	53338936	CiCo_mm9_circ_000318	152	-	exon	27.7336	17.3516	8.61916
chr1	53313472	53313636	CiCo_mm9_circ_000319	164	-	exon	20.5741	13.7304	8.59711
chr1	53324671	53324774	CiCo_mm9_circ_000319	103	-	exon	20.5741	13.7304	8.59711
chr1	53331913	53332096	CiCo_mm9_circ_000319	183	-	exon	18.8516	11.7946	9.64974
chr1	53338784	53338936	CiCo_mm9_circ_000319	152	-	exon	18.8516	11.7946	9.64974
chr1	54820488	54820631	CiCo_mm9_circ_000321	143	-	exon	0	0.939879	6.22495
chr1	54823193	54823281	CiCo_mm9_circ_000321	88	-	exon	2.02549	2.53451	9.47936
chr1	54823627	54823828	CiCo_mm9_circ_000321	201	-	exon	2.67725	2.01004	7.04793
chr1	55758773	55758977	CiCo_mm9_circ_000323	204	+	exon	2.19839	3.08097	4.11543
chr1	56888282	56888480	CiCo_mm9_circ_000325	198	-	exon	1.81174	4.9875	25.967
chr1	56902419	56902575	CiCo_mm9_circ_000325	156	-	exon	1.72231	8.62055	27.54
chr1	56907014	56907227	CiCo_mm9_circ_000325	213	-	exon	2.52712	6.32442	21.4365
chr1	56928155	56928628	CiCo_mm9_circ_000325	473	-	exon	0.950782	4.47335	18.4663
chr1	56948006	56948109	CiCo_mm9_circ_000325	103	-	exon	2.60002	10.8448	25.8575
chr1	57004922	57005099	CiCo_mm9_circ_000326	177	-	exon	4.05097	9.63112	28.4381
chr1	57026496	57026724	CiCo_mm9_circ_000326	228	-	exon	3.93599	11.6233	39.8345
chr1	58508932	58509059	CiCo_mm9_circ_000327	127	+	exon	8.45007	6.34419	7.41501
chr1	58512440	58512579	CiCo_mm9_circ_000327	139	+	exon	5.15052	6.12264	4.89626
chr1	58514623	58514707	CiCo_mm9_circ_000327	84	+	exon	4.2416	6.36906	4.96272
chr1	58533277	58533387	CiCo_mm9_circ_000328	110	-	exon	9.74423	4.47078	3.80028
chr1	58537094	58537193	CiCo_mm9_circ_000328	99	-	exon	9.91475	10.3763	7.38205
chr1	59747329	59747406	CiCo_mm9_circ_000329	77	+	exon	24.2669	12.7245	14.1963
chr1	59749180	59749233	CiCo_mm9_circ_000329	53	+	exon	28.3755	24.228	16.5999
chr1	59752821	59752943	CiCo_mm9_circ_000329	122	+	exon	27.8463	21.2734	10.2886
chr1	59755166	59755303	CiCo_mm9_circ_000329	137	+	exon	27.8463	21.2734	10.2886
chr1	59752821	59752943	CiCo_mm9_circ_000330	122	+	exon	40.495	27.1339	12.227
chr1	59755166	59755303	CiCo_mm9_circ_000330	137	+	exon	40.495	27.1339	12.227
chr1	59870431	59870602	CiCo_mm9_circ_000332	171	+	exon	15.197	15.4752	10.7297
chr1	59872084	59872255	CiCo_mm9_circ_000332	171	+	exon	15.197	15.4752	10.7297
chr1	59870431	59870602	CiCo_mm9_circ_000333	171	+	exon	13.1009	15.4752	8.89035
chr1	59872084	59872255	CiCo_mm9_circ_000333	171	+	exon	13.1009	15.4752	8.89035
chr1	59898274	59898385	CiCo_mm9_circ_000333	111	+	exon	16.0954	14.9038	9.88668
chr1	59899586	59899678	CiCo_mm9_circ_000333	92	+	exon	16.0954	14.9038	9.88668
chr1	59902321	59902552	CiCo_mm9_circ_000333	231	+	exon	18.4145	12.6126	11.3396
chr1	59903901	59904016	CiCo_mm9_circ_000333	115	+	exon	18.4145	12.6126	11.3396
chr1	59898274	59898385	CiCo_mm9_circ_000334	111	+	exon	8.93571	8.55614	7.27296
chr1	59899586	59899678	CiCo_mm9_circ_000334	92	+	exon	24.8646	14.7788	10.9094
chr1	60005896	60006048	CiCo_mm9_circ_000337	152	+	exon	3.53467	4.42296	10.339
chr1	60009778	60009868	CiCo_mm9_circ_000337	90	+	exon	4.95242	9.41945	13.9065
chr1	60015165	60015279	CiCo_mm9_circ_000337	114	+	exon	5.48642	14.1227	11.0043
chr1	60251347	60251439	CiCo_mm9_circ_000338	92	+	exon	8.72265	3.88079	3.40187
chr1	60251858	60252020	CiCo_mm9_circ_000338	162	+	exon	6.63564	3.32129	3.88189
chr1	60491086	60491254	CiCo_mm9_circ_000339	168	+	exon	14.9335	11.7457	20.5924
chr1	60493899	60494076	CiCo_mm9_circ_000339	177	+	exon	8.10194	12.926	13.6266
chr1	60500828	60500926	CiCo_mm9_circ_000339	98	+	exon	8.10194	12.926	13.6266
chr1	60504103	60504250	CiCo_mm9_circ_000339	147	+	exon	17.2985	23.2407	26.0982
chr1	60504921	60505046	CiCo_mm9_circ_000339	125	+	exon	17.2985	23.2407	26.0982
chr1	60493899	60494076	CiCo_mm9_circ_000340	177	+	exon	22.5335	16.4606	19.5952
chr1	60500828	60500926	CiCo_mm9_circ_000340	98	+	exon	22.5335	16.4606	19.5952
chr1	60504103	60504250	CiCo_mm9_circ_000340	147	+	exon	20.7451	21.841	28.8754
chr1	60504921	60505046	CiCo_mm9_circ_000340	125	+	exon	20.7451	21.841	28.8754
chr1	60510447	60510606	CiCo_mm9_circ_000340	159	+	exon	15.2101	16.0719	12.5231
chr1	60560361	60560439	CiCo_mm9_circ_000342	78	-	exon	3.42281	7.99492	4.00473
chr1	60567260	60567335	CiCo_mm9_circ_000342	75	-	exon	0	1.78082	6.93802
chr1	60582435	60582944	CiCo_mm9_circ_000342	509	-	exon	3.53467	2.91915	4.23899
chr1	60584227	60584333	CiCo_mm9_circ_000342	106	-	exon	7.58137	5.05954	6.89912
chr1	62390507	62390714	CiCo_mm9_circ_000343	207	+	exon	3.4667	4.3379	0
chr1	63132241	63132972	CiCo_mm9_circ_000345	731	-	exon	6.1567	5.97825	3.81781
chr1	63139858	63140105	CiCo_mm9_circ_000346	247	-	exon	6.54199	4.5478	2.5514
chr1	63140213	63140304	CiCo_mm9_circ_000346	91	-	exon	6.54199	4.5478	2.5514
chr1	63139858	63140105	CiCo_mm9_circ_000347	247	-	exon	9.79718	6.86521	4.58513
chr1	63140213	63140304	CiCo_mm9_circ_000347	91	-	exon	9.79718	6.86521	4.58513
chr1	63152229	63152333	CiCo_mm9_circ_000347	104	-	exon	7.72578	6.01523	3.51526
chr1	63194969	63195145	CiCo_mm9_circ_000349	176	-	exon	13.24	8.15624	5.95807
chr1	63207453	63207588	CiCo_mm9_circ_000350	135	-	exon	9.94126	12.9372	7.36654
chr1	63210240	63210426	CiCo_mm9_circ_000350	186	-	exon	9.64001	13.2689	5.63946
chr1	63211303	63211434	CiCo_mm9_circ_000350	131	-	exon	16.388	18.114	13.9812
chr1	63211522	63211604	CiCo_mm9_circ_000350	82	-	exon	23.891	18.4805	19.6939
chr1	63212864	63212941	CiCo_mm9_circ_000350	77	-	exon	23.1113	17.3516	12.8442
chr1	64125280	64125908	CiCo_mm9_circ_000352	628	-	exon	3.00925	5.52272	15.6762
chr1	64597422	64597544	CiCo_mm9_circ_000353	122	+	exon	20.5183	20.173	17.5763
chr1	64605076	64605223	CiCo_mm9_circ_000353	147	+	exon	20.5183	20.173	17.5763
chr1	64612790	64612891	CiCo_mm9_circ_000353	101	+	exon	12.7893	13.4123	8.19436
chr1	64616707	64616850	CiCo_mm9_circ_000353	143	+	exon	12.7893	13.4123	8.19436
chr1	64597422	64597544	CiCo_mm9_circ_000354	122	+	exon	15.0223	15.9227	9.82206
chr1	64605076	64605223	CiCo_mm9_circ_000354	147	+	exon	15.0223	15.9227	9.82206
chr1	64612790	64612891	CiCo_mm9_circ_000354	101	+	exon	18.7779	18.7976	10.2529
chr1	64616707	64616850	CiCo_mm9_circ_000354	143	+	exon	18.7779	18.7976	10.2529
chr1	64622752	64622903	CiCo_mm9_circ_000354	151	+	exon	17.1966	16.0274	8.67253
chr1	65236892	65237073	CiCo_mm9_circ_000355	181	+	exon	7.42863	7.18853	5.50467
chr1	65238718	65238868	CiCo_mm9_circ_000355	150	+	exon	4.77532	3.28647	4.19038
chr1	65239107	65239140	CiCo_mm9_circ_000355	33	+	exon	10.604	0	3.1017
chr1	65242229	65242348	CiCo_mm9_circ_000355	119	+	exon	6.00894	3.38357	3.95467
chr1	65243185	65243357	CiCo_mm9_circ_000355	172	+	exon	4.68906	2.86853	4.57187
chr1	65249289	65249497	CiCo_mm9_circ_000355	208	+	exon	3.88137	3.88543	4.79354
chr1	65252162	65252252	CiCo_mm9_circ_000355	90	+	exon	4.95242	4.95761	10.4299
chr1	65304482	65304543	CiCo_mm9_circ_000356	61	+	exon	8.72265	8.73178	5.95327
chr1	65305356	65305494	CiCo_mm9_circ_000356	138	+	exon	3.24223	5.193	4.17279
chr1	66408776	66408854	CiCo_mm9_circ_000357	78	+	exon	28.5234	85.0888	211.583
chr1	66427062	66427347	CiCo_mm9_circ_000357	285	+	exon	14.4971	38.9623	94.5803
chr1	66427062	66427347	CiCo_mm9_circ_000358	285	+	exon	14.4971	38.9623	94.5803
chr1	66458980	66462721	CiCo_mm9_circ_000359	3741	+	exon	1.99923	3.89414	20.5448
chr1	66462917	66463124	CiCo_mm9_circ_000359	207	+	exon	3.4667	3.03653	20.7874
chr1	66819479	66819601	CiCo_mm9_circ_000362	122	-	exon	4.39679	4.0346	2.14345
chr1	66824540	66824682	CiCo_mm9_circ_000362	142	-	exon	4.39679	4.0346	2.14345
chr1	66819479	66819601	CiCo_mm9_circ_000363	122	-	exon	4.41216	3.78581	1.1062
chr1	66824540	66824682	CiCo_mm9_circ_000363	142	-	exon	4.41216	3.78581	1.1062
chr1	6823643	6823759	CiCo_mm9_circ_000365	116	+	exon	1.54075	2.69914	3.6054
chr1	68297153	68297252	CiCo_mm9_circ_000366	99	-	exon	0	0	7.38205
chr1	68301102	68301225	CiCo_mm9_circ_000366	123	-	exon	0	0	7.38205
chr1	68305754	68305887	CiCo_mm9_circ_000366	133	-	exon	0.726888	0	5.95327
chr1	68297153	68297252	CiCo_mm9_circ_000367	99	-	exon	0.726888	0	5.95327
chr1	68301102	68301225	CiCo_mm9_circ_000367	123	-	exon	1.34528	0	7.47649
chr1	68305754	68305887	CiCo_mm9_circ_000367	133	-	exon	1.34528	0	7.47649
chr1	68337012	68337057	CiCo_mm9_circ_000367	45	-	exon	0	0	6.87769
chr1	68344860	68345015	CiCo_mm9_circ_000367	155	-	exon	1.15557	0	4.73209
chr1	68786955	68787107	CiCo_mm9_circ_000368	152	-	exon	0.589112	0.589728	5.85877
chr1	71134682	71134825	CiCo_mm9_circ_000371	143	-	exon	8.13711	4.3861	0.732347
chr1	71136044	71136101	CiCo_mm9_circ_000371	57	-	exon	12.4323	3.88916	0.90912
chr1	72365572	72365764	CiCo_mm9_circ_000373	192	+	exon	7.00524	7.48008	3.8249
chr1	72371647	72371762	CiCo_mm9_circ_000373	115	+	exon	6.21614	5.0559	3.18192
chr1	72372789	72372928	CiCo_mm9_circ_000373	139	+	exon	5.15052	2.9002	1.12991
chr1	72376499	72376612	CiCo_mm9_circ_000373	113	+	exon	8.69715	2.77017	0.925069
chr1	72381209	72381272	CiCo_mm9_circ_000373	63	+	exon	14.0835	5.63928	2.47167
chr1	72385533	72385671	CiCo_mm9_circ_000373	138	+	exon	3.24223	4.86844	3.4141
chr1	72386562	72386653	CiCo_mm9_circ_000373	91	+	exon	5.87831	5.88446	3.43884
chr1	72389582	72389716	CiCo_mm9_circ_000373	134	+	exon	8.01192	4.67851	2.73409
chr1	72493729	72493922	CiCo_mm9_circ_000374	193	-	exon	0.464609	1.16274	9.51296
chr1	72499015	72499171	CiCo_mm9_circ_000374	156	-	exon	0	1.14941	8.73218
chr1	73998994	74000524	CiCo_mm9_circ_000375	1530	-	exon	4.23883	3.27085	0.103323
chr1	74497068	74497129	CiCo_mm9_circ_000376	61	-	exon	14.5378	20.3742	4.25233
chr1	74499260	74499427	CiCo_mm9_circ_000376	167	-	exon	8.04769	9.93587	2.82477
chr1	74500401	74500657	CiCo_mm9_circ_000376	256	-	exon	7.71576	8.25046	3.69308
chr1	74568891	74569001	CiCo_mm9_circ_000377	110	+	exon	21.1125	15.4445	9.50071
chr1	74570077	74570187	CiCo_mm9_circ_000377	110	+	exon	22.7365	13.0059	7.60057
chr1	74573565	74573664	CiCo_mm9_circ_000377	99	+	exon	23.4349	10.8274	10.0185
chr1	74631957	74632271	CiCo_mm9_circ_000379	314	-	exon	1.4307	3.43727	4.35223
chr1	74641782	74641875	CiCo_mm9_circ_000380	93	-	exon	17.2597	11.0386	7.2923
chr1	74642204	74642342	CiCo_mm9_circ_000380	138	-	exon	11.672	10.7106	8.72493
chr1	74642439	74642511	CiCo_mm9_circ_000380	72	-	exon	12.3471	14.8321	13.0017
chr1	77395068	77395180	CiCo_mm9_circ_000384	112	-	exon	67.8	57.8899	20.9983
chr1	77396212	77396372	CiCo_mm9_circ_000384	160	-	exon	41.9879	40.911	19.9781
chr1	77397774	77397899	CiCo_mm9_circ_000384	125	-	exon	41.9879	40.911	19.9781
chr1	77396212	77396372	CiCo_mm9_circ_000385	160	-	exon	42.2056	41.1757	15.4839
chr1	77397774	77397899	CiCo_mm9_circ_000385	125	-	exon	42.2056	41.1757	15.4839
chr1	77465909	77466075	CiCo_mm9_circ_000386	166	-	exon	8.09588	7.56406	4.42039
chr1	77503122	77503786	CiCo_mm9_circ_000387	664	-	exon	45.677	46.8102	16.7305
chr1	78467657	78467766	CiCo_mm9_circ_000388	109	-	exon	4.097	8.20258	7.19031
chr1	78469058	78469209	CiCo_mm9_circ_000388	151	-	exon	11.2668	7.1233	9.71323
chr1	78472764	78472880	CiCo_mm9_circ_000388	116	-	exon	20.8002	10.0254	10.8162
chr1	80300654	80300768	CiCo_mm9_circ_000389	114	-	exon	14.1079	15.2996	11.4628
chr1	80319433	80319631	CiCo_mm9_circ_000389	198	-	exon	8.15283	11.1085	8.744
chr1	80319433	80319631	CiCo_mm9_circ_000390	198	-	exon	8.15283	11.1085	8.744
chr1	81188325	81188627	CiCo_mm9_circ_000391	302	+	exon	0	0.446675	3.65448
chr1	82871862	82872025	CiCo_mm9_circ_000393	163	+	exon	18.1367	9.07786	10.6101
chr1	82872745	82872899	CiCo_mm9_circ_000393	154	+	exon	14.5378	7.8586	12.2467
chr1	82872745	82872899	CiCo_mm9_circ_000394	154	+	exon	14.5378	7.8586	12.2467
chr1	82876582	82876702	CiCo_mm9_circ_000394	120	+	exon	8.93892	5.21983	3.05044
chr1	82878802	82879012	CiCo_mm9_circ_000394	210	+	exon	10.2522	6.84196	8.24671
chr1	82879755	82879936	CiCo_mm9_circ_000394	181	+	exon	11.8858	9.91521	12.7477
chr1	84759902	84760064	CiCo_mm9_circ_000395	162	-	exon	14.9302	20.2045	10.9987
chr1	84760413	84760506	CiCo_mm9_circ_000395	93	-	exon	20.1363	21.5972	11.7799
chr1	84765157	84765306	CiCo_mm9_circ_000396	149	-	exon	13.2197	19.2487	14.7641
chr1	84772891	84772987	CiCo_mm9_circ_000396	96	-	exon	29.735	29.7661	20.1131
chr1	84773998	84774082	CiCo_mm9_circ_000396	84	-	exon	27.5704	33.4376	23.5729
chr1	84779401	84779538	CiCo_mm9_circ_000396	137	-	exon	34.6167	33.3453	24.454
chr1	84782665	84782771	CiCo_mm9_circ_000396	106	-	exon	32.0102	35.8384	26.1181
chr1	84790099	84790902	CiCo_mm9_circ_000396	803	-	exon	16.3676	20.5932	13.8381
chr1	84790099	84790902	CiCo_mm9_circ_000398	803	-	exon	16.3676	20.5932	13.8381
chr1	84790099	84790902	CiCo_mm9_circ_000399	803	-	exon	16.3676	20.5932	13.8381
chr1	84811397	84811544	CiCo_mm9_circ_000399	147	-	exon	21.9245	29.8729	17.8138
chr1	87979721	87979850	CiCo_mm9_circ_000402	129	+	exon	17.3335	20.1279	11.7626
chr1	87981756	87981845	CiCo_mm9_circ_000402	89	+	exon	26.0387	22.0558	18.1622
chr1	88013149	88013264	CiCo_mm9_circ_000403	115	+	exon	12.4323	12.8342	9.0912
chr1	88015084	88015201	CiCo_mm9_circ_000403	117	+	exon	12.4323	12.8342	9.0912
chr1	88013149	88013264	CiCo_mm9_circ_000404	115	+	exon	14.5131	18.7339	8.0434
chr1	88015084	88015201	CiCo_mm9_circ_000404	117	+	exon	14.5131	18.7339	8.0434
chr1	88023030	88023133	CiCo_mm9_circ_000404	103	+	exon	20.8002	23.8585	10.6472
chr1	88024710	88024880	CiCo_mm9_circ_000404	170	+	exon	14.7588	13.7189	11.1008
chr1	88027211	88027304	CiCo_mm9_circ_000404	93	+	exon	13.4242	11.5185	11.2189
chr1	88056569	88056698	CiCo_mm9_circ_000405	129	+	exon	5.54671	6.24658	5.2729
chr1	88059239	88059410	CiCo_mm9_circ_000405	171	+	exon	4.19228	5.77042	3.67876
chr1	88061270	88061426	CiCo_mm9_circ_000405	156	+	exon	6.31513	5.45968	1.67927
chr1	88641255	88641403	CiCo_mm9_circ_000407	148	+	exon	7.25912	11.2029	4.9544
chr1	88641915	88642073	CiCo_mm9_circ_000407	158	+	exon	11.3376	9.9308	8.95397
chr1	88650801	88650855	CiCo_mm9_circ_000407	54	+	exon	24.582	11.4836	9.58708
chr1	88856317	88856430	CiCo_mm9_circ_000408	113	+	exon	4.7439	5.54034	2.77521
chr1	88869974	88870082	CiCo_mm9_circ_000408	108	+	exon	7.44226	5.79449	5.32127
chr1	88869974	88870082	CiCo_mm9_circ_000409	108	+	exon	7.44226	5.79449	5.32127
chr1	88886666	88886900	CiCo_mm9_circ_000409	234	+	exon	6.13679	5.18333	3.59006
chr1	88886666	88886900	CiCo_mm9_circ_000410	234	+	exon	6.13679	5.18333	3.59006
chr1	89116155	89116270	CiCo_mm9_circ_000411	115	+	exon	21.7565	23.3349	15.455
chr1	89117494	89117629	CiCo_mm9_circ_000411	135	+	exon	19.2198	26.8695	13.57
chr1	89120927	89121032	CiCo_mm9_circ_000411	105	+	exon	13.6051	21.2803	15.4207
chr1	89122424	89122577	CiCo_mm9_circ_000411	153	+	exon	10.5352	10.5462	11.9839
chr1	89122671	89122808	CiCo_mm9_circ_000411	137	+	exon	12.4098	11.442	10.6986
chr1	89260678	89260808	CiCo_mm9_circ_000412	130	+	exon	35.7784	32.372	30.9934
chr1	89261758	89261854	CiCo_mm9_circ_000412	96	+	exon	35.7784	32.372	30.9934
chr1	89260678	89260808	CiCo_mm9_circ_000413	130	+	exon	35.7784	32.372	30.9934
chr1	89261758	89261854	CiCo_mm9_circ_000413	96	+	exon	35.7784	32.372	30.9934
chr1	89270571	89270686	CiCo_mm9_circ_000413	115	+	exon	35.7784	32.372	30.9934
chr1	89260678	89260808	CiCo_mm9_circ_000414	130	+	exon	59.4699	53.4859	53.2726
chr1	89261758	89261854	CiCo_mm9_circ_000414	96	+	exon	59.4699	53.4859	53.2726
chr1	89270571	89270686	CiCo_mm9_circ_000414	115	+	exon	59.4699	53.4859	53.2726
chr1	89275546	89275658	CiCo_mm9_circ_000414	112	+	exon	59.4699	53.4859	53.2726
chr1	89276542	89276583	CiCo_mm9_circ_000414	41	+	exon	59.4699	53.4859	53.2726
chr1	89260678	89260808	CiCo_mm9_circ_000415	130	+	exon	46.6211	38.1137	45.0014
chr1	89261758	89261854	CiCo_mm9_circ_000415	96	+	exon	46.6211	38.1137	45.0014
chr1	89270571	89270686	CiCo_mm9_circ_000415	115	+	exon	46.6211	38.1137	45.0014
chr1	89275546	89275658	CiCo_mm9_circ_000415	112	+	exon	46.6211	38.1137	45.0014
chr1	89276542	89276583	CiCo_mm9_circ_000415	41	+	exon	35.0965	23.9544	27.531
chr1	89300241	89300421	CiCo_mm9_circ_000415	180	+	exon	35.0965	23.9544	27.531
chr1	89260678	89260808	CiCo_mm9_circ_000416	130	+	exon	35.0965	23.9544	27.531
chr1	89261758	89261854	CiCo_mm9_circ_000416	96	+	exon	35.0965	23.9544	27.531
chr1	89270571	89270686	CiCo_mm9_circ_000416	115	+	exon	42.921	42.9659	37.6635
chr1	89275546	89275658	CiCo_mm9_circ_000416	112	+	exon	42.921	42.9659	37.6635
chr1	89276542	89276583	CiCo_mm9_circ_000416	41	+	exon	42.921	42.9659	37.6635
chr1	89300241	89300421	CiCo_mm9_circ_000416	180	+	exon	42.921	42.9659	37.6635
chr1	89303558	89303776	CiCo_mm9_circ_000416	218	+	exon	10.9555	16.4505	11.9441
chr1	89303867	89304030	CiCo_mm9_circ_000416	163	+	exon	10.9555	16.4505	11.9441
chr1	89275546	89275658	CiCo_mm9_circ_000417	112	+	exon	11.1124	16.0681	12.5201
chr1	89276542	89276583	CiCo_mm9_circ_000417	41	+	exon	13.1904	13.4792	9.0025
chr1	89776942	89777053	CiCo_mm9_circ_000418	111	+	exon	28.1669	21.3487	15.5362
chr1	89778433	89778514	CiCo_mm9_circ_000418	81	+	exon	34.0751	25.308	27.0075
chr1	89811674	89811779	CiCo_mm9_circ_000419	105	+	exon	11.0542	17.0242	15.9182
chr1	89812066	89812199	CiCo_mm9_circ_000419	133	+	exon	12.1076	16.497	13.7725
chr1	89812943	89813050	CiCo_mm9_circ_000419	107	+	exon	15.8569	17.9621	21.4822
chr1	89813381	89813507	CiCo_mm9_circ_000419	126	+	exon	19.8721	19.8929	17.8531
chr1	89814466	89814569	CiCo_mm9_circ_000419	103	+	exon	22.5335	19.9544	17.7453
chr1	89815133	89815296	CiCo_mm9_circ_000419	163	+	exon	14.2896	12.9291	13.1822
chr1	89830680	89830777	CiCo_mm9_circ_000420	97	+	exon	11.9566	17.0329	12.9132
chr1	89830968	89831076	CiCo_mm9_circ_000420	108	+	exon	8.26918	14.4862	14.0288
chr1	89853785	89853909	CiCo_mm9_circ_000421	124	-	exon	7.9318	3.60914	1.68733
chr1	89856363	89856438	CiCo_mm9_circ_000421	75	-	exon	13.0457	8.31051	0.693802
chr1	89858998	89859063	CiCo_mm9_circ_000421	65	-	exon	9.55968	10.9368	0.798924
chr1	91034133	91034378	CiCo_mm9_circ_000423	245	+	exon	1.83199	2.93426	6.64471
chr1	91040124	91042481	CiCo_mm9_circ_000423	2357	+	exon	2.14059	2.75507	6.12711
chr1	91501172	91501231	CiCo_mm9_circ_000425	59	+	exon	27.0402	36.0914	41.3043
chr1	91506070	91506158	CiCo_mm9_circ_000425	88	+	exon	19.2421	26.3589	28.4381
chr1	91524335	91524421	CiCo_mm9_circ_000425	86	+	exon	17.6124	21.2607	33.9405
chr1	91526962	91527104	CiCo_mm9_circ_000425	142	+	exon	17.6124	21.2607	33.9405
chr1	91530734	91530869	CiCo_mm9_circ_000425	135	+	exon	11.9759	12.6194	30.2362
chr1	91524335	91524421	CiCo_mm9_circ_000426	86	+	exon	11.9759	12.6194	30.2362
chr1	91526962	91527104	CiCo_mm9_circ_000426	142	+	exon	11.9295	13.9323	27.5276
chr1	91530734	91530869	CiCo_mm9_circ_000426	135	+	exon	11.9295	13.9323	27.5276
chr1	91560235	91560363	CiCo_mm9_circ_000427	128	+	exon	12.5769	11.1911	23.7076
chr1	91561608	91561764	CiCo_mm9_circ_000427	156	+	exon	12.5769	11.1911	23.7076
chr1	91567753	91567846	CiCo_mm9_circ_000427	93	+	exon	13.7785	13.2182	27.2041
chr1	91560235	91560363	CiCo_mm9_circ_000428	128	+	exon	13.7785	13.2182	27.2041
chr1	91561608	91561764	CiCo_mm9_circ_000428	156	+	exon	17.2597	11.9985	25.8035
chr1	91567753	91567846	CiCo_mm9_circ_000428	93	+	exon	17.2597	11.9985	25.8035
chr1	91622535	91622640	CiCo_mm9_circ_000428	105	+	exon	8.50322	11.4914	16.4156
chr1	91640302	91640471	CiCo_mm9_circ_000428	169	+	exon	6.36241	10.3497	12.4068
chr1	91662880	91663039	CiCo_mm9_circ_000429	159	+	exon	4.5067	8.74088	12.1936
chr1	91685737	91685899	CiCo_mm9_circ_000429	162	+	exon	7.74158	9.13355	16.8215
chr1	91731008	91731163	CiCo_mm9_circ_000430	155	+	exon	5.77783	13.3029	19.6044
chr1	91734286	91734377	CiCo_mm9_circ_000430	91	+	exon	7.83775	15.6919	30.3765
chr1	91739595	91739818	CiCo_mm9_circ_000430	223	+	exon	8.45007	8.05611	23.0689
chr1	93281141	93281235	CiCo_mm9_circ_000431	94	-	exon	37.9512	27.5434	16.6512
chr1	93281816	93281923	CiCo_mm9_circ_000431	107	-	exon	35.0521	21.3039	14.6469
chr1	93287183	93287240	CiCo_mm9_circ_000432	57	-	exon	26.4186	37.3359	18.1824
chr1	93287708	93287774	CiCo_mm9_circ_000432	66	-	exon	28.251	29.6272	13.379
chr1	94968935	94969600	CiCo_mm9_circ_000435	665	-	exon	5.00745	3.38695	3.64194
chr1	95210857	95211057	CiCo_mm9_circ_000436	200	-	exon	5.38114	5.16232	0.262333
chr1	95393917	95394041	CiCo_mm9_circ_000437	124	+	exon	17.3057	12.632	13.0768
chr1	95395588	95395723	CiCo_mm9_circ_000437	135	+	exon	13.255	12.2737	9.30511
chr1	95395849	95395967	CiCo_mm9_circ_000437	118	+	exon	9.84658	14.4062	11.5206
chr1	95397034	95397136	CiCo_mm9_circ_000437	102	+	exon	17.5018	15.3301	12.2864
chr1	95611474	95611578	CiCo_mm9_circ_000439	104	-	exon	12.0179	3.00761	4.01744
chr1	95613208	95613318	CiCo_mm9_circ_000439	110	-	exon	8.93221	4.47078	4.27532
chr1	95621733	95621893	CiCo_mm9_circ_000439	160	-	exon	8.39759	5.32404	2.94758
chr1	95646423	95647562	CiCo_mm9_circ_000440	1139	-	exon	4.42764	3.71994	3.42276
chr1	9680161	9680254	CiCo_mm9_circ_000441	93	-	exon	3.83549	4.79938	0
chr1	9682798	9682870	CiCo_mm9_circ_000441	72	-	exon	7.40828	6.79803	0.722314
chr1	9683367	9683473	CiCo_mm9_circ_000441	106	-	exon	4.21187	4.21628	0.492794
chr1	99819670	99819754	CiCo_mm9_circ_000442	84	-	exon	6.36241	30.7838	13.6475
chr1	99821007	99821093	CiCo_mm9_circ_000442	86	-	exon	2.07205	23.8535	13.3338
chr1	99831227	99831315	CiCo_mm9_circ_000442	88	-	exon	4.05097	28.3865	17.7738
chr10	107677160	107677235	CiCo_mm9_circ_000447	75	+	exon	22.5335	20.1827	9.71323
chr10	107677834	107677923	CiCo_mm9_circ_000447	89	+	exon	33.0492	21.5546	9.37404
chr10	107678176	107678334	CiCo_mm9_circ_000447	158	+	exon	19.274	14.1869	9.2856
chr10	107680061	107680186	CiCo_mm9_circ_000447	125	+	exon	17.1684	13.9639	9.20664
chr10	107705627	107705763	CiCo_mm9_circ_000448	136	+	exon	7.23704	8.56182	4.61859
chr10	107706309	107706414	CiCo_mm9_circ_000448	105	+	exon	14.4555	7.6609	3.97954
chr10	107708777	107708825	CiCo_mm9_circ_000448	48	+	exon	33.1105	22.0968	8.60881
chr10	107710450	107710481	CiCo_mm9_circ_000448	31	+	exon	0	8.45891	4.94334
chr10	107711193	107711244	CiCo_mm9_circ_000448	51	+	exon	36.4003	20.8219	10.1402
chr10	108064308	108064476	CiCo_mm9_circ_000450	168	-	exon	0	0.800844	14.3523
chr10	108068851	108069019	CiCo_mm9_circ_000450	168	-	exon	0.533338	0.800844	10.6082
chr10	108073606	108073729	CiCo_mm9_circ_000450	123	-	exon	0.726888	0.727648	15.7336
chr10	108079269	108079454	CiCo_mm9_circ_000450	185	-	exon	0.484592	0.727648	10.2056
chr10	10898531	10898620	CiCo_mm9_circ_000451	89	+	exon	18.0268	11.5292	7.6164
chr10	10901309	10901402	CiCo_mm9_circ_000451	93	+	exon	14.3831	8.63889	6.17041
chr10	10903571	10903679	CiCo_mm9_circ_000451	108	+	exon	6.61535	5.38059	3.38626
chr10	10905117	10905260	CiCo_mm9_circ_000451	143	+	exon	3.75559	4.3861	3.29556
chr10	10906178	10906352	CiCo_mm9_circ_000451	174	+	exon	4.12042	4.38252	3.6157
chr10	10906640	10906703	CiCo_mm9_circ_000451	63	+	exon	11.2668	4.93437	7.41501
chr10	10907737	10907963	CiCo_mm9_circ_000451	226	+	exon	6.35306	3.57734	3.48429
chr10	10909428	10909572	CiCo_mm9_circ_000451	144	+	exon	6.83776	7.77831	5.09107
chr10	10910783	10910885	CiCo_mm9_circ_000451	102	+	exon	5.25053	8.76004	8.19091
chr10	10912283	10912355	CiCo_mm9_circ_000451	72	+	exon	6.17357	9.27004	8.66777
chr10	10913978	10914167	CiCo_mm9_circ_000451	189	+	exon	6.64146	5.22375	3.88529
chr10	109201573	109202062	CiCo_mm9_circ_000452	489	-	exon	0.551841	0.920698	5.81095
chr10	109253309	109253429	CiCo_mm9_circ_000453	120	-	exon	0	0.745689	20.9173
chr10	109260291	109260675	CiCo_mm9_circ_000453	384	-	exon	0	0.745689	20.9173
chr10	109261628	109261737	CiCo_mm9_circ_000453	109	-	exon	0	1.7577	12.6002
chr10	109253309	109253429	CiCo_mm9_circ_000454	120	-	exon	0	1.7577	12.6002
chr10	109260291	109260675	CiCo_mm9_circ_000454	384	-	exon	0	2.8709	21.0916
chr10	109261628	109261737	CiCo_mm9_circ_000454	109	-	exon	0	2.8709	21.0916
chr10	109278758	109278874	CiCo_mm9_circ_000454	116	-	exon	0	0.771183	13.5202
chr10	109317590	109317774	CiCo_mm9_circ_000455	184	-	exon	0.974423	0.731582	11.1158
chr10	109320669	109320742	CiCo_mm9_circ_000455	73	-	exon	2.43606	1.82895	22.8017
chr10	109340117	109340170	CiCo_mm9_circ_000455	53	-	exon	6.6766	2.50634	29.2939
chr10	109340801	109340919	CiCo_mm9_circ_000455	118	-	exon	3.02972	3.412	18.6102
chr10	109653757	109654166	CiCo_mm9_circ_000457	409	-	exon	1.53887	1.98062	12.9893
chr10	114843408	114843618	CiCo_mm9_circ_000460	210	+	exon	4.27176	3.20717	1.9992
chr10	114843789	114843954	CiCo_mm9_circ_000460	165	+	exon	5.97274	3.80481	3.49409
chr10	114860439	114860638	CiCo_mm9_circ_000461	199	+	exon	5.85872	2.70685	1.58187
chr10	114861613	114861708	CiCo_mm9_circ_000461	95	+	exon	8.45007	4.22946	2.7463
chr10	114864091	114864202	CiCo_mm9_circ_000461	111	+	exon	4.82861	4.43086	2.35397
chr10	114864453	114864558	CiCo_mm9_circ_000461	105	+	exon	3.40129	4.25606	2.48721
chr10	115954372	115954439	CiCo_mm9_circ_000462	67	-	exon	33.1375	30.5184	23.2628
chr10	115964882	115965005	CiCo_mm9_circ_000462	123	-	exon	33.1375	30.5184	23.2628
chr10	115954372	115954439	CiCo_mm9_circ_000463	67	-	exon	31.2562	25.8315	17.8598
chr10	115964882	115965005	CiCo_mm9_circ_000463	123	-	exon	31.2562	25.8315	17.8598
chr10	115986088	115986231	CiCo_mm9_circ_000463	143	-	exon	31.2562	25.8315	17.8598
chr10	115964882	115965005	CiCo_mm9_circ_000464	123	-	exon	21.9076	21.6172	10.2529
chr10	115986088	115986231	CiCo_mm9_circ_000464	143	-	exon	21.9076	21.6172	10.2529
chr10	116351152	116351265	CiCo_mm9_circ_000465	113	-	exon	7.9065	3.56165	3.23774
chr10	116352899	116353028	CiCo_mm9_circ_000465	129	-	exon	4.16004	3.47032	3.24486
chr10	116355817	116356021	CiCo_mm9_circ_000465	204	-	exon	4.83646	4.62146	7.45922
chr10	116356629	116356707	CiCo_mm9_circ_000465	78	-	exon	6.84563	7.99492	11.3467
chr10	116374452	116374711	CiCo_mm9_circ_000465	259	-	exon	5.20004	4.85845	4.05607
chr10	116376256	116376537	CiCo_mm9_circ_000465	281	-	exon	5.20004	4.85845	4.05607
chr10	116374452	116374711	CiCo_mm9_circ_000466	259	-	exon	7.99061	3.83951	5.42248
chr10	116376256	116376537	CiCo_mm9_circ_000466	281	-	exon	7.99061	3.83951	5.42248
chr10	116513866	116514030	CiCo_mm9_circ_000467	164	-	exon	6.00894	5.74181	7.03053
chr10	116514567	116514726	CiCo_mm9_circ_000467	159	-	exon	5.63338	7.61302	7.57979
chr10	116515815	116516002	CiCo_mm9_circ_000467	187	-	exon	7.67099	7.67901	3.64615
chr10	116518077	116518169	CiCo_mm9_circ_000467	92	-	exon	5.8151	5.33609	4.53582
chr10	116536998	116537023	CiCo_mm9_circ_000469	25	-	exon	17.3335	13.8813	18.2523
chr10	116537681	116537724	CiCo_mm9_circ_000469	43	-	exon	12.291	5.12661	9.58708
chr10	116539168	116539254	CiCo_mm9_circ_000469	86	-	exon	11.3963	9.85253	10.9094
chr10	116792990	116793180	CiCo_mm9_circ_000471	190	-	exon	35.8649	39.4454	22.9136
chr10	116792990	116793180	CiCo_mm9_circ_000472	190	-	exon	35.8649	39.4454	22.9136
chr10	116796048	116796202	CiCo_mm9_circ_000472	154	-	exon	35.8649	39.4454	22.9136
chr10	116797495	116797611	CiCo_mm9_circ_000472	116	-	exon	35.8649	39.4454	22.9136
chr10	116792990	116793180	CiCo_mm9_circ_000474	190	-	exon	41.8687	29.9791	21.0916
chr10	116796048	116796202	CiCo_mm9_circ_000474	154	-	exon	41.8687	29.9791	21.0916
chr10	116797495	116797611	CiCo_mm9_circ_000474	116	-	exon	41.8687	29.9791	21.0916
chr10	116797911	116798416	CiCo_mm9_circ_000474	505	-	exon	43.1411	29.305	22.5337
chr10	116799069	116799243	CiCo_mm9_circ_000474	174	-	exon	43.1411	29.305	22.5337
chr10	116800030	116800176	CiCo_mm9_circ_000474	146	-	exon	43.1411	29.305	22.5337
chr10	116792990	116793180	CiCo_mm9_circ_000475	190	-	exon	41.5044	39.0514	24.6972
chr10	116796048	116796202	CiCo_mm9_circ_000475	154	-	exon	41.5044	39.0514	24.6972
chr10	116797495	116797611	CiCo_mm9_circ_000475	116	-	exon	69.017	56.715	42.4845
chr10	116797911	116798416	CiCo_mm9_circ_000475	505	-	exon	69.017	56.715	42.4845
chr10	116799069	116799243	CiCo_mm9_circ_000475	174	-	exon	45.9868	36.2141	35.5113
chr10	116800030	116800176	CiCo_mm9_circ_000475	146	-	exon	45.9868	36.2141	35.5113
chr10	116803136	116803240	CiCo_mm9_circ_000475	104	-	exon	43.7794	46.8328	45.1962
chr10	116804834	116805044	CiCo_mm9_circ_000475	210	-	exon	43.7794	46.8328	45.1962
chr10	116803136	116803240	CiCo_mm9_circ_000476	104	-	exon	31.1838	38.9137	29.7381
chr10	116804834	116805044	CiCo_mm9_circ_000476	210	-	exon	31.1838	38.9137	29.7381
chr10	117129637	117129793	CiCo_mm9_circ_000478	156	-	exon	13.2044	12.0688	6.71706
chr10	117131960	117132124	CiCo_mm9_circ_000478	164	-	exon	13.2044	12.0688	6.71706
chr10	117129637	117129793	CiCo_mm9_circ_000479	156	-	exon	9.83281	7.38232	6.07182
chr10	117131960	117132124	CiCo_mm9_circ_000479	164	-	exon	9.83281	7.38232	6.07182
chr10	117133008	117133105	CiCo_mm9_circ_000479	97	-	exon	9.19736	13.3501	10.761
chr10	117133436	117133495	CiCo_mm9_circ_000479	59	-	exon	16.5246	22.5571	16.6975
chr10	117138620	117138670	CiCo_mm9_circ_000479	50	-	exon	22.9754	14.1535	12.4068
chr10	117139257	117139391	CiCo_mm9_circ_000479	134	-	exon	10.0149	6.68359	7.03053
chr10	117142210	117142285	CiCo_mm9_circ_000479	75	-	exon	16.6036	13.0594	10.407
chr10	117198300	117198403	CiCo_mm9_circ_000480	103	-	exon	5.20004	8.24202	5.5771
chr10	117199078	117199191	CiCo_mm9_circ_000480	113	-	exon	4.7439	8.31051	5.55042
chr10	117200786	117200937	CiCo_mm9_circ_000480	151	-	exon	6.52286	5.04567	3.12211
chr10	117201372	117201411	CiCo_mm9_circ_000480	39	-	exon	13.5201	12.4064	7.90934
chr10	117202966	117203085	CiCo_mm9_circ_000480	119	-	exon	9.76453	12.0305	4.83349
chr10	117203389	117203459	CiCo_mm9_circ_000480	70	-	exon	9.76453	12.0305	4.83349
chr10	117207243	117207292	CiCo_mm9_circ_000480	49	-	exon	12.6949	15.8853	7.42661
chr10	117207431	117207577	CiCo_mm9_circ_000480	146	-	exon	12.6949	15.8853	7.42661
chr10	117208389	117208449	CiCo_mm9_circ_000480	60	-	exon	7.21073	21.6548	12.6549
chr10	117210110	117210187	CiCo_mm9_circ_000480	77	-	exon	7.21073	21.6548	12.6549
chr10	117210331	117210422	CiCo_mm9_circ_000480	91	-	exon	6.74473	12.276	5.73921
chr10	117211511	117211625	CiCo_mm9_circ_000480	114	-	exon	6.74473	12.276	5.73921
chr10	117213266	117213345	CiCo_mm9_circ_000480	79	-	exon	13.2985	11.8332	3.45764
chr10	117214184	117214273	CiCo_mm9_circ_000480	89	-	exon	13.2985	11.8332	3.45764
chr10	117214648	117214720	CiCo_mm9_circ_000480	72	-	exon	5.77783	8.67581	2.70405
chr10	117202966	117203085	CiCo_mm9_circ_000481	119	-	exon	5.77783	8.67581	2.70405
chr10	117203389	117203459	CiCo_mm9_circ_000481	70	-	exon	11.7566	10.7882	4.58513
chr10	117207243	117207292	CiCo_mm9_circ_000481	49	-	exon	11.7566	10.7882	4.58513
chr10	117207431	117207577	CiCo_mm9_circ_000481	146	-	exon	18.8106	8.63054	5.96066
chr10	117208389	117208449	CiCo_mm9_circ_000481	60	-	exon	18.8106	8.63054	5.96066
chr10	117210110	117210187	CiCo_mm9_circ_000481	77	-	exon	16.9001	7.89499	5.2729
chr10	117210331	117210422	CiCo_mm9_circ_000481	91	-	exon	16.9001	7.89499	5.2729
chr10	117211511	117211625	CiCo_mm9_circ_000481	114	-	exon	13.0194	8.52157	3.51526
chr10	117213266	117213345	CiCo_mm9_circ_000481	79	-	exon	13.0194	8.52157	3.51526
chr10	117214184	117214273	CiCo_mm9_circ_000481	89	-	exon	13.0194	8.52157	3.51526
chr10	117214648	117214720	CiCo_mm9_circ_000481	72	-	exon	14.8166	11.1241	5.77852
chr10	117214184	117214273	CiCo_mm9_circ_000482	89	-	exon	14.8166	11.1241	5.77852
chr10	117214648	117214720	CiCo_mm9_circ_000482	72	-	exon	14.8166	11.1241	5.77852
chr10	117222050	117222195	CiCo_mm9_circ_000483	145	-	exon	11.7298	8.03404	4.69504
chr10	117224848	117224967	CiCo_mm9_circ_000483	119	-	exon	12.769	12.0305	6.59112
chr10	119334770	119334851	CiCo_mm9_circ_000484	81	+	exon	6.59518	6.60208	22.5063
chr10	119366956	119367092	CiCo_mm9_circ_000484	136	+	exon	1.97374	5.92741	15.3953
chr10	119368299	119368445	CiCo_mm9_circ_000484	146	+	exon	1.97374	5.92741	15.3953
chr10	119375299	119375383	CiCo_mm9_circ_000484	84	+	exon	3.67894	5.21729	8.25011
chr10	119379917	119379993	CiCo_mm9_circ_000484	76	+	exon	3.67894	5.21729	8.25011
chr10	119382081	119382227	CiCo_mm9_circ_000484	146	+	exon	7.42281	9.5536	10.5458
chr10	119366956	119367092	CiCo_mm9_circ_000485	136	+	exon	7.42281	9.5536	10.5458
chr10	119368299	119368445	CiCo_mm9_circ_000485	146	+	exon	8.19401	8.20258	12.3262
chr10	119375299	119375383	CiCo_mm9_circ_000485	84	+	exon	8.19401	8.20258	12.3262
chr10	119379917	119379993	CiCo_mm9_circ_000485	76	+	exon	4.2921	3.06899	8.60881
chr10	119382081	119382227	CiCo_mm9_circ_000485	146	+	exon	4.2921	3.06899	8.60881
chr10	119472406	119472551	CiCo_mm9_circ_000486	145	+	exon	1.85207	3.09001	6.13967
chr10	119475346	119475486	CiCo_mm9_circ_000486	140	+	exon	3.19624	2.87963	8.97514
chr10	119475654	119475849	CiCo_mm9_circ_000486	195	+	exon	1.3796	3.22244	7.26368
chr10	120998632	120998829	CiCo_mm9_circ_000487	197	-	exon	4.55223	2.96204	2.13046
chr10	121000981	121001161	CiCo_mm9_circ_000487	180	-	exon	9.46159	3.988	2.9132
chr10	121005084	121005195	CiCo_mm9_circ_000487	111	-	exon	8.04769	6.44489	5.17874
chr10	121007686	121007847	CiCo_mm9_circ_000487	161	-	exon	6.12022	5.56966	3.90585
chr10	121008898	121009080	CiCo_mm9_circ_000487	182	-	exon	5.4179	6.16314	1.72882
chr10	121306772	121306901	CiCo_mm9_circ_000488	129	-	exon	4.16004	2.42923	12.5738
chr10	121307383	121307566	CiCo_mm9_circ_000488	183	-	exon	0.979718	1.47112	9.74339
chr10	121362871	121363034	CiCo_mm9_circ_000489	163	-	exon	4.39679	2.47578	13.8253
chr10	121368369	121368565	CiCo_mm9_circ_000489	196	-	exon	4.57533	2.51907	12.8477
chr10	122600648	122600710	CiCo_mm9_circ_000491	62	-	exon	5.7228	6.44489	8.36968
chr10	122605282	122605428	CiCo_mm9_circ_000491	146	-	exon	4.90526	4.60349	6.09791
chr10	122608155	122608282	CiCo_mm9_circ_000491	127	-	exon	4.92921	7.04909	6.17917
chr10	122612898	122613029	CiCo_mm9_circ_000491	131	-	exon	4.77984	7.86081	9.18762
chr10	122618728	122618856	CiCo_mm9_circ_000491	128	-	exon	6.98714	7.34417	8.99253
chr10	126908823	126909056	CiCo_mm9_circ_000495	233	+	exon	10.4001	16.7732	16.4496
chr10	126913575	126913754	CiCo_mm9_circ_000495	179	+	exon	10.0149	13.5343	21.3845
chr10	127000659	127000849	CiCo_mm9_circ_000497	190	-	exon	14.6291	19.3684	37.2692
chr10	127125288	127125404	CiCo_mm9_circ_000498	116	+	exon	5.39264	4.24151	0.90135
chr10	127126280	127126500	CiCo_mm9_circ_000498	220	+	exon	4.07847	3.06205	0.715778
chr10	127127916	127127989	CiCo_mm9_circ_000498	73	+	exon	8.5262	5.48686	1.42511
chr10	127130023	127130117	CiCo_mm9_circ_000498	94	+	exon	5.69268	3.3242	1.66512
chr10	127455031	127455138	CiCo_mm9_circ_000499	107	+	exon	14.1878	12.5317	4.39408
chr10	127455203	127455277	CiCo_mm9_circ_000499	74	+	exon	14.1878	12.5317	4.39408
chr10	127455031	127455138	CiCo_mm9_circ_000500	107	+	exon	13.2197	15.0381	5.62442
chr10	127455203	127455277	CiCo_mm9_circ_000500	74	+	exon	13.2197	15.0381	5.62442
chr10	127457185	127457322	CiCo_mm9_circ_000500	137	+	exon	15.6755	8.17286	0.764188
chr10	127522146	127522268	CiCo_mm9_circ_000501	122	+	exon	182.467	256.748	182.622
chr10	127522497	127522682	CiCo_mm9_circ_000501	185	+	exon	126.478	151.593	113.112
chr10	127523093	127523252	CiCo_mm9_circ_000501	159	+	exon	123.371	129.703	103.151
chr10	127523353	127523476	CiCo_mm9_circ_000501	123	+	exon	146.831	157.9	105.033
chr10	127678330	127678432	CiCo_mm9_circ_000504	102	+	exon	16.6267	14.8921	0
chr10	127678639	127678795	CiCo_mm9_circ_000504	156	+	exon	21.8159	16.9537	1.34341
chr10	127679365	127679499	CiCo_mm9_circ_000504	134	+	exon	29.377	19.7166	1.56234
chr10	127679686	127679774	CiCo_mm9_circ_000504	88	+	exon	29.377	19.7166	1.56234
chr10	127680250	127680427	CiCo_mm9_circ_000504	177	+	exon	22.2803	16.2208	1.18492
chr10	127679365	127679499	CiCo_mm9_circ_000505	134	+	exon	22.2803	16.2208	1.18492
chr10	127679686	127679774	CiCo_mm9_circ_000505	88	+	exon	16.7103	9.88457	0.88869
chr10	127795389	127795589	CiCo_mm9_circ_000506	200	+	exon	25.5604	29.8517	22.036
chr10	17809253	17809377	CiCo_mm9_circ_000514	124	+	exon	10.8161	13.7147	13.9204
chr10	17812650	17812847	CiCo_mm9_circ_000514	197	+	exon	14.1119	15.2659	14.9132
chr10	17812975	17813129	CiCo_mm9_circ_000514	154	+	exon	14.1119	15.2659	14.9132
chr10	17813584	17813709	CiCo_mm9_circ_000514	125	+	exon	14.1119	15.2659	14.9132
chr10	17814215	17814378	CiCo_mm9_circ_000514	163	+	exon	17.4453	15.7172	10.886
chr10	17814650	17814714	CiCo_mm9_circ_000514	64	+	exon	17.4453	15.7172	10.886
chr10	17815987	17816142	CiCo_mm9_circ_000514	155	+	exon	17.4453	15.7172	10.886
chr10	17812650	17812847	CiCo_mm9_circ_000515	197	+	exon	17.1684	15.7542	9.62513
chr10	17812975	17813129	CiCo_mm9_circ_000515	154	+	exon	17.1684	15.7542	9.62513
chr10	17813584	17813709	CiCo_mm9_circ_000515	125	+	exon	17.1684	15.7542	9.62513
chr10	17814215	17814378	CiCo_mm9_circ_000515	163	+	exon	13.74	13.2042	12.2177
chr10	17814650	17814714	CiCo_mm9_circ_000515	64	+	exon	13.74	13.2042	12.2177
chr10	17812650	17812847	CiCo_mm9_circ_000516	197	+	exon	13.74	13.2042	12.2177
chr10	17812975	17813129	CiCo_mm9_circ_000516	154	+	exon	19.4135	20.1279	18.6579
chr10	17813584	17813709	CiCo_mm9_circ_000516	125	+	exon	19.4135	20.1279	18.6579
chr10	17814215	17814378	CiCo_mm9_circ_000516	163	+	exon	19.4135	20.1279	18.6579
chr10	17814650	17814714	CiCo_mm9_circ_000516	64	+	exon	11.5557	12.4353	9.80218
chr10	17815987	17816142	CiCo_mm9_circ_000516	155	+	exon	11.5557	12.4353	9.80218
chr10	20706775	20706906	CiCo_mm9_circ_000523	131	+	exon	4.097	4.10129	8.78816
chr10	20708349	20708490	CiCo_mm9_circ_000523	141	+	exon	1.90424	5.7187	5.94129
chr10	21056772	21056881	CiCo_mm9_circ_000524	109	+	exon	17.2074	18.4558	10.5458
chr10	21061519	21061785	CiCo_mm9_circ_000524	266	+	exon	13.5032	13.6863	9.28188
chr10	21062204	21062370	CiCo_mm9_circ_000524	166	+	exon	12.9534	10.5357	6.63059
chr10	21064882	21065000	CiCo_mm9_circ_000524	118	+	exon	15.1486	12.5107	10.6344
chr10	21067067	21067214	CiCo_mm9_circ_000524	147	+	exon	10.3532	10.6689	14.2511
chr10	21069117	21069192	CiCo_mm9_circ_000524	75	+	exon	9.4878	8.31051	20.1203
chr10	21071732	21071850	CiCo_mm9_circ_000524	118	+	exon	13.6337	8.34044	13.293
chr10	21072347	21072416	CiCo_mm9_circ_000524	69	+	exon	28.3279	18.6902	18.0785
chr10	23525698	23525846	CiCo_mm9_circ_000526	148	+	exon	4.83941	2.42224	3.89274
chr10	24959431	24959544	CiCo_mm9_circ_000527	113	-	exon	2.37195	3.56165	1.3876
chr10	24959431	24959544	CiCo_mm9_circ_000528	113	-	exon	2.37195	3.56165	1.3876
chr10	24987113	24987274	CiCo_mm9_circ_000528	161	-	exon	5.00745	5.29117	1.30195
chr10	24991310	24991447	CiCo_mm9_circ_000528	137	-	exon	5.00745	5.29117	1.30195
chr10	25003698	25003847	CiCo_mm9_circ_000528	149	-	exon	5.00745	5.29117	1.30195
chr10	24987113	24987274	CiCo_mm9_circ_000529	161	-	exon	5.00745	5.29117	1.30195
chr10	24991310	24991447	CiCo_mm9_circ_000529	137	-	exon	3.91887	4.24989	1.52838
chr10	24987113	24987274	CiCo_mm9_circ_000530	161	-	exon	3.91887	4.24989	1.52838
chr10	24991310	24991447	CiCo_mm9_circ_000530	137	-	exon	3.91887	4.24989	1.52838
chr10	25003698	25003847	CiCo_mm9_circ_000530	149	-	exon	3.91887	4.24989	1.52838
chr10	24987113	24987274	CiCo_mm9_circ_000531	161	-	exon	1.80268	4.51142	2.10916
chr10	24991310	24991447	CiCo_mm9_circ_000531	137	-	exon	1.80268	4.51142	2.10916
chr10	25003698	25003847	CiCo_mm9_circ_000531	149	-	exon	1.80268	4.51142	2.10916
chr10	26022458	26022561	CiCo_mm9_circ_000532	103	-	exon	6.06672	5.20549	5.5771
chr10	26023428	26023543	CiCo_mm9_circ_000532	115	-	exon	6.21614	7.00048	6.36384
chr10	26047492	26047644	CiCo_mm9_circ_000533	152	-	exon	4.12378	3.53837	3.44634
chr10	26049980	26050072	CiCo_mm9_circ_000533	92	-	exon	7.75347	6.30629	6.23676
chr10	26051625	26051761	CiCo_mm9_circ_000533	136	-	exon	7.75347	6.30629	6.23676
chr10	26056038	26056143	CiCo_mm9_circ_000533	105	-	exon	3.94748	4.28091	1.92441
chr10	26057573	26057665	CiCo_mm9_circ_000533	92	-	exon	3.94748	4.28091	1.92441
chr10	26059024	26059109	CiCo_mm9_circ_000533	85	-	exon	9.35354	4.25606	4.97443
chr10	26060713	26060846	CiCo_mm9_circ_000533	133	-	exon	9.35354	4.25606	4.97443
chr10	26062313	26062473	CiCo_mm9_circ_000533	160	-	exon	14.5378	7.27648	8.50467
chr10	26063982	26064057	CiCo_mm9_circ_000533	75	-	exon	14.5378	7.27648	8.50467
chr10	26064417	26064529	CiCo_mm9_circ_000533	112	-	exon	23.0576	8.91792	9.19691
chr10	26072064	26072181	CiCo_mm9_circ_000533	117	-	exon	23.0576	8.91792	9.19691
chr10	26049980	26050072	CiCo_mm9_circ_000534	92	-	exon	16.8161	7.07014	6.29599
chr10	26051625	26051761	CiCo_mm9_circ_000534	136	-	exon	16.8161	7.07014	6.29599
chr10	26056038	26056143	CiCo_mm9_circ_000534	105	-	exon	8.95743	7.00531	3.93011
chr10	26057573	26057665	CiCo_mm9_circ_000534	92	-	exon	8.95743	7.00531	3.93011
chr10	26059024	26059109	CiCo_mm9_circ_000534	85	-	exon	8.95743	7.00531	3.93011
chr10	26060713	26060846	CiCo_mm9_circ_000534	133	-	exon	4.7439	13.0594	1.3876
chr10	26062313	26062473	CiCo_mm9_circ_000534	160	-	exon	4.7439	13.0594	1.3876
chr10	26063982	26064057	CiCo_mm9_circ_000534	75	-	exon	4.7439	13.0594	1.3876
chr10	26064417	26064529	CiCo_mm9_circ_000534	112	-	exon	7.17882	9.98102	2.79977
chr10	26072064	26072181	CiCo_mm9_circ_000534	117	-	exon	7.17882	9.98102	2.79977
chr10	26062313	26062473	CiCo_mm9_circ_000535	160	-	exon	7.17882	9.98102	2.79977
chr10	26063982	26064057	CiCo_mm9_circ_000535	75	-	exon	7.63848	6.11718	2.23428
chr10	26064417	26064529	CiCo_mm9_circ_000535	112	-	exon	7.63848	6.11718	2.23428
chr10	26565737	26565934	CiCo_mm9_circ_000536	197	+	exon	4.097	1.8228	0
chr10	26580362	26580538	CiCo_mm9_circ_000536	176	+	exon	6.11079	1.27441	0
chr10	26589726	26589892	CiCo_mm9_circ_000536	166	+	exon	3.77808	2.16116	0.315742
chr10	28074410	28074585	CiCo_mm9_circ_000537	175	+	exon	5.12126	7.68992	3.59516
chr10	28103236	28103530	CiCo_mm9_circ_000537	294	+	exon	2.74985	5.65839	3.57484
chr10	28103236	28103530	CiCo_mm9_circ_000538	294	+	exon	2.74985	5.65839	3.57484
chr10	28271423	28271562	CiCo_mm9_circ_000539	139	+	exon	3.21907	5.47815	2.25981
chr10	28279810	28279971	CiCo_mm9_circ_000539	161	+	exon	2.22553	6.4051	3.25487
chr10	28286300	28286485	CiCo_mm9_circ_000539	185	+	exon	3.87674	8.00413	2.5514
chr10	28288132	28288220	CiCo_mm9_circ_000539	88	+	exon	2.02549	13.1794	3.55476
chr10	28289702	28289779	CiCo_mm9_circ_000539	77	+	exon	2.31113	8.67581	3.38006
chr10	28289979	28289997	CiCo_mm9_circ_000539	18	+	exon	0	0	8.32562
chr10	28293173	28293210	CiCo_mm9_circ_000539	37	+	exon	4.7439	14.2466	4.16281
chr10	28294624	28294722	CiCo_mm9_circ_000539	98	+	exon	2.73134	9.11398	2.13046
chr10	28295395	28295512	CiCo_mm9_circ_000539	117	+	exon	3.05539	7.26415	2.23428
chr10	28300198	28300353	CiCo_mm9_circ_000539	155	+	exon	1.73335	3.75952	2.70405
chr10	28305728	28305878	CiCo_mm9_circ_000539	150	+	exon	1.79074	3.58523	3.84118
chr10	28306713	28306887	CiCo_mm9_circ_000539	174	+	exon	1.54516	3.86693	3.01308
chr10	28309064	28309190	CiCo_mm9_circ_000539	126	+	exon	2.12915	4.61799	3.7367
chr10	28866369	28867559	CiCo_mm9_circ_000540	1190	+	exon	6.43274	22.0457	47.9918
chr10	28867990	28868215	CiCo_mm9_circ_000540	225	+	exon	9.17294	34.5343	48.9959
chr10	28870049	28870208	CiCo_mm9_circ_000540	159	+	exon	8.45007	20.0194	40.8649
chr10	29219737	29219935	CiCo_mm9_circ_000541	198	-	exon	0	0.680114	7.94909
chr10	29224386	29224533	CiCo_mm9_circ_000541	147	-	exon	0	1.52413	8.55064
chr10	29226193	29226385	CiCo_mm9_circ_000541	192	-	exon	0	1.16876	6.28376
chr10	31237189	31237354	CiCo_mm9_circ_000544	165	-	exon	7.60167	6.79431	3.17644
chr10	31254468	31254702	CiCo_mm9_circ_000544	234	-	exon	5.36969	6.14321	2.24379
chr10	31254468	31254702	CiCo_mm9_circ_000545	234	-	exon	5.36969	6.14321	2.24379
chr10	3192055	3192258	CiCo_mm9_circ_000546	203	+	exon	4.41834	1.99033	0.258475
chr10	3193589	3193677	CiCo_mm9_circ_000546	88	+	exon	8.10194	2.53451	1.18492
chr10	36704932	36705045	CiCo_mm9_circ_000549	113	+	exon	21.3475	35.6165	24.0518
chr10	36706112	36706230	CiCo_mm9_circ_000549	118	+	exon	32.5695	40.944	39.4359
chr10	36707885	36707960	CiCo_mm9_circ_000549	75	+	exon	66.4146	71.8266	73.543
chr10	36708955	36709094	CiCo_mm9_circ_000549	139	+	exon	34.1222	41.8918	48.9626
chr10	39552323	39552449	CiCo_mm9_circ_000552	126	+	exon	13.4846	7.81506	10.3797
chr10	39554965	39555158	CiCo_mm9_circ_000552	193	+	exon	13.9383	8.37171	8.15396
chr10	39556431	39556543	CiCo_mm9_circ_000552	112	+	exon	13.56	4.79089	4.19965
chr10	39560690	39560809	CiCo_mm9_circ_000552	119	+	exon	1.50223	4.13547	4.39408
chr10	39563216	39563335	CiCo_mm9_circ_000552	119	+	exon	2.25335	4.51142	6.59112
chr10	39565947	39566089	CiCo_mm9_circ_000552	142	+	exon	4.41216	3.78581	6.63721
chr10	39566474	39566719	CiCo_mm9_circ_000552	245	+	exon	4.39679	2.93426	4.07256
chr10	39800468	39800613	CiCo_mm9_circ_000554	145	-	exon	4.93885	0.309001	0.361157
chr10	39974069	39974114	CiCo_mm9_circ_000555	45	-	exon	23.5132	37.2683	17.1942
chr10	39974206	39974270	CiCo_mm9_circ_000555	64	-	exon	23.5735	21.516	12.1682
chr10	40154109	40154220	CiCo_mm9_circ_000557	111	+	exon	15.2906	15.7094	14.1238
chr10	40155877	40156018	CiCo_mm9_circ_000557	141	+	exon	7.61697	14.6145	16.3385
chr10	41460645	41460719	CiCo_mm9_circ_000558	74	-	exon	7.21073	3.60914	1.40611
chr10	41916271	41917707	CiCo_mm9_circ_000560	1436	-	exon	6.46055	5.52547	6.31133
chr10	42503247	42503347	CiCo_mm9_circ_000561	100	+	exon	16.0635	14.7403	5.74276
chr10	42509105	42509220	CiCo_mm9_circ_000561	115	+	exon	24.8646	17.8901	14.5459
chr10	42510984	42511097	CiCo_mm9_circ_000561	113	+	exon	24.8646	17.8901	14.5459
chr10	42509105	42509220	CiCo_mm9_circ_000563	115	+	exon	22.9288	20.1827	18.5014
chr10	42510984	42511097	CiCo_mm9_circ_000563	113	+	exon	22.9288	20.1827	18.5014
chr10	42514580	42514642	CiCo_mm9_circ_000563	62	+	exon	30.0447	26.4956	22.5981
chr10	42516011	42516070	CiCo_mm9_circ_000563	59	+	exon	25.538	24.8128	16.6975
chr10	42517488	42517539	CiCo_mm9_circ_000563	51	+	exon	29.4669	26.895	20.2804
chr10	42877713	42877899	CiCo_mm9_circ_000564	186	-	exon	2.41	2.41252	18.8922
chr10	42880511	42880650	CiCo_mm9_circ_000564	139	-	exon	5.15052	1.93347	20.7149
chr10	43113676	43113850	CiCo_mm9_circ_000565	174	+	exon	8.75588	5.6715	1.50654
chr10	43115366	43115498	CiCo_mm9_circ_000565	132	+	exon	10.8432	5.76648	3.96458
chr10	43213447	43213495	CiCo_mm9_circ_000566	48	+	exon	7.35789	8.28628	5.38051
chr10	43213951	43214148	CiCo_mm9_circ_000566	197	+	exon	8.64923	7.06334	5.85877
chr10	43655804	43655897	CiCo_mm9_circ_000567	93	+	exon	2.87662	6.71914	2.24379
chr10	44791858	44791933	CiCo_mm9_circ_000568	75	+	exon	9.4878	11.2786	9.01943
chr10	44810798	44810932	CiCo_mm9_circ_000568	134	+	exon	7.34426	8.0203	6.63994
chr10	44812467	44812598	CiCo_mm9_circ_000568	131	+	exon	7.34426	8.0203	6.63994
chr10	44814786	44814996	CiCo_mm9_circ_000568	210	+	exon	5.46267	7.17726	7.58977
chr10	44817198	44817320	CiCo_mm9_circ_000568	122	+	exon	5.46267	7.17726	7.58977
chr10	44810798	44810932	CiCo_mm9_circ_000569	134	+	exon	7.26199	6.20053	7.24711
chr10	44812467	44812598	CiCo_mm9_circ_000569	131	+	exon	7.26199	6.20053	7.24711
chr10	44814786	44814996	CiCo_mm9_circ_000569	210	+	exon	12.4576	9.53634	8.57381
chr10	44817198	44817320	CiCo_mm9_circ_000569	122	+	exon	12.4576	9.53634	8.57381
chr10	45138942	45139014	CiCo_mm9_circ_000571	72	-	exon	3.70414	3.09001	2.88926
chr10	45308185	45308240	CiCo_mm9_circ_000572	55	+	exon	8.04769	2.41683	1.88318
chr10	45309286	45309376	CiCo_mm9_circ_000572	90	+	exon	8.91436	2.4788	1.15888
chr10	45310073	45310178	CiCo_mm9_circ_000572	105	+	exon	9.35354	2.97924	1.98977
chr10	45325314	45325390	CiCo_mm9_circ_000572	76	+	exon	7.02344	5.27309	2.05437
chr10	45338303	45338435	CiCo_mm9_circ_000572	132	+	exon	7.02344	5.27309	2.05437
chr10	45325314	45325390	CiCo_mm9_circ_000573	76	+	exon	3.3885	5.42727	2.77521
chr10	45338303	45338435	CiCo_mm9_circ_000573	132	+	exon	3.3885	5.42727	2.77521
chr10	45368396	45368493	CiCo_mm9_circ_000573	97	+	exon	0.919736	2.30175	3.76635
chr10	45368659	45368761	CiCo_mm9_circ_000573	102	+	exon	0.919736	2.30175	3.76635
chr10	45369686	45369793	CiCo_mm9_circ_000573	107	+	exon	5.25053	1.75201	3.07159
chr10	45372393	45372544	CiCo_mm9_circ_000573	151	+	exon	5.25053	1.75201	3.07159
chr10	45368396	45368493	CiCo_mm9_circ_000574	97	+	exon	5.84202	2.92407	3.90585
chr10	45368659	45368761	CiCo_mm9_circ_000574	102	+	exon	5.84202	2.92407	3.90585
chr10	45369686	45369793	CiCo_mm9_circ_000574	107	+	exon	4.15091	2.37443	3.81591
chr10	45372393	45372544	CiCo_mm9_circ_000574	151	+	exon	4.15091	2.37443	3.81591
chr10	49075714	49075921	CiCo_mm9_circ_000575	207	-	exon	9.96675	9.76028	6.33761
chr10	49124142	49124256	CiCo_mm9_circ_000575	114	-	exon	11.7566	18.438	6.87769
chr10	49139473	49139581	CiCo_mm9_circ_000575	108	-	exon	11.5769	21.5224	4.83752
chr10	49142334	49142478	CiCo_mm9_circ_000575	144	-	exon	11.5769	21.5224	4.83752
chr10	49139473	49139581	CiCo_mm9_circ_000576	108	-	exon	16.162	14.9344	4.36378
chr10	49142334	49142478	CiCo_mm9_circ_000576	144	-	exon	16.162	14.9344	4.36378
chr10	49243487	49243661	CiCo_mm9_circ_000577	174	-	exon	16.9967	12.8898	4.51962
chr10	49247792	49247846	CiCo_mm9_circ_000577	54	-	exon	16.9967	12.8898	4.51962
chr10	49243487	49243661	CiCo_mm9_circ_000578	174	-	exon	22.9432	31.9901	5.75225
chr10	49247792	49247846	CiCo_mm9_circ_000578	54	-	exon	22.9432	31.9901	5.75225
chr10	49255123	49255305	CiCo_mm9_circ_000578	182	-	exon	19.7014	14.545	2.01695
chr10	49293369	49293627	CiCo_mm9_circ_000578	258	-	exon	14.9643	11.1479	3.86815
chr10	49297940	49298108	CiCo_mm9_circ_000578	168	-	exon	11.2001	10.144	4.36808
chr10	50324556	50324688	CiCo_mm9_circ_000579	132	+	exon	4.7439	6.10568	3.17167
chr10	50327725	50327876	CiCo_mm9_circ_000579	151	+	exon	4.7439	3.56165	1.73451
chr10	50337517	50338077	CiCo_mm9_circ_000580	560	+	exon	4.65934	2.73419	2.34978
chr10	50357713	50357834	CiCo_mm9_circ_000581	121	+	exon	2.21641	6.28641	3.45764
chr10	50362328	50362536	CiCo_mm9_circ_000581	208	+	exon	3.88137	6.04401	2.01833
chr10	50364748	50364890	CiCo_mm9_circ_000581	142	+	exon	5.67278	7.25613	1.84367
chr10	50365468	50365594	CiCo_mm9_circ_000581	126	+	exon	4.96802	4.97322	2.90632
chr10	50368914	50369115	CiCo_mm9_circ_000581	201	+	exon	2.23104	4.02008	2.08828
chr10	50369598	50369739	CiCo_mm9_circ_000581	141	+	exon	3.80848	5.401	2.97065
chr10	50370352	50370517	CiCo_mm9_circ_000581	165	+	exon	3.80084	3.80481	1.58822
chr10	50380460	50380532	CiCo_mm9_circ_000581	72	+	exon	4.93885	4.32602	3.61157
chr10	50468611	50468749	CiCo_mm9_circ_000582	138	+	exon	3.24223	2.5965	4.93148
chr10	50468840	50468961	CiCo_mm9_circ_000582	121	+	exon	3.24223	2.5965	4.93148
chr10	50470258	50470391	CiCo_mm9_circ_000582	133	+	exon	3.24223	2.5965	4.93148
chr10	50473802	50473928	CiCo_mm9_circ_000582	126	+	exon	2.21641	4.80725	6.48307
chr10	50468611	50468749	CiCo_mm9_circ_000583	138	+	exon	2.21641	4.80725	6.48307
chr10	50468840	50468961	CiCo_mm9_circ_000583	121	+	exon	2.21641	4.80725	6.48307
chr10	50470258	50470391	CiCo_mm9_circ_000583	133	+	exon	2.69057	5.0501	1.9675
chr10	50473802	50473928	CiCo_mm9_circ_000583	126	+	exon	2.69057	5.0501	1.9675
chr10	50486896	50487008	CiCo_mm9_circ_000583	112	+	exon	2.69057	5.0501	1.9675
chr10	50487178	50487313	CiCo_mm9_circ_000583	135	+	exon	4.96802	3.90753	3.32151
chr10	50468611	50468749	CiCo_mm9_circ_000584	138	+	exon	4.96802	3.90753	3.32151
chr10	50468840	50468961	CiCo_mm9_circ_000584	121	+	exon	4.96802	3.90753	3.32151
chr10	50470258	50470391	CiCo_mm9_circ_000584	133	+	exon	5.58353	4.79089	7.93267
chr10	50473802	50473928	CiCo_mm9_circ_000584	126	+	exon	5.58353	4.79089	7.93267
chr10	50486896	50487008	CiCo_mm9_circ_000584	112	+	exon	4.63925	4.97583	7.75426
chr10	50487178	50487313	CiCo_mm9_circ_000584	135	+	exon	4.63925	4.97583	7.75426
chr10	52003908	52004043	CiCo_mm9_circ_000586	135	+	exon	3.9765	3.31722	3.87713
chr10	52006153	52006205	CiCo_mm9_circ_000586	52	+	exon	8.50322	4.25606	5.96932
chr10	52010656	52010729	CiCo_mm9_circ_000586	73	+	exon	3.65408	3.04826	4.27532
chr10	52031205	52031246	CiCo_mm9_circ_000586	41	+	exon	6.43815	3.22244	3.76635
chr10	52034160	52034210	CiCo_mm9_circ_000586	50	+	exon	5.30201	2.65378	2.0678
chr10	52036837	52036957	CiCo_mm9_circ_000586	120	+	exon	4.46946	2.60991	2.61466
chr10	53283088	53283263	CiCo_mm9_circ_000590	175	-	exon	4.097	1.53798	0
chr10	53331157	53331277	CiCo_mm9_circ_000590	120	-	exon	4.46946	1.86422	0.871553
chr10	53332632	53332758	CiCo_mm9_circ_000590	126	-	exon	4.46946	1.86422	0.871553
chr10	53339939	53340021	CiCo_mm9_circ_000590	82	-	exon	4.96802	1.77615	0.830377
chr10	53331157	53331277	CiCo_mm9_circ_000591	120	-	exon	4.96802	1.77615	0.830377
chr10	53332632	53332758	CiCo_mm9_circ_000591	126	-	exon	2.17191	5.97899	0
chr10	53339939	53340021	CiCo_mm9_circ_000591	82	-	exon	2.17191	5.97899	0
chr10	53394941	53395063	CiCo_mm9_circ_000592	122	-	exon	5.12958	1.46713	1.71476
chr10	57215703	57215812	CiCo_mm9_circ_000595	109	+	exon	13.1104	13.1241	10.0664
chr10	57215960	57216088	CiCo_mm9_circ_000595	128	+	exon	15.3717	15.0381	8.17503
chr10	57217302	57217427	CiCo_mm9_circ_000595	125	+	exon	13.5916	13.2478	9.20664
chr10	57219221	57219297	CiCo_mm9_circ_000595	76	+	exon	24.582	22.2642	15.7502
chr10	57221175	57221237	CiCo_mm9_circ_000595	62	+	exon	25.7526	19.3347	23.4351
chr10	57222428	57222516	CiCo_mm9_circ_000595	88	+	exon	14.1784	18.7553	21.3286
chr10	57924583	57924793	CiCo_mm9_circ_000596	210	+	exon	10.2522	8.76627	6.24751
chr10	57926566	57926748	CiCo_mm9_circ_000596	182	+	exon	9.85072	10.1076	4.89832
chr10	57926830	57927006	CiCo_mm9_circ_000596	176	+	exon	10.6939	9.43065	7.14969
chr10	57927152	57927276	CiCo_mm9_circ_000596	124	+	exon	12.2582	9.74467	10.5458
chr10	57927812	57927974	CiCo_mm9_circ_000596	162	+	exon	9.40049	7.47291	10.3517
chr10	57928191	57928329	CiCo_mm9_circ_000596	138	+	exon	7.78136	7.7895	10.6217
chr10	57928410	57928557	CiCo_mm9_circ_000596	147	+	exon	9.74423	9.75442	7.12553
chr10	57929862	57930042	CiCo_mm9_circ_000596	180	+	exon	11.9515	9.47149	4.95244
chr10	57930137	57930221	CiCo_mm9_circ_000596	84	+	exon	18.0268	9.02284	7.44409
chr10	57933374	57933510	CiCo_mm9_circ_000596	136	+	exon	21.0532	8.56182	5.00348
chr10	57951320	57951422	CiCo_mm9_circ_000598	102	+	exon	11.3761	12.2641	9.21477
chr10	57953357	57953503	CiCo_mm9_circ_000598	146	+	exon	9.81051	8.90008	6.45661
chr10	58511968	58512328	CiCo_mm9_circ_000600	360	+	exon	15.9795	5.62365	6.57286
chr10	58546195	58546366	CiCo_mm9_circ_000601	171	+	exon	15.197	9.18022	10.4232
chr10	58549407	58549664	CiCo_mm9_circ_000601	257	+	exon	12.2275	7.34417	8.58378
chr10	58566919	58567239	CiCo_mm9_circ_000601	320	+	exon	8.70454	6.88659	5.585
chr10	58629251	58629439	CiCo_mm9_circ_000602	188	-	exon	12.3994	8.59318	2.23191
chr10	58633561	58633694	CiCo_mm9_circ_000602	133	-	exon	13.4528	8.08016	1.9675
chr10	58639595	58639764	CiCo_mm9_circ_000602	169	-	exon	13.255	6.10369	2.17119
chr10	58641508	58641605	CiCo_mm9_circ_000602	97	-	exon	13.796	10.588	3.2283
chr10	58654913	58655109	CiCo_mm9_circ_000603	196	-	exon	8.69314	6.64118	1.3383
chr10	58655445	58655563	CiCo_mm9_circ_000603	118	-	exon	6.81686	7.20311	0.886201
chr10	59467542	59467675	CiCo_mm9_circ_000604	133	+	exon	6.05378	7.07014	3.148
chr10	59470474	59470574	CiCo_mm9_circ_000604	100	+	exon	4.46208	7.1468	5.22069
chr10	59475209	59475307	CiCo_mm9_circ_000604	98	+	exon	7.28356	5.92409	2.13046
chr10	60989807	60989957	CiCo_mm9_circ_000606	150	+	exon	4.1784	4.48154	13.6187
chr10	61010795	61010963	CiCo_mm9_circ_000606	168	+	exon	3.20003	3.47032	12.1682
chr10	61209380	61209470	CiCo_mm9_circ_000608	90	-	exon	53.4862	51.5591	78.8037
chr10	61210419	61210519	CiCo_mm9_circ_000608	100	-	exon	48.1905	80.8482	80.3986
chr10	61212023	61212134	CiCo_mm9_circ_000608	111	-	exon	41.848	91.8396	73.9147
chr10	61214424	61214622	CiCo_mm9_circ_000608	198	-	exon	28.9878	62.5705	62.2679
chr10	61900181	61900273	CiCo_mm9_circ_000610	92	-	exon	9.69184	4.36589	3.96885
chr10	61901721	61901799	CiCo_mm9_circ_000610	78	-	exon	12.5503	5.71066	2.66982
chr10	61903882	61903994	CiCo_mm9_circ_000610	112	-	exon	3.98823	6.38785	3.2664
chr10	61926438	61926507	CiCo_mm9_circ_000611	69	-	exon	10.301	12.8898	4.51962
chr10	61927379	61927486	CiCo_mm9_circ_000611	107	-	exon	3.3383	6.26586	3.41762
chr10	61932648	61932805	CiCo_mm9_circ_000611	157	-	exon	6.27516	8.56599	3.33728
chr10	61943305	61943455	CiCo_mm9_circ_000611	150	-	exon	5.96915	6.27416	4.88878
chr10	62052525	62052675	CiCo_mm9_circ_000613	150	-	exon	27.4581	22.7065	12.2219
chr10	62053368	62053514	CiCo_mm9_circ_000613	146	-	exon	18.3947	13.1967	7.89141
chr10	62054564	62054750	CiCo_mm9_circ_000613	186	-	exon	12.532	13.0276	7.04933
chr10	62055757	62055875	CiCo_mm9_circ_000613	118	-	exon	18.9357	17.4391	8.41891
chr10	62056709	62056888	CiCo_mm9_circ_000613	179	-	exon	17.0253	15.2887	9.95991
chr10	62057783	62057859	CiCo_mm9_circ_000613	76	-	exon	26.9232	24.6077	16.435
chr10	62226187	62226271	CiCo_mm9_circ_000614	84	-	exon	25.4496	18.5764	11.7865
chr10	62227071	62227282	CiCo_mm9_circ_000614	211	-	exon	25.4496	18.5764	11.7865
chr10	62228014	62228181	CiCo_mm9_circ_000614	167	-	exon	11.4793	16.8114	6.9642
chr10	62228689	62228803	CiCo_mm9_circ_000614	114	-	exon	11.4793	16.8114	6.9642
chr10	62229304	62229530	CiCo_mm9_circ_000614	226	-	exon	18.7779	16.9178	9.10202
chr10	62226187	62226271	CiCo_mm9_circ_000615	84	-	exon	18.7779	16.9178	9.10202
chr10	62227071	62227282	CiCo_mm9_circ_000615	211	-	exon	20.3781	21.1841	13.2969
chr10	62228014	62228181	CiCo_mm9_circ_000615	167	-	exon	20.3781	21.1841	13.2969
chr10	62228689	62228803	CiCo_mm9_circ_000615	114	-	exon	13.8973	15.1043	9.75602
chr10	62229304	62229530	CiCo_mm9_circ_000615	226	-	exon	13.8973	15.1043	9.75602
chr10	62233602	62233764	CiCo_mm9_circ_000615	162	-	exon	20.4599	21.0348	7.44028
chr10	62233602	62233764	CiCo_mm9_circ_000616	162	-	exon	20.4599	21.0348	7.44028
chr10	62234683	62234813	CiCo_mm9_circ_000616	130	-	exon	22.0175	24.1068	6.44018
chr10	62239315	62239508	CiCo_mm9_circ_000617	193	-	exon	14.8675	15.8132	9.24116
chr10	62239596	62239711	CiCo_mm9_circ_000617	115	-	exon	13.9863	16.7234	11.364
chr10	62477199	62482275	CiCo_mm9_circ_000619	5076	-	exon	6.90608	12.2449	8.8799
chr10	62478549	62478642	CiCo_mm9_circ_000620	93	-	exon	41.2316	76.3102	57.7775
chr10	62478827	62478923	CiCo_mm9_circ_000620	96	-	exon	45.5317	95.3445	80.996
chr10	62479154	62479290	CiCo_mm9_circ_000620	136	-	exon	46.0539	109.986	83.1347
chr10	62479969	62480085	CiCo_mm9_circ_000620	116	-	exon	48.5337	111.822	75.2627
chr10	62480271	62480358	CiCo_mm9_circ_000620	87	-	exon	49.1641	103.045	70.1055
chr10	62480788	62480973	CiCo_mm9_circ_000620	185	-	exon	39.2519	87.8029	56.6978
chr10	62481507	62481646	CiCo_mm9_circ_000620	139	-	exon	46.3547	95.7066	74.5738
chr10	62482140	62482275	CiCo_mm9_circ_000620	135	-	exon	31.1493	68.9982	47.6887
chr10	62751799	62751989	CiCo_mm9_circ_000621	190	+	exon	5.19097	4.724	2.76068
chr10	62761867	62761987	CiCo_mm9_circ_000621	120	+	exon	5.21437	3.3556	5.66509
chr10	62769095	62769194	CiCo_mm9_circ_000622	99	+	exon	6.30939	5.4137	5.80018
chr10	62770489	62770657	CiCo_mm9_circ_000622	168	+	exon	4.80004	4.80506	3.43206
chr10	62771054	62771198	CiCo_mm9_circ_000622	144	+	exon	5.59453	4.04472	4.36378
chr10	66497346	66497460	CiCo_mm9_circ_000624	114	-	exon	14.1079	6.66906	4.12661
chr10	66498632	66498753	CiCo_mm9_circ_000624	121	-	exon	14.1079	6.66906	4.12661
chr10	66502248	66502325	CiCo_mm9_circ_000624	77	-	exon	14.7761	14.4218	9.0763
chr10	66497346	66497460	CiCo_mm9_circ_000625	114	-	exon	14.7761	14.4218	9.0763
chr10	66498632	66498753	CiCo_mm9_circ_000625	121	-	exon	14.7761	14.4218	9.0763
chr10	66502248	66502325	CiCo_mm9_circ_000625	77	-	exon	24.2669	21.4003	14.1963
chr10	66525746	66525819	CiCo_mm9_circ_000625	73	-	exon	24.2669	21.4003	14.1963
chr10	66498632	66498753	CiCo_mm9_circ_000626	121	-	exon	24.2669	21.4003	14.1963
chr10	66502248	66502325	CiCo_mm9_circ_000626	77	-	exon	35.3228	18.8992	12.1134
chr10	66620654	66620819	CiCo_mm9_circ_000627	165	+	exon	11.4025	10.0556	11.7528
chr10	66652483	66652597	CiCo_mm9_circ_000627	114	+	exon	10.9728	8.23825	10.5458
chr10	66708253	66708384	CiCo_mm9_circ_000628	131	+	exon	4.77984	5.81016	5.59246
chr10	66708781	66708904	CiCo_mm9_circ_000628	123	+	exon	2.90755	6.54884	2.97663
chr10	66710758	66710898	CiCo_mm9_circ_000628	140	+	exon	8.31024	5.11934	4.86153
chr10	67480553	67480648	CiCo_mm9_circ_000629	95	+	exon	7.51117	3.75952	0
chr10	67488260	67488367	CiCo_mm9_circ_000629	107	+	exon	6.6766	5.01269	0
chr10	67489265	67489397	CiCo_mm9_circ_000629	132	+	exon	8.1324	5.42727	0
chr10	67705751	67705977	CiCo_mm9_circ_000630	226	-	exon	4.7648	1.39119	0.929145
chr10	69271265	69271593	CiCo_mm9_circ_000631	328	+	exon	0.547928	2.7425	11.3792
chr10	69342640	69342739	CiCo_mm9_circ_000632	99	+	exon	0	12.1808	42.7105
chr10	69345108	69345306	CiCo_mm9_circ_000632	198	+	exon	0	6.34773	25.967
chr10	69443142	69443523	CiCo_mm9_circ_000633	381	+	exon	0	2.0077	12.6991
chr10	69617455	69617584	CiCo_mm9_circ_000635	129	+	exon	14.5601	12.8402	10.1402
chr10	69629749	69629853	CiCo_mm9_circ_000635	104	+	exon	18.0268	16.327	12.0523
chr10	69631839	69632000	CiCo_mm9_circ_000635	161	+	exon	18.0268	16.327	12.0523
chr10	69637758	69637915	CiCo_mm9_circ_000635	157	+	exon	11.684	8.63297	7.8117
chr10	69629749	69629853	CiCo_mm9_circ_000636	104	+	exon	11.684	8.63297	7.8117
chr10	69631839	69632000	CiCo_mm9_circ_000636	161	+	exon	8.55703	10.2792	7.34201
chr10	69637758	69637915	CiCo_mm9_circ_000636	157	+	exon	8.55703	10.2792	7.34201
chr10	70697612	70697762	CiCo_mm9_circ_000637	150	-	exon	11.3414	5.37785	4.19038
chr10	70698290	70698361	CiCo_mm9_circ_000637	71	-	exon	20.0298	6.89245	6.59112
chr10	70699663	70699779	CiCo_mm9_circ_000637	116	-	exon	16.1779	5.39828	4.05607
chr10	70826197	70826283	CiCo_mm9_circ_000638	86	+	exon	8.28819	4.66699	4.24256
chr10	70828756	70828853	CiCo_mm9_circ_000638	97	+	exon	10.1171	4.60349	3.2283
chr10	70835455	70835628	CiCo_mm9_circ_000638	173	+	exon	6.73416	4.14843	2.72736
chr10	7411132	7411612	CiCo_mm9_circ_000640	480	+	exon	7.12078	6.65927	4.49457
chr10	7417299	7417447	CiCo_mm9_circ_000640	148	+	exon	9.0739	9.68896	5.30828
chr10	7421407	7422918	CiCo_mm9_circ_000640	1511	+	exon	6.02086	6.41505	5.30079
chr10	74587768	74587941	CiCo_mm9_circ_000641	173	+	exon	12.9503	16.3345	20.9098
chr10	74593765	74593870	CiCo_mm9_circ_000641	105	+	exon	23.809	21.2803	35.8159
chr10	74594243	74594429	CiCo_mm9_circ_000641	186	+	exon	12.532	13.2689	19.1742
chr10	74720612	74720686	CiCo_mm9_circ_000643	74	+	exon	19.2286	26.467	23.9038
chr10	74721712	74721888	CiCo_mm9_circ_000643	176	+	exon	6.62002	12.4892	9.23501
chr10	74724538	74724702	CiCo_mm9_circ_000643	164	+	exon	10.9253	12.5773	9.90665
chr10	74726023	74726115	CiCo_mm9_circ_000643	92	+	exon	10.9253	12.5773	9.90665
chr10	74724538	74724702	CiCo_mm9_circ_000644	164	+	exon	22.2912	15.0381	12.4735
chr10	74726023	74726115	CiCo_mm9_circ_000644	92	+	exon	22.2912	15.0381	12.4735
chr10	74730243	74730334	CiCo_mm9_circ_000644	91	+	exon	11.7566	14.2208	8.59711
chr10	74736761	74736845	CiCo_mm9_circ_000644	84	+	exon	9.54361	16.4534	11.1661
chr10	74736761	74736845	CiCo_mm9_circ_000645	84	+	exon	9.54361	16.4534	11.1661
chr10	74739515	74739672	CiCo_mm9_circ_000645	157	+	exon	19.9664	15.4188	11.6805
chr10	74742603	74742706	CiCo_mm9_circ_000645	103	+	exon	23.4002	24.7261	12.1682
chr10	75147036	75147150	CiCo_mm9_circ_000646	114	-	exon	16.4593	15.2996	13.7554
chr10	75157459	75157791	CiCo_mm9_circ_000646	332	-	exon	16.4593	15.2996	13.7554
chr10	75162657	75162840	CiCo_mm9_circ_000646	183	-	exon	12.7216	8.80608	11.0842
chr10	75147036	75147150	CiCo_mm9_circ_000647	114	-	exon	12.7216	8.80608	11.0842
chr10	75157459	75157791	CiCo_mm9_circ_000647	332	-	exon	12.7216	8.80608	11.0842
chr10	75162657	75162840	CiCo_mm9_circ_000647	183	-	exon	12.7216	8.80608	11.0842
chr10	75176197	75176376	CiCo_mm9_circ_000647	179	-	exon	18.1248	12.7497	15.7614
chr10	75178343	75178495	CiCo_mm9_circ_000647	152	-	exon	18.1248	12.7497	15.7614
chr10	75180182	75180443	CiCo_mm9_circ_000647	261	-	exon	18.1248	12.7497	15.7614
chr10	75184022	75184284	CiCo_mm9_circ_000647	262	-	exon	16.5246	16.7925	14.0611
chr10	75188003	75188149	CiCo_mm9_circ_000647	146	-	exon	18.8516	13.5637	15.1639
chr10	75188293	75188500	CiCo_mm9_circ_000647	207	-	exon	11.6968	8.09301	10.264
chr10	75189602	75189764	CiCo_mm9_circ_000647	162	-	exon	11.3096	9.43453	11.4279
chr10	75157459	75157791	CiCo_mm9_circ_000648	332	-	exon	14.7158	11.3553	7.53271
chr10	75157459	75157791	CiCo_mm9_circ_000649	332	-	exon	10.4001	7.59133	8.11215
chr10	75162657	75162840	CiCo_mm9_circ_000649	183	-	exon	12.1653	7.47291	12.6161
chr10	75377808	75377938	CiCo_mm9_circ_000653	130	-	exon	43.3469	34.0939	45.0812
chr10	75379517	75379656	CiCo_mm9_circ_000653	139	-	exon	27.684	32.2244	40.6766
chr10	75688032	75688215	CiCo_mm9_circ_000654	183	-	exon	4.40873	7.35558	14.9017
chr10	75688934	75689060	CiCo_mm9_circ_000654	126	-	exon	2.12915	8.17029	13.286
chr10	75945368	75945566	CiCo_mm9_circ_000655	198	+	exon	6.79403	9.29489	6.88921
chr10	75945859	75946128	CiCo_mm9_circ_000655	269	+	exon	7.34426	7.35194	9.76462
chr10	75947398	75947561	CiCo_mm9_circ_000655	163	+	exon	6.59518	7.42734	8.03795
chr10	75951086	75951247	CiCo_mm9_circ_000655	161	+	exon	6.12022	7.79752	7.16072
chr10	75952079	75952321	CiCo_mm9_circ_000655	242	+	exon	5.19291	7.98317	8.89665
chr10	75952612	75952812	CiCo_mm9_circ_000655	200	+	exon	10.3139	13.018	9.70632
chr10	75953472	75953573	CiCo_mm9_circ_000655	101	+	exon	14.1387	9.73052	8.27121
chr10	76260539	76260656	CiCo_mm9_circ_000656	117	-	exon	13.7493	7.64648	2.68113
chr10	76261371	76261404	CiCo_mm9_circ_000656	33	-	exon	13.7493	7.64648	2.68113
chr10	76262273	76262297	CiCo_mm9_circ_000656	24	-	exon	15.906	14.5958	9.30511
chr10	76263504	76263659	CiCo_mm9_circ_000656	155	-	exon	15.906	14.5958	9.30511
chr10	76260539	76260656	CiCo_mm9_circ_000657	117	-	exon	10.8161	14.4365	12.6549
chr10	76261371	76261404	CiCo_mm9_circ_000657	33	-	exon	10.8161	14.4365	12.6549
chr10	76262273	76262297	CiCo_mm9_circ_000657	24	-	exon	5.20004	5.78387	6.42212
chr10	76263504	76263659	CiCo_mm9_circ_000657	155	-	exon	5.20004	5.78387	6.42212
chr10	76288604	76288737	CiCo_mm9_circ_000657	133	-	exon	6.05378	5.72344	5.90249
chr10	7644482	7644670	CiCo_mm9_circ_000658	188	-	exon	11.4456	10.5028	6.69574
chr10	77093470	77093506	CiCo_mm9_circ_000660	36	+	exon	36.5408	52.43	35.6277
chr10	77093593	77093639	CiCo_mm9_circ_000660	46	+	exon	30.6839	60.4722	32.5349
chr10	79322525	79322700	CiCo_mm9_circ_000661	175	+	exon	88.5977	64.339	19.1742
chr10	79463456	79463573	CiCo_mm9_circ_000664	117	+	exon	1.5277	8.79345	12.0651
chr10	79463667	79463835	CiCo_mm9_circ_000664	168	+	exon	2.13335	6.94065	9.67217
chr10	79855839	79856025	CiCo_mm9_circ_000668	186	-	exon	64.5881	78.407	58.9324
chr10	8017853	8018007	CiCo_mm9_circ_000669	154	-	exon	0.58151	3.78377	2.72149
chr10	8027205	8027285	CiCo_mm9_circ_000669	80	-	exon	24.0358	30.0761	32.8091
chr10	8049865	8050021	CiCo_mm9_circ_000669	156	-	exon	20.1616	24.9315	20.1203
chr10	80227346	80227390	CiCo_mm9_circ_000670	44	+	exon	20.1616	24.9315	20.1203
chr10	80228907	80228982	CiCo_mm9_circ_000670	75	+	exon	26.3469	28.4567	18.6579
chr10	80231349	80231413	CiCo_mm9_circ_000670	64	+	exon	26.3469	28.4567	18.6579
chr10	80233882	80234111	CiCo_mm9_circ_000670	229	+	exon	14.4998	16.6726	10.3165
chr10	80228907	80228982	CiCo_mm9_circ_000671	75	+	exon	14.4998	16.6726	10.3165
chr10	80231349	80231413	CiCo_mm9_circ_000671	64	+	exon	31.1026	29.2289	20.7945
chr10	80233882	80234111	CiCo_mm9_circ_000671	229	+	exon	35.446	25.3451	21.921
chr10	80266327	80266468	CiCo_mm9_circ_000672	141	+	exon	0	4.45572	3.25487
chr10	80266545	80266633	CiCo_mm9_circ_000672	88	+	exon	0.574103	5.45968	3.35853
chr10	80571492	80571703	CiCo_mm9_circ_000674	211	+	exon	23.809	34.6869	29.8466
chr10	80577770	80577917	CiCo_mm9_circ_000674	147	+	exon	29.8417	31.0922	31.7086
chr10	80580896	80580974	CiCo_mm9_circ_000674	78	+	exon	38.7919	38.2614	43.3846
chr10	80606706	80607962	CiCo_mm9_circ_000675	1256	+	exon	5.59305	8.75725	6.54393
chr10	80642897	80643156	CiCo_mm9_circ_000676	259	+	exon	221.175	288.557	249.246
chr10	80704739	80704919	CiCo_mm9_circ_000677	180	+	exon	2.48989	4.4865	11.3615
chr10	80705514	80705701	CiCo_mm9_circ_000677	187	+	exon	2.39718	2.15972	5.32899
chr10	80706394	80706540	CiCo_mm9_circ_000677	146	+	exon	1.22631	3.37589	8.60881
chr10	80707405	80707525	CiCo_mm9_circ_000677	120	+	exon	0.74491	4.84698	12.6375
chr10	80708149	80708289	CiCo_mm9_circ_000677	140	+	exon	1.91775	1.59979	10.845
chr10	80708773	80708906	CiCo_mm9_circ_000677	133	+	exon	1.34528	2.35671	14.166
chr10	80709334	80709501	CiCo_mm9_circ_000677	167	+	exon	0.536512	3.75952	10.6713
chr10	80709963	80710138	CiCo_mm9_circ_000677	175	+	exon	0.512126	1.53798	5.99193
chr10	80711134	80711273	CiCo_mm9_circ_000677	139	+	exon	3.21907	2.25571	9.41588
chr10	80711728	80711832	CiCo_mm9_circ_000677	104	+	exon	6.86736	3.43727	8.03489
chr10	80712429	80712541	CiCo_mm9_circ_000677	112	+	exon	1.59529	3.99241	4.66628
chr10	80771692	80771992	CiCo_mm9_circ_000678	300	+	exon	12.5769	19.4845	39.5905
chr10	80824769	80824862	CiCo_mm9_circ_000679	93	+	exon	3.83549	2.87963	10.658
chr10	80824949	80825042	CiCo_mm9_circ_000679	93	+	exon	1.91775	2.87963	8.41419
chr10	80832942	80833126	CiCo_mm9_circ_000681	184	-	exon	15.1036	24.6299	14.2511
chr10	80833209	80833292	CiCo_mm9_circ_000681	83	-	exon	31.1177	26.8537	20.7149
chr10	80833441	80833569	CiCo_mm9_circ_000681	128	-	exon	24.455	29.027	20.0288
chr10	80833699	80833763	CiCo_mm9_circ_000681	64	-	exon	30.5069	45.1142	29.2037
chr10	80833839	80833965	CiCo_mm9_circ_000681	126	-	exon	18.4526	26.6422	15.7772
chr10	80834089	80834199	CiCo_mm9_circ_000681	110	-	exon	23.5485	31.2954	19.0014
chr10	80883011	80883543	CiCo_mm9_circ_000682	532	-	exon	12.3448	10.6649	2.77
chr10	80950424	80950503	CiCo_mm9_circ_000683	79	-	exon	20.2802	15.226	15.1596
chr10	80950591	80950645	CiCo_mm9_circ_000683	54	-	exon	21.3044	17.2254	17.2567
chr10	80950939	80951103	CiCo_mm9_circ_000683	164	-	exon	19.1194	13.1241	13.4219
chr10	82217709	82217840	CiCo_mm9_circ_000684	131	-	exon	11.6082	10.595	13.5817
chr10	82219446	82219540	CiCo_mm9_circ_000684	94	-	exon	18.0268	14.7215	9.43571
chr10	82224577	82224658	CiCo_mm9_circ_000684	81	-	exon	18.6863	11.5536	8.35947
chr10	82969342	82969493	CiCo_mm9_circ_000687	151	-	exon	0.592987	2.67124	4.85661
chr10	82970759	82970887	CiCo_mm9_circ_000687	128	-	exon	0.698714	2.79778	4.90502
chr10	82971357	82971477	CiCo_mm9_circ_000687	120	-	exon	0.74491	3.3556	7.4082
chr10	84321241	84321342	CiCo_mm9_circ_000688	101	+	exon	11.4877	8.40363	0
chr10	84323242	84323301	CiCo_mm9_circ_000688	59	+	exon	15.0223	8.27094	0
chr10	84325987	84326132	CiCo_mm9_circ_000688	145	+	exon	6.17357	5.25302	0
chr10	84331096	84331191	CiCo_mm9_circ_000688	95	+	exon	6.57228	3.75952	0
chr10	84331589	84331707	CiCo_mm9_circ_000688	118	+	exon	3.78715	2.65378	0
chr10	84342914	84343034	CiCo_mm9_circ_000688	120	+	exon	5.95928	4.84698	0
chr10	84343557	84343719	CiCo_mm9_circ_000688	162	+	exon	5.95928	4.84698	0
chr10	84356944	84357107	CiCo_mm9_circ_000688	163	+	exon	2.21188	4.15161	0
chr10	84358701	84358840	CiCo_mm9_circ_000688	139	+	exon	2.21188	4.15161	0
chr10	84342914	84343034	CiCo_mm9_circ_000689	120	+	exon	1.0992	4.1263	0.321518
chr10	84343557	84343719	CiCo_mm9_circ_000689	162	+	exon	1.0992	4.1263	0.321518
chr10	84356944	84357107	CiCo_mm9_circ_000689	163	+	exon	1.93144	3.86693	0.376635
chr10	84358701	84358840	CiCo_mm9_circ_000689	139	+	exon	1.93144	3.86693	0.376635
chr10	84410156	84410765	CiCo_mm9_circ_000690	609	+	exon	3.54626	4.28955	5.53222
chr10	84410156	84410765	CiCo_mm9_circ_000691	609	+	exon	3.54626	4.28955	5.53222
chr10	84420760	84420855	CiCo_mm9_circ_000691	95	+	exon	6.57228	8.45891	4.94334
chr10	84420760	84420855	CiCo_mm9_circ_000692	95	+	exon	6.57228	8.45891	4.94334
chr10	84432607	84432836	CiCo_mm9_circ_000692	229	+	exon	4.70265	6.47291	6.64843
chr10	84433473	84433569	CiCo_mm9_circ_000692	96	+	exon	9.29217	10.6972	11.4155
chr10	84442792	84442937	CiCo_mm9_circ_000692	145	+	exon	5.55621	9.57904	11.557
chr10	87863396	87863482	CiCo_mm9_circ_000694	86	+	exon	7.25217	4.14843	4.84864
chr10	87874660	87874780	CiCo_mm9_circ_000694	120	+	exon	8.19401	3.3556	6.97242
chr10	87875349	87875391	CiCo_mm9_circ_000694	42	+	exon	8.19401	3.3556	6.97242
chr10	87877137	87877343	CiCo_mm9_circ_000694	206	+	exon	12.5769	4.19667	11.0363
chr10	87874660	87874780	CiCo_mm9_circ_000695	120	+	exon	12.5769	4.19667	11.0363
chr10	87875349	87875391	CiCo_mm9_circ_000695	42	+	exon	6.53146	3.26915	2.80202
chr10	87877137	87877343	CiCo_mm9_circ_000695	206	+	exon	6.53146	3.26915	2.80202
chr10	87881869	87881934	CiCo_mm9_circ_000695	65	+	exon	9.55968	8.20258	9.58708
chr10	87882170	87882305	CiCo_mm9_circ_000695	135	+	exon	3.9765	4.64411	5.81569
chr10	88225513	88225680	CiCo_mm9_circ_000696	167	-	exon	6.43815	4.02805	0.941588
chr10	88227418	88227586	CiCo_mm9_circ_000696	168	-	exon	4.2667	2.66948	1.24802
chr10	88228155	88228254	CiCo_mm9_circ_000696	99	-	exon	5.40805	2.70685	1.58187
chr10	88229807	88229964	CiCo_mm9_circ_000696	157	-	exon	7.4161	2.85533	1.33491
chr10	88230197	88230337	CiCo_mm9_circ_000696	140	-	exon	11.5065	3.83951	2.61775
chr10	88231379	88231669	CiCo_mm9_circ_000696	290	-	exon	6.50452	1.86038	0.905996
chr10	88233116	88233199	CiCo_mm9_circ_000696	83	-	exon	6.43815	3.75952	1.88318
chr10	88233429	88233569	CiCo_mm9_circ_000696	140	-	exon	4.47474	2.87963	1.49586
chr10	88234606	88234744	CiCo_mm9_circ_000696	138	-	exon	7.78136	1.94738	1.13803
chr10	88235172	88235313	CiCo_mm9_circ_000696	141	-	exon	6.98222	1.90623	1.11399
chr10	88235596	88235752	CiCo_mm9_circ_000696	156	-	exon	5.16692	2.87352	1.00756
chr10	88237416	88237569	CiCo_mm9_circ_000696	153	-	exon	5.26758	3.80834	1.02719
chr10	88237669	88237720	CiCo_mm9_circ_000696	51	-	exon	5.20004	4.3379	5.07009
chr10	88238908	88238996	CiCo_mm9_circ_000696	88	-	exon	5.06371	3.54831	0.59246
chr10	88240149	88240294	CiCo_mm9_circ_000696	145	-	exon	4.93885	3.70802	1.08347
chr10	88240967	88241191	CiCo_mm9_circ_000696	224	-	exon	5.20775	4.01015	1.40611
chr10	88243692	88243772	CiCo_mm9_circ_000696	80	-	exon	13.3532	5.56966	1.30195
chr10	88245317	88245461	CiCo_mm9_circ_000696	144	-	exon	8.7026	5.60038	0.727296
chr10	88248734	88248943	CiCo_mm9_circ_000696	209	-	exon	4.72131	3.86693	1.50654
chr10	88250199	88250366	CiCo_mm9_circ_000696	167	-	exon	4.82861	2.68537	1.25545
chr10	88253795	88253921	CiCo_mm9_circ_000696	126	-	exon	4.96802	4.26276	0.415189
chr10	88254428	88254514	CiCo_mm9_circ_000696	86	-	exon	5.18012	4.66699	1.21216
chr10	88255343	88255434	CiCo_mm9_circ_000696	91	-	exon	6.85803	6.86521	1.14628
chr10	88271826	88271932	CiCo_mm9_circ_000697	106	-	exon	0.842375	4.63791	0.985588
chr10	88272674	88272830	CiCo_mm9_circ_000697	156	-	exon	6.88923	2.58616	2.01512
chr10	88891774	88891890	CiCo_mm9_circ_000699	116	-	exon	6.93339	7.71183	0
chr10	88893628	88893797	CiCo_mm9_circ_000699	169	-	exon	7.95301	7.43058	0
chr10	88896509	88896557	CiCo_mm9_circ_000699	48	-	exon	11.0368	11.0484	0
chr10	88897034	88897106	CiCo_mm9_circ_000699	72	-	exon	11.1124	8.03404	0
chr10	89187744	89187823	CiCo_mm9_circ_000700	79	-	exon	4.5067	6.2032	5.2729
chr10	89187915	89188014	CiCo_mm9_circ_000700	99	-	exon	3.60536	6.31599	7.38205
chr10	89188346	89188403	CiCo_mm9_circ_000700	57	-	exon	3.10807	8.55614	10.9094
chr10	89188512	89188648	CiCo_mm9_circ_000700	136	-	exon	2.63165	2.96371	4.23371
chr10	89190898	89190967	CiCo_mm9_circ_000700	69	-	exon	3.86289	3.22244	2.25981
chr10	89191644	89191762	CiCo_mm9_circ_000700	118	-	exon	3.86289	3.22244	2.25981
chr10	89190898	89190967	CiCo_mm9_circ_000701	69	-	exon	3.78715	3.03289	2.2155
chr10	89191644	89191762	CiCo_mm9_circ_000701	118	-	exon	3.78715	3.03289	2.2155
chr10	89249849	89250030	CiCo_mm9_circ_000702	181	+	exon	3.4667	3.7182	5.21495
chr10	89252042	89252126	CiCo_mm9_circ_000702	84	+	exon	2.1208	7.96133	10.5458
chr10	89253295	89253478	CiCo_mm9_circ_000702	183	+	exon	4.40873	5.88446	4.29856
chr10	89254107	89254226	CiCo_mm9_circ_000702	119	+	exon	7.51117	6.01523	3.95467
chr10	89257227	89257369	CiCo_mm9_circ_000702	142	+	exon	5.67278	3.47032	2.58114
chr10	89512560	89512857	CiCo_mm9_circ_000703	297	+	exon	0.604927	1.21112	9.73185
chr10	89532212	89532288	CiCo_mm9_circ_000703	76	+	exon	2.34115	1.7577	27.3917
chr10	89533812	89533914	CiCo_mm9_circ_000703	102	+	exon	2.34115	1.7577	27.3917
chr10	89536723	89536837	CiCo_mm9_circ_000703	114	+	exon	2.34115	1.7577	27.3917
chr10	89539720	89539887	CiCo_mm9_circ_000703	167	+	exon	0.875088	1.75201	25.5966
chr10	89532212	89532288	CiCo_mm9_circ_000704	76	+	exon	0.875088	1.75201	25.5966
chr10	89533812	89533914	CiCo_mm9_circ_000704	102	+	exon	0.875088	1.75201	25.5966
chr10	89536723	89536837	CiCo_mm9_circ_000704	114	+	exon	1.56755	2.74608	24.3012
chr10	89539720	89539887	CiCo_mm9_circ_000704	167	+	exon	1.56755	2.74608	24.3012
chr10	89532212	89532288	CiCo_mm9_circ_000705	76	+	exon	1.56755	2.74608	24.3012
chr10	89533812	89533914	CiCo_mm9_circ_000705	102	+	exon	0.536512	1.87976	15.6931
chr10	89536723	89536837	CiCo_mm9_circ_000705	114	+	exon	0.536512	1.87976	15.6931
chr10	89539720	89539887	CiCo_mm9_circ_000705	167	+	exon	0.536512	1.87976	15.6931
chr10	89625905	89626049	CiCo_mm9_circ_000705	144	+	exon	0	0.622265	5.09107
chr10	90384040	90384169	CiCo_mm9_circ_000706	129	+	exon	0.693339	3.12329	5.2729
chr10	90384040	90384169	CiCo_mm9_circ_000707	129	+	exon	0.693339	3.12329	5.2729
chr10	90403308	90403320	CiCo_mm9_circ_000707	12	+	exon	0	0	12.1682
chr10	90404170	90404257	CiCo_mm9_circ_000707	87	+	exon	4.097	1.02532	2.99596
chr10	90411279	90411417	CiCo_mm9_circ_000707	138	+	exon	2.59379	1.94738	5.31083
chr10	90471868	90471994	CiCo_mm9_circ_000708	126	-	exon	5.67774	2.84184	3.32151
chr10	90476804	90476921	CiCo_mm9_circ_000708	117	-	exon	5.34694	3.05859	2.68113
chr10	90481710	90481830	CiCo_mm9_circ_000708	120	-	exon	6.70419	4.10129	3.48621
chr10	90483400	90483526	CiCo_mm9_circ_000708	126	-	exon	7.80689	3.19707	2.90632
chr10	90486464	90486593	CiCo_mm9_circ_000708	129	-	exon	5.54671	1.73516	1.21682
chr10	90494293	90494455	CiCo_mm9_circ_000708	162	-	exon	3.87079	3.59807	2.58792
chr10	90499654	90499780	CiCo_mm9_circ_000708	126	-	exon	4.2583	4.61799	3.7367
chr10	90502529	90502661	CiCo_mm9_circ_000708	132	-	exon	5.4216	6.78409	2.37875
chr10	90510830	90510956	CiCo_mm9_circ_000708	126	-	exon	7.09717	6.39414	2.90632
chr10	90512102	90512229	CiCo_mm9_circ_000708	127	-	exon	4.92921	4.22946	3.29556
chr10	90518659	90518773	CiCo_mm9_circ_000708	114	-	exon	5.48642	4.31527	2.29256
chr10	90614453	90614542	CiCo_mm9_circ_000710	89	-	exon	101.15	80.7043	15.2328
chr10	90615372	90615483	CiCo_mm9_circ_000710	111	-	exon	75.6483	69.6853	16.007
chr10	90615829	90615925	CiCo_mm9_circ_000710	96	-	exon	83.6296	62.3227	14.6771
chr10	90616022	90616142	CiCo_mm9_circ_000710	120	-	exon	70.0215	52.5711	10.0229
chr10	90621492	90621590	CiCo_mm9_circ_000710	98	-	exon	113.806	104.811	20.772
chr10	90626787	90626946	CiCo_mm9_circ_000710	159	-	exon	113.806	104.811	20.772
chr10	90628687	90628814	CiCo_mm9_circ_000710	127	-	exon	83.9374	83.7432	15.1596
chr10	90621492	90621590	CiCo_mm9_circ_000711	98	-	exon	83.9374	83.7432	15.1596
chr10	90626787	90626946	CiCo_mm9_circ_000711	159	-	exon	66.8964	71.1959	14.4181
chr10	90628687	90628814	CiCo_mm9_circ_000711	127	-	exon	66.8964	71.1959	14.4181
chr10	91537914	91538418	CiCo_mm9_circ_000712	504	-	exon	3.39118	12.6856	3.13241
chr10	91546618	91546827	CiCo_mm9_circ_000718	209	-	exon	8.15499	19.3347	4.51962
chr10	91566450	91566657	CiCo_mm9_circ_000718	207	-	exon	2.60002	10.1941	3.29556
chr10	91572383	91572478	CiCo_mm9_circ_000718	95	-	exon	2.60002	10.1941	3.29556
chr10	91595967	91596093	CiCo_mm9_circ_000718	126	-	exon	2.60002	10.1941	3.29556
chr10	91596497	91596596	CiCo_mm9_circ_000718	99	-	exon	16.9001	24.4369	10.9852
chr10	91596986	91597061	CiCo_mm9_circ_000718	75	-	exon	16.9001	24.4369	10.9852
chr10	91597708	91597824	CiCo_mm9_circ_000718	116	-	exon	16.9001	24.4369	10.9852
chr10	91598445	91598554	CiCo_mm9_circ_000718	109	-	exon	16.9001	24.4369	10.9852
chr10	91599301	91599435	CiCo_mm9_circ_000718	134	-	exon	16.3235	40.141	9.13415
chr10	91566450	91566657	CiCo_mm9_circ_000719	207	-	exon	16.3235	40.141	9.13415
chr10	91572383	91572478	CiCo_mm9_circ_000719	95	-	exon	16.3235	40.141	9.13415
chr10	91566450	91566657	CiCo_mm9_circ_000720	207	-	exon	16.3235	40.141	9.13415
chr10	91572383	91572478	CiCo_mm9_circ_000720	95	-	exon	3.60536	16.2411	1.58187
chr10	91595967	91596093	CiCo_mm9_circ_000720	126	-	exon	3.60536	16.2411	1.58187
chr10	91596497	91596596	CiCo_mm9_circ_000720	99	-	exon	3.60536	16.2411	1.58187
chr10	91596986	91597061	CiCo_mm9_circ_000720	75	-	exon	3.60536	16.2411	1.58187
chr10	91597708	91597824	CiCo_mm9_circ_000720	116	-	exon	10.6738	34.4293	13.876
chr10	91598445	91598554	CiCo_mm9_circ_000720	109	-	exon	10.6738	34.4293	13.876
chr10	91599301	91599435	CiCo_mm9_circ_000720	134	-	exon	10.6738	34.4293	13.876
chr10	91572383	91572478	CiCo_mm9_circ_000721	95	-	exon	10.6738	34.4293	13.876
chr10	91595967	91596093	CiCo_mm9_circ_000721	126	-	exon	21.5706	45.4998	12.6189
chr10	91596497	91596596	CiCo_mm9_circ_000721	99	-	exon	21.5706	45.4998	12.6189
chr10	91596986	91597061	CiCo_mm9_circ_000721	75	-	exon	21.5706	45.4998	12.6189
chr10	91597708	91597824	CiCo_mm9_circ_000721	116	-	exon	21.5706	45.4998	12.6189
chr10	91598445	91598554	CiCo_mm9_circ_000721	109	-	exon	21.5706	45.4998	12.6189
chr10	91599301	91599435	CiCo_mm9_circ_000721	134	-	exon	21.5706	45.4998	12.6189
chr10	91595967	91596093	CiCo_mm9_circ_000722	126	-	exon	29.4984	64.3903	17.2567
chr10	91596497	91596596	CiCo_mm9_circ_000722	99	-	exon	29.4984	64.3903	17.2567
chr10	91596986	91597061	CiCo_mm9_circ_000722	75	-	exon	29.4984	64.3903	17.2567
chr10	91597708	91597824	CiCo_mm9_circ_000722	116	-	exon	29.4984	64.3903	17.2567
chr10	91598445	91598554	CiCo_mm9_circ_000722	109	-	exon	29.4984	64.3903	17.2567
chr10	91599301	91599435	CiCo_mm9_circ_000722	134	-	exon	29.4984	64.3903	17.2567
chr10	91597708	91597824	CiCo_mm9_circ_000723	116	-	exon	28.7094	54.8054	14.8422
chr10	91598445	91598554	CiCo_mm9_circ_000723	109	-	exon	28.7094	54.8054	14.8422
chr10	91599301	91599435	CiCo_mm9_circ_000723	134	-	exon	28.7094	54.8054	14.8422
chr10	91597708	91597824	CiCo_mm9_circ_000724	116	-	exon	28.7094	54.8054	14.8422
chr10	91598445	91598554	CiCo_mm9_circ_000724	109	-	exon	28.7094	54.8054	14.8422
chr10	91599301	91599435	CiCo_mm9_circ_000724	134	-	exon	28.7094	54.8054	14.8422
chr10	91624849	91624909	CiCo_mm9_circ_000724	60	-	exon	16.2537	32.5414	5.18645
chr10	92695124	92695245	CiCo_mm9_circ_000725	121	+	exon	25.1193	12.9426	11.6695
chr10	92698182	92698280	CiCo_mm9_circ_000725	98	+	exon	14.5671	12.3039	13.3154
chr10	92698771	92698877	CiCo_mm9_circ_000725	106	+	exon	13.478	5.90279	8.3775
chr10	92699665	92699708	CiCo_mm9_circ_000725	43	+	exon	24.582	8.20258	13.1822
chr10	92700538	92700629	CiCo_mm9_circ_000725	91	+	exon	21.5538	6.86521	8.02397
chr10	92701710	92701788	CiCo_mm9_circ_000725	78	+	exon	27.3825	10.8503	12.6816
chr10	93145162	93145441	CiCo_mm9_circ_000727	279	+	exon	8.04769	4.02805	0.941588
chr10	93170022	93170149	CiCo_mm9_circ_000727	127	+	exon	10.5626	7.40155	0.82389
chr10	93630154	93630302	CiCo_mm9_circ_000728	148	+	exon	1.20985	3.0278	4.60051
chr10	94200517	94200769	CiCo_mm9_circ_000729	252	+	exon	5.70018	3.92297	3.54305
chr10	94202801	94202933	CiCo_mm9_circ_000729	132	+	exon	9.4878	2.37443	0.396458
chr10	94211685	94211800	CiCo_mm9_circ_000729	115	+	exon	11.6553	4.66699	1.36368
chr10	94213003	94213148	CiCo_mm9_circ_000729	145	+	exon	11.6553	4.66699	1.36368
chr10	94213254	94213404	CiCo_mm9_circ_000729	150	+	exon	11.1124	8.03404	4.33389
chr10	94211685	94211800	CiCo_mm9_circ_000730	115	+	exon	11.1124	8.03404	4.33389
chr10	94213003	94213148	CiCo_mm9_circ_000730	145	+	exon	8.3568	8.96309	4.53958
chr10	94213254	94213404	CiCo_mm9_circ_000730	150	+	exon	8.3568	8.96309	4.53958
chr10	94369098	94369199	CiCo_mm9_circ_000731	101	-	exon	8.83668	1.76918	1.55085
chr10	94373169	94373304	CiCo_mm9_circ_000731	135	-	exon	5.96476	0.663444	1.93856
chr10	94385263	94385404	CiCo_mm9_circ_000731	141	-	exon	5.71272	1.90623	1.11399
chr10	98431327	98431758	CiCo_mm9_circ_000732	431	+	exon	3.12966	2.92407	8.05581
chr10	98587464	98587636	CiCo_mm9_circ_000733	172	+	exon	3.64704	3.39008	6.40062
chr10	98592116	98592296	CiCo_mm9_circ_000733	180	+	exon	4.97978	4.4865	3.20452
chr10	98606868	98606976	CiCo_mm9_circ_000734	108	+	exon	2.48075	8.27784	4.35377
chr10	98607112	98607228	CiCo_mm9_circ_000734	116	+	exon	2.48075	8.27784	4.35377
chr10	98615434	98615568	CiCo_mm9_circ_000734	134	+	exon	4.62226	7.32624	5.85877
chr10	98617702	98617771	CiCo_mm9_circ_000734	69	+	exon	4.62226	7.32624	5.85877
chr10	98618835	98618985	CiCo_mm9_circ_000734	150	+	exon	2.67064	6.34941	5.46819
chr10	98606868	98606976	CiCo_mm9_circ_000735	108	+	exon	2.67064	6.34941	5.46819
chr10	98607112	98607228	CiCo_mm9_circ_000735	116	+	exon	6.43815	5.15591	6.02617
chr10	98615434	98615568	CiCo_mm9_circ_000735	134	+	exon	6.43815	5.15591	6.02617
chr10	98617702	98617771	CiCo_mm9_circ_000735	69	+	exon	4.77532	3.58523	3.49198
chr10	98618835	98618985	CiCo_mm9_circ_000735	150	+	exon	4.77532	3.58523	3.49198
chr10	98627502	98627583	CiCo_mm9_circ_000735	81	+	exon	6.59518	5.50173	4.50125
chr11	100353818	100353929	CiCo_mm9_circ_000736	111	-	exon	40.2384	80.5611	52.2582
chr11	100354850	100354932	CiCo_mm9_circ_000736	82	-	exon	38.0084	88.5978	53.3642
chr11	100355197	100355394	CiCo_mm9_circ_000736	197	-	exon	28.2238	79.0638	41.2777
chr11	100357173	100357278	CiCo_mm9_circ_000736	105	-	exon	51.8696	120.446	74.119
chr11	100357173	100357278	CiCo_mm9_circ_000737	105	-	exon	51.8696	120.446	74.119
chr11	100359498	100359667	CiCo_mm9_circ_000737	169	-	exon	37.6442	84.3901	57.3815
chr11	100359934	100360076	CiCo_mm9_circ_000737	142	-	exon	41.6004	84.5497	51.6228
chr11	100365516	100365607	CiCo_mm9_circ_000737	91	-	exon	56.8237	139.266	64.7649
chr11	100366168	100366323	CiCo_mm9_circ_000737	155	-	exon	38.1337	108.158	55.095
chr11	100374189	100374307	CiCo_mm9_circ_000737	118	-	exon	38.1337	108.158	55.095
chr11	100375589	100375651	CiCo_mm9_circ_000737	62	-	exon	45.4458	109.563	68.2375
chr11	100376275	100376412	CiCo_mm9_circ_000737	137	-	exon	45.4458	109.563	68.2375
chr11	100377215	100377334	CiCo_mm9_circ_000737	119	-	exon	64.3815	138.923	90.3925
[truncated: 17,047 more rows]

## Sheet: CiCo
Dori et al., Sequence and Expression Levels of Circular-RNAs in Progenitor Cell Types During Mouse Corticogenesis
circRNAs of the lateral Cortex (CiCo)
chr	start	end	circID	length	strand	geneID	gene_name	gene_strand	n_exon	circBaseID	min_perc_overlap
chr1	10064940	10072427	CiCo_mm9_circ_000001	252	+	ENSMUSG00000056763	Cspp1	+	3	mm9_circ_014962	50
chr1	10072333	10086094	CiCo_mm9_circ_000002	849	+	ENSMUSG00000056763	Cspp1	+	7	mm9_circ_014962	<50
chr1	10188923	10204352	CiCo_mm9_circ_000003	1016	-	ENSMUSG00000067851	Arfgef1	-	6	.	NO
chr1	106875556	106881499	CiCo_mm9_circ_000004	370	+	ENSMUSG00000050840	Cdh20	+	2	.	NO
chr1	107600507	107616193	CiCo_mm9_circ_000005	582	+	ENSMUSG00000026319	2310035C23Rik	+	5	.	NO
chr1	107897507	107919841	CiCo_mm9_circ_000006	592	+	ENSMUSG00000038866	Zcchc2	+	7	.	NO
chr1	108177939	108183693	CiCo_mm9_circ_000007	323	+	ENSMUSG00000044340	Phlpp1	+	2	.	NO
chr1	108235313	108265753	CiCo_mm9_circ_000008	1258	+	ENSMUSG00000044340	Phlpp1	+	8	.	NO
chr1	108239953	108276999	CiCo_mm9_circ_000009	1116	+	ENSMUSG00000044340	Phlpp1	+	8	.	NO
chr1	108260817	108272868	CiCo_mm9_circ_000010	495	+	ENSMUSG00000044340	Phlpp1	+	3	.	NO
chr1	120316016	120316495	CiCo_mm9_circ_000011	479	+	ENSMUSG00000064302	Clasp1	+	1	mm9_circ_001415	100
chr1	120467425	120478040	CiCo_mm9_circ_000013	586	+	ENSMUSG00000064302	Clasp1	+	3	.	NO
chr1	120763148	120764758	CiCo_mm9_circ_000016	389	-	ENSMUSG00000048402	Gli2	-	2	.	NO
chr1	120763148	120786978	CiCo_mm9_circ_000017	495	-	ENSMUSG00000048402	Gli2	-	3	.	NO
chr1	121450782	121475654	CiCo_mm9_circ_000019	622	-	ENSMUSG00000026383	Epb4.1l5	-	6	.	NO
chr1	121464372	121475654	CiCo_mm9_circ_000020	456	-	ENSMUSG00000026383	Epb4.1l5	-	4	.	NO
chr1	121495581	121505863	CiCo_mm9_circ_000022	461	-	ENSMUSG00000026383	Epb4.1l5	-	5	.	NO
chr1	121504563	121505863	CiCo_mm9_circ_000023	277	-	ENSMUSG00000026383	Epb4.1l5	-	2	.	NO
chr1	121564090	121589486	CiCo_mm9_circ_000024	1339	-	ENSMUSG00000026384	Ptpn4	-	11	.	NO
chr1	121602731	121662499	CiCo_mm9_circ_000025	987	-	ENSMUSG00000026384	Ptpn4	-	10	mm9_circ_003388	50
chr1	121618440	121669848	CiCo_mm9_circ_000026	755	-	ENSMUSG00000026384	Ptpn4	-	9	mm9_circ_003388	75
chr1	121637931	121662499	CiCo_mm9_circ_000027	396	-	ENSMUSG00000026384	Ptpn4	-	5	mm9_circ_010323	75
chr1	127299969	127314881	CiCo_mm9_circ_000031	578	-	ENSMUSG00000026341	Actr3	-	5	.	NO
chr1	127302421	127303976	CiCo_mm9_circ_000032	252	-	ENSMUSG00000026341	Actr3	-	2	.	NO
chr1	127873502	127878274	CiCo_mm9_circ_000033	452	-	ENSMUSG00000049690	Nckap5	-	2	.	NO
chr1	127873502	127911226	CiCo_mm9_circ_000034	531	-	ENSMUSG00000049690	Nckap5	-	3	.	NO
chr1	127877959	127878274	CiCo_mm9_circ_000035	315	-	ENSMUSG00000049690	Nckap5	-	1	.	NO
chr1	12929069	12934193	CiCo_mm9_circ_000037	345	-	ENSMUSG00000025938	Slco5a1	-	2	.	NO
chr1	129688181	129696130	CiCo_mm9_circ_000038	463	+	ENSMUSG00000026349	Ccnt2	+	5	mm9_circ_011539	100
chr1	129688181	129698253	CiCo_mm9_circ_000039	534	+	ENSMUSG00000026349	Ccnt2	+	6	mm9_circ_011539	75
chr1	129785732	129787673	CiCo_mm9_circ_000040	212	+	ENSMUSG00000036104	Rab3gap1	+	2	.	NO
chr1	129830993	129835267	CiCo_mm9_circ_000042	351	+	ENSMUSG00000036104	Rab3gap1	+	3	.	NO
chr1	129869523	129873121	CiCo_mm9_circ_000043	604	-	ENSMUSG00000036086	Zranb3	-	2	.	NO
chr1	129884573	129893549	CiCo_mm9_circ_000044	450	-	ENSMUSG00000036086	Zranb3	-	3	.	NO
chr1	129912619	129933206	CiCo_mm9_circ_000045	607	-	ENSMUSG00000036086	Zranb3	-	4	.	NO
chr1	130048320	130049976	CiCo_mm9_circ_000046	420	+	ENSMUSG00000056211	R3hdm1	+	2	.	NO
chr1	130083334	130120218	CiCo_mm9_circ_000047	1259	+	ENSMUSG00000056211	R3hdm1	+	8	mm9_circ_017561	75
chr1	130087214	130093674	CiCo_mm9_circ_000048	523	+	ENSMUSG00000056211	R3hdm1	+	3	mm9_circ_017561	<50
chr1	130090036	130093674	CiCo_mm9_circ_000049	421	+	ENSMUSG00000056211	R3hdm1	+	2	mm9_circ_017561	<50
chr1	130090036	130118280	CiCo_mm9_circ_000050	832	+	ENSMUSG00000056211	R3hdm1	+	5	mm9_circ_017561	75
chr1	130090036	130120218	CiCo_mm9_circ_000051	1005	+	ENSMUSG00000056211	R3hdm1	+	6	mm9_circ_017561	100
chr1	130090036	130132203	CiCo_mm9_circ_000052	1318	+	ENSMUSG00000056211	R3hdm1	+	9	mm9_circ_017561	50
chr1	130107781	130120218	CiCo_mm9_circ_000053	584	+	ENSMUSG00000056211	R3hdm1	+	4	mm9_circ_017561	<50
chr1	130244945	130250147	CiCo_mm9_circ_000055	824	-	ENSMUSG00000026355	Mcm6	-	5	.	NO
chr1	13211387	13214794	CiCo_mm9_circ_000057	278	-	ENSMUSG00000005886	Ncoa2	-	2	mm9_circ_016598	100
chr1	13211387	13276106	CiCo_mm9_circ_000058	335	-	ENSMUSG00000005886	Ncoa2	-	3	mm9_circ_015350	100
chr1	133910959	133916043	CiCo_mm9_circ_000061	1203	+	ENSMUSG00000026436	Elk4	+	3	.	NO
chr1	134421883	134423040	CiCo_mm9_circ_000064	443	-	ENSMUSG00000053024	Cntn2	-	3	.	NO
chr1	134897859	134915461	CiCo_mm9_circ_000066	705	-	ENSMUSG00000054387	Mdm4	-	7	.	NO
chr1	134991274	134996291	CiCo_mm9_circ_000067	574	+	ENSMUSG00000026447	Pik3c2b	+	4	.	NO
chr1	134995207	134996291	CiCo_mm9_circ_000068	437	+	ENSMUSG00000026447	Pik3c2b	+	3	.	NO
chr1	135530338	135544106	CiCo_mm9_circ_000070	1110	-	ENSMUSG00000026464	Zc3h11a	-	9	.	NO
chr1	136512494	136512880	CiCo_mm9_circ_000071	266	+	ENSMUSG00000042207	Kdm5b	+	2	.	NO
chr1	136516136	136521773	CiCo_mm9_circ_000072	964	+	ENSMUSG00000042207	Kdm5b	+	4	.	NO
chr1	136762354	136776322	CiCo_mm9_circ_000073	706	-	ENSMUSG00000073557	Ppp1r12b	-	5	.	NO
chr1	137302397	137304651	CiCo_mm9_circ_000075	519	-	ENSMUSG00000041879	Ipo9	-	5	.	NO
chr1	137428925	137433876	CiCo_mm9_circ_000076	469	-	ENSMUSG00000009418	.v1	-	2	.	NO
chr1	138041175	138041889	CiCo_mm9_circ_000078	406	+	ENSMUSG00000041642	Kif21b	+	2	.	NO
chr1	138045837	138047897	CiCo_mm9_circ_000079	386	+	ENSMUSG00000041642	Kif21b	+	2	.	NO
chr1	138369961	138373015	CiCo_mm9_circ_000080	187	+	ENSMUSG00000041498	Kif14	+	2	.	NO
chr1	138399886	138410399	CiCo_mm9_circ_000081	320	+	ENSMUSG00000041498	Kif14	+	3	.	NO
chr1	139795175	139795362	CiCo_mm9_circ_000082	187	+	.	Intergenic	.	1	.	NO
chr1	140395152	140399242	CiCo_mm9_circ_000084	209	-	ENSMUSG00000026393	Nek7	-	2	.	NO
chr1	140440779	140440920	CiCo_mm9_circ_000085	141	-	ENSMUSG00000026393	Nek7	-	1	.	NO
chr1	140919681	140938620	CiCo_mm9_circ_000086	214	+	ENSMUSG00000056268	Dennd1b	+	3	mm9_circ_016808,mm9_circ_002352	<50
chr1	140936576	140938620	CiCo_mm9_circ_000087	170	+	ENSMUSG00000056268	Dennd1b	+	2	mm9_circ_016808,mm9_circ_002352	<50
chr1	140936576	140959548	CiCo_mm9_circ_000088	486	+	ENSMUSG00000056268	Dennd1b	+	6	mm9_circ_002352	100
chr1	140949922	140959548	CiCo_mm9_circ_000089	316	+	ENSMUSG00000056268	Dennd1b	+	4	mm9_circ_009558	100
chr1	140949922	140987132	CiCo_mm9_circ_000090	565	+	ENSMUSG00000056268	Dennd1b	+	7	mm9_circ_016808	50
chr1	140977749	141007062	CiCo_mm9_circ_000091	477	+	ENSMUSG00000056268	Dennd1b	+	5	mm9_circ_016808	<50
chr1	141386222	141388271	CiCo_mm9_circ_000092	717	+	ENSMUSG00000033952	Aspm	+	4	.	NO
chr1	145514754	145524985	CiCo_mm9_circ_000094	460	-	ENSMUSG00000026361	Cdc73	-	4	.	NO
chr1	152253591	152254707	CiCo_mm9_circ_000095	262	+	ENSMUSG00000006005	Tpr	+	3	mm9_circ_006079	100
chr1	153248209	153269250	CiCo_mm9_circ_000097	746	-	ENSMUSG00000052748	1200016B10Rik	-	7	.	NO
chr1	153323269	153325755	CiCo_mm9_circ_000099	466	-	ENSMUSG00000026484	Rnf2	-	3	mm9_circ_001489	100
chr1	153617961	153631974	CiCo_mm9_circ_000100	649	+	ENSMUSG00000043019	Edem3	+	6	.	NO
chr1	154396196	154399766	CiCo_mm9_circ_000102	320	-	ENSMUSG00000026482	Rgl1	-	2	.	NO
chr1	154693248	154703741	CiCo_mm9_circ_000104	997	-	ENSMUSG00000042772	Smg7	-	7	.	NO
chr1	154702978	154706632	CiCo_mm9_circ_000105	604	-	ENSMUSG00000042772	Smg7	-	4	.	NO
chr1	155316729	155325319	CiCo_mm9_circ_000106	997	-	ENSMUSG00000042699	Dhx9	-	8	.	NO
chr1	155329871	155331002	CiCo_mm9_circ_000107	274	-	ENSMUSG00000042699	Dhx9	-	2	mm9_circ_000727	100
chr1	157021115	157044565	CiCo_mm9_circ_000109	656	+	ENSMUSG00000026470	Stx6	+	6	mm9_circ_013647	100
chr1	157448583	157472088	CiCo_mm9_circ_000110	279	+	ENSMUSG00000033701	Acbd6	+	3	.	NO
chr1	157805690	157809690	CiCo_mm9_circ_000111	358	-	ENSMUSG00000033671	Cep350	-	3	mm9_circ_000111	100
chr1	158799571	158832021	CiCo_mm9_circ_000115	550	-	ENSMUSG00000026594	Ralgps2	-	6	mm9_circ_006421,mm9_circ_004010	75
chr1	158799571	158837909	CiCo_mm9_circ_000116	690	-	ENSMUSG00000026594	Ralgps2	-	7	mm9_circ_006421	100
chr1	159104273	159109383	CiCo_mm9_circ_000118	953	-	ENSMUSG00000070565	Rasal2	-	4	mm9_circ_013084	100
chr1	159216861	159229395	CiCo_mm9_circ_000119	252	-	ENSMUSG00000070565	Rasal2	-	2	mm9_circ_000732	100
chr1	160196592	160225901	CiCo_mm9_circ_000120	745	-	ENSMUSG00000004031	Fam5b	-	3	.	NO
chr1	160402505	160402693	CiCo_mm9_circ_000121	188	+	ENSMUSG00000026587	Astn1	+	1	.	NO
chr1	160503082	160510492	CiCo_mm9_circ_000122	364	+	ENSMUSG00000026587	Astn1	+	3	.	NO
chr1	160509711	160532195	CiCo_mm9_circ_000123	779	+	ENSMUSG00000026587	Astn1	+	5	mm9_circ_010437	<50
chr1	160527287	160542665	CiCo_mm9_circ_000124	784	+	ENSMUSG00000026587	Astn1	+	5	mm9_circ_010437	100
chr1	162156615	162161998	CiCo_mm9_circ_000127	270	-	ENSMUSG00000026721	Rabgap1l	-	2	.	NO
chr1	162630842	162632591	CiCo_mm9_circ_000128	270	-	ENSMUSG00000026721	Rabgap1l	-	2	.	NO
chr1	162665678	162671062	CiCo_mm9_circ_000129	500	-	ENSMUSG00000026721	Rabgap1l	-	4	.	NO
chr1	162872658	162885282	CiCo_mm9_circ_000130	1431	+	ENSMUSG00000040423	Rc3h1	+	7	.	NO
chr1	162965882	162966145	CiCo_mm9_circ_000131	85	+	ENSMUSG00000053332	Gas5	+	2	.	NO
chr1	162966338	162966710	CiCo_mm9_circ_000132	68	+	ENSMUSG00000053332	Gas5	+	2	.	NO
chr1	162992912	162993479	CiCo_mm9_circ_000133	198	-	ENSMUSG00000026709	Dars2	-	2	.	NO
chr1	163783845	163789635	CiCo_mm9_circ_000134	568	-	ENSMUSG00000040297	AI848100	-	4	.	NO
chr1	163786951	163789635	CiCo_mm9_circ_000135	444	-	ENSMUSG00000040297	AI848100	-	3	.	NO
chr1	163787474	163792433	CiCo_mm9_circ_000136	404	-	ENSMUSG00000040297	AI848100	-	3	.	NO
chr1	16379901	16384291	CiCo_mm9_circ_000137	481	-	ENSMUSG00000025920	Stau2	-	3	.	NO
chr1	164283650	164285640	CiCo_mm9_circ_000138	354	-	ENSMUSG00000040265	Dnm3	-	2	mm9_circ_013588	100
chr1	16430403	16453275	CiCo_mm9_circ_000139	296	-	ENSMUSG00000025920	Stau2	-	2	mm9_circ_000040	100
chr1	16430403	16476231	CiCo_mm9_circ_000140	427	-	ENSMUSG00000025920	Stau2	-	3	mm9_circ_006026	50
chr1	16430403	16499489	CiCo_mm9_circ_000141	363	-	ENSMUSG00000025920	Stau2	-	3	mm9_circ_006026	100
chr1	16453115	16476231	CiCo_mm9_circ_000142	291	-	ENSMUSG00000025920	Stau2	-	2	mm9_circ_006026,mm9_circ_000040,mm9_circ_005382	<50
chr1	165184107	165192146	CiCo_mm9_circ_000143	430	-	ENSMUSG00000026586	Prrx1	-	3	.	NO
chr1	16572007	16592434	CiCo_mm9_circ_000144	427	-	ENSMUSG00000025939	Ube2w	-	4	.	NO
chr1	165744499	165759426	CiCo_mm9_circ_000145	666	+	ENSMUSG00000026585	Kifap3	+	5	.	NO
chr1	165795569	165813703	CiCo_mm9_circ_000147	375	+	ENSMUSG00000026585	Kifap3	+	3	mm9_circ_017999,mm9_circ_014597	<50
chr1	165813513	165818436	CiCo_mm9_circ_000148	290	+	ENSMUSG00000026585	Kifap3	+	2	mm9_circ_017999	100
chr1	167157635	167158578	CiCo_mm9_circ_000149	280	-	ENSMUSG00000040843	Tiprl	-	2	.	NO
chr1	167236308	167241124	CiCo_mm9_circ_000150	1140	+	ENSMUSG00000040836	Gpr161	+	2	mm9_circ_015484	<50
chr1	167531880	167538735	CiCo_mm9_circ_000153	620	-	ENSMUSG00000026566	Mpzl1	-	4	mm9_circ_014443	50
chr1	167534740	167538735	CiCo_mm9_circ_000154	514	-	ENSMUSG00000026566	Mpzl1	-	3	mm9_circ_014443	100
chr1	167810260	167822046	CiCo_mm9_circ_000156	452	-	ENSMUSG00000026565	Pou2f1	-	2	.	NO
chr1	167841418	167843480	CiCo_mm9_circ_000157	312	-	ENSMUSG00000026565	Pou2f1	-	2	.	NO
chr1	168312257	168318902	CiCo_mm9_circ_000158	466	+	ENSMUSG00000026563	Tada1	+	4	.	NO
chr1	169160023	169167779	CiCo_mm9_circ_000159	498	-	ENSMUSG00000026558	Uck2	-	4	mm9_circ_006877	<50
chr1	169164822	169167779	CiCo_mm9_circ_000160	400	-	ENSMUSG00000026558	Uck2	-	3	mm9_circ_006877	100
chr1	169762947	169763025	CiCo_mm9_circ_000161	78	+	ENSMUSG00000026686	Lmx1a	+	1	.	NO
chr1	16987544	16987640	CiCo_mm9_circ_000162	96	-	ENSMUSG00000042686	Jph1	-	1	.	NO
chr1	170133477	170139726	CiCo_mm9_circ_000164	436	-	ENSMUSG00000052534	Pbx1	-	2	.	NO
chr1	172717476	172749563	CiCo_mm9_circ_000169	807	-	ENSMUSG00000026663	Atf6	-	7	.	NO
chr1	172779247	172785320	CiCo_mm9_circ_000170	178	-	ENSMUSG00000026663	Atf6	-	2	.	NO
chr1	173066123	173068886	CiCo_mm9_circ_000171	226	-	ENSMUSG00000058076	Sdhc	-	2	.	NO
chr1	173210270	173210653	CiCo_mm9_circ_000172	251	-	ENSMUSG00000062729	Ppox	-	2	.	NO
chr1	174104073	174117591	CiCo_mm9_circ_000174	586	+	ENSMUSG00000026554	Dcaf8	+	6	.	NO
chr1	174129241	174129397	CiCo_mm9_circ_000175	156	-	ENSMUSG00000013698	Pea15a	-	1	.	NO
chr1	174220383	174221527	CiCo_mm9_circ_000176	453	-	ENSMUSG00000007097	Atp1a2	-	3	.	NO
chr1	174414411	174415101	CiCo_mm9_circ_000178	455	+	ENSMUSG00000037995	Igsf9	+	2	.	NO
chr1	176467175	176512194	CiCo_mm9_circ_000179	315	+	ENSMUSG00000028354	Fmn2	+	2	.	NO
chr1	176624317	176625863	CiCo_mm9_circ_000180	369	+	ENSMUSG00000028354	Fmn2	+	3	.	NO
chr1	177826258	177829763	CiCo_mm9_circ_000181	470	+	ENSMUSG00000039748	Exo1	+	2	.	NO
chr1	178756329	178775500	CiCo_mm9_circ_000183	454	+	ENSMUSG00000026504	Sdccag8	+	4	.	NO
chr1	178756329	178804829	CiCo_mm9_circ_000184	728	+	ENSMUSG00000026504	Sdccag8	+	6	.	NO
chr1	178878411	178878520	CiCo_mm9_circ_000185	109	+	ENSMUSG00000026504	Sdccag8	+	1	.	NO
chr1	178961780	178997464	CiCo_mm9_circ_000186	658	-	ENSMUSG00000019699	Akt3	-	5	mm9_circ_009162	50
chr1	178973905	178980383	CiCo_mm9_circ_000187	303	-	ENSMUSG00000019699	Akt3	-	2	mm9_circ_009162	<50
chr1	178973905	178997464	CiCo_mm9_circ_000188	555	-	ENSMUSG00000019699	Akt3	-	4	mm9_circ_009162	100
chr1	178980168	178997464	CiCo_mm9_circ_000189	467	-	ENSMUSG00000019699	Akt3	-	3	mm9_circ_009162	50
chr1	178989464	178997464	CiCo_mm9_circ_000190	252	-	ENSMUSG00000019699	Akt3	-	2	mm9_circ_009162	<50
chr1	178989464	179027229	CiCo_mm9_circ_000191	519	-	ENSMUSG00000019699	Akt3	-	5	mm9_circ_009162	<50
chr1	178989464	179061227	CiCo_mm9_circ_000192	902	-	ENSMUSG00000019699	Akt3	-	8	mm9_circ_009162	<50
chr1	179027097	179039869	CiCo_mm9_circ_000193	389	-	ENSMUSG00000019699	Akt3	-	3	.	NO
chr1	179027097	179061227	CiCo_mm9_circ_000194	515	-	ENSMUSG00000019699	Akt3	-	4	.	NO
chr1	179033092	179061227	CiCo_mm9_circ_000195	383	-	ENSMUSG00000019699	Akt3	-	3	.	NO
chr1	179178806	179179012	CiCo_mm9_circ_000197	206	-	ENSMUSG00000019699	Akt3	-	1	.	NO
chr1	180266012	180266289	CiCo_mm9_circ_000200	186	-	ENSMUSG00000039630	Hnrnpu	-	2	.	NO
chr1	180608956	180609490	CiCo_mm9_circ_000202	534	+	ENSMUSG00000026494	Kif26b	+	1	mm9_circ_001703	100
chr1	180608956	180646100	CiCo_mm9_circ_000203	701	+	ENSMUSG00000026494	Kif26b	+	2	mm9_circ_001703	<50
chr1	180980421	180980509	CiCo_mm9_circ_000204	88	-	ENSMUSG00000055067	Smyd3	-	1	.	NO
chr1	181710986	181716262	CiCo_mm9_circ_000205	618	-	ENSMUSG00000026491	Ahctf1	-	6	.	NO
chr1	181714220	181716262	CiCo_mm9_circ_000206	282	-	ENSMUSG00000026491	Ahctf1	-	3	.	NO
chr1	181722476	181723954	CiCo_mm9_circ_000207	389	-	ENSMUSG00000026491	Ahctf1	-	2	.	NO
chr1	181961635	181970331	CiCo_mm9_circ_000208	329	+	ENSMUSG00000026490	Cdc42bpa	+	3	.	NO
chr1	182039284	182042024	CiCo_mm9_circ_000209	380	+	ENSMUSG00000026490	Cdc42bpa	+	3	.	NO
chr1	182039284	182044245	CiCo_mm9_circ_000210	472	+	ENSMUSG00000026490	Cdc42bpa	+	4	.	NO
chr1	182519528	182519724	CiCo_mm9_circ_000211	196	+	ENSMUSG00000026496	Parp1	+	1	mm9_circ_017126	100
chr1	182663296	182666981	CiCo_mm9_circ_000212	442	+	ENSMUSG00000026499	Acbd3	+	3	.	NO
chr1	182663296	182668768	CiCo_mm9_circ_000213	617	+	ENSMUSG00000026499	Acbd3	+	4	.	NO
chr1	182666822	182668768	CiCo_mm9_circ_000214	334	+	ENSMUSG00000026499	Acbd3	+	2	.	NO
chr1	183111434	183116198	CiCo_mm9_circ_000215	661	-	ENSMUSG00000038733	Wdr26	-	5	.	NO
chr1	183117736	183129075	CiCo_mm9_circ_000216	535	-	ENSMUSG00000038733	Wdr26	-	4	.	NO
chr1	183127705	183133291	CiCo_mm9_circ_000218	392	-	ENSMUSG00000038733	Wdr26	-	3	.	NO
chr1	183748970	183750908	CiCo_mm9_circ_000219	399	-	ENSMUSG00000004880	Lbr	-	3	.	NO
chr1	183853690	183892050	CiCo_mm9_circ_000220	767	-	ENSMUSG00000022995	E.h	-	5	mm9_circ_005856	100
chr1	183886524	183892050	CiCo_mm9_circ_000221	344	-	ENSMUSG00000022995	E.h	-	2	mm9_circ_017328	100
chr1	184414333	184422326	CiCo_mm9_circ_000222	879	-	ENSMUSG00000026509	Capn2	-	7	.	NO
chr1	186735874	186768879	CiCo_mm9_circ_000223	1419	-	ENSMUSG00000026620	Mark1	-	12	.	NO
chr1	186743188	186753249	CiCo_mm9_circ_000224	600	-	ENSMUSG00000026620	Mark1	-	6	.	NO
chr1	186767084	186768879	CiCo_mm9_circ_000225	258	-	ENSMUSG00000026620	Mark1	-	2	.	NO
chr1	187056839	187091158	CiCo_mm9_circ_000226	2693	+	ENSMUSG00000039318	Rab3gap2	+	23	.	NO
chr1	187090779	187091158	CiCo_mm9_circ_000227	281	+	ENSMUSG00000039318	Rab3gap2	+	2	.	NO
chr1	187210124	187221146	CiCo_mm9_circ_000228	601	+	ENSMUSG00000026615	Eprs	+	5	mm9_circ_005659	100
chr1	188559994	188563742	CiCo_mm9_circ_000229	557	-	ENSMUSG00000001305	Rrp15	-	3	.	NO
chr1	190797944	190802531	CiCo_mm9_circ_000231	577	-	ENSMUSG00000026608	Kctd3	-	4	.	NO
chr1	191066765	191082777	CiCo_mm9_circ_000233	488	-	ENSMUSG00000037624	Kcnk2	-	3	.	NO
chr1	191080446	191082777	CiCo_mm9_circ_000234	348	-	ENSMUSG00000037624	Kcnk2	-	2	.	NO
chr1	191492394	191496513	CiCo_mm9_circ_000235	378	-	ENSMUSG00000026605	Cenpf	-	3	.	NO
chr1	191494926	191496513	CiCo_mm9_circ_000236	255	-	ENSMUSG00000026605	Cenpf	-	2	.	NO
chr1	191502817	191506830	CiCo_mm9_circ_000237	703	-	ENSMUSG00000026605	Cenpf	-	4	.	NO
chr1	191707702	191712796	CiCo_mm9_circ_000238	510	-	ENSMUSG00000026603	Smyd2	-	4	.	NO
chr1	191977294	191977402	CiCo_mm9_circ_000239	108	-	ENSMUSG00000010175	Prox1	-	1	.	NO
chr1	192657884	192668481	CiCo_mm9_circ_000240	209	-	ENSMUSG00000089872	Rps6kc1	-	2	mm9_circ_007495	<50
chr1	192668365	192723450	CiCo_mm9_circ_000241	807	-	ENSMUSG00000089872	Rps6kc1	-	5	mm9_circ_007495	100
chr1	192695470	192695830	CiCo_mm9_circ_000242	360	-	ENSMUSG00000089872	Rps6kc1	-	1	mm9_circ_012003,mm9_circ_007495	<50
chr1	192695470	192723450	CiCo_mm9_circ_000243	691	-	ENSMUSG00000089872	Rps6kc1	-	4	mm9_circ_012003	100
chr1	192709212	192723450	CiCo_mm9_circ_000244	331	-	ENSMUSG00000089872	Rps6kc1	-	3	mm9_circ_005949	100
chr1	192790081	192790864	CiCo_mm9_circ_000246	132	-	ENSMUSG00000037568	Vash2	-	2	mm9_circ_000720	100
chr1	193168855	193170783	CiCo_mm9_circ_000247	288	+	ENSMUSG00000026627	Tmem206	+	2	.	NO
chr1	193380319	193385416	CiCo_mm9_circ_000248	396	-	ENSMUSG00000037474	Dtl	-	4	.	NO
chr1	193406277	193407204	CiCo_mm9_circ_000249	277	+	ENSMUSG00000037461	Ints7	+	2	.	NO
chr1	193947419	193949908	CiCo_mm9_circ_000250	366	-	ENSMUSG00000037395	Rcor3	-	3	.	NO
chr1	194812911	194813076	CiCo_mm9_circ_000253	165	-	ENSMUSG00000016200	Syt14	-	1	.	NO
chr1	196469879	196475832	CiCo_mm9_circ_000254	1445	+	ENSMUSG00000026640	Plx.2	+	2	.	NO
chr1	196469879	196538512	CiCo_mm9_circ_000255	1580	+	ENSMUSG00000026640	Plx.2	+	3	.	NO
chr1	22336373	22369621	CiCo_mm9_circ_000257	516	-	ENSMUSG00000041670	Rims1	-	3	mm9_circ_014781	100
chr1	24050952	24093450	CiCo_mm9_circ_000258	1160	-	ENSMUSG00000026153	Fam135a	-	10	.	NO
chr1	24092249	24093450	CiCo_mm9_circ_000259	208	-	ENSMUSG00000026153	Fam135a	-	2	.	NO
chr1	25150609	25151253	CiCo_mm9_circ_000260	644	-	ENSMUSG00000033569	Bai3	-	1	.	NO
chr1	25183485	25188246	CiCo_mm9_circ_000261	288	-	ENSMUSG00000033569	Bai3	-	3	mm9_circ_002776	100
chr1	25278604	25285392	CiCo_mm9_circ_000262	334	-	ENSMUSG00000033569	Bai3	-	3	mm9_circ_008757	100
chr1	25477402	25489421	CiCo_mm9_circ_000263	329	-	ENSMUSG00000033569	Bai3	-	3	mm9_circ_001531	<50
chr1	25544769	25616710	CiCo_mm9_circ_000264	1172	-	ENSMUSG00000033569	Bai3	-	8	.	NO
chr1	25588714	25616710	CiCo_mm9_circ_000265	768	-	ENSMUSG00000033569	Bai3	-	5	.	NO
chr1	25604260	25616710	CiCo_mm9_circ_000266	438	-	ENSMUSG00000033569	Bai3	-	3	.	NO
chr1	33568860	33571062	CiCo_mm9_circ_000269	259	-	ENSMUSG00000026134	Prim2	-	2	.	NO
chr1	33568860	33590208	CiCo_mm9_circ_000270	327	-	ENSMUSG00000026134	Prim2	-	3	.	NO
chr1	33685239	33687278	CiCo_mm9_circ_000271	234	-	ENSMUSG00000026134	Prim2	-	2	.	NO
chr1	33778452	33781864	CiCo_mm9_circ_000272	398	+	ENSMUSG00000004768	Rab23	+	3	.	NO
chr1	33838912	33840809	CiCo_mm9_circ_000273	390	-	ENSMUSG00000042197	Zfp451	-	3	.	NO
chr1	34500407	34500768	CiCo_mm9_circ_000275	288	+	ENSMUSG00000026127	Imp4	+	2	.	NO
chr1	34874841	34876854	CiCo_mm9_circ_000279	451	-	ENSMUSG00000037503	Fam168b	-	3	.	NO
chr1	36222353	36227139	CiCo_mm9_circ_000280	199	-	ENSMUSG00000037470	Uggt1	-	2	.	NO
chr1	36239314	36254480	CiCo_mm9_circ_000281	882	-	ENSMUSG00000037470	Uggt1	-	7	.	NO
chr1	36258549	36259723	CiCo_mm9_circ_000282	161	-	ENSMUSG00000037470	Uggt1	-	2	.	NO
chr1	36264786	36278169	CiCo_mm9_circ_000283	565	-	ENSMUSG00000037470	Uggt1	-	5	.	NO
chr1	36278056	36291787	CiCo_mm9_circ_000284	463	-	ENSMUSG00000037470	Uggt1	-	4	.	NO
chr1	36284328	36291787	CiCo_mm9_circ_000285	350	-	ENSMUSG00000037470	Uggt1	-	3	.	NO
chr1	36400095	36402874	CiCo_mm9_circ_000286	872	-	ENSMUSG00000010453	4632411B12Rik	-	6	.	NO
chr1	38079008	38079159	CiCo_mm9_circ_000288	151	+	ENSMUSG00000026083	Eif5b	+	1	.	NO
chr1	38110460	38142497	CiCo_mm9_circ_000289	2431	-	ENSMUSG00000026082	Rev1	-	16	mm9_circ_016062	100
chr1	38124344	38142497	CiCo_mm9_circ_000290	738	-	ENSMUSG00000026082	Rev1	-	6	mm9_circ_016062	50
chr1	38136134	38140665	CiCo_mm9_circ_000291	226	-	ENSMUSG00000026082	Rev1	-	2	mm9_circ_016062	<50
chr1	38164412	38165312	CiCo_mm9_circ_000292	191	-	ENSMUSG00000026082	Rev1	-	2	mm9_circ_012324	100
chr1	38591750	38593791	CiCo_mm9_circ_000293	820	-	ENSMUSG00000037138	Aff3	-	3	mm9_circ_009331	<50
chr1	38591750	38595846	CiCo_mm9_circ_000294	895	-	ENSMUSG00000037138	Aff3	-	4	mm9_circ_009331	100
chr1	39620892	39622177	CiCo_mm9_circ_000295	320	-	ENSMUSG00000048234	Rnf149	-	2	.	NO
chr1	40030771	40047144	CiCo_mm9_circ_000297	1053	+	ENSMUSG00000026074	Map4k4	+	9	.	NO
chr1	40039983	40047144	CiCo_mm9_circ_000298	725	+	ENSMUSG00000026074	Map4k4	+	6	.	NO
chr1	40067522	40068473	CiCo_mm9_circ_000299	951	+	.	Intergenic	.	1	.	NO
chr1	41894036	41894223	CiCo_mm9_circ_000300	187	+	.	Intergenic	.	1	.	NO
chr1	41894036	41894381	CiCo_mm9_circ_000301	345	+	.	Intergenic	.	1	.	NO
chr1	44016928	44030365	CiCo_mm9_circ_000305	897	+	ENSMUSG00000041763	Tpp2	+	7	.	NO
chr1	44016928	44035680	CiCo_mm9_circ_000306	1377	+	ENSMUSG00000041763	Tpp2	+	11	.	NO
chr1	44218654	44220929	CiCo_mm9_circ_000307	352	+	ENSMUSG00000026048	Ercc5	+	2	.	NO
chr1	5079089	5088214	CiCo_mm9_circ_000309	412	+	ENSMUSG00000033793	Atp6v1h	+	4	.	NO
chr1	5079089	5091204	CiCo_mm9_circ_000310	466	+	ENSMUSG00000033793	Atp6v1h	+	5	.	NO
chr1	51869846	51881045	CiCo_mm9_circ_000312	216	-	ENSMUSG00000018417	Myo1b	-	3	mm9_circ_008958	50
chr1	52245522	52246398	CiCo_mm9_circ_000313	225	-	ENSMUSG00000026103	Gls	-	2	.	NO
chr1	52253008	52269210	CiCo_mm9_circ_000314	433	-	ENSMUSG00000026103	Gls	-	6	.	NO
chr1	53264806	53264929	CiCo_mm9_circ_000317	123	-	ENSMUSG00000026098	Pms1	-	1	.	NO
chr1	53313472	53338936	CiCo_mm9_circ_000318	602	-	ENSMUSG00000026098	Pms1	-	4	mm9_circ_001535	100
chr1	53313472	53338936	CiCo_mm9_circ_000319	602	-	ENSMUSG00000026098	Pms1	-	4	mm9_circ_005547	100
chr1	54820488	54823828	CiCo_mm9_circ_000321	432	-	ENSMUSG00000052331	Ankrd44	-	3	.	NO
chr1	55758773	55758977	CiCo_mm9_circ_000323	204	+	ENSMUSG00000038349	Plcl1	+	1	mm9_circ_003798	100
chr1	56888282	56948109	CiCo_mm9_circ_000325	1143	-	ENSMUSG00000038331	Satb2	-	5	.	NO
chr1	57004922	57026724	CiCo_mm9_circ_000326	405	-	ENSMUSG00000038331	Satb2	-	2	.	NO
chr1	58508932	58514707	CiCo_mm9_circ_000327	350	+	ENSMUSG00000026036	Nif3l1	+	3	.	NO
chr1	58533277	58537193	CiCo_mm9_circ_000328	209	-	ENSMUSG00000026037	Orc2	-	2	.	NO
chr1	59747329	59755303	CiCo_mm9_circ_000329	389	+	ENSMUSG00000026020	Nop58	+	4	.	NO
chr1	59752821	59755303	CiCo_mm9_circ_000330	259	+	ENSMUSG00000026020	Nop58	+	2	.	NO
chr1	59870431	59872255	CiCo_mm9_circ_000332	342	+	ENSMUSG00000067336	Bmpr2	+	2	.	NO
chr1	59870431	59904016	CiCo_mm9_circ_000333	891	+	ENSMUSG00000067336	Bmpr2	+	6	.	NO
chr1	59898274	59899678	CiCo_mm9_circ_000334	203	+	ENSMUSG00000067336	Bmpr2	+	2	.	NO
chr1	60005896	60015279	CiCo_mm9_circ_000337	356	+	ENSMUSG00000041040	Fam117b	+	3	.	NO
chr1	60251347	60252020	CiCo_mm9_circ_000338	254	+	ENSMUSG00000073664	Nbeal1	+	2	.	NO
chr1	60491086	60505046	CiCo_mm9_circ_000339	715	+	ENSMUSG00000026782	Abi2	+	5	.	NO
chr1	60493899	60510606	CiCo_mm9_circ_000340	706	+	ENSMUSG00000026782	Abi2	+	5	.	NO
chr1	60560361	60584333	CiCo_mm9_circ_000342	768	-	ENSMUSG00000026014	Raph1	-	4	.	NO
chr1	62390507	62390714	CiCo_mm9_circ_000343	207	+	ENSMUSG00000052062	Pard3b	+	1	.	NO
chr1	63132241	63132972	CiCo_mm9_circ_000345	731	-	ENSMUSG00000040865	Ino80d	-	1	.	NO
chr1	63139858	63140304	CiCo_mm9_circ_000346	338	-	ENSMUSG00000040865	Ino80d	-	2	.	NO
chr1	63139858	63152333	CiCo_mm9_circ_000347	442	-	ENSMUSG00000040865	Ino80d	-	3	.	NO
chr1	63194969	63195145	CiCo_mm9_circ_000349	176	-	ENSMUSG00000025968	Ndufs1	-	1	mm9_circ_014268	100
chr1	63207453	63212941	CiCo_mm9_circ_000350	611	-	ENSMUSG00000025968	Ndufs1	-	5	.	NO
chr1	64125280	64125908	CiCo_mm9_circ_000352	628	-	ENSMUSG00000025959	Klf7	-	1	.	NO
chr1	64597422	64616850	CiCo_mm9_circ_000353	513	+	ENSMUSG00000025958	Creb1	+	4	mm9_circ_013998	75
chr1	64597422	64622903	CiCo_mm9_circ_000354	664	+	ENSMUSG00000025958	Creb1	+	5	mm9_circ_013998	100
chr1	65236892	65252252	CiCo_mm9_circ_000355	953	+	ENSMUSG00000025949	Pikfyve	+	7	.	NO
chr1	65304482	65305494	CiCo_mm9_circ_000356	199	+	ENSMUSG00000025949	Pikfyve	+	2	.	NO
chr1	66408776	66427347	CiCo_mm9_circ_000357	363	+	ENSMUSG00000015222	Mtap2	+	2	.	NO
chr1	66427062	66427347	CiCo_mm9_circ_000358	285	+	ENSMUSG00000015222	Mtap2	+	1	.	NO
chr1	66458980	66463124	CiCo_mm9_circ_000359	3948	+	ENSMUSG00000015222	Mtap2	+	2	.	NO
chr1	66819479	66824682	CiCo_mm9_circ_000362	264	-	ENSMUSG00000026004	1110028C15Rik	-	2	mm9_circ_016338	50
chr1	66819479	66824682	CiCo_mm9_circ_000363	264	-	ENSMUSG00000026004	1110028C15Rik	-	2	mm9_circ_016338	100
chr1	6823643	6823759	CiCo_mm9_circ_000365	116	+	ENSMUSG00000033740	St18	+	1	.	NO
chr1	68297153	68305887	CiCo_mm9_circ_000366	355	-	ENSMUSG00000062209	Erbb4	-	3	mm9_circ_004519	100
chr1	68297153	68345015	CiCo_mm9_circ_000367	555	-	ENSMUSG00000062209	Erbb4	-	5	mm9_circ_004519	<50
chr1	68786955	68787107	CiCo_mm9_circ_000368	152	-	ENSMUSG00000062209	Erbb4	-	1	.	NO
chr1	71134682	71136101	CiCo_mm9_circ_000371	200	-	ENSMUSG00000026196	Bard1	-	2	.	NO
chr1	72365572	72389716	CiCo_mm9_circ_000373	985	+	ENSMUSG00000026187	Xrcc5	+	8	.	NO
chr1	72493729	72499171	CiCo_mm9_circ_000374	349	-	ENSMUSG00000039372	March4	-	2	.	NO
chr1	73998994	74000524	CiCo_mm9_circ_000375	1530	-	ENSMUSG00000055322	Tns1	-	1	.	NO
chr1	74497068	74500657	CiCo_mm9_circ_000376	484	-	ENSMUSG00000033364	Usp37	-	3	.	NO
chr1	74568891	74573664	CiCo_mm9_circ_000377	319	+	ENSMUSG00000026174	Rqcd1	+	3	.	NO
chr1	74631957	74632271	CiCo_mm9_circ_000379	314	-	ENSMUSG00000026135	Zfp142	-	1	.	NO
chr1	74641782	74642511	CiCo_mm9_circ_000380	303	-	ENSMUSG00000026171	Rnf25	-	3	.	NO
chr1	77395068	77397899	CiCo_mm9_circ_000384	397	-	ENSMUSG00000026235	Epha4	-	3	.	NO
chr1	77396212	77397899	CiCo_mm9_circ_000385	285	-	ENSMUSG00000026235	Epha4	-	2	.	NO
chr1	77465909	77466075	CiCo_mm9_circ_000386	166	-	.	Intergenic	.	1	.	NO
chr1	77503122	77503786	CiCo_mm9_circ_000387	664	-	ENSMUSG00000026235	Epha4	-	1	.	NO
chr1	78467657	78472880	CiCo_mm9_circ_000388	376	-	ENSMUSG00000026245	Farsb	-	3	.	NO
chr1	80300654	80319631	CiCo_mm9_circ_000389	312	-	ENSMUSG00000004364	Cul3	-	2	.	NO
chr1	80319433	80319631	CiCo_mm9_circ_000390	198	-	ENSMUSG00000004364	Cul3	-	1	.	NO
chr1	81188325	81188627	CiCo_mm9_circ_000391	302	+	ENSMUSG00000054976	9430031J16Rik	+	1	.	NO
chr1	82871862	82872899	CiCo_mm9_circ_000393	317	+	ENSMUSG00000026159	Agfg1	+	2	.	NO
chr1	82872745	82879936	CiCo_mm9_circ_000394	665	+	ENSMUSG00000026159	Agfg1	+	4	.	NO
chr1	84759902	84760506	CiCo_mm9_circ_000395	255	-	ENSMUSG00000026219	Trip12	-	2	.	NO
chr1	84765157	84790902	CiCo_mm9_circ_000396	1375	-	ENSMUSG00000026219	Trip12	-	6	.	NO
chr1	84790099	84790902	CiCo_mm9_circ_000398	803	-	ENSMUSG00000026219	Trip12	-	1	.	NO
chr1	84790099	84811544	CiCo_mm9_circ_000399	950	-	ENSMUSG00000026219	Trip12	-	2	.	NO
chr1	87979721	87981845	CiCo_mm9_circ_000402	218	+	ENSMUSG00000026229	Psmd1	+	2	.	NO
chr1	88013149	88015201	CiCo_mm9_circ_000403	232	+	ENSMUSG00000026229	Psmd1	+	2	.	NO
chr1	88013149	88027304	CiCo_mm9_circ_000404	598	+	ENSMUSG00000026229	Psmd1	+	5	.	NO
chr1	88056569	88061426	CiCo_mm9_circ_000405	456	+	ENSMUSG00000062590	Armc9	+	3	.	NO
chr1	88641255	88650855	CiCo_mm9_circ_000407	360	+	ENSMUSG00000053333	Dis3l2	+	3	.	NO
chr1	88856317	88870082	CiCo_mm9_circ_000408	221	+	ENSMUSG00000053333	Dis3l2	+	2	.	NO
chr1	88869974	88886900	CiCo_mm9_circ_000409	342	+	ENSMUSG00000053333	Dis3l2	+	2	.	NO
chr1	88886666	88886900	CiCo_mm9_circ_000410	234	+	ENSMUSG00000053333	Dis3l2	+	1	.	NO
chr1	89116155	89122808	CiCo_mm9_circ_000411	645	+	ENSMUSG00000026254	Eif4e2	+	5	.	NO
chr1	89260678	89261854	CiCo_mm9_circ_000412	226	+	ENSMUSG00000048000	Gigyf2	+	2	mm9_circ_010385	<50
chr1	89260678	89270686	CiCo_mm9_circ_000413	341	+	ENSMUSG00000048000	Gigyf2	+	3	mm9_circ_010385	50
chr1	89260678	89276583	CiCo_mm9_circ_000414	494	+	ENSMUSG00000048000	Gigyf2	+	5	mm9_circ_010385	100
chr1	89260678	89300421	CiCo_mm9_circ_000415	674	+	ENSMUSG00000048000	Gigyf2	+	6	mm9_circ_010385	<50
chr1	89260678	89304030	CiCo_mm9_circ_000416	1055	+	ENSMUSG00000048000	Gigyf2	+	8	mm9_circ_010385	<50
chr1	89275546	89276583	CiCo_mm9_circ_000417	153	+	ENSMUSG00000048000	Gigyf2	+	2	mm9_circ_010385	<50
chr1	89776942	89778514	CiCo_mm9_circ_000418	192	+	ENSMUSG00000070738	Dgkd	+	2	mm9_circ_011975	100
chr1	89811674	89815296	CiCo_mm9_circ_000419	737	+	ENSMUSG00000070738	Dgkd	+	6	.	NO
chr1	89830680	89831076	CiCo_mm9_circ_000420	205	+	ENSMUSG00000070738	Dgkd	+	2	.	NO
chr1	89853785	89859063	CiCo_mm9_circ_000421	264	-	ENSMUSG00000005501	Usp40	-	3	.	NO
chr1	91034133	91042481	CiCo_mm9_circ_000423	2602	+	ENSMUSG00000036206	Sh3bp4	+	2	.	NO
chr1	91501172	91530869	CiCo_mm9_circ_000425	510	+	ENSMUSG00000055013	Agap1	+	5	mm9_circ_012296	100
chr1	91524335	91530869	CiCo_mm9_circ_000426	363	+	ENSMUSG00000055013	Agap1	+	3	mm9_circ_017649	100
chr1	91560235	91567846	CiCo_mm9_circ_000427	377	+	ENSMUSG00000055013	Agap1	+	3	mm9_circ_016400	100
chr1	91560235	91640471	CiCo_mm9_circ_000428	651	+	ENSMUSG00000055013	Agap1	+	5	mm9_circ_016400	<50
chr1	91662880	91685899	CiCo_mm9_circ_000429	321	+	ENSMUSG00000055013	Agap1	+	2	.	NO
chr1	91731008	91739818	CiCo_mm9_circ_000430	469	+	ENSMUSG00000055013	Agap1	+	3	.	NO
chr1	93281141	93281923	CiCo_mm9_circ_000431	201	-	ENSMUSG00000026309	Ilkap	-	2	mm9_circ_010373	100
chr1	93287183	93287774	CiCo_mm9_circ_000432	123	-	ENSMUSG00000026309	Ilkap	-	2	.	NO
chr1	94968935	94969600	CiCo_mm9_circ_000435	665	-	.	Intergenic	.	1	.	NO
chr1	95210857	95211057	CiCo_mm9_circ_000436	200	-	ENSMUSG00000026274	Pask	-	1	.	NO
chr1	95393917	95397136	CiCo_mm9_circ_000437	479	+	ENSMUSG00000026276	Sept2	+	4	.	NO
chr1	95611474	95621893	CiCo_mm9_circ_000439	374	-	ENSMUSG00000026279	Thap4	-	3	.	NO
chr1	95646423	95647562	CiCo_mm9_circ_000440	1139	-	ENSMUSG00000026279	Thap4	-	1	.	NO
chr1	9680161	9683473	CiCo_mm9_circ_000441	271	-	ENSMUSG00000025912	Mybl1	-	3	.	NO
chr1	99819670	99831315	CiCo_mm9_circ_000442	258	-	ENSMUSG00000026335	Pam	-	3	.	NO
chr10	107677160	107680186	CiCo_mm9_circ_000447	447	+	ENSMUSG00000019907	Ppp1r12a	+	4	.	NO
chr10	107705627	107711244	CiCo_mm9_circ_000448	371	+	ENSMUSG00000019907	Ppp1r12a	+	5	.	NO
chr10	108064308	108079454	CiCo_mm9_circ_000450	644	-	ENSMUSG00000035864	Syt1	-	4	.	NO
chr10	10898531	10914167	CiCo_mm9_circ_000451	1403	+	ENSMUSG00000090112	Shprh	+	11	mm9_circ_014114	<50
chr10	109201573	109202062	CiCo_mm9_circ_000452	489	-	ENSMUSG00000020181	.v3	-	1	.	NO
chr10	109253309	109261737	CiCo_mm9_circ_000453	613	-	ENSMUSG00000020181	.v3	-	3	mm9_circ_005597	100
chr10	109253309	109278874	CiCo_mm9_circ_000454	729	-	ENSMUSG00000020181	.v3	-	4	mm9_circ_005597	<50
chr10	109317590	109340919	CiCo_mm9_circ_000455	428	-	ENSMUSG00000020181	.v3	-	4	.	NO
chr10	109653757	109654166	CiCo_mm9_circ_000457	409	-	.	Intergenic	.	1	.	NO
chr10	114843408	114843954	CiCo_mm9_circ_000460	375	+	ENSMUSG00000034163	Zfc3h1	+	2	.	NO
chr10	114860439	114864558	CiCo_mm9_circ_000461	510	+	ENSMUSG00000034163	Zfc3h1	+	4	.	NO
chr10	115954372	115965005	CiCo_mm9_circ_000462	190	-	ENSMUSG00000020166	Cnot2	-	2	mm9_circ_011356	<50
chr10	115954372	115986231	CiCo_mm9_circ_000463	333	-	ENSMUSG00000020166	Cnot2	-	3	mm9_circ_011356	100
chr10	115964882	115986231	CiCo_mm9_circ_000464	266	-	ENSMUSG00000020166	Cnot2	-	2	mm9_circ_011356	50
chr10	116351152	116376537	CiCo_mm9_circ_000465	1064	-	ENSMUSG00000064181	Rab3ip	-	6	.	NO
chr10	116374452	116376537	CiCo_mm9_circ_000466	540	-	ENSMUSG00000064181	Rab3ip	-	2	.	NO
chr10	116513866	116518169	CiCo_mm9_circ_000467	602	-	ENSMUSG00000020170	Frs2	-	4	.	NO
chr10	116536998	116539254	CiCo_mm9_circ_000469	154	-	ENSMUSG00000020170	Frs2	-	3	.	NO
chr10	116792990	116793180	CiCo_mm9_circ_000471	190	-	ENSMUSG00000055531	Cpsf6	-	1	mm9_circ_015241,mm9_circ_008959	<50
chr10	116792990	116797611	CiCo_mm9_circ_000472	460	-	ENSMUSG00000055531	Cpsf6	-	3	mm9_circ_015241	100
chr10	116792990	116800176	CiCo_mm9_circ_000474	1285	-	ENSMUSG00000055531	Cpsf6	-	6	mm9_circ_015241,mm9_circ_008959	50
chr10	116792990	116805044	CiCo_mm9_circ_000475	1599	-	ENSMUSG00000055531	Cpsf6	-	8	mm9_circ_008959	100
chr10	116803136	116805044	CiCo_mm9_circ_000476	314	-	ENSMUSG00000055531	Cpsf6	-	2	mm9_circ_008959	<50
chr10	117129637	117132124	CiCo_mm9_circ_000478	320	-	ENSMUSG00000020184	Mdm2	-	2	.	NO
chr10	117129637	117142285	CiCo_mm9_circ_000479	735	-	ENSMUSG00000020184	Mdm2	-	7	.	NO
chr10	117198300	117214720	CiCo_mm9_circ_000480	1372	-	ENSMUSG00000052798	Nup107	-	15	.	NO
chr10	117202966	117214720	CiCo_mm9_circ_000481	966	-	ENSMUSG00000052798	Nup107	-	11	.	NO
chr10	117214184	117214720	CiCo_mm9_circ_000482	161	-	ENSMUSG00000052798	Nup107	-	2	.	NO
chr10	117222050	117224967	CiCo_mm9_circ_000483	264	-	ENSMUSG00000052798	Nup107	-	2	.	NO
chr10	119334770	119382227	CiCo_mm9_circ_000484	669	+	ENSMUSG00000034813	Grip1	+	6	mm9_circ_004920	<50
chr10	119366956	119382227	CiCo_mm9_circ_000485	588	+	ENSMUSG00000034813	Grip1	+	5	mm9_circ_004920	100
chr10	119472406	119475849	CiCo_mm9_circ_000486	480	+	ENSMUSG00000034813	Grip1	+	3	.	NO
chr10	120998632	121009080	CiCo_mm9_circ_000487	831	-	ENSMUSG00000020115	Tbk1	-	5	.	NO
chr10	121306772	121307566	CiCo_mm9_circ_000488	312	-	ENSMUSG00000020121	Srgap1	-	2	.	NO
chr10	121362871	121368565	CiCo_mm9_circ_000489	359	-	ENSMUSG00000020121	Srgap1	-	2	mm9_circ_014642	100
chr10	122600648	122618856	CiCo_mm9_circ_000491	594	-	ENSMUSG00000020124	Usp15	-	5	mm9_circ_009955	100
chr10	126908823	126913754	CiCo_mm9_circ_000495	412	+	ENSMUSG00000025404	R3hdm2	+	2	.	NO
chr10	127000659	127000849	CiCo_mm9_circ_000497	190	-	ENSMUSG00000040249	Lrp1	-	1	.	NO
chr10	127125288	127130117	CiCo_mm9_circ_000498	503	+	ENSMUSG00000040195	Tmem194	+	4	.	NO
chr10	127455031	127455277	CiCo_mm9_circ_000499	181	+	ENSMUSG00000025395	Prim1	+	2	.	NO
chr10	127455031	127457322	CiCo_mm9_circ_000500	318	+	ENSMUSG00000025395	Prim1	+	3	.	NO
chr10	127522146	127523476	CiCo_mm9_circ_000501	589	+	ENSMUSG00000025393	Atp5b	+	4	.	NO
chr10	127678330	127680427	CiCo_mm9_circ_000504	657	+	ENSMUSG00000039994	Timeless	+	5	.	NO
chr10	127679365	127679774	CiCo_mm9_circ_000505	222	+	ENSMUSG00000039994	Timeless	+	2	.	NO
chr10	127795389	127795589	CiCo_mm9_circ_000506	200	+	ENSMUSG00000005683	Cs	+	1	.	NO
chr10	17809253	17816142	CiCo_mm9_circ_000514	982	+	ENSMUSG00000019854	Reps1	+	7	mm9_circ_017446	100
chr10	17812650	17814714	CiCo_mm9_circ_000515	703	+	ENSMUSG00000019854	Reps1	+	5	mm9_circ_017338	100
chr10	17812650	17816142	CiCo_mm9_circ_000516	858	+	ENSMUSG00000019854	Reps1	+	6	mm9_circ_017338,mm9_circ_017446	50
chr10	20706775	20708490	CiCo_mm9_circ_000523	272	+	ENSMUSG00000019986	Ahi1	+	2	.	NO
chr10	21056772	21072416	CiCo_mm9_circ_000524	1068	+	ENSMUSG00000019977	Hbs1l	+	8	.	NO
chr10	23525698	23525846	CiCo_mm9_circ_000526	148	+	ENSMUSG00000037455	1110021L09Rik	+	1	mm9_circ_011389	100
chr10	24959431	24959544	CiCo_mm9_circ_000527	113	-	ENSMUSG00000039166	Akap7	-	1	mm9_circ_000741	<50
chr10	24959431	25003847	CiCo_mm9_circ_000528	560	-	ENSMUSG00000039166	Akap7	-	4	mm9_circ_000741	100
chr10	24987113	24991447	CiCo_mm9_circ_000529	298	-	ENSMUSG00000039166	Akap7	-	2	mm9_circ_000741,mm9_circ_010383	<50
chr10	24987113	25003847	CiCo_mm9_circ_000530	447	-	ENSMUSG00000039166	Akap7	-	3	mm9_circ_010383	50
chr10	24987113	25003847	CiCo_mm9_circ_000531	447	-	ENSMUSG00000039166	Akap7	-	3	mm9_circ_010383	100
chr10	26022458	26023543	CiCo_mm9_circ_000532	218	-	ENSMUSG00000039089	L3mbtl3	-	2	mm9_circ_011517	<50
chr10	26047492	26072181	CiCo_mm9_circ_000533	1259	-	ENSMUSG00000039089	L3mbtl3	-	11	mm9_circ_011517	<50
chr10	26049980	26072181	CiCo_mm9_circ_000534	1107	-	ENSMUSG00000039089	L3mbtl3	-	10	mm9_circ_011517	<50
chr10	26062313	26064529	CiCo_mm9_circ_000535	347	-	ENSMUSG00000039089	L3mbtl3	-	3	mm9_circ_011517	<50
chr10	26565737	26589892	CiCo_mm9_circ_000536	539	+	ENSMUSG00000039031	Arhgap18	+	3	.	NO
chr10	28074410	28103530	CiCo_mm9_circ_000537	469	+	ENSMUSG00000019889	Ptprk	+	2	.	NO
chr10	28103236	28103530	CiCo_mm9_circ_000538	294	+	ENSMUSG00000019889	Ptprk	+	1	.	NO
chr10	28271423	28309190	CiCo_mm9_circ_000539	1525	+	ENSMUSG00000019889	Ptprk	+	13	.	NO
chr10	28866369	28870208	CiCo_mm9_circ_000540	1574	+	ENSMUSG00000038916	6330407J23Rik	+	3	.	NO
chr10	29219737	29226385	CiCo_mm9_circ_000541	537	-	ENSMUSG00000019880	Rspo3	-	3	.	NO
chr10	31237189	31254702	CiCo_mm9_circ_000544	399	-	ENSMUSG00000063760	Rnf217	-	2	mm9_circ_015992	100
chr10	31254468	31254702	CiCo_mm9_circ_000545	234	-	ENSMUSG00000063760	Rnf217	-	1	mm9_circ_015992	<50
chr10	3192055	3193677	CiCo_mm9_circ_000546	291	+	ENSMUSG00000015202	Cnksr3	+	2	.	NO
chr10	36704932	36709094	CiCo_mm9_circ_000549	445	+	ENSMUSG00000019777	Hdac2	+	4	.	NO
chr10	39552323	39566719	CiCo_mm9_circ_000552	1056	+	ENSMUSG00000019841	Rev3l	+	7	.	NO
chr10	39800468	39800613	CiCo_mm9_circ_000554	145	-	ENSMUSG00000019838	Slc16a10	-	1	.	NO
chr10	39974069	39974270	CiCo_mm9_circ_000555	109	-	ENSMUSG00000019837	Gtf3c6	-	2	mm9_circ_018856	100
chr10	40154109	40156018	CiCo_mm9_circ_000557	252	+	ENSMUSG00000038481	Cdk19	+	2	.	NO
chr10	41460645	41460719	CiCo_mm9_circ_000558	74	-	ENSMUSG00000019813	Cep57l1	-	1	.	NO
chr10	41916271	41917707	CiCo_mm9_circ_000560	1436	-	ENSMUSG00000048756	Foxo3	-	1	.	NO
chr10	42503247	42511097	CiCo_mm9_circ_000561	328	+	ENSMUSG00000019802	Sec63	+	3	.	NO
chr10	42509105	42517539	CiCo_mm9_circ_000563	400	+	ENSMUSG00000019802	Sec63	+	5	.	NO
chr10	42877713	42880650	CiCo_mm9_circ_000564	325	-	ENSMUSG00000038248	Sobp	-	2	.	NO
chr10	43113676	43115498	CiCo_mm9_circ_000565	306	+	ENSMUSG00000038240	Pdss2	+	2	mm9_circ_010770	100
chr10	43213447	43214148	CiCo_mm9_circ_000566	245	+	ENSMUSG00000038214	Bend3	+	2	.	NO
chr10	43655804	43655897	CiCo_mm9_circ_000567	93	+	ENSMUSG00000019864	Rtn4ip1	+	1	.	NO
chr10	44791858	44817320	CiCo_mm9_circ_000568	672	+	ENSMUSG00000019849	Prep	+	5	.	NO
chr10	44810798	44817320	CiCo_mm9_circ_000569	597	+	ENSMUSG00000019849	Prep	+	4	.	NO
chr10	45138942	45139014	CiCo_mm9_circ_000571	72	-	ENSMUSG00000063804	Lin28b	-	1	mm9_circ_009965	100
chr10	45308185	45338435	CiCo_mm9_circ_000572	458	+	ENSMUSG00000038822	Hace1	+	5	.	NO
chr10	45325314	45372544	CiCo_mm9_circ_000573	665	+	ENSMUSG00000038822	Hace1	+	6	.	NO
chr10	45368396	45372544	CiCo_mm9_circ_000574	457	+	ENSMUSG00000038822	Hace1	+	4	.	NO
chr10	49075714	49142478	CiCo_mm9_circ_000575	573	-	ENSMUSG00000056073	Grik2	-	4	.	NO
chr10	49139473	49142478	CiCo_mm9_circ_000576	252	-	ENSMUSG00000056073	Grik2	-	2	.	NO
chr10	49243487	49247846	CiCo_mm9_circ_000577	228	-	ENSMUSG00000056073	Grik2	-	2	.	NO
chr10	49243487	49298108	CiCo_mm9_circ_000578	836	-	ENSMUSG00000056073	Grik2	-	5	.	NO
chr10	50324556	50327876	CiCo_mm9_circ_000579	283	+	ENSMUSG00000038774	Ascc3	+	2	.	NO
chr10	50337517	50338077	CiCo_mm9_circ_000580	560	+	ENSMUSG00000038774	Ascc3	+	1	.	NO
chr10	50357713	50380532	CiCo_mm9_circ_000581	1176	+	ENSMUSG00000038774	Ascc3	+	8	.	NO
chr10	50468611	50473928	CiCo_mm9_circ_000582	518	+	ENSMUSG00000038774	Ascc3	+	4	.	NO
chr10	50468611	50487313	CiCo_mm9_circ_000583	765	+	ENSMUSG00000038774	Ascc3	+	6	.	NO
chr10	50468611	50487313	CiCo_mm9_circ_000584	765	+	ENSMUSG00000038774	Ascc3	+	6	.	NO
chr10	52003908	52036957	CiCo_mm9_circ_000586	471	+	ENSMUSG00000019891	Dcbld1	+	6	.	NO
chr10	53283088	53340021	CiCo_mm9_circ_000590	503	-	ENSMUSG00000058298	Mcm9	-	4	.	NO
chr10	53331157	53340021	CiCo_mm9_circ_000591	328	-	ENSMUSG00000058298	Mcm9	-	3	.	NO
chr10	53394941	53395063	CiCo_mm9_circ_000592	122	-	ENSMUSG00000019856	Fam184a	-	1	.	NO
chr10	57215703	57222516	CiCo_mm9_circ_000595	588	+	ENSMUSG00000019878	Hsf2	+	6	.	NO
chr10	57924583	57933510	CiCo_mm9_circ_000596	1539	+	ENSMUSG00000003226	Ranbp2	+	10	.	NO
chr10	57951320	57953503	CiCo_mm9_circ_000598	248	+	ENSMUSG00000003226	Ranbp2	+	2	.	NO
chr10	58511968	58512328	CiCo_mm9_circ_000600	360	+	ENSMUSG00000037990	Sh3rf3	+	1	.	NO
chr10	58546195	58567239	CiCo_mm9_circ_000601	748	+	ENSMUSG00000037990	Sh3rf3	+	3	.	NO
chr10	58629251	58641605	CiCo_mm9_circ_000602	587	-	ENSMUSG00000019917	Sept10	-	4	.	NO
chr10	58654913	58655563	CiCo_mm9_circ_000603	314	-	ENSMUSG00000019917	Sept10	-	2	.	NO
chr10	59467542	59475307	CiCo_mm9_circ_000604	331	+	ENSMUSG00000044475	Ascc1	+	3	.	NO
chr10	60989807	61010963	CiCo_mm9_circ_000606	318	+	ENSMUSG00000037151	Lrrc20	+	2	.	NO
chr10	61209380	61214622	CiCo_mm9_circ_000608	499	-	ENSMUSG00000020086	H2afy2	-	4	.	NO
chr10	61900181	61903994	CiCo_mm9_circ_000610	282	-	ENSMUSG00000020079	Supv3l1	-	3	.	NO
chr10	61926438	61943455	CiCo_mm9_circ_000611	483	-	ENSMUSG00000020078	Vps26a	-	4	.	NO
chr10	62052525	62057859	CiCo_mm9_circ_000613	855	-	ENSMUSG00000020075	Ddx21	-	6	.	NO
chr10	62226187	62229530	CiCo_mm9_circ_000614	802	-	ENSMUSG00000020074	Ccar1	-	5	.	NO
chr10	62226187	62233764	CiCo_mm9_circ_000615	964	-	ENSMUSG00000020074	Ccar1	-	6	mm9_circ_006029	<50
chr10	62233602	62234813	CiCo_mm9_circ_000616	292	-	ENSMUSG00000020074	Ccar1	-	2	mm9_circ_006029	<50
chr10	62239315	62239711	CiCo_mm9_circ_000617	308	-	ENSMUSG00000020074	Ccar1	-	2	mm9_circ_006029	<50
chr10	62477199	62482275	CiCo_mm9_circ_000619	5076	-	ENSMUSG00000020069	Hnrnph3	-	1	.	NO
chr10	62478549	62482275	CiCo_mm9_circ_000620	987	-	ENSMUSG00000020069	Hnrnph3	-	8	.	NO
chr10	62751799	62761987	CiCo_mm9_circ_000621	310	+	ENSMUSG00000020064	Herc4	+	2	.	NO
chr10	62769095	62771198	CiCo_mm9_circ_000622	411	+	ENSMUSG00000020064	Herc4	+	3	.	NO
chr10	66497346	66502325	CiCo_mm9_circ_000624	312	-	ENSMUSG00000019873	Reep3	-	3	.	NO
chr10	66497346	66525819	CiCo_mm9_circ_000625	385	-	ENSMUSG00000019873	Reep3	-	4	.	NO
chr10	66498632	66502325	CiCo_mm9_circ_000626	198	-	ENSMUSG00000019873	Reep3	-	2	.	NO
chr10	66620654	66652597	CiCo_mm9_circ_000627	279	+	ENSMUSG00000037876	Jmjd1c	+	2	mm9_circ_018701	100
chr10	66708253	66710898	CiCo_mm9_circ_000628	394	+	ENSMUSG00000037876	Jmjd1c	+	3	.	NO
chr10	67480553	67489397	CiCo_mm9_circ_000629	334	+	ENSMUSG00000037846	Rtkn2	+	3	.	NO
chr10	67705751	67705977	CiCo_mm9_circ_000630	226	-	ENSMUSG00000019947	Arid5b	-	1	.	NO
chr10	69271265	69271593	CiCo_mm9_circ_000631	328	+	.	Intergenic	.	1	.	NO
chr10	69342640	69345306	CiCo_mm9_circ_000632	297	+	ENSMUSG00000069601	Ank3	+	2	.	NO
chr10	69443142	69443523	CiCo_mm9_circ_000633	381	+	.	Intergenic	.	1	.	NO
chr10	69617455	69637915	CiCo_mm9_circ_000635	551	+	ENSMUSG00000048701	Ccdc6	+	4	.	NO
chr10	69629749	69637915	CiCo_mm9_circ_000636	422	+	ENSMUSG00000048701	Ccdc6	+	3	.	NO
chr10	70697612	70699779	CiCo_mm9_circ_000637	337	-	ENSMUSG00000003923	Tfam	-	3	.	NO
chr10	70826197	70835628	CiCo_mm9_circ_000638	356	+	ENSMUSG00000060733	Ipmk	+	3	.	NO
chr10	7411132	7422918	CiCo_mm9_circ_000640	2139	+	ENSMUSG00000040021	Lats1	+	3	.	NO
chr10	74587768	74594429	CiCo_mm9_circ_000641	464	+	ENSMUSG00000009681	Bcr	+	3	.	NO
chr10	74720612	74726115	CiCo_mm9_circ_000643	506	+	ENSMUSG00000033444	Specc1l	+	4	.	NO
chr10	74724538	74736845	CiCo_mm9_circ_000644	431	+	ENSMUSG00000033444	Specc1l	+	4	mm9_circ_003232	<50
chr10	74736761	74742706	CiCo_mm9_circ_000645	344	+	ENSMUSG00000033444	Specc1l	+	3	mm9_circ_003232	100
chr10	75147036	75162840	CiCo_mm9_circ_000646	629	-	ENSMUSG00000020196	Cabin1	-	3	mm9_circ_010009	100
chr10	75147036	75189764	CiCo_mm9_circ_000647	1998	-	ENSMUSG00000020196	Cabin1	-	10	mm9_circ_010009	<50
chr10	75157459	75157791	CiCo_mm9_circ_000648	332	-	ENSMUSG00000020196	Cabin1	-	1	mm9_circ_010009	<50
chr10	75157459	75162840	CiCo_mm9_circ_000649	515	-	ENSMUSG00000020196	Cabin1	-	2	mm9_circ_010009	<50
chr10	75377808	75379656	CiCo_mm9_circ_000653	269	-	ENSMUSG00000000902	Smarcb1	-	2	.	NO
chr10	75688032	75689060	CiCo_mm9_circ_000654	309	-	ENSMUSG00000020230	Prmt2	-	2	.	NO
chr10	75945368	75953573	CiCo_mm9_circ_000655	1334	+	ENSMUSG00000001150	Mcm3ap	+	7	.	NO
chr10	76260539	76263659	CiCo_mm9_circ_000656	329	-	ENSMUSG00000001120	Pcbp3	-	4	.	NO
chr10	76260539	76288737	CiCo_mm9_circ_000657	462	-	ENSMUSG00000001120	Pcbp3	-	5	.	NO
chr10	7644482	7644670	CiCo_mm9_circ_000658	188	-	ENSMUSG00000015755	Tab2	-	1	.	NO
chr10	77093470	77093639	CiCo_mm9_circ_000660	82	+	ENSMUSG00000020265	Sumo3	+	2	.	NO
chr10	79322525	79322700	CiCo_mm9_circ_000661	175	+	ENSMUSG00000006498	Ptbp1	+	1	.	NO
chr10	79463456	79463835	CiCo_mm9_circ_000664	285	+	ENSMUSG00000035722	Abca7	+	2	.	NO
chr10	79855839	79856025	CiCo_mm9_circ_000668	186	-	ENSMUSG00000035478	Mbd3	-	1	.	NO
chr10	8017853	8050021	CiCo_mm9_circ_000669	390	-	ENSMUSG00000047712	Ust	-	3	.	NO
chr10	80227346	80234111	CiCo_mm9_circ_000670	412	+	ENSMUSG00000061589	Dot1l	+	4	.	NO
chr10	80228907	80234111	CiCo_mm9_circ_000671	368	+	ENSMUSG00000061589	Dot1l	+	3	.	NO
chr10	80266327	80266633	CiCo_mm9_circ_000672	229	+	ENSMUSG00000020211	Sf3a2	+	2	mm9_circ_013932	100
chr10	80571492	80580974	CiCo_mm9_circ_000674	436	+	ENSMUSG00000035027	Map2k2	+	3	mm9_circ_000870	100
chr10	80606706	80607962	CiCo_mm9_circ_000675	1256	+	ENSMUSG00000035011	Zbtb7a	+	1	.	NO
chr10	80642897	80643156	CiCo_mm9_circ_000676	259	+	ENSMUSG00000034994	Eef2	+	1	.	NO
chr10	80704739	80712541	CiCo_mm9_circ_000677	1603	+	ENSMUSG00000034949	Zfr2	+	11	mm9_circ_000424	100
chr10	80771692	80771992	CiCo_mm9_circ_000678	300	+	ENSMUSG00000034902	Pip5k1c	+	1	.	NO
chr10	80824769	80825042	CiCo_mm9_circ_000679	186	+	ENSMUSG00000034854	Mfsd12	+	2	.	NO
chr10	80832942	80834199	CiCo_mm9_circ_000681	695	-	ENSMUSG00000020235	Fzr1	-	6	.	NO
chr10	80883011	80883543	CiCo_mm9_circ_000682	532	-	ENSMUSG00000055053	Nfic	-	1	.	NO
chr10	80950424	80951103	CiCo_mm9_circ_000683	297	-	ENSMUSG00000020238	Ncln	-	3	mm9_circ_006120	100
chr10	82217709	82224658	CiCo_mm9_circ_000684	306	-	ENSMUSG00000020248	Nfyb	-	3	.	NO
chr10	82969342	82971477	CiCo_mm9_circ_000687	399	-	ENSMUSG00000020256	Aldh1l2	-	3	.	NO
chr10	84321241	84358840	CiCo_mm9_circ_000688	1102	+	ENSMUSG00000020037	Rfx4	+	9	.	NO
chr10	84342914	84358840	CiCo_mm9_circ_000689	584	+	ENSMUSG00000020037	Rfx4	+	4	.	NO
chr10	84410156	84410765	CiCo_mm9_circ_000690	609	+	ENSMUSG00000035620	Ric8b	+	1	mm9_circ_004072	100
chr10	84410156	84420855	CiCo_mm9_circ_000691	704	+	ENSMUSG00000035620	Ric8b	+	2	mm9_circ_004072	<50
chr10	84420760	84442937	CiCo_mm9_circ_000692	565	+	ENSMUSG00000035620	Ric8b	+	4	.	NO
chr10	87863396	87877343	CiCo_mm9_circ_000694	454	+	ENSMUSG00000035311	Gnptab	+	4	.	NO
chr10	87874660	87882305	CiCo_mm9_circ_000695	568	+	ENSMUSG00000035311	Gnptab	+	5	.	NO
chr10	88225513	88255434	CiCo_mm9_circ_000696	3243	-	ENSMUSG00000004356	Utp20	-	23	.	NO
chr10	88271826	88272830	CiCo_mm9_circ_000697	262	-	ENSMUSG00000004356	Utp20	-	2	.	NO
chr10	88891774	88897106	CiCo_mm9_circ_000699	405	-	ENSMUSG00000074802	Gas2l3	-	4	.	NO
chr10	89187744	89191762	CiCo_mm9_circ_000700	558	-	ENSMUSG00000019948	Actr6	-	6	.	NO
chr10	89190898	89191762	CiCo_mm9_circ_000701	187	-	ENSMUSG00000019948	Actr6	-	2	.	NO
chr10	89249849	89257369	CiCo_mm9_circ_000702	709	+	ENSMUSG00000019951	Uhrf1bp1l	+	5	.	NO
chr10	89512560	89539887	CiCo_mm9_circ_000703	756	+	ENSMUSG00000058589	Anks1b	+	5	mm9_circ_011391	100
chr10	89532212	89539887	CiCo_mm9_circ_000704	459	+	ENSMUSG00000058589	Anks1b	+	4	mm9_circ_010626	100
chr10	89532212	89626049	CiCo_mm9_circ_000705	603	+	ENSMUSG00000058589	Anks1b	+	5	mm9_circ_009782	100
chr10	90384040	90384169	CiCo_mm9_circ_000706	129	+	ENSMUSG00000058589	Anks1b	+	1	mm9_circ_010003,mm9_circ_017958,mm9_circ_002573,mm9_circ_005340	<50
chr10	90384040	90411417	CiCo_mm9_circ_000707	366	+	ENSMUSG00000058589	Anks1b	+	4	mm9_circ_005340	75
chr10	90471868	90518773	CiCo_mm9_circ_000708	1405	-	ENSMUSG00000019979	Apaf1	-	11	.	NO
chr10	90614453	90628814	CiCo_mm9_circ_000710	800	-	ENSMUSG00000019961	Tmpo	-	7	.	NO
chr10	90621492	90628814	CiCo_mm9_circ_000711	384	-	ENSMUSG00000019961	Tmpo	-	3	.	NO
chr10	91537914	91538418	CiCo_mm9_circ_000712	504	-	.	Intergenic	.	1	mm9_circ_005214	<50
chr10	91546618	91599435	CiCo_mm9_circ_000718	1170	-	ENSMUSG00000086180	Rmst	-	9	mm9_circ_005214	75
chr10	91566450	91572478	CiCo_mm9_circ_000719	302	-	ENSMUSG00000086180	Rmst	-	2	mm9_circ_005214,mm9_circ_011291	<50
chr10	91566450	91599435	CiCo_mm9_circ_000720	961	-	ENSMUSG00000086180	Rmst	-	8	mm9_circ_011291	100
chr10	91572383	91599435	CiCo_mm9_circ_000721	754	-	ENSMUSG00000086180	Rmst	-	7	mm9_circ_011291	75
chr10	91595967	91599435	CiCo_mm9_circ_000722	659	-	ENSMUSG00000086180	Rmst	-	6	mm9_circ_005214,mm9_circ_011291	<50
chr10	91597708	91599435	CiCo_mm9_circ_000723	359	-	ENSMUSG00000086180	Rmst	-	3	mm9_circ_005214,mm9_circ_011291	<50
chr10	91597708	91624909	CiCo_mm9_circ_000724	419	-	ENSMUSG00000086180	Rmst	-	4	mm9_circ_005214,mm9_circ_011291	<50
chr10	92695124	92701788	CiCo_mm9_circ_000725	537	+	ENSMUSG00000020015	Cdk17	+	6	mm9_circ_018892	<50
chr10	93145162	93170149	CiCo_mm9_circ_000727	406	+	ENSMUSG00000020019	Ntn4	+	2	.	NO
chr10	93630154	93630302	CiCo_mm9_circ_000728	148	+	ENSMUSG00000005897	Nr2c1	+	1	.	NO
chr10	94200517	94213404	CiCo_mm9_circ_000729	794	+	ENSMUSG00000020024	Ccdc41	+	5	mm9_circ_004012	<50
chr10	94211685	94213404	CiCo_mm9_circ_000730	410	+	ENSMUSG00000020024	Ccdc41	+	3	mm9_circ_004012	100
chr10	94369098	94385404	CiCo_mm9_circ_000731	377	-	ENSMUSG00000074785	Plxnc1	-	3	.	NO
chr10	98431327	98431758	CiCo_mm9_circ_000732	431	+	ENSMUSG00000019943	Atp2b1	+	1	.	NO
chr10	98587464	98592296	CiCo_mm9_circ_000733	352	+	ENSMUSG00000019952	Poc1b	+	2	.	NO
chr10	98606868	98618985	CiCo_mm9_circ_000734	577	+	ENSMUSG00000019952	Poc1b	+	5	.	NO
chr10	98606868	98627583	CiCo_mm9_circ_000735	658	+	ENSMUSG00000019952	Poc1b	+	6	.	NO
chr11	100353818	100357278	CiCo_mm9_circ_000736	495	-	ENSMUSG00000020917	Acly	-	4	.	NO
chr11	100357173	100378220	CiCo_mm9_circ_000737	1229	-	ENSMUSG00000020917	Acly	-	10	.	NO
chr11	100366168	100378220	CiCo_mm9_circ_000739	722	-	ENSMUSG00000020917	Acly	-	6	.	NO
chr11	101329854	101330086	CiCo_mm9_circ_000740	232	+	.	Intergenic	.	1	.	NO
chr11	101366630	101369544	CiCo_mm9_circ_000741	369	-	ENSMUSG00000017146	Brca1	-	2	.	NO
chr11	101601017	101606567	CiCo_mm9_circ_000742	683	+	ENSMUSG00000034931	Dhx8	+	5	.	NO
chr11	101623522	101626271	CiCo_mm9_circ_000743	644	+	ENSMUSG00000034931	Dhx8	+	4	.	NO
chr11	102171504	102171890	CiCo_mm9_circ_000746	276	-	ENSMUSG00000020923	Ubtf	-	2	.	NO
chr11	102713070	102721440	CiCo_mm9_circ_000748	416	-	ENSMUSG00000020929	Eftud2	-	4	.	NO
chr11	102721315	102726974	CiCo_mm9_circ_000749	466	-	ENSMUSG00000020929	Eftud2	-	4	.	NO
chr11	102907692	102916603	CiCo_mm9_circ_000751	356	+	ENSMUSG00000020936	Nmt1	+	3	mm9_circ_017115	100
chr11	103771756	103777986	CiCo_mm9_circ_000752	507	-	ENSMUSG00000034187	Nsf	-	4	.	NO
chr11	103775114	103777986	CiCo_mm9_circ_000753	275	-	ENSMUSG00000034187	Nsf	-	2	.	NO
chr11	104203676	104240140	CiCo_mm9_circ_000754	1048	-	ENSMUSG00000018412	1700081L11Rik	-	7	mm9_circ_006509	75
chr11	104211800	104218910	CiCo_mm9_circ_000755	475	-	ENSMUSG00000018412	1700081L11Rik	-	3	mm9_circ_006509,mm9_circ_002521,mm9_circ_017714	<50
chr11	104211800	104240140	CiCo_mm9_circ_000756	716	-	ENSMUSG00000018412	1700081L11Rik	-	5	mm9_circ_006509	100
chr11	104217997	104240140	CiCo_mm9_circ_000757	550	-	ENSMUSG00000018412	1700081L11Rik	-	4	mm9_circ_017714	100
chr11	104229993	104240140	CiCo_mm9_circ_000758	241	-	ENSMUSG00000018412	1700081L11Rik	-	2	mm9_circ_006502	100
chr11	104285235	104286607	CiCo_mm9_circ_000759	1372	-	ENSMUSG00000018412	1700081L11Rik	-	1	mm9_circ_017136	100
chr11	104384036	104388291	CiCo_mm9_circ_000761	331	-	ENSMUSG00000020687	Cdc27	-	3	.	NO
chr11	104387364	104388291	CiCo_mm9_circ_000762	231	-	ENSMUSG00000020687	Cdc27	-	2	.	NO
chr11	104387364	104390752	CiCo_mm9_circ_000763	696	-	ENSMUSG00000020687	Cdc27	-	5	.	NO
chr11	105082499	105102975	CiCo_mm9_circ_000764	357	+	ENSMUSG00000020694	Tlk2	+	3	.	NO
chr11	105101674	105108909	CiCo_mm9_circ_000765	437	+	ENSMUSG00000020694	Tlk2	+	4	.	NO
chr11	105101674	105110951	CiCo_mm9_circ_000766	590	+	ENSMUSG00000020694	Tlk2	+	5	.	NO
chr11	105108087	105110951	CiCo_mm9_circ_000767	401	+	ENSMUSG00000020694	Tlk2	+	3	.	NO
chr11	105958304	105985220	CiCo_mm9_circ_000768	498	+	ENSMUSG00000020700	Map3k3	+	5	.	NO
chr11	105972057	105985220	CiCo_mm9_circ_000769	376	+	ENSMUSG00000020700	Map3k3	+	4	.	NO
chr11	105978803	105985220	CiCo_mm9_circ_000770	235	+	ENSMUSG00000020700	Map3k3	+	2	.	NO
chr11	106098308	106101413	CiCo_mm9_circ_000773	375	+	ENSMUSG00000020705	Ddx42	+	4	.	NO
chr11	106275664	106275783	CiCo_mm9_circ_000774	119	-	ENSMUSG00000020715	Ern1	-	1	.	NO
chr11	106275664	106275783	CiCo_mm9_circ_000775	119	-	ENSMUSG00000020715	Ern1	-	1	.	NO
chr11	106643570	106643782	CiCo_mm9_circ_000777	212	-	.	Intergenic	.	1	.	NO
chr11	106904946	106939112	CiCo_mm9_circ_000778	5745	-	ENSMUSG00000040481	Bptf	-	17	.	NO
chr11	106919947	106927410	CiCo_mm9_circ_000779	920	-	ENSMUSG00000040481	Bptf	-	6	.	NO
chr11	106957029	106961103	CiCo_mm9_circ_000780	434	-	ENSMUSG00000040481	Bptf	-	2	.	NO
chr11	106960879	106961103	CiCo_mm9_circ_000781	224	-	ENSMUSG00000040481	Bptf	-	1	.	NO
chr11	106972126	106972949	CiCo_mm9_circ_000782	823	-	ENSMUSG00000040481	Bptf	-	1	.	NO
chr11	107157512	107198874	CiCo_mm9_circ_000783	318	-	ENSMUSG00000040430	Pitpnc1	-	4	.	NO
chr11	107454019	107456509	CiCo_mm9_circ_000784	182	+	ENSMUSG00000020721	Helz	+	2	mm9_circ_007687	<50
chr11	107454019	107463822	CiCo_mm9_circ_000785	509	+	ENSMUSG00000020721	Helz	+	5	mm9_circ_007687	<50
chr11	107454019	107465677	CiCo_mm9_circ_000786	915	+	ENSMUSG00000020721	Helz	+	7	mm9_circ_007687	<50
chr11	107496293	107507547	CiCo_mm9_circ_000787	597	+	ENSMUSG00000020721	Helz	+	4	mm9_circ_007687	<50
chr11	108295439	108301910	CiCo_mm9_circ_000789	478	+	ENSMUSG00000020728	Ccdc46	+	3	.	NO
chr11	108295439	108359644	CiCo_mm9_circ_000790	860	+	ENSMUSG00000020728	Ccdc46	+	8	.	NO
chr11	108331605	108333408	CiCo_mm9_circ_000792	169	+	ENSMUSG00000020728	Ccdc46	+	2	.	NO
chr11	108452317	108452425	CiCo_mm9_circ_000793	108	+	ENSMUSG00000020728	Ccdc46	+	1	.	NO
chr11	108784465	108785416	CiCo_mm9_circ_000796	951	+	ENSMUSG00000000142	Axin2	+	1	mm9_circ_010014	<50
chr11	108784465	108792893	CiCo_mm9_circ_000797	1092	+	ENSMUSG00000000142	Axin2	+	2	mm9_circ_010014	100
chr11	113522256	113522532	CiCo_mm9_circ_000802	189	+	ENSMUSG00000018661	Cog1	+	2	.	NO
chr11	115786720	115789800	CiCo_mm9_circ_000805	737	-	ENSMUSG00000020752	Recql5	-	3	.	NO
chr11	11600207	11607907	CiCo_mm9_circ_000806	174	+	ENSMUSG00000018654	Ikzf1	+	2	.	NO
chr11	116035606	116041720	CiCo_mm9_circ_000807	1277	-	ENSMUSG00000020777	Acox1	-	8	.	NO
chr11	116042256	116043334	CiCo_mm9_circ_000808	228	-	ENSMUSG00000020777	Acox1	-	2	.	NO
chr11	116042256	116044938	CiCo_mm9_circ_000809	389	-	ENSMUSG00000020777	Acox1	-	3	.	NO
chr11	116112049	116123141	CiCo_mm9_circ_000810	545	-	ENSMUSG00000020780	Srp68	-	5	.	NO
chr11	116124173	116124611	CiCo_mm9_circ_000811	193	-	ENSMUSG00000020780	Srp68	-	2	mm9_circ_011501	100
chr11	116405419	116405549	CiCo_mm9_circ_000813	130	-	.	Intergenic	.	1	.	NO
chr11	117151711	117152350	CiCo_mm9_circ_000815	639	+	ENSMUSG00000059248	Sept9	+	1	.	NO
chr11	117562038	117575766	CiCo_mm9_circ_000817	449	+	ENSMUSG00000025571	Tnrc6c	+	3	.	NO
chr11	117562038	117584864	CiCo_mm9_circ_000818	3050	+	ENSMUSG00000025571	Tnrc6c	+	4	.	NO
chr11	117608490	117611131	CiCo_mm9_circ_000819	445	+	ENSMUSG00000025571	Tnrc6c	+	3	.	NO
chr11	117693841	117693890	CiCo_mm9_circ_000821	49	+	ENSMUSG00000093485	RP23-268N22.1	+	1	.	NO
chr11	11867534	11887677	CiCo_mm9_circ_000822	453	-	ENSMUSG00000020176	Grb10	-	3	.	NO
chr11	119012341	119015389	CiCo_mm9_circ_000824	367	-	ENSMUSG00000039976	Tbc1d16	-	2	.	NO
chr11	119070084	119072054	CiCo_mm9_circ_000825	834	-	ENSMUSG00000039976	Tbc1d16	-	2	.	NO
chr11	119103740	119104432	CiCo_mm9_circ_000826	403	+	ENSMUSG00000039963	Ccdc40	+	3	.	NO
chr11	119107481	119107664	CiCo_mm9_circ_000827	183	+	ENSMUSG00000039963	Ccdc40	+	1	.	NO
chr11	119605180	119617728	CiCo_mm9_circ_000829	323	+	ENSMUSG00000025583	Rptor	+	2	.	NO
chr11	119717580	119719308	CiCo_mm9_circ_000830	418	+	ENSMUSG00000025583	Rptor	+	3	.	NO
chr11	119989736	120002000	CiCo_mm9_circ_000832	868	-	ENSMUSG00000061306	Slc38a10	-	7	.	NO
chr11	120098173	120098571	CiCo_mm9_circ_000834	398	+	ENSMUSG00000039741	Bahcc1	+	1	.	NO
chr11	120119648	120119720	CiCo_mm9_circ_000835	72	+	.	Intergenic	.	1	.	NO
chr11	120282678	120294442	CiCo_mm9_circ_000836	371	-	ENSMUSG00000039703	Nploc4	-	3	.	NO
chr11	120673352	120673764	CiCo_mm9_circ_000838	330	-	ENSMUSG00000025153	Fasn	-	2	.	NO
chr11	120727868	120727990	CiCo_mm9_circ_000839	122	-	ENSMUSG00000048445	Ccdc57	-	1	.	NO
chr11	120727868	120765399	CiCo_mm9_circ_000840	922	-	ENSMUSG00000048445	Ccdc57	-	7	.	NO
chr11	120829308	120835283	CiCo_mm9_circ_000841	1010	-	ENSMUSG00000025162	Csnk1d	-	6	.	NO
chr11	120834279	120835283	CiCo_mm9_circ_000842	378	-	ENSMUSG00000025162	Csnk1d	-	2	.	NO
chr11	121358308	121361424	CiCo_mm9_circ_000844	279	+	ENSMUSG00000039230	Tbcd	+	3	.	NO
chr11	19898122	19908480	CiCo_mm9_circ_000846	412	+	ENSMUSG00000045671	Spred2	+	3	mm9_circ_005654	100
chr11	19977190	19980801	CiCo_mm9_circ_000847	433	-	ENSMUSG00000020152	Actr2	-	3	.	NO
chr11	19977190	19991370	CiCo_mm9_circ_000848	506	-	ENSMUSG00000020152	Actr2	-	4	.	NO
chr11	20592467	20608740	CiCo_mm9_circ_000849	365	-	ENSMUSG00000049659	Aftph	-	4	mm9_circ_009096,mm9_circ_016520	<50
chr11	20603713	20609749	CiCo_mm9_circ_000850	307	-	ENSMUSG00000049659	Aftph	-	3	mm9_circ_009096	100
chr11	20603713	20612318	CiCo_mm9_circ_000851	459	-	ENSMUSG00000049659	Aftph	-	4	mm9_circ_009096	50
chr11	20625687	20627642	CiCo_mm9_circ_000852	1955	-	ENSMUSG00000049659	Aftph	-	1	mm9_circ_005474	100
chr11	21163201	21164874	CiCo_mm9_circ_000854	398	+	ENSMUSG00000020128	Vps54	+	2	mm9_circ_017735	<50
chr11	21163201	21178063	CiCo_mm9_circ_000855	1030	+	ENSMUSG00000020128	Vps54	+	6	mm9_circ_017735	100
chr11	21648880	21648944	CiCo_mm9_circ_000856	64	+	ENSMUSG00000020319	Wdpcp	+	1	.	NO
chr11	21648880	21648944	CiCo_mm9_circ_000857	64	+	ENSMUSG00000020319	Wdpcp	+	1	.	NO
chr11	21757449	21757612	CiCo_mm9_circ_000858	163	+	ENSMUSG00000020319	Wdpcp	+	1	mm9_circ_001332	100
chr11	21913486	21968509	CiCo_mm9_circ_000859	916	-	ENSMUSG00000042302	Ehbp1	-	8	mm9_circ_008302	<50
chr11	21953434	21968509	CiCo_mm9_circ_000860	742	-	ENSMUSG00000042302	Ehbp1	-	6	mm9_circ_008302	100
chr11	22069037	22073009	CiCo_mm9_circ_000861	322	-	ENSMUSG00000042302	Ehbp1	-	2	.	NO
chr11	22132004	22139241	CiCo_mm9_circ_000862	150	-	ENSMUSG00000042302	Ehbp1	-	2	.	NO
chr11	22895929	22896457	CiCo_mm9_circ_000863	252	+	ENSMUSG00000007739	Cct4	+	2	.	NO
chr11	23161834	23171205	CiCo_mm9_circ_000864	307	+	ENSMUSG00000020290	Xpo1	+	3	mm9_circ_017722	100
chr11	23161834	23178925	CiCo_mm9_circ_000865	765	+	ENSMUSG00000020290	Xpo1	+	8	mm9_circ_017722	50
chr11	23176426	23178925	CiCo_mm9_circ_000866	458	+	ENSMUSG00000020290	Xpo1	+	5	.	NO
chr11	23178805	23182726	CiCo_mm9_circ_000867	606	+	ENSMUSG00000020290	Xpo1	+	4	.	NO
chr11	23185800	23185935	CiCo_mm9_circ_000868	135	+	ENSMUSG00000020290	Xpo1	+	1	.	NO
chr11	23301452	23305953	CiCo_mm9_circ_000869	420	+	ENSMUSG00000056342	Usp34	+	4	.	NO
chr11	23303559	23305953	CiCo_mm9_circ_000870	294	+	ENSMUSG00000056342	Usp34	+	3	.	NO
chr11	23332245	23336079	CiCo_mm9_circ_000871	550	+	ENSMUSG00000056342	Usp34	+	5	.	NO
chr11	23607522	23625574	CiCo_mm9_circ_000875	774	+	ENSMUSG00000020280	Pus10	+	9	.	NO
chr11	23985320	23985650	CiCo_mm9_circ_000876	330	+	ENSMUSG00000000861	Bcl11a	+	1	.	NO
chr11	26297745	26334500	CiCo_mm9_circ_000881	444	+	ENSMUSG00000004018	Fancl	+	6	mm9_circ_007924	100
chr11	26322407	26334500	CiCo_mm9_circ_000883	166	+	ENSMUSG00000004018	Fancl	+	2	mm9_circ_007924	<50
chr11	26322407	26359836	CiCo_mm9_circ_000884	317	+	ENSMUSG00000004018	Fancl	+	3	mm9_circ_007924	<50
chr11	26389772	26389893	CiCo_mm9_circ_000885	121	-	ENSMUSG00000064090	Vrk2	-	1	.	NO
chr11	26449294	26450075	CiCo_mm9_circ_000886	120	-	ENSMUSG00000064090	Vrk2	-	2	.	NO
chr11	29098792	29100803	CiCo_mm9_circ_000888	235	+	ENSMUSG00000020463	Smek2	+	2	.	NO
chr11	29300183	29330252	CiCo_mm9_circ_000889	463	+	ENSMUSG00000032740	Ccdc88a	+	5	.	NO
chr11	29322539	29330252	CiCo_mm9_circ_000890	354	+	ENSMUSG00000032740	Ccdc88a	+	4	.	NO
chr11	29393699	29394093	CiCo_mm9_circ_000891	308	+	ENSMUSG00000032740	Ccdc88a	+	2	.	NO
chr11	29433225	29438793	CiCo_mm9_circ_000892	775	+	ENSMUSG00000020459	Mtif2	+	5	mm9_circ_008729	<50
chr11	29436832	29441481	CiCo_mm9_circ_000893	864	+	ENSMUSG00000020459	Mtif2	+	5	mm9_circ_008729	50
chr11	29605534	29608770	CiCo_mm9_circ_000894	2418	+	ENSMUSG00000020458	Rtn4	+	2	mm9_circ_014561	100
chr11	29633632	29633840	CiCo_mm9_circ_000895	208	+	ENSMUSG00000020458	Rtn4	+	1	.	NO
chr11	29685666	29685755	CiCo_mm9_circ_000896	89	-	ENSMUSG00000044072	Eml6	-	1	.	NO
chr11	3040139	3045325	CiCo_mm9_circ_000897	614	-	ENSMUSG00000023764	Sfi1	-	6	.	NO
chr11	30691091	30692038	CiCo_mm9_circ_000898	258	+	ENSMUSG00000040850	Psme4	+	2	.	NO
chr11	30691091	30702858	CiCo_mm9_circ_000899	303	+	ENSMUSG00000040850	Psme4	+	3	.	NO
chr11	30834671	30839621	CiCo_mm9_circ_000900	279	-	ENSMUSG00000020311	Erlec1	-	3	.	NO
chr11	30955457	30961586	CiCo_mm9_circ_000901	625	+	ENSMUSG00000020305	Asb3	+	4	.	NO
chr11	3120246	3121297	CiCo_mm9_circ_000902	489	+	ENSMUSG00000020454	Eif4enif1	+	2	.	NO
chr11	3121095	3121297	CiCo_mm9_circ_000903	202	+	ENSMUSG00000020454	Eif4enif1	+	1	.	NO
chr11	3152646	3164893	CiCo_mm9_circ_000904	839	-	ENSMUSG00000020457	Drg1	-	6	.	NO
chr11	3162491	3164893	CiCo_mm9_circ_000905	300	-	ENSMUSG00000020457	Drg1	-	2	.	NO
chr11	32399224	32399461	CiCo_mm9_circ_000908	237	+	ENSMUSG00000044949	Ubtd2	+	1	.	NO
chr11	32552747	32552904	CiCo_mm9_circ_000909	157	+	ENSMUSG00000020271	Fbxw11	+	1	.	NO
chr11	35589587	35595209	CiCo_mm9_circ_000911	908	+	ENSMUSG00000018846	Pank3	+	4	.	NO
chr11	35665695	35666979	CiCo_mm9_circ_000912	283	-	ENSMUSG00000018849	Wwc1	-	2	.	NO
chr11	35680736	35682685	CiCo_mm9_circ_000913	280	-	ENSMUSG00000018849	Wwc1	-	2	.	NO
chr11	36020406	36035032	CiCo_mm9_circ_000914	329	-	ENSMUSG00000049336	Odz2	-	2	.	NO
chr11	36198620	36198830	CiCo_mm9_circ_000916	210	-	ENSMUSG00000049336	Odz2	-	1	.	NO
chr11	4035968	4036179	CiCo_mm9_circ_000919	211	+	.	Intergenic	.	1	.	NO
chr11	40517283	40519570	CiCo_mm9_circ_000920	331	-	ENSMUSG00000020330	Hmmr	-	2	.	NO
chr11	43518035	43518979	CiCo_mm9_circ_000922	944	+	ENSMUSG00000044950	Pwwp2a	+	1	mm9_circ_012559	100
chr11	43518035	43518979	CiCo_mm9_circ_000923	944	+	ENSMUSG00000044950	Pwwp2a	+	1	mm9_circ_012559	<50
chr11	43553218	43558949	CiCo_mm9_circ_000924	537	-	ENSMUSG00000041278	Ttc1	-	3	.	NO
chr11	43558586	43558949	CiCo_mm9_circ_000925	363	-	ENSMUSG00000041278	Ttc1	-	1	.	NO
chr11	4417743	4431308	CiCo_mm9_circ_000926	541	-	ENSMUSG00000034354	Mtmr3	-	5	.	NO
chr11	4417743	4431308	CiCo_mm9_circ_000927	541	-	ENSMUSG00000034354	Mtmr3	-	5	.	NO
chr11	4427838	4431308	CiCo_mm9_circ_000928	291	-	ENSMUSG00000034354	Mtmr3	-	3	.	NO
chr11	4427838	4431308	CiCo_mm9_circ_000929	291	-	ENSMUSG00000034354	Mtmr3	-	3	.	NO
chr11	44338429	44356222	CiCo_mm9_circ_000930	417	+	ENSMUSG00000019189	Rnf145	+	3	.	NO
chr11	4546564	4549872	CiCo_mm9_circ_000931	460	+	ENSMUSG00000020412	Ascc2	+	3	.	NO
chr11	4549742	4556339	CiCo_mm9_circ_000932	198	+	ENSMUSG00000020412	Ascc2	+	2	.	NO
chr11	45697211	45708631	CiCo_mm9_circ_000935	971	+	ENSMUSG00000006169	Clint1	+	7	.	NO
chr11	46034837	46037707	CiCo_mm9_circ_000937	366	-	ENSMUSG00000020340	Cyfip2	-	3	.	NO
chr11	4699863	4720496	CiCo_mm9_circ_000939	696	-	ENSMUSG00000009073	Nf2	-	7	.	NO
chr11	4703680	4720496	CiCo_mm9_circ_000940	561	-	ENSMUSG00000009073	Nf2	-	6	.	NO
chr11	4716084	4720496	CiCo_mm9_circ_000941	333	-	ENSMUSG00000009073	Nf2	-	3	.	NO
chr11	48622551	48622782	CiCo_mm9_circ_000942	231	-	ENSMUSG00000040365	Trim41	-	1	.	NO
chr11	49866277	49884923	CiCo_mm9_circ_000944	446	+	ENSMUSG00000020376	Rnf130	+	2	.	NO
chr11	49899242	49909482	CiCo_mm9_circ_000945	457	+	ENSMUSG00000020376	Rnf130	+	4	.	NO
chr11	49899242	49912841	CiCo_mm9_circ_000946	551	+	ENSMUSG00000020376	Rnf130	+	5	.	NO
chr11	50074478	50080512	CiCo_mm9_circ_000948	1747	-	ENSMUSG00000050567	Maml1	-	3	.	NO
chr11	50076751	50080512	CiCo_mm9_circ_000949	1650	-	ENSMUSG00000050567	Maml1	-	2	.	NO
chr11	50110559	50114556	CiCo_mm9_circ_000950	694	-	ENSMUSG00000020368	Canx	-	5	mm9_circ_015101	<50
chr11	50112630	50114556	CiCo_mm9_circ_000951	373	-	ENSMUSG00000020368	Canx	-	2	mm9_circ_015101	100
chr11	50115259	50122431	CiCo_mm9_circ_000952	721	-	ENSMUSG00000020368	Canx	-	5	mm9_circ_015102	<50
chr11	50117827	50122431	CiCo_mm9_circ_000953	607	-	ENSMUSG00000020368	Canx	-	4	mm9_circ_015102	<50
chr11	50120971	50122431	CiCo_mm9_circ_000954	417	-	ENSMUSG00000020368	Canx	-	3	mm9_circ_015102	<50
chr11	50120971	50124369	CiCo_mm9_circ_000955	550	-	ENSMUSG00000020368	Canx	-	5	mm9_circ_015102	100
chr11	50123873	50125286	CiCo_mm9_circ_000956	314	-	ENSMUSG00000020368	Canx	-	3	mm9_circ_015102	<50
chr11	51085301	51089749	CiCo_mm9_circ_000960	890	+	ENSMUSG00000020385	Clk4	+	7	.	NO
chr11	5115409	5143940	CiCo_mm9_circ_000961	380	-	ENSMUSG00000020393	Kremen1	-	3	.	NO
chr11	51415251	51415392	CiCo_mm9_circ_000962	141	-	ENSMUSG00000020358	Hnrnpab	-	1	.	NO
chr11	51926621	51932806	CiCo_mm9_circ_000964	636	+	ENSMUSG00000020349	Ppp2ca	+	4	.	NO
chr11	51926621	51934553	CiCo_mm9_circ_000965	755	+	ENSMUSG00000020349	Ppp2ca	+	5	.	NO
chr11	51931488	51932806	CiCo_mm9_circ_000967	426	+	ENSMUSG00000020349	Ppp2ca	+	3	.	NO
chr11	51931488	51934553	CiCo_mm9_circ_000968	545	+	ENSMUSG00000020349	Ppp2ca	+	4	.	NO
chr11	52050338	52058623	CiCo_mm9_circ_000969	456	+	ENSMUSG00000036309	Skp1a	+	4	.	NO
chr11	53093969	53102666	CiCo_mm9_circ_000971	743	-	ENSMUSG00000020361	Hspa4	-	5	mm9_circ_011514	50
chr11	53097601	53102666	CiCo_mm9_circ_000972	364	-	ENSMUSG00000020361	Hspa4	-	3	mm9_circ_011514	50
chr11	53100354	53105816	CiCo_mm9_circ_000973	322	-	ENSMUSG00000020361	Hspa4	-	3	mm9_circ_011514	50
chr11	53213090	53216068	CiCo_mm9_circ_000976	1007	+	ENSMUSG00000049470	Aff4	+	2	.	NO
chr11	53350988	53351417	CiCo_mm9_circ_000977	324	+	ENSMUSG00000018398	Sept8	+	2	.	NO
chr11	53512323	53515610	CiCo_mm9_circ_000978	338	-	ENSMUSG00000020380	Rad50	-	2	.	NO
chr11	54357080	54381998	CiCo_mm9_circ_000980	426	+	ENSMUSG00000037533	Rapgef6	+	5	.	NO
chr11	54366291	54381998	CiCo_mm9_circ_000981	298	+	ENSMUSG00000037533	Rapgef6	+	3	.	NO
chr11	54553739	54554052	CiCo_mm9_circ_000982	313	-	ENSMUSG00000052298	Cdc42se2	-	1	.	NO
chr11	54553739	54570061	CiCo_mm9_circ_000983	467	-	ENSMUSG00000052298	Cdc42se2	-	2	.	NO
chr11	57303611	57327790	CiCo_mm9_circ_000984	1310	-	ENSMUSG00000020523	Fam114a2	-	11	.	NO
chr11	57303611	57327793	CiCo_mm9_circ_000985	1313	-	ENSMUSG00000020523	Fam114a2	-	11	.	NO
chr11	57326743	57327790	CiCo_mm9_circ_000986	387	-	ENSMUSG00000020523	Fam114a2	-	3	.	NO
chr11	57534796	57539163	CiCo_mm9_circ_000987	242	+	ENSMUSG00000020520	Galnt10	+	2	.	NO
chr11	57855937	57856144	CiCo_mm9_circ_000988	207	+	ENSMUSG00000037331	Larp1	+	1	.	NO
chr11	59241842	59242315	CiCo_mm9_circ_000991	473	-	ENSMUSG00000009894	S.p47	-	1	.	NO
chr11	60074556	60076285	CiCo_mm9_circ_000997	294	-	ENSMUSG00000000538	Tom1l2	-	2	mm9_circ_000592	<50
chr11	60083819	60088504	CiCo_mm9_circ_000998	229	-	ENSMUSG00000000538	Tom1l2	-	2	mm9_circ_003952	100
chr11	60083819	60093785	CiCo_mm9_circ_000999	314	-	ENSMUSG00000000538	Tom1l2	-	3	mm9_circ_003952,mm9_circ_000592	<50
chr11	6013245	6025564	CiCo_mm9_circ_001000	333	-	ENSMUSG00000053838	Nudcd3	-	2	.	NO
chr11	60270052	60273590	CiCo_mm9_circ_001001	312	+	ENSMUSG00000020537	Drg2	+	3	.	NO
chr11	60518352	60519624	CiCo_mm9_circ_001003	287	+	ENSMUSG00000020536	Llgl1	+	2	.	NO
chr11	60519694	60519857	CiCo_mm9_circ_001004	163	+	ENSMUSG00000020536	Llgl1	+	1	mm9_circ_003880	100
chr11	60519694	60520075	CiCo_mm9_circ_001005	299	+	ENSMUSG00000020536	Llgl1	+	2	mm9_circ_003880	<50
chr11	60559318	60563091	CiCo_mm9_circ_001006	740	-	ENSMUSG00000002814	Top3a	-	5	.	NO
chr11	60561367	60563091	CiCo_mm9_circ_001007	596	-	ENSMUSG00000002814	Top3a	-	4	.	NO
chr11	6093156	6093479	CiCo_mm9_circ_001008	323	-	ENSMUSG00000053838	Nudcd3	-	1	mm9_circ_005786	100
chr11	61335907	61336695	CiCo_mm9_circ_001009	252	-	ENSMUSG00000001036	Epn2	-	2	.	NO
chr11	61346019	61348885	CiCo_mm9_circ_001010	435	-	ENSMUSG00000001036	Epn2	-	4	.	NO
chr11	61595093	61617289	CiCo_mm9_circ_001011	1624	-	ENSMUSG00000004798	Ulk2	-	10	.	NO
chr11	61600930	61605085	CiCo_mm9_circ_001012	359	-	ENSMUSG00000004798	Ulk2	-	2	.	NO
chr11	61632786	61654833	CiCo_mm9_circ_001013	871	-	ENSMUSG00000004798	Ulk2	-	10	.	NO
chr11	61723349	61729768	CiCo_mm9_circ_001014	840	-	ENSMUSG00000047804	Akap10	-	3	.	NO
chr11	61959807	61975412	CiCo_mm9_circ_001018	586	+	ENSMUSG00000042331	Specc1	+	5	mm9_circ_001346	100
chr11	6213790	6213982	CiCo_mm9_circ_001021	192	+	ENSMUSG00000020456	Ogdh	+	1	mm9_circ_008777,mm9_circ_001335	<50
chr11	6213790	6217083	CiCo_mm9_circ_001022	295	+	ENSMUSG00000020456	Ogdh	+	2	mm9_circ_001335	100
chr11	62149641	62149766	CiCo_mm9_circ_001023	125	-	.	Intergenic	.	1	.	NO
chr11	62190136	62192156	CiCo_mm9_circ_001024	267	-	ENSMUSG00000018501	Ncor1	-	2	.	NO
chr11	62196662	62204535	CiCo_mm9_circ_001025	497	-	ENSMUSG00000018501	Ncor1	-	4	.	NO
chr11	65509789	65525799	CiCo_mm9_circ_001028	378	-	ENSMUSG00000033352	Map2k4	-	4	mm9_circ_007877	<50
chr11	65520485	65525799	CiCo_mm9_circ_001029	300	-	ENSMUSG00000033352	Map2k4	-	3	mm9_circ_007877	100
chr11	65520485	65548868	CiCo_mm9_circ_001030	595	-	ENSMUSG00000033352	Map2k4	-	5	mm9_circ_007877	<50
chr11	68605536	68606529	CiCo_mm9_circ_001031	993	+	.	Intergenic	.	1	.	NO
chr11	69454783	69455091	CiCo_mm9_circ_001035	221	+	ENSMUSG00000018765	Fxr2	+	2	.	NO
chr11	69463229	69465225	CiCo_mm9_circ_001036	825	+	ENSMUSG00000018765	Fxr2	+	5	mm9_circ_005799	100
chr11	69463964	69465225	CiCo_mm9_circ_001037	715	+	ENSMUSG00000018765	Fxr2	+	4	mm9_circ_005799	50
chr11	70688247	70698470	CiCo_mm9_circ_001042	333	+	ENSMUSG00000020817	Rabep1	+	2	mm9_circ_001848	100
chr11	70688247	70700673	CiCo_mm9_circ_001043	494	+	ENSMUSG00000020817	Rabep1	+	3	mm9_circ_001327	100
chr11	70713973	70718285	CiCo_mm9_circ_001044	315	+	ENSMUSG00000020817	Rabep1	+	2	mm9_circ_008094	50
chr11	70730816	70731284	CiCo_mm9_circ_001045	468	+	ENSMUSG00000020817	Rabep1	+	1	mm9_circ_015723	<50
chr11	70730816	70739414	CiCo_mm9_circ_001046	930	+	ENSMUSG00000020817	Rabep1	+	5	mm9_circ_015723	100
chr11	70732678	70734470	CiCo_mm9_circ_001047	222	+	ENSMUSG00000020817	Rabep1	+	2	mm9_circ_015723	<50
chr11	71573079	71585476	CiCo_mm9_circ_001048	1111	+	ENSMUSG00000020811	Wscd1	+	4	.	NO
chr11	72459038	72486559	CiCo_mm9_circ_001052	317	+	ENSMUSG00000020794	Ube2g1	+	3	.	NO
chr11	72542262	72545915	CiCo_mm9_circ_001054	440	+	ENSMUSG00000020790	Ankfy1	+	3	.	NO
chr11	72706763	72708787	CiCo_mm9_circ_001057	291	+	ENSMUSG00000055670	Zzef1	+	2	.	NO
chr11	74597559	74601197	CiCo_mm9_circ_001058	341	+	ENSMUSG00000010554	Mettl16	+	2	.	NO
chr11	74597559	74609626	CiCo_mm9_circ_001059	600	+	ENSMUSG00000010554	Mettl16	+	4	.	NO
chr11	74649864	74651225	CiCo_mm9_circ_001061	740	+	ENSMUSG00000000282	Mnt	+	3	.	NO
chr11	74649864	74655855	CiCo_mm9_circ_001062	933	+	ENSMUSG00000000282	Mnt	+	4	.	NO
chr11	74759023	74803717	CiCo_mm9_circ_001064	532	+	ENSMUSG00000038290	Smg6	+	4	mm9_circ_017983	50
chr11	74795353	74803717	CiCo_mm9_circ_001065	208	+	ENSMUSG00000038290	Smg6	+	2	mm9_circ_017983	<50
chr11	74852114	74855538	CiCo_mm9_circ_001066	286	+	ENSMUSG00000038290	Smg6	+	2	.	NO
chr11	74867263	74867465	CiCo_mm9_circ_001067	202	+	ENSMUSG00000038290	Smg6	+	1	.	NO
chr11	75356659	75358239	CiCo_mm9_circ_001069	264	+	ENSMUSG00000038178	Slc43a2	+	2	mm9_circ_018417	100
chr11	75565382	75572930	CiCo_mm9_circ_001071	651	+	ENSMUSG00000020849	Ywhae	+	4	.	NO
chr11	75570318	75572930	CiCo_mm9_circ_001072	344	+	ENSMUSG00000020849	Ywhae	+	2	.	NO
chr11	75889936	75896186	CiCo_mm9_circ_001074	553	-	ENSMUSG00000017288	Vps53	-	4	.	NO
chr11	76046523	76046817	CiCo_mm9_circ_001075	201	-	ENSMUSG00000017286	Glod4	-	2	.	NO
chr11	76613290	76622379	CiCo_mm9_circ_001076	694	-	ENSMUSG00000020841	Cpd	-	5	.	NO
chr11	77206551	77221749	CiCo_mm9_circ_001077	291	+	ENSMUSG00000037926	Ssh2	+	3	.	NO
chr11	77238802	77255560	CiCo_mm9_circ_001078	618	+	ENSMUSG00000037926	Ssh2	+	5	.	NO
chr11	77287081	77290018	CiCo_mm9_circ_001079	404	-	ENSMUSG00000037907	Ankrd13b	-	4	.	NO
chr11	77362773	77364502	CiCo_mm9_circ_001082	333	-	ENSMUSG00000017291	Taok1	-	2	.	NO
chr11	77369065	77398996	CiCo_mm9_circ_001083	1428	-	ENSMUSG00000017291	Taok1	-	12	mm9_circ_000973	<50
chr11	77385108	77398996	CiCo_mm9_circ_001084	745	-	ENSMUSG00000017291	Taok1	-	7	mm9_circ_000973	100
chr11	77590736	77591816	CiCo_mm9_circ_001086	1080	+	ENSMUSG00000000631	Myo18a	+	1	.	NO
chr11	77820228	77823296	CiCo_mm9_circ_001087	467	+	ENSMUSG00000037791	Phf12	+	2	mm9_circ_016682	100
chr11	77822902	77823296	CiCo_mm9_circ_001088	394	+	ENSMUSG00000037791	Phf12	+	1	mm9_circ_016682	<50
chr11	77826672	77829132	CiCo_mm9_circ_001089	254	+	ENSMUSG00000037791	Phf12	+	2	.	NO
chr11	77826672	77831731	CiCo_mm9_circ_001090	419	+	ENSMUSG00000037791	Phf12	+	3	.	NO
chr11	77826672	77840920	CiCo_mm9_circ_001091	1740	+	ENSMUSG00000037791	Phf12	+	8	.	NO
chr11	78042130	78043015	CiCo_mm9_circ_001092	350	-	ENSMUSG00000002052	Supt6h	-	3	.	NO
chr11	78126616	78127441	CiCo_mm9_circ_001094	423	+	ENSMUSG00000002055	Spag5	+	4	.	NO
chr11	78133487	78135268	CiCo_mm9_circ_001095	713	+	ENSMUSG00000002055	Spag5	+	7	.	NO
chr11	78148928	78150332	CiCo_mm9_circ_001096	351	+	ENSMUSG00000041958	Pigs	+	2	mm9_circ_003535	<50
chr11	78388342	78396926	CiCo_mm9_circ_001097	189	-	ENSMUSG00000017376	Nlk	-	2	.	NO
chr11	79197676	79203901	CiCo_mm9_circ_001098	419	+	ENSMUSG00000020716	Nf1	+	3	.	NO
chr11	79232053	79289385	CiCo_mm9_circ_001099	3581	+	ENSMUSG00000020716	Nf1	+	25	.	NO
chr11	79282218	79289385	CiCo_mm9_circ_001100	662	+	ENSMUSG00000020716	Nf1	+	5	.	NO
chr11	79350294	79359914	CiCo_mm9_circ_001101	879	+	ENSMUSG00000020716	Nf1	+	4	.	NO
chr11	79433130	79434057	CiCo_mm9_circ_001102	177	+	ENSMUSG00000017639	Rab11fip4	+	2	.	NO
chr11	79764271	79765182	CiCo_mm9_circ_001104	164	-	ENSMUSG00000035575	Utp6	-	2	.	NO
chr11	79833180	79835771	CiCo_mm9_circ_001105	284	+	ENSMUSG00000017548	Suz12	+	2	.	NO
chr11	79838669	79839456	CiCo_mm9_circ_001106	302	+	ENSMUSG00000017548	Suz12	+	2	.	NO
chr11	80046883	80047532	CiCo_mm9_circ_001107	211	+	ENSMUSG00000017686	Rhot1	+	2	.	NO
chr11	80063709	80064628	CiCo_mm9_circ_001108	215	+	ENSMUSG00000017686	Rhot1	+	2	mm9_circ_014955	100
chr11	80133059	80151089	CiCo_mm9_circ_001109	747	+	ENSMUSG00000017692	Rhbdl3	+	5	.	NO
chr11	80144058	80151089	CiCo_mm9_circ_001110	363	+	ENSMUSG00000017692	Rhbdl3	+	3	.	NO
chr11	80207787	80217164	CiCo_mm9_circ_001111	901	+	ENSMUSG00000017421	Zfp207	+	8	.	NO
chr11	83178296	83183284	CiCo_mm9_circ_001113	465	+	ENSMUSG00000035152	Ap2b1	+	4	.	NO
chr11	83203204	83204283	CiCo_mm9_circ_001114	172	+	ENSMUSG00000035152	Ap2b1	+	2	.	NO
chr11	83298152	83300915	CiCo_mm9_circ_001115	431	+	ENSMUSG00000020680	Taf15	+	4	.	NO
chr11	83300724	83300915	CiCo_mm9_circ_001116	191	+	ENSMUSG00000020680	Taf15	+	1	.	NO
chr11	83314616	83316354	CiCo_mm9_circ_001117	223	+	ENSMUSG00000020680	Taf15	+	2	.	NO
chr11	83761946	83763196	CiCo_mm9_circ_001126	256	+	ENSMUSG00000020677	Ddx52	+	2	.	NO
chr11	8378227	8379668	CiCo_mm9_circ_001127	360	-	ENSMUSG00000020422	Tns3	-	3	mm9_circ_005801	100
chr11	83807830	83815737	CiCo_mm9_circ_001128	310	+	ENSMUSG00000034940	Synrg	+	3	.	NO
chr11	83833092	83840268	CiCo_mm9_circ_001129	827	+	ENSMUSG00000034940	Synrg	+	5	.	NO
chr11	8392095	8393340	CiCo_mm9_circ_001130	1245	-	ENSMUSG00000020422	Tns3	-	1	.	NO
chr11	84006580	84009189	CiCo_mm9_circ_001131	297	+	ENSMUSG00000020532	Acaca	+	2	mm9_circ_010321	100
chr11	84027659	84029474	CiCo_mm9_circ_001132	272	+	ENSMUSG00000020532	Acaca	+	2	.	NO
chr11	84036643	84045263	CiCo_mm9_circ_001133	509	+	ENSMUSG00000020532	Acaca	+	5	.	NO
chr11	8418201	8419573	CiCo_mm9_circ_001134	301	-	ENSMUSG00000020422	Tns3	-	3	mm9_circ_000787	100
chr11	8418201	8432512	CiCo_mm9_circ_001135	551	-	ENSMUSG00000020422	Tns3	-	6	mm9_circ_000787	<50
chr11	84667555	84674300	CiCo_mm9_circ_001136	593	-	ENSMUSG00000020530	Ggnbp2	-	4	.	NO
chr11	84708051	84710713	CiCo_mm9_circ_001137	291	+	ENSMUSG00000020527	Myo19	+	3	.	NO
chr11	84805954	84806243	CiCo_mm9_circ_001138	289	-	ENSMUSG00000000804	Usp32	-	1	.	NO
chr11	84863888	84864776	CiCo_mm9_circ_001139	146	-	ENSMUSG00000000804	Usp32	-	2	.	NO
chr11	85027737	85030026	CiCo_mm9_circ_001140	365	-	ENSMUSG00000018481	Appbp2	-	3	mm9_circ_003089	<50
chr11	85140365	85153298	CiCo_mm9_circ_001141	788	+	ENSMUSG00000020525	Ppm1d	+	4	.	NO
chr11	85309329	85323194	CiCo_mm9_circ_001142	399	+	ENSMUSG00000059439	Bcas3	+	2	.	NO
chr11	85370824	85397496	CiCo_mm9_circ_001143	663	+	ENSMUSG00000059439	Bcas3	+	5	.	NO
chr11	86098614	86098834	CiCo_mm9_circ_001145	220	-	ENSMUSG00000034297	Med13	-	1	.	NO
chr11	86111781	86122414	CiCo_mm9_circ_001146	1835	-	ENSMUSG00000034297	Med13	-	7	.	NO
chr11	86114151	86115057	CiCo_mm9_circ_001147	503	-	ENSMUSG00000034297	Med13	-	3	.	NO
chr11	86141303	86145530	CiCo_mm9_circ_001148	813	-	ENSMUSG00000034297	Med13	-	5	.	NO
chr11	86159361	86159530	CiCo_mm9_circ_001149	169	-	ENSMUSG00000034297	Med13	-	1	.	NO
chr11	86543712	86544333	CiCo_mm9_circ_001151	288	-	ENSMUSG00000047126	Cltc	-	2	.	NO
chr11	86606663	86611256	CiCo_mm9_circ_001152	232	-	ENSMUSG00000018425	Dhx40	-	2	mm9_circ_007869	<50
chr11	86851332	86859376	CiCo_mm9_circ_001154	403	-	ENSMUSG00000061666	Gdpd1	-	4	.	NO
chr11	86851332	86873062	CiCo_mm9_circ_001155	585	-	ENSMUSG00000061666	Gdpd1	-	6	.	NO
chr11	86855289	86859376	CiCo_mm9_circ_001156	343	-	ENSMUSG00000061666	Gdpd1	-	3	.	NO
chr11	86855289	86873062	CiCo_mm9_circ_001157	525	-	ENSMUSG00000061666	Gdpd1	-	5	.	NO
chr11	86858628	86873062	CiCo_mm9_circ_001158	391	-	ENSMUSG00000061666	Gdpd1	-	4	.	NO
chr11	86912164	86912975	CiCo_mm9_circ_001159	215	-	ENSMUSG00000020493	Prr11	-	2	.	NO
chr11	86958965	86960559	CiCo_mm9_circ_001161	247	+	ENSMUSG00000018548	Trim37	+	2	mm9_circ_004724	<50
chr11	86958965	86962865	CiCo_mm9_circ_001162	315	+	ENSMUSG00000018548	Trim37	+	3	mm9_circ_004724	50
chr11	86958965	86981018	CiCo_mm9_circ_001163	650	+	ENSMUSG00000018548	Trim37	+	7	mm9_circ_004724,mm9_circ_014957	<50
chr11	86958965	87000017	CiCo_mm9_circ_001164	1301	+	ENSMUSG00000018548	Trim37	+	11	mm9_circ_004724,mm9_circ_014957	<50
chr11	86960435	86962865	CiCo_mm9_circ_001165	192	+	ENSMUSG00000018548	Trim37	+	2	mm9_circ_004724	100
chr11	86973322	86981018	CiCo_mm9_circ_001166	335	+	ENSMUSG00000018548	Trim37	+	4	mm9_circ_014957	<50
chr11	86998385	87000017	CiCo_mm9_circ_001167	356	+	ENSMUSG00000018548	Trim37	+	2	.	NO
chr11	87886558	87889876	CiCo_mm9_circ_001172	943	+	ENSMUSG00000018377	Vezf1	+	3	mm9_circ_015947	50
chr11	87886558	87892057	CiCo_mm9_circ_001173	1096	+	ENSMUSG00000018377	Vezf1	+	4	mm9_circ_015947	100
chr11	87983066	87983676	CiCo_mm9_circ_001174	610	+	ENSMUSG00000018378	Cuedc1	+	1	mm9_circ_011664	100
chr11	87983066	87990899	CiCo_mm9_circ_001175	738	+	ENSMUSG00000018378	Cuedc1	+	2	mm9_circ_011664	<50
chr11	88903475	88911214	CiCo_mm9_circ_001179	366	-	ENSMUSG00000000276	Dgke	-	4	.	NO
chr11	93766472	93771720	CiCo_mm9_circ_001180	458	+	ENSMUSG00000059474	Mbtd1	+	3	mm9_circ_012849	50
chr11	93766472	93773772	CiCo_mm9_circ_001181	541	+	ENSMUSG00000059474	Mbtd1	+	4	mm9_circ_012849	100
chr11	93770117	93771720	CiCo_mm9_circ_001185	258	+	ENSMUSG00000059474	Mbtd1	+	2	mm9_circ_012849	<50
chr11	93897913	93904980	CiCo_mm9_circ_001186	166	+	ENSMUSG00000020859	Spag9	+	2	.	NO
chr11	93904885	93909872	CiCo_mm9_circ_001187	246	+	ENSMUSG00000020859	Spag9	+	2	.	NO
chr11	93929206	93933000	CiCo_mm9_circ_001188	430	+	ENSMUSG00000020859	Spag9	+	3	.	NO
chr11	93958531	93960466	CiCo_mm9_circ_001189	541	+	ENSMUSG00000020859	Spag9	+	3	.	NO
chr11	93958531	93961501	CiCo_mm9_circ_001190	622	+	ENSMUSG00000020859	Spag9	+	4	.	NO
chr11	93958531	93963472	CiCo_mm9_circ_001191	690	+	ENSMUSG00000020859	Spag9	+	5	.	NO
chr11	93958531	93969940	CiCo_mm9_circ_001192	1011	+	ENSMUSG00000020859	Spag9	+	7	.	NO
chr11	93967947	93969940	CiCo_mm9_circ_001193	321	+	ENSMUSG00000020859	Spag9	+	2	.	NO
chr11	94165155	94171005	CiCo_mm9_circ_001195	252	-	ENSMUSG00000020863	Luc7l3	-	3	.	NO
chr11	95164446	95167510	CiCo_mm9_circ_001196	325	-	ENSMUSG00000038909	Myst2	-	2	.	NO
chr11	95913047	95917264	CiCo_mm9_circ_001199	204	-	ENSMUSG00000014349	Ube2z	-	2	.	NO
chr11	97084264	97088182	CiCo_mm9_circ_001201	495	-	ENSMUSG00000001441	Npepps	-	3	.	NO
chr11	97084264	97099572	CiCo_mm9_circ_001202	1000	-	ENSMUSG00000001441	Npepps	-	8	mm9_circ_012588	50
chr11	97091143	97099572	CiCo_mm9_circ_001203	505	-	ENSMUSG00000001441	Npepps	-	5	mm9_circ_012588	100
chr11	97109515	97128993	CiCo_mm9_circ_001204	285	-	ENSMUSG00000001441	Npepps	-	3	.	NO
chr11	97588018	97594069	CiCo_mm9_circ_001205	348	-	ENSMUSG00000018547	Pip4k2b	-	3	.	NO
chr11	98091426	98104886	CiCo_mm9_circ_001206	698	+	ENSMUSG00000003119	Cdk12	+	6	.	NO
chr11	98124783	98129172	CiCo_mm9_circ_001207	322	+	ENSMUSG00000003119	Cdk12	+	3	mm9_circ_006636	100
chr11	98233383	98233656	CiCo_mm9_circ_001208	273	+	ENSMUSG00000018167	Stard3	+	1	.	NO
chr11	98682744	98684713	CiCo_mm9_circ_001210	1162	+	ENSMUSG00000078676	Casc3	+	4	.	NO
chr11	98771500	98772091	CiCo_mm9_circ_001212	485	+	ENSMUSG00000017499	Cdc6	+	2	.	NO
chr11	98856557	98857287	CiCo_mm9_circ_001213	303	-	ENSMUSG00000020914	Top2a	-	3	.	NO
chr11	98858042	98859233	CiCo_mm9_circ_001214	238	-	ENSMUSG00000020914	Top2a	-	2	.	NO
chr11	98858042	98862755	CiCo_mm9_circ_001215	759	-	ENSMUSG00000020914	Top2a	-	6	.	NO
chr11	98871341	98871913	CiCo_mm9_circ_001216	237	-	ENSMUSG00000020914	Top2a	-	2	.	NO
chr12	100030233	100032829	CiCo_mm9_circ_001217	629	-	ENSMUSG00000051166	Eml5	-	4	.	NO
chr12	100626570	100627127	CiCo_mm9_circ_001219	557	-	ENSMUSG00000033713	Foxn3	-	1	.	NO
chr12	101092819	101093849	CiCo_mm9_circ_001220	193	-	ENSMUSG00000021176	2610021K21Rik	-	2	.	NO
chr12	101653344	101657780	CiCo_mm9_circ_001223	252	-	ENSMUSG00000033530	Ttc7b	-	2	mm9_circ_016636	<50
chr12	101685069	101704520	CiCo_mm9_circ_001224	253	-	ENSMUSG00000033530	Ttc7b	-	2	mm9_circ_016636	<50
chr12	101834024	101857851	CiCo_mm9_circ_001225	412	-	ENSMUSG00000021180	Rps6ka5	-	4	.	NO
chr12	101854206	101857851	CiCo_mm9_circ_001226	224	-	ENSMUSG00000021180	Rps6ka5	-	2	.	NO
chr12	103100802	103117139	CiCo_mm9_circ_001227	703	-	ENSMUSG00000021188	Trip11	-	5	.	NO
chr12	103171177	103180414	CiCo_mm9_circ_001228	485	-	ENSMUSG00000093596	Atxn3	-	4	.	NO
chr12	103171177	103186649	CiCo_mm9_circ_001229	848	-	ENSMUSG00000093596	Atxn3	-	8	.	NO
chr12	103180326	103186649	CiCo_mm9_circ_001230	451	-	ENSMUSG00000093596	Atxn3	-	5	.	NO
chr12	103183609	103186649	CiCo_mm9_circ_001231	363	-	ENSMUSG00000093596	Atxn3	-	4	.	NO
chr12	103636392	103642555	CiCo_mm9_circ_001232	702	-	ENSMUSG00000021190	Lgmn	-	7	.	NO
chr12	103999580	104000191	CiCo_mm9_circ_001233	195	+	ENSMUSG00000041712	Ubr7	+	2	.	NO
chr12	103999580	104008153	CiCo_mm9_circ_001234	973	+	ENSMUSG00000041712	Ubr7	+	8	.	NO
chr12	104006279	104009490	CiCo_mm9_circ_001235	584	+	ENSMUSG00000041712	Ubr7	+	4	.	NO
chr12	104033382	104046270	CiCo_mm9_circ_001236	305	-	ENSMUSG00000041702	Btbd7	-	2	.	NO
chr12	104046109	104051053	CiCo_mm9_circ_001238	446	-	ENSMUSG00000041702	Btbd7	-	3	.	NO
chr12	104229559	104249502	CiCo_mm9_circ_001240	690	+	ENSMUSG00000021198	Unc79	+	4	mm9_circ_003783	50
chr12	104229559	104260086	CiCo_mm9_circ_001241	876	+	ENSMUSG00000021198	Unc79	+	6	mm9_circ_003783	100
chr12	106886522	106889733	CiCo_mm9_circ_001243	625	-	ENSMUSG00000041341	Atg2b	-	4	.	NO
chr12	107037860	107045428	CiCo_mm9_circ_001245	487	+	ENSMUSG00000021111	Papola	+	5	.	NO
chr12	107037860	107058660	CiCo_mm9_circ_001246	1391	+	ENSMUSG00000021111	Papola	+	14	.	NO
chr12	107274749	107281102	CiCo_mm9_circ_001247	221	+	ENSMUSG00000021115	Vrk1	+	2	mm9_circ_003984	100
chr12	107274749	107289214	CiCo_mm9_circ_001248	291	+	ENSMUSG00000021115	Vrk1	+	3	mm9_circ_003984	<50
chr12	107274749	107301018	CiCo_mm9_circ_001249	1073	+	ENSMUSG00000021115	Vrk1	+	10	mm9_circ_003984	<50
chr12	107274749	107308825	CiCo_mm9_circ_001250	1164	+	ENSMUSG00000021115	Vrk1	+	11	mm9_circ_003984	<50
chr12	109203881	109204097	CiCo_mm9_circ_001253	216	-	ENSMUSG00000048251	Bcl11b	-	1	.	NO
chr12	109227674	109228040	CiCo_mm9_circ_001255	366	-	ENSMUSG00000048251	Bcl11b	-	1	mm9_circ_001140	100
chr12	109395963	109403382	CiCo_mm9_circ_001256	682	-	ENSMUSG00000056770	Setd3	-	5	.	NO
chr12	109701736	109710195	CiCo_mm9_circ_001257	316	+	ENSMUSG00000058070	Eml1	+	2	.	NO
chr12	109772863	109774532	CiCo_mm9_circ_001258	282	+	ENSMUSG00000058070	Eml1	+	3	.	NO
chr12	109886524	109891309	CiCo_mm9_circ_001260	347	+	ENSMUSG00000021262	Evl	+	2	.	NO
chr12	111889700	111890404	CiCo_mm9_circ_001265	415	+	ENSMUSG00000018707	Dync1h1	+	3	.	NO
chr12	112176400	112193032	CiCo_mm9_circ_001268	970	+	ENSMUSG00000021275	Tecpr2	+	6	.	NO
chr12	112319934	112338249	CiCo_mm9_circ_001269	418	+	ENSMUSG00000037896	Rcor1	+	4	.	NO
chr12	112331291	112342016	CiCo_mm9_circ_001270	608	+	ENSMUSG00000037896	Rcor1	+	5	.	NO
chr12	112335665	112338249	CiCo_mm9_circ_001271	281	+	ENSMUSG00000037896	Rcor1	+	2	.	NO
chr12	112458021	112481749	CiCo_mm9_circ_001273	695	+	ENSMUSG00000021277	Traf3	+	5	.	NO
chr12	112830787	112842775	CiCo_mm9_circ_001275	246	+	ENSMUSG00000007411	Mark3	+	2	mm9_circ_000427	100
chr12	112830787	112856594	CiCo_mm9_circ_001276	361	+	ENSMUSG00000007411	Mark3	+	4	mm9_circ_011801	100
chr12	11286410	11287208	CiCo_mm9_circ_001277	199	+	ENSMUSG00000020608	Smc6	+	2	mm9_circ_003136	100
chr12	113010529	113012794	CiCo_mm9_circ_001280	493	+	ENSMUSG00000021288	Klc1	+	2	.	NO
chr12	113014134	113016911	CiCo_mm9_circ_001281	489	+	ENSMUSG00000021288	Klc1	+	5	.	NO
chr12	113016230	113027670	CiCo_mm9_circ_001282	826	+	ENSMUSG00000021288	Klc1	+	8	.	NO
chr12	113893337	113895202	CiCo_mm9_circ_001283	406	-	ENSMUSG00000001729	Akt1	-	3	.	NO
chr12	114197393	114197532	CiCo_mm9_circ_001284	139	-	.	Intergenic	.	1	.	NO
chr12	114350356	114361445	CiCo_mm9_circ_001285	471	+	ENSMUSG00000021144	Mta1	+	5	.	NO
chr12	118486129	118487173	CiCo_mm9_circ_001287	287	+	ENSMUSG00000056553	Ptprn2	+	2	.	NO
chr12	12283148	12311128	CiCo_mm9_circ_001288	215	+	ENSMUSG00000020589	Fam49a	+	2	.	NO
chr12	13291988	13317110	CiCo_mm9_circ_001289	704	+	ENSMUSG00000020576	Nbas	+	6	mm9_circ_015179	100
chr12	13295476	13296786	CiCo_mm9_circ_001290	233	+	ENSMUSG00000020576	Nbas	+	2	mm9_circ_015179	<50
chr12	13367736	13369421	CiCo_mm9_circ_001291	360	+	ENSMUSG00000020576	Nbas	+	2	.	NO
chr12	13381501	13386575	CiCo_mm9_circ_001292	320	+	ENSMUSG00000020576	Nbas	+	3	.	NO
chr12	13476646	13490850	CiCo_mm9_circ_001293	927	+	ENSMUSG00000020576	Nbas	+	4	.	NO
chr12	13489191	13490850	CiCo_mm9_circ_001294	586	+	ENSMUSG00000020576	Nbas	+	2	.	NO
chr12	13541185	13573063	CiCo_mm9_circ_001295	604	+	ENSMUSG00000020576	Nbas	+	4	.	NO
chr12	13565417	13573063	CiCo_mm9_circ_001296	408	+	ENSMUSG00000020576	Nbas	+	3	.	NO
chr12	17411776	17413702	CiCo_mm9_circ_001298	269	+	ENSMUSG00000061458	Nol10	+	3	.	NO
chr12	21223835	21236817	CiCo_mm9_circ_001299	612	+	ENSMUSG00000052632	Asap2	+	6	.	NO
chr12	21230165	21236817	CiCo_mm9_circ_001300	438	+	ENSMUSG00000052632	Asap2	+	4	.	NO
chr12	21236683	21253234	CiCo_mm9_circ_001301	505	+	ENSMUSG00000052632	Asap2	+	4	.	NO
chr12	25563055	25567659	CiCo_mm9_circ_001304	224	+	ENSMUSG00000020646	Mboat2	+	2	mm9_circ_018655	100
chr12	25563055	25609159	CiCo_mm9_circ_001305	320	+	ENSMUSG00000020646	Mboat2	+	3	mm9_circ_013240	100
chr12	25563055	25619487	CiCo_mm9_circ_001306	280	+	ENSMUSG00000020646	Mboat2	+	3	mm9_circ_006045	100
chr12	25563055	25624213	CiCo_mm9_circ_001307	335	+	ENSMUSG00000020646	Mboat2	+	4	mm9_circ_013240,mm9_circ_006045	75
chr12	25679676	25682195	CiCo_mm9_circ_001308	297	+	ENSMUSG00000036333	Kidins220	+	2	.	NO
chr12	25687853	25690083	CiCo_mm9_circ_001309	511	+	ENSMUSG00000036333	Kidins220	+	3	mm9_circ_002726	100
chr12	27024170	27074440	CiCo_mm9_circ_001310	328	-	ENSMUSG00000020642	Rnf144a	-	2	.	NO
chr12	28020862	28021361	CiCo_mm9_circ_001311	499	-	.	Intergenic	.	1	.	NO
chr12	29336889	29340549	CiCo_mm9_circ_001312	378	+	ENSMUSG00000020630	R.seh1	+	3	.	NO
chr12	29544116	29549699	CiCo_mm9_circ_001313	470	+	ENSMUSG00000036613	Tssc1	+	3	.	NO
chr12	30496237	30496599	CiCo_mm9_circ_001317	362	+	ENSMUSG00000061911	Myt1l	+	1	.	NO
chr12	30511730	30571050	CiCo_mm9_circ_001318	2257	+	ENSMUSG00000061911	Myt1l	+	10	.	NO
chr12	30511730	30580179	CiCo_mm9_circ_001319	2563	+	ENSMUSG00000061911	Myt1l	+	12	.	NO
chr12	30517152	30540148	CiCo_mm9_circ_001320	1228	+	ENSMUSG00000061911	Myt1l	+	8	.	NO
chr12	30521214	30580179	CiCo_mm9_circ_001321	1462	+	ENSMUSG00000061911	Myt1l	+	10	.	NO
chr12	30570987	30580179	CiCo_mm9_circ_001322	369	+	ENSMUSG00000061911	Myt1l	+	3	.	NO
chr12	30658857	30660427	CiCo_mm9_circ_001323	144	+	ENSMUSG00000020674	Pxdn	+	2	.	NO
chr12	32301939	32311741	CiCo_mm9_circ_001325	393	-	ENSMUSG00000020650	Bcap29	-	3	.	NO
chr12	32475711	32487348	CiCo_mm9_circ_001326	357	+	ENSMUSG00000035933	Cog5	+	3	.	NO
chr12	33820830	33825981	CiCo_mm9_circ_001329	239	-	ENSMUSG00000052125	F730043M19Rik	-	2	.	NO
chr12	34010775	34030953	CiCo_mm9_circ_001330	557	+	ENSMUSG00000020564	Atxn7l1	+	3	.	NO
chr12	3442473	3457209	CiCo_mm9_circ_001331	343	+	ENSMUSG00000037486	Asxl2	+	4	mm9_circ_007078	100
chr12	3451661	3469593	CiCo_mm9_circ_001332	373	+	ENSMUSG00000037486	Asxl2	+	3	mm9_circ_003099	50
chr12	3451661	3474613	CiCo_mm9_circ_001333	497	+	ENSMUSG00000037486	Asxl2	+	4	mm9_circ_003099	50
chr12	35763571	35771656	CiCo_mm9_circ_001337	428	+	ENSMUSG00000020590	Snx13	+	4	.	NO
chr12	3617605	3644022	CiCo_mm9_circ_001338	347	+	ENSMUSG00000071454	Dtnb	+	3	mm9_circ_018538	75
chr12	3617605	3648389	CiCo_mm9_circ_001339	514	+	ENSMUSG00000071454	Dtnb	+	4	mm9_circ_018538	100
chr12	3632809	3648389	CiCo_mm9_circ_001340	428	+	ENSMUSG00000071454	Dtnb	+	3	mm9_circ_006216	100
chr12	3643916	3648389	CiCo_mm9_circ_001341	273	+	ENSMUSG00000071454	Dtnb	+	2	mm9_circ_003139,mm9_circ_018538,mm9_circ_006216,mm9_circ_001407	<50
chr12	3749469	3751907	CiCo_mm9_circ_001343	211	+	ENSMUSG00000071454	Dtnb	+	2	mm9_circ_016441	100
chr12	3835026	3873428	CiCo_mm9_circ_001344	798	+	ENSMUSG00000020661	Dnmt3a	+	5	.	NO
chr12	3849634	3873428	CiCo_mm9_circ_001345	564	+	ENSMUSG00000020661	Dnmt3a	+	4	.	NO
chr12	3899192	3899699	CiCo_mm9_circ_001347	193	+	ENSMUSG00000020661	Dnmt3a	+	2	.	NO
chr12	41352923	41376076	CiCo_mm9_circ_001349	539	+	ENSMUSG00000035954	Dock4	+	5	mm9_circ_003957	<50
chr12	41358108	41376076	CiCo_mm9_circ_001350	483	+	ENSMUSG00000035954	Dock4	+	4	mm9_circ_003957	<50
chr12	41362669	41376076	CiCo_mm9_circ_001351	386	+	ENSMUSG00000035954	Dock4	+	3	mm9_circ_003957	<50
chr12	4640282	4640368	CiCo_mm9_circ_001354	86	+	ENSMUSG00000020640	Itsn2	+	1	.	NO
chr12	4769132	4769213	CiCo_mm9_circ_001356	81	-	ENSMUSG00000050545	A830093I24Rik	-	1	.	NO
chr12	4946897	4968112	CiCo_mm9_circ_001358	1150	+	ENSMUSG00000052812	Atad2b	+	10	mm9_circ_015239,mm9_circ_010194	<50
chr12	4951711	4961463	CiCo_mm9_circ_001360	404	+	ENSMUSG00000052812	Atad2b	+	4	.	NO
chr12	4968023	5013597	CiCo_mm9_circ_001362	1033	+	ENSMUSG00000052812	Atad2b	+	8	mm9_circ_015239	100
chr12	5024788	5031510	CiCo_mm9_circ_001364	283	+	ENSMUSG00000052812	Atad2b	+	2	.	NO
chr12	5144228	5147514	CiCo_mm9_circ_001365	655	-	ENSMUSG00000020627	Klhl29	-	2	.	NO
chr12	52485091	52494897	CiCo_mm9_circ_001367	552	+	ENSMUSG00000020952	Scfd1	+	6	.	NO
chr12	52490268	52494897	CiCo_mm9_circ_001368	392	+	ENSMUSG00000020952	Scfd1	+	4	.	NO
chr12	52711346	52762700	CiCo_mm9_circ_001369	1939	-	ENSMUSG00000020954	Strn3	-	16	mm9_circ_006696,mm9_circ_011824	75
chr12	52720800	52730494	CiCo_mm9_circ_001370	897	-	ENSMUSG00000020954	Strn3	-	7	mm9_circ_006696,mm9_circ_011824	<50
chr12	52722766	52762700	CiCo_mm9_circ_001371	1744	-	ENSMUSG00000020954	Strn3	-	14	mm9_circ_011824	100
chr12	52724162	52762700	CiCo_mm9_circ_001372	1603	-	ENSMUSG00000020954	Strn3	-	13	mm9_circ_006696,mm9_circ_011824	75
chr12	52728096	52762700	CiCo_mm9_circ_001373	1435	-	ENSMUSG00000020954	Strn3	-	12	mm9_circ_006696,mm9_circ_011824	75
chr12	52744090	52762700	CiCo_mm9_circ_001374	814	-	ENSMUSG00000020954	Strn3	-	7	mm9_circ_016984	50
chr12	52748980	52762700	CiCo_mm9_circ_001375	703	-	ENSMUSG00000020954	Strn3	-	6	mm9_circ_016984	100
chr12	52756388	52762700	CiCo_mm9_circ_001376	260	-	ENSMUSG00000020954	Strn3	-	3	mm9_circ_004275	100
chr12	52860205	52862157	CiCo_mm9_circ_001377	380	-	ENSMUSG00000035247	Hectd1	-	2	mm9_circ_002888	100
chr12	52863410	52865141	CiCo_mm9_circ_001378	257	-	ENSMUSG00000035247	Hectd1	-	2	.	NO
chr12	52873260	52873692	CiCo_mm9_circ_001379	344	-	ENSMUSG00000035247	Hectd1	-	2	mm9_circ_008488	100
chr12	52873260	52877617	CiCo_mm9_circ_001380	943	-	ENSMUSG00000035247	Hectd1	-	5	mm9_circ_008488	<50
chr12	52903150	52928500	CiCo_mm9_circ_001381	1178	-	ENSMUSG00000035247	Hectd1	-	5	.	NO
chr12	53643475	53661086	CiCo_mm9_circ_001384	358	+	ENSMUSG00000035133	Arhgap5	+	3	.	NO
chr12	53643475	53663414	CiCo_mm9_circ_001385	464	+	ENSMUSG00000035133	Arhgap5	+	4	.	NO
chr12	53981625	53989050	CiCo_mm9_circ_001386	2007	+	ENSMUSG00000061603	Akap6	+	2	.	NO
chr12	54038121	54039493	CiCo_mm9_circ_001387	261	+	ENSMUSG00000061603	Akap6	+	2	mm9_circ_001149	100
chr12	54602020	54602265	CiCo_mm9_circ_001393	245	+	ENSMUSG00000021010	Npas3	+	1	.	NO
chr12	55852768	55855363	CiCo_mm9_circ_001394	333	-	ENSMUSG00000005656	Snx6	-	3	.	NO
chr12	55861385	55884500	CiCo_mm9_circ_001395	635	-	ENSMUSG00000005656	Snx6	-	6	.	NO
chr12	55884389	55885106	CiCo_mm9_circ_001396	216	-	ENSMUSG00000005656	Snx6	-	2	.	NO
chr12	56149873	56154394	CiCo_mm9_circ_001398	198	-	ENSMUSG00000062198	2700097O09Rik	-	2	.	NO
chr12	56158228	56160565	CiCo_mm9_circ_001399	233	-	ENSMUSG00000062198	2700097O09Rik	-	2	mm9_circ_014863	100
chr12	56508455	56515485	CiCo_mm9_circ_001400	607	+	ENSMUSG00000021024	Psma6	+	5	.	NO
chr12	56760034	56778252	CiCo_mm9_circ_001401	1214	-	ENSMUSG00000021027	Ralgapa1	-	4	mm9_circ_006896	100
chr12	56774439	56778252	CiCo_mm9_circ_001402	934	-	ENSMUSG00000021027	Ralgapa1	-	2	mm9_circ_006896	<50
chr12	56858912	56863724	CiCo_mm9_circ_001403	333	-	ENSMUSG00000021027	Ralgapa1	-	2	.	NO
chr12	56883768	56891356	CiCo_mm9_circ_001404	396	-	ENSMUSG00000021027	Ralgapa1	-	4	.	NO
chr12	56887156	56896031	CiCo_mm9_circ_001405	330	-	ENSMUSG00000021027	Ralgapa1	-	4	.	NO
chr12	58406997	58408451	CiCo_mm9_circ_001406	233	+	ENSMUSG00000047022	Mipol1	+	2	.	NO
chr12	58432982	58433446	CiCo_mm9_circ_001407	205	+	ENSMUSG00000047022	Mipol1	+	2	mm9_circ_017659	100
chr12	58432982	58433446	CiCo_mm9_circ_001408	205	+	ENSMUSG00000047022	Mipol1	+	2	mm9_circ_017659	<50
chr12	60237050	60238773	CiCo_mm9_circ_001409	243	+	ENSMUSG00000021000	Ctage5	+	3	.	NO
chr12	62770466	62770641	CiCo_mm9_circ_001410	175	+	ENSMUSG00000035653	Lrfn5	+	1	.	NO
chr12	66087379	66087477	CiCo_mm9_circ_001412	98	+	ENSMUSG00000035614	Fam179b	+	1	.	NO
chr12	66117467	66121387	CiCo_mm9_circ_001413	497	+	ENSMUSG00000035614	Fam179b	+	3	.	NO
chr12	66143447	66149267	CiCo_mm9_circ_001414	760	+	ENSMUSG00000035597	Prpf39	+	4	.	NO
chr12	66166723	66171039	CiCo_mm9_circ_001415	414	-	ENSMUSG00000020949	Fkbp3	-	4	.	NO
chr12	66249708	66259848	CiCo_mm9_circ_001416	1732	-	ENSMUSG00000047534	Mis18bp1	-	6	.	NO
chr12	70421359	70423337	CiCo_mm9_circ_001420	343	-	ENSMUSG00000020982	Nemf	-	3	mm9_circ_016657	100
chr12	70704462	70711813	CiCo_mm9_circ_001422	610	-	ENSMUSG00000034801	Sos2	-	4	.	NO
chr12	70741040	70751718	CiCo_mm9_circ_001423	504	-	ENSMUSG00000034801	Sos2	-	3	mm9_circ_000076	100
chr12	71121820	71126468	CiCo_mm9_circ_001424	300	-	ENSMUSG00000021068	Nin	-	2	.	NO
chr12	71179098	71203841	CiCo_mm9_circ_001425	456	-	ENSMUSG00000021068	Nin	-	3	.	NO
chr12	72084694	72084830	CiCo_mm9_circ_001427	136	+	.	Intergenic	.	1	.	NO
chr12	72161048	72164311	CiCo_mm9_circ_001429	498	+	ENSMUSG00000048118	Arid4a	+	4	.	NO
chr12	72268052	72274226	CiCo_mm9_circ_001430	494	+	ENSMUSG00000034601	2700049A03Rik	+	3	.	NO
chr12	72285409	72295453	CiCo_mm9_circ_001431	974	+	ENSMUSG00000034601	2700049A03Rik	+	6	.	NO
chr12	75027543	75033463	CiCo_mm9_circ_001434	738	+	ENSMUSG00000021109	Hif1a	+	5	.	NO
chr12	75033260	75037283	CiCo_mm9_circ_001435	310	+	ENSMUSG00000021109	Hif1a	+	2	.	NO
chr12	75037176	75038787	CiCo_mm9_circ_001437	255	+	ENSMUSG00000021109	Hif1a	+	2	.	NO
chr12	75041334	75041618	CiCo_mm9_circ_001438	284	+	ENSMUSG00000021109	Hif1a	+	1	.	NO
chr12	75230358	75230538	CiCo_mm9_circ_001439	180	+	ENSMUSG00000044912	Syt16	+	1	mm9_circ_000396	<50
chr12	76220907	76232013	CiCo_mm9_circ_001441	245	-	ENSMUSG00000034402	Kcnh5	-	2	.	NO
chr12	76616588	76616785	CiCo_mm9_circ_001442	197	-	ENSMUSG00000021051	Ppp2r5e	-	1	.	NO
chr12	77016175	77020126	CiCo_mm9_circ_001444	507	+	ENSMUSG00000063450	Syne2	+	3	.	NO
chr12	77109117	77109928	CiCo_mm9_circ_001445	231	+	ENSMUSG00000063450	Syne2	+	2	mm9_circ_016694	100
chr12	77132262	77140072	CiCo_mm9_circ_001447	821	+	ENSMUSG00000063450	Syne2	+	5	.	NO
chr12	77173114	77188900	CiCo_mm9_circ_001448	645	+	ENSMUSG00000063450	Syne2	+	4	.	NO
chr12	77198870	77202118	CiCo_mm9_circ_001449	618	+	ENSMUSG00000063450	Syne2	+	3	.	NO
chr12	77389867	77392104	CiCo_mm9_circ_001450	537	+	ENSMUSG00000021048	Mthfd1	+	4	.	NO
chr12	77401374	77402385	CiCo_mm9_circ_001451	218	+	ENSMUSG00000021048	Mthfd1	+	2	.	NO
chr12	78015606	78015718	CiCo_mm9_circ_001454	112	+	ENSMUSG00000033373	Fntb	+	1	.	NO
chr12	79895231	79895320	CiCo_mm9_circ_001457	89	+	ENSMUSG00000021112	Mpp5	+	1	.	NO
chr12	79920190	79925859	CiCo_mm9_circ_001458	424	+	ENSMUSG00000021112	Mpp5	+	3	.	NO
chr12	80289467	80290094	CiCo_mm9_circ_001459	275	-	ENSMUSG00000066441	Rdh11	-	2	.	NO
chr12	80352140	80352277	CiCo_mm9_circ_001460	137	-	ENSMUSG00000066440	Zfyve26	-	1	.	NO
chr12	80364759	80365420	CiCo_mm9_circ_001461	300	-	ENSMUSG00000066440	Zfyve26	-	2	.	NO
chr12	80415818	80428391	CiCo_mm9_circ_001462	441	+	ENSMUSG00000059060	Rad51l1	+	3	.	NO
chr12	81279288	81282495	CiCo_mm9_circ_001463	299	-	ENSMUSG00000015143	Actn1	-	2	.	NO
chr12	81464990	81477718	CiCo_mm9_circ_001465	281	-	ENSMUSG00000049106	Dcaf5	-	2	.	NO
chr12	81498639	81505685	CiCo_mm9_circ_001466	451	-	ENSMUSG00000049106	Dcaf5	-	4	.	NO
chr12	82575573	82611952	CiCo_mm9_circ_001469	368	-	ENSMUSG00000021139	Gm20498	-	4	.	NO
chr12	83088879	83094219	CiCo_mm9_circ_001471	863	+	ENSMUSG00000021140	Pcnx	+	4	.	NO
chr12	83441648	83443486	CiCo_mm9_circ_001474	1838	+	ENSMUSG00000042700	Sipa1l1	+	1	mm9_circ_007155	100
chr12	83458219	83464118	CiCo_mm9_circ_001475	320	+	ENSMUSG00000042700	Sipa1l1	+	2	.	NO
chr12	83458219	83473529	CiCo_mm9_circ_001476	495	+	ENSMUSG00000042700	Sipa1l1	+	3	.	NO
chr12	83458219	83504166	CiCo_mm9_circ_001477	1876	+	ENSMUSG00000042700	Sipa1l1	+	8	.	NO
chr12	84874816	84876929	CiCo_mm9_circ_001478	274	+	ENSMUSG00000021222	Dcaf4	+	3	.	NO
chr12	84915581	84916086	CiCo_mm9_circ_001479	505	-	ENSMUSG00000042628	Zfyve1	-	1	.	NO
chr12	85040304	85040601	CiCo_mm9_circ_001480	207	+	ENSMUSG00000019969	Psen1	+	2	.	NO
chr12	85040304	85055855	CiCo_mm9_circ_001481	600	+	ENSMUSG00000019969	Psen1	+	4	.	NO
chr12	85053253	85055855	CiCo_mm9_circ_001482	393	+	ENSMUSG00000019969	Psen1	+	2	.	NO
chr12	85172871	85183308	CiCo_mm9_circ_001483	216	-	ENSMUSG00000021224	Numb	-	2	.	NO
chr12	85183167	85217762	CiCo_mm9_circ_001484	371	-	ENSMUSG00000021224	Numb	-	3	.	NO
chr12	85465424	85472337	CiCo_mm9_circ_001485	222	+	ENSMUSG00000042523	D.lc1	+	3	.	NO
chr12	85512409	85515373	CiCo_mm9_circ_001487	1970	-	ENSMUSG00000042507	C130039O16Rik	-	2	.	NO
chr12	85662761	85663969	CiCo_mm9_circ_001488	316	+	ENSMUSG00000042472	Zfp410	+	2	.	NO
chr12	85949519	85950423	CiCo_mm9_circ_001489	399	-	ENSMUSG00000021240	Abcd4	-	4	.	NO
chr12	86275101	86292331	CiCo_mm9_circ_001490	1454	-	ENSMUSG00000042350	1110018G07Rik	-	7	.	NO
chr12	86353838	86356543	CiCo_mm9_circ_001491	1400	+	ENSMUSG00000021244	Ylpm1	+	3	.	NO
chr12	86369719	86374984	CiCo_mm9_circ_001492	2236	+	ENSMUSG00000021244	Ylpm1	+	2	mm9_circ_015402	100
chr12	86390641	86391322	CiCo_mm9_circ_001493	345	+	ENSMUSG00000021244	Ylpm1	+	3	mm9_circ_017717	100
chr12	86459308	86463089	CiCo_mm9_circ_001494	452	+	ENSMUSG00000004789	Dlst	+	5	.	NO
chr12	86462936	86464821	CiCo_mm9_circ_001495	328	+	ENSMUSG00000004789	Dlst	+	3	.	NO
chr12	86648879	86651498	CiCo_mm9_circ_001496	393	-	ENSMUSG00000034290	Nek9	-	3	.	NO
chr12	86675547	86677435	CiCo_mm9_circ_001497	234	-	ENSMUSG00000034290	Nek9	-	2	.	NO
chr12	8704896	8705994	CiCo_mm9_circ_001498	194	+	ENSMUSG00000020594	Pum2	+	2	mm9_circ_012414	<50
chr12	8704896	8712847	CiCo_mm9_circ_001499	178	+	ENSMUSG00000020594	Pum2	+	2	mm9_circ_012414	100
chr12	87258624	87273758	CiCo_mm9_circ_001500	742	+	ENSMUSG00000012609	Ttll5	+	6	.	NO
chr12	8750566	8755759	CiCo_mm9_circ_001501	1106	+	ENSMUSG00000020594	Pum2	+	7	.	NO
chr12	87601526	87610011	CiCo_mm9_circ_001502	451	+	ENSMUSG00000021254	1700020O03Rik	+	5	mm9_circ_004188	100
chr12	88687657	88691335	CiCo_mm9_circ_001504	219	-	ENSMUSG00000021036	Sptlc2	-	2	.	NO
chr12	88781255	88782730	CiCo_mm9_circ_001505	247	-	ENSMUSG00000079036	Alkbh1	-	2	.	NO
chr12	9029524	9031140	CiCo_mm9_circ_001507	306	+	ENSMUSG00000066643	Wdr35	+	2	.	NO
chr12	90425465	90431651	CiCo_mm9_circ_001508	464	+	ENSMUSG00000066392	Nrxn3	+	2	.	NO
chr12	90741461	90751556	CiCo_mm9_circ_001509	485	+	ENSMUSG00000066392	Nrxn3	+	3	mm9_circ_000560	100
chr12	92494014	92494179	CiCo_mm9_circ_001513	165	-	ENSMUSG00000061533	4930534B04Rik	-	1	.	NO
chr12	92527928	92537517	CiCo_mm9_circ_001515	447	-	ENSMUSG00000061533	4930534B04Rik	-	4	.	NO
chr12	92527928	92604944	CiCo_mm9_circ_001516	1221	-	ENSMUSG00000061533	4930534B04Rik	-	11	.	NO
chr12	92563954	92587316	CiCo_mm9_circ_001517	525	-	ENSMUSG00000061533	4930534B04Rik	-	5	.	NO
chr12	92585965	92587316	CiCo_mm9_circ_001518	243	-	ENSMUSG00000061533	4930534B04Rik	-	2	.	NO
chr12	99452542	99472607	CiCo_mm9_circ_001519	737	-	ENSMUSG00000021003	Galc	-	6	.	NO
chr12	99465377	99472607	CiCo_mm9_circ_001520	409	-	ENSMUSG00000021003	Galc	-	3	.	NO
chr12	99728114	99734520	CiCo_mm9_circ_001521	279	-	ENSMUSG00000033854	Kcnk10	-	2	mm9_circ_001166	<50
chr12	99728114	99757042	CiCo_mm9_circ_001522	614	-	ENSMUSG00000033854	Kcnk10	-	3	mm9_circ_001166	100
chr12	99734402	99757042	CiCo_mm9_circ_001524	453	-	ENSMUSG00000033854	Kcnk10	-	2	mm9_circ_001166	75
chr12	99897759	99902515	CiCo_mm9_circ_001526	315	+	ENSMUSG00000021007	Spata7	+	4	.	NO
chr12	99920728	99921825	CiCo_mm9_circ_001527	360	-	ENSMUSG00000021009	Ptpn21	-	2	.	NO
chr12	99921687	99921825	CiCo_mm9_circ_001528	138	-	ENSMUSG00000021009	Ptpn21	-	1	.	NO
chr12	99990987	100002188	CiCo_mm9_circ_001529	1200	+	ENSMUSG00000021012	Zc3h14	+	7	.	NO
chr12	99995218	99998089	CiCo_mm9_circ_001530	787	+	ENSMUSG00000021012	Zc3h14	+	3	.	NO
chr13	100896541	100898316	CiCo_mm9_circ_001531	540	+	ENSMUSG00000021645	Smn1	+	4	.	NO
chr13	101474345	101474493	CiCo_mm9_circ_001532	148	-	ENSMUSG00000069089	Cdk7	-	1	.	NO
chr13	101486455	101487637	CiCo_mm9_circ_001533	230	-	ENSMUSG00000069089	Cdk7	-	2	.	NO
chr13	101531715	101533556	CiCo_mm9_circ_001534	216	-	ENSMUSG00000045273	Cenph	-	2	.	NO
chr13	104634893	104635705	CiCo_mm9_circ_001536	296	-	ENSMUSG00000021709	Erbb2ip	-	2	.	NO
chr13	104674222	104679365	CiCo_mm9_circ_001537	364	-	ENSMUSG00000021709	Erbb2ip	-	3	mm9_circ_013774	100
chr13	104842583	104842719	CiCo_mm9_circ_001540	136	-	ENSMUSG00000021710	Nln	-	1	mm9_circ_018245	100
chr13	104974805	104978323	CiCo_mm9_circ_001541	584	+	ENSMUSG00000021712	Trim23	+	3	.	NO
chr13	105510501	105587423	CiCo_mm9_circ_001543	364	-	ENSMUSG00000021715	Cwc27	-	4	.	NO
chr13	105582578	105587423	CiCo_mm9_circ_001544	266	-	ENSMUSG00000021715	Cwc27	-	3	.	NO
chr13	107602287	107632290	CiCo_mm9_circ_001546	303	-	ENSMUSG00000042590	Ipo11	-	3	.	NO
chr13	107613035	107638416	CiCo_mm9_circ_001547	428	-	ENSMUSG00000042590	Ipo11	-	4	.	NO
chr13	107632168	107637539	CiCo_mm9_circ_001548	236	-	ENSMUSG00000042590	Ipo11	-	2	.	NO
chr13	107637425	107676837	CiCo_mm9_circ_001549	1242	-	ENSMUSG00000042590	Ipo11	-	14	.	NO
chr13	107700279	107700896	CiCo_mm9_circ_001550	277	-	ENSMUSG00000042590	Ipo11	-	2	mm9_circ_018127	<50
chr13	107700279	107715236	CiCo_mm9_circ_001551	522	-	ENSMUSG00000042590	Ipo11	-	4	mm9_circ_018127	100
chr13	107783242	107784022	CiCo_mm9_circ_001552	212	-	ENSMUSG00000021693	Kif2a	-	2	.	NO
chr13	108528451	108538443	CiCo_mm9_circ_001553	912	-	ENSMUSG00000032846	Zswim6	-	5	mm9_circ_010567	100
chr13	109147587	109153857	CiCo_mm9_circ_001554	395	+	ENSMUSG00000021697	Depdc1b	+	3	.	NO
chr13	109147587	109159054	CiCo_mm9_circ_001555	443	+	ENSMUSG00000021697	Depdc1b	+	4	.	NO
chr13	120155133	120158952	CiCo_mm9_circ_001558	575	-	ENSMUSG00000025453	Nnt	-	3	.	NO
chr13	120183417	120183635	CiCo_mm9_circ_001559	218	-	ENSMUSG00000025453	Nnt	-	1	mm9_circ_003736	<50
chr13	120218966	120229678	CiCo_mm9_circ_001560	469	+	ENSMUSG00000025451	Paip1	+	3	mm9_circ_005566	100
chr13	120218966	120236647	CiCo_mm9_circ_001561	707	+	ENSMUSG00000025451	Paip1	+	5	mm9_circ_005566	50
chr13	120260945	120269837	CiCo_mm9_circ_001562	750	+	ENSMUSG00000062822	4833420G17Rik	+	7	.	NO
chr13	12297009	12342958	CiCo_mm9_circ_001563	2168	-	ENSMUSG00000021311	Mtr	-	21	.	NO
chr13	14090629	14093445	CiCo_mm9_circ_001564	221	-	ENSMUSG00000039233	Tbce	-	3	.	NO
chr13	14273486	14280298	CiCo_mm9_circ_001565	1499	+	ENSMUSG00000039219	Arid4b	+	3	.	NO
chr13	14273486	14287743	CiCo_mm9_circ_001566	1976	+	ENSMUSG00000039219	Arid4b	+	6	.	NO
chr13	14377814	14392714	CiCo_mm9_circ_001567	443	-	ENSMUSG00000021301	Hecw1	-	3	.	NO
chr13	14377814	14404057	CiCo_mm9_circ_001568	839	-	ENSMUSG00000021301	Hecw1	-	6	.	NO
chr13	15569832	15640475	CiCo_mm9_circ_001569	408	+	ENSMUSG00000021318	Gli3	+	2	.	NO
chr13	15732901	15740555	CiCo_mm9_circ_001570	555	+	ENSMUSG00000021318	Gli3	+	3	.	NO
chr13	15732901	15754363	CiCo_mm9_circ_001571	1024	+	ENSMUSG00000021318	Gli3	+	6	.	NO
chr13	15736126	15754363	CiCo_mm9_circ_001572	818	+	ENSMUSG00000021318	Gli3	+	5	.	NO
chr13	17854937	17864791	CiCo_mm9_circ_001573	1139	-	ENSMUSG00000041297	Cdk13	-	4	mm9_circ_016768	100
chr13	17864134	17864791	CiCo_mm9_circ_001574	657	-	ENSMUSG00000041297	Cdk13	-	1	mm9_circ_008656,mm9_circ_005864,mm9_circ_016768	<50
chr13	18902300	18906162	CiCo_mm9_circ_001575	334	+	ENSMUSG00000041236	Vps41	+	3	mm9_circ_008691	100
chr13	24901754	24904947	CiCo_mm9_circ_001581	3193	+	ENSMUSG00000019132	BC005537	+	1	.	NO
chr13	24927884	24932427	CiCo_mm9_circ_001582	553	+	ENSMUSG00000035958	Tdp2	+	4	.	NO
chr13	24930015	24932427	CiCo_mm9_circ_001583	290	+	ENSMUSG00000035958	Tdp2	+	2	.	NO
chr13	28597574	28597782	CiCo_mm9_circ_001585	208	-	ENSMUSG00000085936	2610307P16Rik	-	1	.	NO
chr13	28700386	28760573	CiCo_mm9_circ_001589	446	-	ENSMUSG00000085936	2610307P16Rik	-	2	mm9_circ_007005	<50
chr13	28760238	28760573	CiCo_mm9_circ_001591	335	-	ENSMUSG00000085936	2610307P16Rik	-	1	mm9_circ_007005	<50
chr13	28760238	28761863	CiCo_mm9_circ_001592	548	-	ENSMUSG00000085936	2610307P16Rik	-	2	mm9_circ_007005	100
chr13	28760238	28803077	CiCo_mm9_circ_001593	427	-	ENSMUSG00000085936	2610307P16Rik	-	2	mm9_circ_007005	<50
chr13	29938096	29941977	CiCo_mm9_circ_001596	283	-	ENSMUSG00000006191	Cdkal1	-	2	.	NO
chr13	29941807	29946810	CiCo_mm9_circ_001597	214	-	ENSMUSG00000006191	Cdkal1	-	2	.	NO
chr13	30010444	30012094	CiCo_mm9_circ_001598	332	-	ENSMUSG00000016477	E2f3	-	2	.	NO
chr13	31017591	31032639	CiCo_mm9_circ_001599	704	-	ENSMUSG00000021357	Exoc2	-	5	.	NO
chr13	34390865	34397130	CiCo_mm9_circ_001600	259	-	ENSMUSG00000038267	Slc22a23	-	2	.	NO
chr13	3550234	3556303	CiCo_mm9_circ_001601	566	+	ENSMUSG00000021218	Gdi2	+	4	.	NO
chr13	3555559	3556303	CiCo_mm9_circ_001602	331	+	ENSMUSG00000021218	Gdi2	+	2	.	NO
chr13	35907777	35908444	CiCo_mm9_circ_001603	667	+	ENSMUSG00000059288	Cdyl	+	1	mm9_circ_003780	100
chr13	36323990	36338363	CiCo_mm9_circ_001607	292	+	ENSMUSG00000021420	Fars2	+	2	mm9_circ_012541	100
chr13	37984420	37991656	CiCo_mm9_circ_001608	361	+	ENSMUSG00000039087	Rreb1	+	3	mm9_circ_011756	100
chr13	41103579	41104733	CiCo_mm9_circ_001610	274	+	ENSMUSG00000038683	Pak1ip1	+	3	.	NO
chr13	42150768	42150911	CiCo_mm9_circ_001611	143	+	ENSMUSG00000021366	Hivep1	+	1	mm9_circ_018331	100
chr13	42150768	42218582	CiCo_mm9_circ_001612	197	+	ENSMUSG00000021366	Hivep1	+	2	mm9_circ_017320	100
chr13	43190117	43192175	CiCo_mm9_circ_001613	405	+	ENSMUSG00000054728	Phactr1	+	2	.	NO
chr13	43507779	43520583	CiCo_mm9_circ_001614	1017	-	ENSMUSG00000038546	Ranbp9	-	7	mm9_circ_001791	<50
chr13	43520398	43530350	CiCo_mm9_circ_001615	376	-	ENSMUSG00000038546	Ranbp9	-	3	mm9_circ_003062,mm9_circ_001791	<50
chr13	43530182	43531511	CiCo_mm9_circ_001616	221	-	ENSMUSG00000038546	Ranbp9	-	2	mm9_circ_003062	<50
chr13	44918748	44943790	CiCo_mm9_circ_001617	278	+	ENSMUSG00000038518	Jarid2	+	2	.	NO
chr13	44943648	44980249	CiCo_mm9_circ_001619	489	+	ENSMUSG00000038518	Jarid2	+	3	.	NO
chr13	45048540	45065547	CiCo_mm9_circ_001620	156	-	ENSMUSG00000057531	Dtnbp1	-	2	.	NO
chr13	48927372	48930664	CiCo_mm9_circ_001623	201	-	ENSMUSG00000038025	Phf2	-	2	mm9_circ_017445	100
chr13	48980641	48981247	CiCo_mm9_circ_001624	239	-	ENSMUSG00000038014	Fam120a	-	2	.	NO
chr13	49017050	49029447	CiCo_mm9_circ_001625	608	-	ENSMUSG00000038014	Fam120a	-	4	mm9_circ_017352	<50
chr13	49027665	49029447	CiCo_mm9_circ_001626	226	-	ENSMUSG00000038014	Fam120a	-	2	mm9_circ_017352	100
chr13	49027665	49044672	CiCo_mm9_circ_001627	556	-	ENSMUSG00000038014	Fam120a	-	4	mm9_circ_017352	<50
chr13	49799639	49801254	CiCo_mm9_circ_001629	314	+	ENSMUSG00000037851	Iars	+	3	.	NO
chr13	49803774	49805142	CiCo_mm9_circ_001630	269	+	ENSMUSG00000037851	Iars	+	2	.	NO
chr13	51218456	51218657	CiCo_mm9_circ_001632	201	+	ENSMUSG00000021395	Spin1	+	1	.	NO
chr13	51752249	51752479	CiCo_mm9_circ_001633	230	+	ENSMUSG00000035139	Secisbp2	+	1	.	NO
chr13	51752249	51769398	CiCo_mm9_circ_001634	664	+	ENSMUSG00000035139	Secisbp2	+	5	.	NO
chr13	51766175	51772648	CiCo_mm9_circ_001635	661	+	ENSMUSG00000035139	Secisbp2	+	5	.	NO
chr13	55136249	55141984	CiCo_mm9_circ_001636	257	-	ENSMUSG00000025878	Uimc1	-	2	.	NO
chr13	55157335	55171168	CiCo_mm9_circ_001637	267	-	ENSMUSG00000025878	Uimc1	-	3	mm9_circ_013780	100
chr13	55178763	55194642	CiCo_mm9_circ_001638	365	-	ENSMUSG00000025878	Uimc1	-	3	.	NO
chr13	55186970	55194642	CiCo_mm9_circ_001639	240	-	ENSMUSG00000025878	Uimc1	-	2	.	NO
chr13	55314564	55340223	CiCo_mm9_circ_001640	513	+	ENSMUSG00000021488	Nsd1	+	4	mm9_circ_000476	<50
chr13	55335255	55340223	CiCo_mm9_circ_001641	309	+	ENSMUSG00000021488	Nsd1	+	2	mm9_circ_000476	<50
chr13	55335255	55349438	CiCo_mm9_circ_001642	2869	+	ENSMUSG00000021488	Nsd1	+	3	mm9_circ_000476	100
chr13	55361704	55363175	CiCo_mm9_circ_001643	396	+	ENSMUSG00000021488	Nsd1	+	2	.	NO
chr13	55377883	55384143	CiCo_mm9_circ_001644	387	+	ENSMUSG00000021488	Nsd1	+	3	mm9_circ_010230	<50
chr13	55392491	55397553	CiCo_mm9_circ_001645	543	+	ENSMUSG00000021488	Nsd1	+	3	.	NO
chr13	56184480	56197592	CiCo_mm9_circ_001647	13112	-	ENSMUSG00000015937	H2afy	-	1	.	NO
chr13	56824789	56829990	CiCo_mm9_circ_001649	940	+	ENSMUSG00000021540	Smad5	+	3	.	NO
chr13	58293082	58300431	CiCo_mm9_circ_001654	934	-	ENSMUSG00000005312	Ubqln1	-	5	.	NO
chr13	58960529	58962916	CiCo_mm9_circ_001655	576	+	ENSMUSG00000055254	Ntrk2	+	3	mm9_circ_006706	100
chr13	58975688	58979623	CiCo_mm9_circ_001656	198	+	ENSMUSG00000055254	Ntrk2	+	2	.	NO
chr13	59613684	59645812	CiCo_mm9_circ_001657	1120	-	ENSMUSG00000021557	Agtpbp1	-	10	mm9_circ_012190	50
chr13	59629747	59645812	CiCo_mm9_circ_001658	601	-	ENSMUSG00000021557	Agtpbp1	-	6	mm9_circ_012190	75
chr13	63162400	63169645	CiCo_mm9_circ_001660	403	+	ENSMUSG00000021458	2010111I01Rik	+	2	mm9_circ_008943	<50
chr13	63162394	63169645	CiCo_mm9_circ_001661	406	+	ENSMUSG00000021458	2010111I01Rik	+	2	mm9_circ_008943	100
chr13	63272300	63272407	CiCo_mm9_circ_001662	107	+	ENSMUSG00000021458	2010111I01Rik	+	1	.	NO
chr13	63272300	63341640	CiCo_mm9_circ_001663	182	+	ENSMUSG00000021458	2010111I01Rik	+	2	.	NO
chr13	64243515	64246988	CiCo_mm9_circ_001665	410	-	ENSMUSG00000044934	Zfp367	-	3	.	NO
chr13	65179661	65197022	CiCo_mm9_circ_001667	402	-	ENSMUSG00000038212	Hiatl1	-	4	.	NO
chr13	68711454	68716582	CiCo_mm9_circ_001668	241	-	ENSMUSG00000034617	Mtrr	-	2	.	NO
chr13	69643483	69654781	CiCo_mm9_circ_001669	870	-	ENSMUSG00000034575	Papd7	-	7	mm9_circ_006518	<50
chr13	69648440	69654781	CiCo_mm9_circ_001670	529	-	ENSMUSG00000034575	Papd7	-	5	mm9_circ_006518	<50
chr13	69649497	69654781	CiCo_mm9_circ_001671	400	-	ENSMUSG00000034575	Papd7	-	4	mm9_circ_006518	50
chr13	69651767	69654781	CiCo_mm9_circ_001672	292	-	ENSMUSG00000034575	Papd7	-	3	mm9_circ_006518	100
chr13	70731450	70740114	CiCo_mm9_circ_001673	727	-	ENSMUSG00000034525	BC018507	-	5	.	NO
chr13	74190328	74192439	CiCo_mm9_circ_001674	288	-	ENSMUSG00000021572	Cep72	-	2	.	NO
chr13	74317882	74337123	CiCo_mm9_circ_001675	1632	-	ENSMUSG00000034152	Exoc3	-	8	.	NO
chr13	74327517	74344545	CiCo_mm9_circ_001676	1211	-	ENSMUSG00000034152	Exoc3	-	4	.	NO
chr13	74471745	74480946	CiCo_mm9_circ_001677	745	-	ENSMUSG00000021577	Sdha	-	5	.	NO
chr13	76030353	76055295	CiCo_mm9_circ_001678	867	-	ENSMUSG00000021589	Rhobtb3	-	5	.	NO
chr13	76039625	76050902	CiCo_mm9_circ_001680	591	-	ENSMUSG00000021589	Rhobtb3	-	3	.	NO
chr13	76039625	76055295	CiCo_mm9_circ_001681	746	-	ENSMUSG00000021589	Rhobtb3	-	4	.	NO
chr13	76076899	76077086	CiCo_mm9_circ_001682	187	-	ENSMUSG00000021589	Rhobtb3	-	1	.	NO
chr13	77222701	77223721	CiCo_mm9_circ_001684	295	-	ENSMUSG00000021597	Ankrd32	-	2	.	NO
chr13	77222701	77231672	CiCo_mm9_circ_001685	672	-	ENSMUSG00000021597	Ankrd32	-	5	.	NO
chr13	77251832	77265975	CiCo_mm9_circ_001686	594	-	ENSMUSG00000021597	Ankrd32	-	4	.	NO
chr13	77455608	77473624	CiCo_mm9_circ_001688	633	+	ENSMUSG00000071252	2210408I21Rik	+	4	mm9_circ_006031	50
chr13	77471563	77473624	CiCo_mm9_circ_001689	251	+	ENSMUSG00000071252	2210408I21Rik	+	2	mm9_circ_006031	<50
chr13	78138846	78145733	CiCo_mm9_circ_001691	202	+	ENSMUSG00000064138	Fam172a	+	2	mm9_circ_014107	<50
chr13	81513180	81525960	CiCo_mm9_circ_001693	652	-	ENSMUSG00000069170	Gpr98	-	4	.	NO
chr13	81513180	81530799	CiCo_mm9_circ_001694	837	-	ENSMUSG00000069170	Gpr98	-	5	.	NO
chr13	81557994	81583577	CiCo_mm9_circ_001695	3217	-	ENSMUSG00000069170	Gpr98	-	11	.	NO
chr13	81633572	81635366	CiCo_mm9_circ_001696	301	-	ENSMUSG00000069170	Gpr98	-	2	.	NO
chr13	81678957	81683643	CiCo_mm9_circ_001697	561	-	ENSMUSG00000069170	Gpr98	-	3	.	NO
chr13	81683466	81696322	CiCo_mm9_circ_001698	551	-	ENSMUSG00000069170	Gpr98	-	2	.	NO
chr13	84390834	84399845	CiCo_mm9_circ_001700	286	+	ENSMUSG00000035762	Tmem161b	+	3	mm9_circ_007721	100
chr13	84411775	84426403	CiCo_mm9_circ_001701	625	+	ENSMUSG00000035762	Tmem161b	+	5	.	NO
chr13	8984454	8991281	CiCo_mm9_circ_001705	894	-	ENSMUSG00000021149	Gtpbp4	-	8	.	NO
chr13	89861171	89865268	CiCo_mm9_circ_001706	678	-	ENSMUSG00000021614	Vcan	-	3	.	NO
chr13	8988298	8992061	CiCo_mm9_circ_001707	606	-	ENSMUSG00000021149	Gtpbp4	-	5	.	NO
chr13	90140522	90140689	CiCo_mm9_circ_001708	167	-	ENSMUSG00000021615	Xrcc4	-	1	mm9_circ_008286	100
chr13	9121353	9136547	CiCo_mm9_circ_001710	474	+	ENSMUSG00000033499	Larp4b	+	4	.	NO
chr13	9136024	9150470	CiCo_mm9_circ_001711	990	+	ENSMUSG00000033499	Larp4b	+	8	.	NO
chr13	91664189	91704299	CiCo_mm9_circ_001712	220	+	ENSMUSG00000003992	Ssbp2	+	3	mm9_circ_009672	100
chr13	91940215	91940621	CiCo_mm9_circ_001714	244	-	ENSMUSG00000021621	Zcchc9	-	2	.	NO
chr13	92990910	93005686	CiCo_mm9_circ_001715	288	-	ENSMUSG00000014850	Msh3	-	2	.	NO
chr13	93005528	93070313	CiCo_mm9_circ_001716	1245	-	ENSMUSG00000014850	Msh3	-	10	mm9_circ_009822	<50
chr13	93019781	93026757	CiCo_mm9_circ_001717	220	-	ENSMUSG00000014850	Msh3	-	2	mm9_circ_009822	<50
chr13	93019781	93035946	CiCo_mm9_circ_001718	402	-	ENSMUSG00000014850	Msh3	-	4	mm9_circ_009822	100
chr13	93019781	93044872	CiCo_mm9_circ_001719	759	-	ENSMUSG00000014850	Msh3	-	6	mm9_circ_009822	50
chr13	93026649	93082641	CiCo_mm9_circ_001720	1203	-	ENSMUSG00000014850	Msh3	-	10	mm9_circ_009822	<50
chr13	93069107	93082641	CiCo_mm9_circ_001721	423	-	ENSMUSG00000014850	Msh3	-	4	.	NO
chr13	93116687	93121315	CiCo_mm9_circ_001722	554	-	ENSMUSG00000014850	Msh3	-	4	.	NO
chr13	94111710	94126034	CiCo_mm9_circ_001724	522	+	ENSMUSG00000007617	Homer1	+	4	mm9_circ_010239	100
chr13	94157478	94163063	CiCo_mm9_circ_001725	349	+	ENSMUSG00000007617	Homer1	+	3	.	NO
chr13	9492350	9505935	CiCo_mm9_circ_001726	183	+	ENSMUSG00000048264	Dip2c	+	2	.	NO
chr13	95173292	95174062	CiCo_mm9_circ_001728	257	+	ENSMUSG00000021686	Ap3b1	+	2	.	NO
chr13	95241630	95253315	CiCo_mm9_circ_001730	777	+	ENSMUSG00000021686	Ap3b1	+	5	.	NO
chr13	95765204	95780350	CiCo_mm9_circ_001731	530	+	ENSMUSG00000042015	Wdr41	+	6	.	NO
chr13	96516392	96533357	CiCo_mm9_circ_001732	312	-	ENSMUSG00000021676	Iqgap2	-	3	.	NO
chr13	9709391	9734712	CiCo_mm9_circ_001733	457	-	ENSMUSG00000021156	Zmynd11	-	3	mm9_circ_001794	50
chr13	9720018	9734712	CiCo_mm9_circ_001735	295	-	ENSMUSG00000021156	Zmynd11	-	2	mm9_circ_001794	100
chr13	97422612	97430179	CiCo_mm9_circ_001737	1598	-	ENSMUSG00000021670	Hmgcr	-	10	.	NO
chr13	97425504	97425967	CiCo_mm9_circ_001738	317	-	ENSMUSG00000021670	Hmgcr	-	2	.	NO
chr13	99037270	99042807	CiCo_mm9_circ_001741	597	+	ENSMUSG00000021661	Ankra2	+	6	.	NO
chr13	99504973	99515859	CiCo_mm9_circ_001743	346	-	ENSMUSG00000041685	Fcho2	-	3	.	NO
chr13	99515755	99534504	CiCo_mm9_circ_001744	650	-	ENSMUSG00000041685	Fcho2	-	10	.	NO
chr13	99525034	99534504	CiCo_mm9_circ_001745	377	-	ENSMUSG00000041685	Fcho2	-	5	.	NO
chr14	100421840	100422387	CiCo_mm9_circ_001746	547	-	ENSMUSG00000072294	Klf12	-	1	.	NO
chr14	101906304	101906907	CiCo_mm9_circ_001747	603	-	ENSMUSG00000033083	Tbc1d4	-	1	.	NO
chr14	103573982	103574207	CiCo_mm9_circ_001748	225	-	ENSMUSG00000033004	Mycbp2	-	1	.	NO
chr14	103607965	103610606	CiCo_mm9_circ_001749	311	-	ENSMUSG00000033004	Mycbp2	-	2	.	NO
chr14	103651625	103675735	CiCo_mm9_circ_001750	676	-	ENSMUSG00000033004	Mycbp2	-	6	.	NO
chr14	104902563	104909654	CiCo_mm9_circ_001751	566	-	ENSMUSG00000022120	Rnf219	-	4	.	NO
chr14	105540412	105552849	CiCo_mm9_circ_001752	1438	-	ENSMUSG00000022119	Rbm26	-	8	.	NO
chr14	105549469	105559830	CiCo_mm9_circ_001753	1346	-	ENSMUSG00000022119	Rbm26	-	8	.	NO
chr14	105686833	105697344	CiCo_mm9_circ_001754	516	+	ENSMUSG00000053253	Ndfip2	+	4	.	NO
chr14	117585883	117586042	CiCo_mm9_circ_001756	159	+	ENSMUSG00000058571	Gpc6	+	1	.	NO
chr14	121501210	121501404	CiCo_mm9_circ_001764	194	+	ENSMUSG00000025555	Farp1	+	1	.	NO
chr14	121736643	121736874	CiCo_mm9_circ_001765	231	-	ENSMUSG00000063410	Stk24	-	1	.	NO
chr14	122304344	122307542	CiCo_mm9_circ_001766	358	+	ENSMUSG00000041765	Ubac2	+	3	mm9_circ_010355	100
chr14	122532501	122542737	CiCo_mm9_circ_001767	684	+	ENSMUSG00000025544	Tm9sf2	+	6	.	NO
chr14	123015975	123037639	CiCo_mm9_circ_001769	169	+	ENSMUSG00000041650	Pcca	+	2	.	NO
chr14	123057899	123137226	CiCo_mm9_circ_001770	1030	+	ENSMUSG00000041650	Pcca	+	10	.	NO
chr14	123340526	123372507	CiCo_mm9_circ_001771	1125	-	ENSMUSG00000041594	Tmtc4	-	8	mm9_circ_009542	<50
chr14	123349710	123372507	CiCo_mm9_circ_001772	525	-	ENSMUSG00000041594	Tmtc4	-	4	mm9_circ_009542	<50
chr14	123349710	123377508	CiCo_mm9_circ_001773	738	-	ENSMUSG00000041594	Tmtc4	-	5	mm9_circ_009542	<50
chr14	123370961	123372507	CiCo_mm9_circ_001774	333	-	ENSMUSG00000041594	Tmtc4	-	2	mm9_circ_009542	<50
chr14	13244067	13286833	CiCo_mm9_circ_001776	604	-	ENSMUSG00000054423	Cadps	-	6	.	NO
chr14	13272384	13286833	CiCo_mm9_circ_001777	463	-	ENSMUSG00000054423	Cadps	-	4	.	NO
chr14	13272384	13299693	CiCo_mm9_circ_001778	762	-	ENSMUSG00000054423	Cadps	-	6	.	NO
chr14	13272384	13306029	CiCo_mm9_circ_001779	869	-	ENSMUSG00000054423	Cadps	-	7	.	NO
chr14	14782645	14783777	CiCo_mm9_circ_001780	195	-	ENSMUSG00000053453	Thoc7	-	3	mm9_circ_002567	100
chr14	14845586	14846169	CiCo_mm9_circ_001782	366	+	ENSMUSG00000021738	Atxn7	+	2	mm9_circ_011301	<50
chr14	14919796	14922623	CiCo_mm9_circ_001783	593	+	ENSMUSG00000021738	Atxn7	+	3	.	NO
chr14	15578481	15589945	CiCo_mm9_circ_001784	509	+	ENSMUSG00000021733	Slc4a7	+	4	.	NO
chr14	15611339	15623678	CiCo_mm9_circ_001785	473	+	ENSMUSG00000021733	Slc4a7	+	4	.	NO
chr14	17087155	17114399	CiCo_mm9_circ_001786	620	+	ENSMUSG00000021785	Ngly1	+	4	.	NO
chr14	17113206	17114399	CiCo_mm9_circ_001787	268	+	ENSMUSG00000021785	Ngly1	+	2	.	NO
chr14	17114253	17114399	CiCo_mm9_circ_001788	146	+	ENSMUSG00000021785	Ngly1	+	1	.	NO
chr14	17215575	17222493	CiCo_mm9_circ_001789	768	+	ENSMUSG00000017485	Top2b	+	6	.	NO
chr14	21170533	21175719	CiCo_mm9_circ_001791	384	+	ENSMUSG00000039599	Fam149b	+	3	.	NO
chr14	21339775	21351082	CiCo_mm9_circ_001794	1023	-	ENSMUSG00000021816	Ppp3cb	-	8	.	NO
chr14	21402543	21410835	CiCo_mm9_circ_001795	904	-	ENSMUSG00000034235	Usp54	-	7	.	NO
chr14	21407296	21410835	CiCo_mm9_circ_001796	585	-	ENSMUSG00000034235	Usp54	-	5	.	NO
chr14	21410700	21423366	CiCo_mm9_circ_001797	228	-	ENSMUSG00000034235	Usp54	-	2	.	NO
chr14	21423273	21423366	CiCo_mm9_circ_001798	93	-	ENSMUSG00000034235	Usp54	-	1	.	NO
chr14	21507607	21509242	CiCo_mm9_circ_001799	783	+	ENSMUSG00000039367	Sec24c	+	6	.	NO
chr14	22054054	22059793	CiCo_mm9_circ_001800	282	+	ENSMUSG00000039197	Adk	+	2	.	NO
chr14	22335847	22336720	CiCo_mm9_circ_001801	873	+	ENSMUSG00000021767	Myst4	+	1	mm9_circ_008231	100
chr14	22335847	22429084	CiCo_mm9_circ_001802	982	+	ENSMUSG00000021767	Myst4	+	2	mm9_circ_008231	<50
chr14	22428975	22446062	CiCo_mm9_circ_001803	945	+	ENSMUSG00000021767	Myst4	+	6	mm9_circ_015449,mm9_circ_003709	<50
chr14	22438112	22441309	CiCo_mm9_circ_001804	331	+	ENSMUSG00000021767	Myst4	+	3	mm9_circ_015449	<50
chr14	22438112	22456862	CiCo_mm9_circ_001805	1350	+	ENSMUSG00000021767	Myst4	+	9	mm9_circ_015449	100
chr14	22594184	22603018	CiCo_mm9_circ_001806	807	+	ENSMUSG00000021770	Samd8	+	3	mm9_circ_001135	<50
chr14	25009539	25012176	CiCo_mm9_circ_001809	491	-	ENSMUSG00000021782	Dlg5	-	3	mm9_circ_001889	100
chr14	26322140	26356310	CiCo_mm9_circ_001813	185	+	ENSMUSG00000007817	Zmiz1	+	2	mm9_circ_009211	100
chr14	26322140	26401159	CiCo_mm9_circ_001814	514	+	ENSMUSG00000007817	Zmiz1	+	5	mm9_circ_014961	100
chr14	26391505	26401159	CiCo_mm9_circ_001815	329	+	ENSMUSG00000007817	Zmiz1	+	3	mm9_circ_007354	100
chr14	26477592	26477759	CiCo_mm9_circ_001816	167	+	ENSMUSG00000007817	Zmiz1	+	1	.	NO
chr14	27466144	27466509	CiCo_mm9_circ_001817	191	+	ENSMUSG00000021877	Arf4	+	2	.	NO
chr14	27755833	27758787	CiCo_mm9_circ_001818	332	-	ENSMUSG00000040760	Appl1	-	3	.	NO
chr14	28251784	28255806	CiCo_mm9_circ_001819	566	+	ENSMUSG00000040651	D14Abb1e	+	5	.	NO
chr14	28303219	28303993	CiCo_mm9_circ_001820	256	-	ENSMUSG00000046753	Ccdc66	-	2	.	NO
chr14	28589344	28590428	CiCo_mm9_circ_001821	441	+	ENSMUSG00000040640	Erc2	+	2	.	NO
chr14	29084763	29116196	CiCo_mm9_circ_001822	283	+	ENSMUSG00000040640	Erc2	+	2	mm9_circ_016816	<50
chr14	31295378	31297772	CiCo_mm9_circ_001826	169	+	ENSMUSG00000021962	Dcp1a	+	2	.	NO
chr14	31378673	31382325	CiCo_mm9_circ_001827	670	+	ENSMUSG00000021957	Tkt	+	4	.	NO
chr14	31417292	31419087	CiCo_mm9_circ_001828	317	-	ENSMUSG00000021948	Prkcd	-	3	.	NO
chr14	31579148	31591178	CiCo_mm9_circ_001831	564	+	ENSMUSG00000006527	Sfmbt1	+	4	.	NO
chr14	31579148	31604002	CiCo_mm9_circ_001832	1236	+	ENSMUSG00000006527	Sfmbt1	+	9	.	NO
chr14	31582984	31610875	CiCo_mm9_circ_001833	1338	+	ENSMUSG00000006527	Sfmbt1	+	10	.	NO
chr14	31770264	31770415	CiCo_mm9_circ_001834	151	+	.	Intergenic	.	1	.	NO
chr14	31844029	31849245	CiCo_mm9_circ_001835	409	+	ENSMUSG00000042323	Pbrm1	+	3	.	NO
chr14	31844029	31853717	CiCo_mm9_circ_001836	577	+	ENSMUSG00000042323	Pbrm1	+	5	.	NO
chr14	31849128	31881150	CiCo_mm9_circ_001837	2039	+	ENSMUSG00000042323	Pbrm1	+	12	.	NO
chr14	31874654	31888168	CiCo_mm9_circ_001838	1238	+	ENSMUSG00000042323	Pbrm1	+	4	.	NO
chr14	31874654	31902808	CiCo_mm9_circ_001839	2150	+	ENSMUSG00000042323	Pbrm1	+	9	.	NO
chr14	32000244	32000904	CiCo_mm9_circ_001841	255	-	ENSMUSG00000021910	Nisch	-	2	.	NO
chr14	32176664	32183037	CiCo_mm9_circ_001843	797	+	ENSMUSG00000021893	Capn7	+	7	.	NO
chr14	32540820	32562029	CiCo_mm9_circ_001844	1196	-	ENSMUSG00000014496	Ankrd28	-	10	.	NO
chr14	32556408	32556621	CiCo_mm9_circ_001845	213	-	ENSMUSG00000014496	Ankrd28	-	1	.	NO
chr14	33051716	33055532	CiCo_mm9_circ_001847	251	+	ENSMUSG00000021911	Parg	+	2	.	NO
chr14	33339334	33340064	CiCo_mm9_circ_001848	730	+	ENSMUSG00000054051	Ercc6	+	1	mm9_circ_001192	100
chr14	33380813	33381142	CiCo_mm9_circ_001849	329	+	.	Intergenic	.	1	.	NO
chr14	34197059	34206293	CiCo_mm9_circ_001850	688	-	ENSMUSG00000021936	Mapk8	-	6	.	NO
chr14	34215809	34224210	CiCo_mm9_circ_001851	497	-	ENSMUSG00000021936	Mapk8	-	4	.	NO
chr14	35235745	35238324	CiCo_mm9_circ_001852	491	-	ENSMUSG00000021796	Bmpr1a	-	2	.	NO
chr14	35504867	35505920	CiCo_mm9_circ_001854	1053	+	ENSMUSG00000041408	Wapal	+	1	mm9_circ_002816	<50
chr14	35504867	35508291	CiCo_mm9_circ_001855	1172	+	ENSMUSG00000041408	Wapal	+	2	mm9_circ_002816	100
chr14	35537891	35539197	CiCo_mm9_circ_001856	402	+	ENSMUSG00000041408	Wapal	+	3	.	NO
chr14	35543734	35544795	CiCo_mm9_circ_001857	213	+	ENSMUSG00000041408	Wapal	+	2	.	NO
chr14	37731619	37754450	CiCo_mm9_circ_001859	1904	-	ENSMUSG00000058690	Gcap14	-	4	mm9_circ_012693,mm9_circ_002219	<50
chr14	37751769	37754450	CiCo_mm9_circ_001860	1650	-	ENSMUSG00000058690	Gcap14	-	2	mm9_circ_012693	100
chr14	41653513	41655879	CiCo_mm9_circ_001864	342	-	ENSMUSG00000037833	Sh2d4b	-	2	.	NO
chr14	41653513	41674028	CiCo_mm9_circ_001865	490	-	ENSMUSG00000037833	Sh2d4b	-	3	.	NO
chr14	41653513	41687528	CiCo_mm9_circ_001866	798	-	ENSMUSG00000037833	Sh2d4b	-	5	.	NO
chr14	41673880	41687528	CiCo_mm9_circ_001868	456	-	ENSMUSG00000037833	Sh2d4b	-	3	.	NO
chr14	45863829	45866191	CiCo_mm9_circ_001870	273	+	ENSMUSG00000049092	Gpr137c	+	2	mm9_circ_002142	100
chr14	45954327	45963402	CiCo_mm9_circ_001871	721	+	ENSMUSG00000021832	Psmc6	+	8	.	NO
chr14	46221239	46249428	CiCo_mm9_circ_001872	1599	-	ENSMUSG00000037697	Ddhd1	-	10	.	NO
chr14	46236204	46239091	CiCo_mm9_circ_001873	255	-	ENSMUSG00000037697	Ddhd1	-	2	.	NO
chr14	47398563	47399900	CiCo_mm9_circ_001874	257	-	ENSMUSG00000015759	Cnih	-	2	.	NO
chr14	47635951	47636470	CiCo_mm9_circ_001876	519	+	ENSMUSG00000021838	Samd4	+	1	mm9_circ_005305	100
chr14	47672524	47697267	CiCo_mm9_circ_001878	860	+	ENSMUSG00000021838	Samd4	+	5	.	NO
chr14	47870434	47878333	CiCo_mm9_circ_001879	542	-	ENSMUSG00000037572	Wdhd1	-	4	.	NO
chr14	49652945	49672067	CiCo_mm9_circ_001883	1074	-	ENSMUSG00000061244	Exoc5	-	10	mm9_circ_001144	100
chr14	52614554	52616082	CiCo_mm9_circ_001886	394	+	ENSMUSG00000004562	Arhgef40	+	3	.	NO
chr14	52782858	52784226	CiCo_mm9_circ_001888	260	-	ENSMUSG00000035726	Supt16h	-	2	mm9_circ_007649	<50
chr14	55167702	55171047	CiCo_mm9_circ_001891	484	-	ENSMUSG00000022177	Haus4	-	4	.	NO
chr14	55515957	55516109	CiCo_mm9_circ_001893	152	+	ENSMUSG00000092232	Gm20521	+	1	.	NO
chr14	55673271	55673487	CiCo_mm9_circ_001894	216	+	.	Intergenic	.	1	.	NO
chr14	56121061	56121868	CiCo_mm9_circ_001896	310	+	ENSMUSG00000022211	Lrrc16b	+	2	.	NO
chr14	57148524	57161767	CiCo_mm9_circ_001900	1020	-	ENSMUSG00000064128	Cenpj	-	8	.	NO
chr14	57151072	57151477	CiCo_mm9_circ_001901	179	-	ENSMUSG00000064128	Cenpj	-	2	.	NO
chr14	57170759	57182913	CiCo_mm9_circ_001902	2230	-	ENSMUSG00000064128	Cenpj	-	5	.	NO
chr14	57367671	57390843	CiCo_mm9_circ_001904	789	-	ENSMUSG00000021938	Pspc1	-	5	mm9_circ_010446	100
chr14	57390541	57390843	CiCo_mm9_circ_001905	302	-	ENSMUSG00000021938	Pspc1	-	1	mm9_circ_010446	<50
chr14	57521532	57522389	CiCo_mm9_circ_001906	857	+	ENSMUSG00000021945	Zmym2	+	1	mm9_circ_007603	100
chr14	57560834	57563074	CiCo_mm9_circ_001907	418	+	ENSMUSG00000021945	Zmym2	+	3	.	NO
chr14	57560834	57575131	CiCo_mm9_circ_001908	1075	+	ENSMUSG00000021945	Zmym2	+	8	.	NO
chr14	57566783	57575940	CiCo_mm9_circ_001909	783	+	ENSMUSG00000021945	Zmym2	+	5	.	NO
chr14	58352714	58353255	CiCo_mm9_circ_001910	541	-	ENSMUSG00000021959	Lats2	-	1	.	NO
chr14	58465757	58484478	CiCo_mm9_circ_001911	523	-	ENSMUSG00000021969	Zdhhc20	-	6	mm9_circ_009555	100
chr14	58484357	58492833	CiCo_mm9_circ_001912	225	-	ENSMUSG00000021969	Zdhhc20	-	2	mm9_circ_009945	50
chr14	60125101	60147744	CiCo_mm9_circ_001914	414	+	ENSMUSG00000021981	Cab39l	+	4	.	NO
chr14	60863350	60866303	CiCo_mm9_circ_001915	293	-	ENSMUSG00000063895	Nupl1	-	2	.	NO
chr14	61309690	61311385	CiCo_mm9_circ_001917	1695	+	ENSMUSG00000021990	Spata13	+	1	.	NO
chr14	61325550	61328406	CiCo_mm9_circ_001918	511	+	ENSMUSG00000021990	Spata13	+	2	mm9_circ_001751	100
chr14	61328261	61366463	CiCo_mm9_circ_001919	648	+	ENSMUSG00000021990	Spata13	+	4	mm9_circ_001751	<50
chr14	61364481	61366463	CiCo_mm9_circ_001920	503	+	ENSMUSG00000021990	Spata13	+	3	.	NO
chr14	61368799	61370704	CiCo_mm9_circ_001921	413	+	ENSMUSG00000021990	Spata13	+	2	.	NO
chr14	61446135	61450154	CiCo_mm9_circ_001922	437	+	ENSMUSG00000021993	Mipep	+	3	.	NO
chr14	61462044	61494144	CiCo_mm9_circ_001923	391	+	ENSMUSG00000021993	Mipep	+	4	mm9_circ_008816	100
chr14	61623911	61624090	CiCo_mm9_circ_001925	179	-	ENSMUSG00000060548	Tnfrsf19	-	1	.	NO
chr14	61643005	61643673	CiCo_mm9_circ_001926	204	-	ENSMUSG00000060548	Tnfrsf19	-	2	.	NO
chr14	62251273	62262292	CiCo_mm9_circ_001927	210	-	ENSMUSG00000087313	Dleu2	-	3	.	NO
chr14	62965404	62972474	CiCo_mm9_circ_001929	375	+	ENSMUSG00000021932	R.seh2b	+	4	.	NO
chr14	63779311	63779487	CiCo_mm9_circ_001931	176	-	.	Intergenic	.	1	.	NO
chr14	64852665	64932592	CiCo_mm9_circ_001933	294	-	ENSMUSG00000054733	Msra	-	3	.	NO
chr14	64903900	64932592	CiCo_mm9_circ_001934	189	-	ENSMUSG00000054733	Msra	-	2	.	NO
chr14	65367282	65379638	CiCo_mm9_circ_001935	880	+	ENSMUSG00000060012	Kif13b	+	6	.	NO
chr14	65444437	65447505	CiCo_mm9_circ_001936	274	-	ENSMUSG00000021972	Hmbox1	-	3	mm9_circ_007873	100
chr14	65515486	65515963	CiCo_mm9_circ_001937	477	-	ENSMUSG00000021972	Hmbox1	-	1	.	NO
chr14	65694420	65699312	CiCo_mm9_circ_001938	2702	-	ENSMUSG00000021978	Extl3	-	2	.	NO
chr14	65828528	65831060	CiCo_mm9_circ_001940	383	-	ENSMUSG00000007989	Fzd3	-	2	.	NO
chr14	65828528	65858751	CiCo_mm9_circ_001941	1330	-	ENSMUSG00000007989	Fzd3	-	4	.	NO
chr14	65853750	65858751	CiCo_mm9_circ_001942	947	-	ENSMUSG00000007989	Fzd3	-	2	.	NO
chr14	65921936	65922039	CiCo_mm9_circ_001944	103	+	ENSMUSG00000034532	Fbxo16	+	1	.	NO
chr14	66922017	66923072	CiCo_mm9_circ_001945	327	+	ENSMUSG00000022043	Trim35	+	2	.	NO
chr14	67443181	67448819	CiCo_mm9_circ_001946	333	-	ENSMUSG00000022048	Dpysl2	-	4	.	NO
chr14	70103760	70103933	CiCo_mm9_circ_001950	173	-	ENSMUSG00000034194	R3hcc1	-	1	.	NO
chr14	70550818	70552564	CiCo_mm9_circ_001951	620	-	ENSMUSG00000033712	2610301G19Rik	-	6	.	NO
chr14	72963290	72984651	CiCo_mm9_circ_001954	1335	-	ENSMUSG00000033487	Fndc3a	-	11	mm9_circ_007325	100
chr14	73051822	73083578	CiCo_mm9_circ_001955	214	-	ENSMUSG00000033487	Fndc3a	-	2	mm9_circ_005137	100
chr14	73662335	73665439	CiCo_mm9_circ_001956	480	-	ENSMUSG00000022105	Rb1	-	5	.	NO
chr14	73662335	73680071	CiCo_mm9_circ_001957	977	-	ENSMUSG00000022105	Rb1	-	10	.	NO
chr14	73662335	73682785	CiCo_mm9_circ_001958	1088	-	ENSMUSG00000022105	Rb1	-	11	.	NO
chr14	73664099	73665439	CiCo_mm9_circ_001959	283	-	ENSMUSG00000022105	Rb1	-	4	.	NO
chr14	73668917	73694837	CiCo_mm9_circ_001960	835	-	ENSMUSG00000022105	Rb1	-	9	.	NO
chr14	73968440	73968831	CiCo_mm9_circ_001961	263	+	ENSMUSG00000022110	Sucla2	+	2	.	NO
chr14	75175387	75186197	CiCo_mm9_circ_001962	326	-	ENSMUSG00000068015	Lrch1	-	3	mm9_circ_013364	100
chr14	75691375	75709609	CiCo_mm9_circ_001964	755	+	ENSMUSG00000022000	Zc3h13	+	6	.	NO
chr14	75691375	75715885	CiCo_mm9_circ_001965	953	+	ENSMUSG00000022000	Zc3h13	+	7	.	NO
chr14	76169977	76171340	CiCo_mm9_circ_001966	181	-	ENSMUSG00000022003	Slc25a30	-	2	mm9_circ_008503	100
chr14	77780385	77841706	CiCo_mm9_circ_001967	252	+	ENSMUSG00000022012	Enox1	+	2	mm9_circ_004772	<50
chr14	78011093	78037607	CiCo_mm9_circ_001968	410	+	ENSMUSG00000022012	Enox1	+	3	.	NO
chr14	78037422	78037607	CiCo_mm9_circ_001969	185	+	ENSMUSG00000022012	Enox1	+	1	.	NO
chr14	78898641	78902043	CiCo_mm9_circ_001970	208	-	ENSMUSG00000022016	Akap11	-	2	.	NO
chr14	79051487	79051568	CiCo_mm9_circ_001971	81	-	ENSMUSG00000034731	Dgkh	-	1	mm9_circ_015316	100
chr14	79382042	79409086	CiCo_mm9_circ_001972	638	+	ENSMUSG00000058997	1300010F03Rik	+	5	.	NO
chr14	79394206	79438008	CiCo_mm9_circ_001973	726	+	ENSMUSG00000058997	1300010F03Rik	+	7	.	NO
chr14	79408970	79462496	CiCo_mm9_circ_001974	1017	+	ENSMUSG00000058997	1300010F03Rik	+	9	.	NO
chr14	79739340	79740902	CiCo_mm9_circ_001975	352	-	ENSMUSG00000022020	.a16	-	3	.	NO
chr14	79755527	79769904	CiCo_mm9_circ_001976	429	-	ENSMUSG00000022020	.a16	-	4	.	NO
chr14	87171892	87266449	CiCo_mm9_circ_001982	952	-	ENSMUSG00000022021	Diap3	-	7	.	NO
chr14	87210142	87234908	CiCo_mm9_circ_001983	426	-	ENSMUSG00000022021	Diap3	-	3	.	NO
chr14	87210142	87266449	CiCo_mm9_circ_001984	796	-	ENSMUSG00000022021	Diap3	-	5	.	NO
chr14	87210142	87309930	CiCo_mm9_circ_001985	993	-	ENSMUSG00000022021	Diap3	-	7	.	NO
chr14	87251878	87266449	CiCo_mm9_circ_001987	370	-	ENSMUSG00000022021	Diap3	-	2	.	NO
chr14	87251878	87309930	CiCo_mm9_circ_001988	567	-	ENSMUSG00000022021	Diap3	-	4	.	NO
chr14	87399815	87407207	CiCo_mm9_circ_001989	388	-	ENSMUSG00000022021	Diap3	-	4	.	NO
chr14	87856840	87874647	CiCo_mm9_circ_001990	454	+	ENSMUSG00000022019	Tdrd3	+	4	mm9_circ_005369	<50
chr14	87856840	87887094	CiCo_mm9_circ_001991	1100	+	ENSMUSG00000022019	Tdrd3	+	9	mm9_circ_005369	50
chr14	87871882	87887094	CiCo_mm9_circ_001992	949	+	ENSMUSG00000022019	Tdrd3	+	7	mm9_circ_005369	100
chr14	87871882	87911577	CiCo_mm9_circ_001993	1923	+	ENSMUSG00000022019	Tdrd3	+	9	mm9_circ_005369	<50
chr14	87905565	87911577	CiCo_mm9_circ_001994	974	+	ENSMUSG00000022019	Tdrd3	+	2	.	NO
chr14	98227459	98302505	CiCo_mm9_circ_001995	715	-	ENSMUSG00000055639	Dach1	-	5	.	NO
chr14	99532454	99549960	CiCo_mm9_circ_001996	650	+	ENSMUSG00000022064	Pibf1	+	5	mm9_circ_014135	<50
chr14	99532454	99587027	CiCo_mm9_circ_001997	1058	+	ENSMUSG00000022064	Pibf1	+	8	mm9_circ_014135	100
chr14	99532454	99610289	CiCo_mm9_circ_001998	1189	+	ENSMUSG00000022064	Pibf1	+	9	mm9_circ_014135	75
chr14	99578533	99587027	CiCo_mm9_circ_001999	408	+	ENSMUSG00000022064	Pibf1	+	3	mm9_circ_014135	<50
chr14	99610158	99620862	CiCo_mm9_circ_002000	216	+	ENSMUSG00000022064	Pibf1	+	2	.	NO
chr15	100231698	100236817	CiCo_mm9_circ_002001	918	-	ENSMUSG00000023030	Slc11a2	-	8	.	NO
chr15	100314880	100318635	CiCo_mm9_circ_002002	557	-	ENSMUSG00000044636	Csrnp2	-	2	.	NO
chr15	101024362	101035008	CiCo_mm9_circ_002004	1170	+	ENSMUSG00000000532	Acvr1b	+	6	.	NO
chr15	101032408	101033525	CiCo_mm9_circ_002005	325	+	ENSMUSG00000000532	Acvr1b	+	2	.	NO
chr15	102129849	102130345	CiCo_mm9_circ_002007	217	+	ENSMUSG00000058290	Espl1	+	2	mm9_circ_000101	<50
chr15	102130233	102134576	CiCo_mm9_circ_002008	443	+	ENSMUSG00000058290	Espl1	+	3	mm9_circ_000101	100
chr15	102317518	102321234	CiCo_mm9_circ_002010	380	+	ENSMUSG00000056851	Pcbp2	+	5	.	NO
chr15	102376835	102378303	CiCo_mm9_circ_002011	367	-	ENSMUSG00000052414	Atf7	-	3	.	NO
chr15	10406561	10413161	CiCo_mm9_circ_002012	633	-	ENSMUSG00000022247	Brix1	-	8	.	NO
chr15	10513536	10522861	CiCo_mm9_circ_002013	544	-	ENSMUSG00000022246	Rai14	-	6	.	NO
chr15	10521826	10539848	CiCo_mm9_circ_002014	569	-	ENSMUSG00000022246	Rai14	-	6	.	NO
chr15	12066150	12070407	CiCo_mm9_circ_002016	647	+	ENSMUSG00000022201	Zfr	+	3	.	NO
chr15	12089353	12090445	CiCo_mm9_circ_002017	369	+	ENSMUSG00000022201	Zfr	+	2	mm9_circ_014483	100
chr15	12165772	12167774	CiCo_mm9_circ_002018	222	+	ENSMUSG00000039458	Mtmr12	+	2	.	NO
chr15	12269382	12272906	CiCo_mm9_circ_002019	247	+	ENSMUSG00000022200	Golph3	+	2	.	NO
chr15	12819373	12820302	CiCo_mm9_circ_002020	308	+	ENSMUSG00000022191	Drosha	+	3	.	NO
chr15	12819373	12835456	CiCo_mm9_circ_002021	571	+	ENSMUSG00000022191	Drosha	+	6	.	NO
chr15	18895711	18896664	CiCo_mm9_circ_002022	288	+	ENSMUSG00000022321	Cdh10	+	2	.	NO
chr15	27800915	27842489	CiCo_mm9_circ_002025	1814	-	ENSMUSG00000022263	Trio	-	9	.	NO
chr15	27830922	27842489	CiCo_mm9_circ_002026	944	-	ENSMUSG00000022263	Trio	-	4	.	NO
chr15	27842374	27849046	CiCo_mm9_circ_002027	190	-	ENSMUSG00000022263	Trio	-	2	.	NO
chr15	30548976	30577079	CiCo_mm9_circ_002029	878	+	ENSMUSG00000022240	Ctnnd2	+	4	mm9_circ_007503	50
chr15	30564398	30577079	CiCo_mm9_circ_002030	729	+	ENSMUSG00000022240	Ctnnd2	+	2	mm9_circ_008244,mm9_circ_007503,mm9_circ_018793	<50
chr15	30564398	30599361	CiCo_mm9_circ_002031	924	+	ENSMUSG00000022240	Ctnnd2	+	3	mm9_circ_018793	100
chr15	30576523	30613225	CiCo_mm9_circ_002032	1007	+	ENSMUSG00000022240	Ctnnd2	+	3	mm9_circ_008244,mm9_circ_018793	50
chr15	31408049	31416190	CiCo_mm9_circ_002033	921	-	ENSMUSG00000039100	March6	-	8	.	NO
chr15	31522400	31522807	CiCo_mm9_circ_002034	324	-	ENSMUSG00000022234	Cct5	-	2	.	NO
chr15	32478469	32480217	CiCo_mm9_circ_002038	313	+	ENSMUSG00000022231	Sema5a	+	2	.	NO
chr15	34046065	34066582	CiCo_mm9_circ_002040	770	+	ENSMUSG00000022255	Mtdh	+	6	.	NO
chr15	34047634	34066582	CiCo_mm9_circ_002041	704	+	ENSMUSG00000022255	Mtdh	+	5	.	NO
chr15	34874760	34938053	CiCo_mm9_circ_002043	651	-	ENSMUSG00000022329	Stk3	-	4	.	NO
chr15	35002184	35002976	CiCo_mm9_circ_002045	333	-	ENSMUSG00000022329	Stk3	-	2	mm9_circ_009223	<50
chr15	35002184	35045400	CiCo_mm9_circ_002046	658	-	ENSMUSG00000022329	Stk3	-	5	mm9_circ_009223	100
chr15	35029188	35045400	CiCo_mm9_circ_002047	325	-	ENSMUSG00000022329	Stk3	-	3	mm9_circ_003167	100
chr15	35347265	35347386	CiCo_mm9_circ_002048	121	+	ENSMUSG00000037646	Vps13b	+	1	mm9_circ_011859	100
chr15	35347265	35347386	CiCo_mm9_circ_002049	121	+	ENSMUSG00000037646	Vps13b	+	1	mm9_circ_011859	<50
chr15	35347265	35368733	CiCo_mm9_circ_002050	387	+	ENSMUSG00000037646	Vps13b	+	2	mm9_circ_011859	<50
chr15	35463050	35527277	CiCo_mm9_circ_002051	695	+	ENSMUSG00000037646	Vps13b	+	5	.	NO
chr15	35598455	35604707	CiCo_mm9_circ_002053	475	+	ENSMUSG00000037646	Vps13b	+	3	.	NO
chr15	37915632	37915954	CiCo_mm9_circ_002055	220	-	ENSMUSG00000037487	Ubr5	-	2	.	NO
chr15	37928041	37932472	CiCo_mm9_circ_002056	769	-	ENSMUSG00000037487	Ubr5	-	5	.	NO
chr15	37967570	37971719	CiCo_mm9_circ_002057	712	-	ENSMUSG00000037487	Ubr5	-	4	.	NO
chr15	37970507	37971719	CiCo_mm9_circ_002058	500	-	ENSMUSG00000037487	Ubr5	-	3	.	NO
chr15	38602611	38612764	CiCo_mm9_circ_002062	673	+	ENSMUSG00000022295	Atp6v1c1	+	7	.	NO
chr15	38612695	38618977	CiCo_mm9_circ_002063	354	+	ENSMUSG00000022295	Atp6v1c1	+	4	.	NO
chr15	38616558	38618977	CiCo_mm9_circ_002064	285	+	ENSMUSG00000022295	Atp6v1c1	+	3	.	NO
chr15	39123647	39177166	CiCo_mm9_circ_002065	522	+	ENSMUSG00000037386	Rims2	+	2	.	NO
chr15	39176855	39177166	CiCo_mm9_circ_002066	311	+	ENSMUSG00000037386	Rims2	+	1	.	NO
chr15	39398488	39448056	CiCo_mm9_circ_002069	516	+	ENSMUSG00000037386	Rims2	+	3	mm9_circ_011266	100
chr15	39417135	39448056	CiCo_mm9_circ_002070	415	+	ENSMUSG00000037386	Rims2	+	2	mm9_circ_015883	100
chr15	39441609	39448056	CiCo_mm9_circ_002071	320	+	ENSMUSG00000037386	Rims2	+	2	mm9_circ_012733,mm9_circ_011703,mm9_circ_011266,mm9_circ_015883	<50
chr15	3997464	4007775	CiCo_mm9_circ_002072	393	+	ENSMUSG00000022186	Oxct1	+	3	mm9_circ_000453	75
chr15	41629019	41629102	CiCo_mm9_circ_002073	83	+	ENSMUSG00000022307	Oxr1	+	1	.	NO
chr15	44228056	44252419	CiCo_mm9_circ_002074	1055	-	ENSMUSG00000038736	Nudcd1	-	6	mm9_circ_011631	75
chr15	51803291	51803873	CiCo_mm9_circ_002076	249	-	ENSMUSG00000022314	Rad21	-	2	.	NO
chr15	52919609	52939126	CiCo_mm9_circ_002077	417	-	ENSMUSG00000061731	Ext1	-	4	mm9_circ_001587	100
chr15	52937581	52939126	CiCo_mm9_circ_002078	202	-	ENSMUSG00000061731	Ext1	-	2	mm9_circ_001587	<50
chr15	54853756	54877543	CiCo_mm9_circ_002080	1478	-	ENSMUSG00000037343	Taf2	-	10	.	NO
chr15	57767645	57772354	CiCo_mm9_circ_002081	337	+	ENSMUSG00000022364	Wdr67	+	2	.	NO
chr15	57939635	57954157	CiCo_mm9_circ_002082	1543	-	ENSMUSG00000022360	Atad2	-	11	.	NO
chr15	57948322	57954157	CiCo_mm9_circ_002083	598	-	ENSMUSG00000022360	Atad2	-	5	.	NO
chr15	59155361	59156112	CiCo_mm9_circ_002084	268	+	ENSMUSG00000022351	Sqle	+	2	.	NO
chr15	61938702	61939020	CiCo_mm9_circ_002086	318	+	ENSMUSG00000072566	Pvt1	+	1	mm9_circ_011235	100
chr15	63768852	63771316	CiCo_mm9_circ_002087	324	-	ENSMUSG00000022378	Fam49b	-	3	mm9_circ_002664	<50
chr15	66426368	66426761	CiCo_mm9_circ_002089	257	+	ENSMUSG00000072501	Phf20l1	+	2	.	NO
chr15	66435588	66468594	CiCo_mm9_circ_002090	2229	+	ENSMUSG00000072501	Phf20l1	+	13	.	NO
chr15	66461361	66464463	CiCo_mm9_circ_002091	478	+	ENSMUSG00000072501	Phf20l1	+	3	.	NO
chr15	6685364	6695580	CiCo_mm9_circ_002092	295	+	ENSMUSG00000050310	Rictor	+	3	.	NO
chr15	68843787	68860340	CiCo_mm9_circ_002095	600	+	ENSMUSG00000022332	Khdrbs3	+	4	mm9_circ_016800	100
chr15	68843787	68879891	CiCo_mm9_circ_002096	683	+	ENSMUSG00000022332	Khdrbs3	+	5	mm9_circ_015717	100
chr15	71793102	71807795	CiCo_mm9_circ_002097	745	-	ENSMUSG00000079022	Col22a1	-	7	.	NO
chr15	72515712	72524087	CiCo_mm9_circ_002098	245	-	ENSMUSG00000047921	Trappc9	-	2	.	NO
chr15	72515712	72587788	CiCo_mm9_circ_002099	499	-	ENSMUSG00000047921	Trappc9	-	4	.	NO
chr15	72830401	72862073	CiCo_mm9_circ_002100	609	-	ENSMUSG00000047921	Trappc9	-	4	mm9_circ_006827	50
chr15	72843235	72862073	CiCo_mm9_circ_002101	465	-	ENSMUSG00000047921	Trappc9	-	3	mm9_circ_006827	100
chr15	72856391	72862073	CiCo_mm9_circ_002102	248	-	ENSMUSG00000047921	Trappc9	-	2	mm9_circ_006827	<50
chr15	72856391	72872633	CiCo_mm9_circ_002103	275	-	ENSMUSG00000047921	Trappc9	-	3	mm9_circ_006827	<50
chr15	72881024	72882737	CiCo_mm9_circ_002104	275	-	ENSMUSG00000047921	Trappc9	-	2	.	NO
chr15	73087463	73096632	CiCo_mm9_circ_002105	613	-	ENSMUSG00000022607	Ptk2	-	5	.	NO
chr15	73087463	73099323	CiCo_mm9_circ_002107	698	-	ENSMUSG00000022607	Ptk2	-	6	.	NO
chr15	73087463	73107343	CiCo_mm9_circ_002108	853	-	ENSMUSG00000022607	Ptk2	-	8	.	NO
chr15	73089977	73099323	CiCo_mm9_circ_002109	493	-	ENSMUSG00000022607	Ptk2	-	5	.	NO
chr15	73089977	73128675	CiCo_mm9_circ_002110	958	-	ENSMUSG00000022607	Ptk2	-	11	mm9_circ_012629	<50
chr15	73156178	73173789	CiCo_mm9_circ_002111	482	-	ENSMUSG00000022607	Ptk2	-	3	.	NO
chr15	73161278	73195625	CiCo_mm9_circ_002112	549	-	ENSMUSG00000022607	Ptk2	-	3	.	NO
chr15	73173562	73225174	CiCo_mm9_circ_002113	324	-	ENSMUSG00000022607	Ptk2	-	2	mm9_circ_004905,mm9_circ_014111	<50
chr15	73195470	73225174	CiCo_mm9_circ_002114	252	-	ENSMUSG00000022607	Ptk2	-	2	mm9_circ_004905,mm9_circ_014111	<50
chr15	74359359	74360370	CiCo_mm9_circ_002118	1011	+	ENSMUSG00000034730	Bai1	+	1	.	NO
chr15	75726161	75731685	CiCo_mm9_circ_002120	814	-	ENSMUSG00000055762	Eef1d	-	6	.	NO
chr15	75803511	75804085	CiCo_mm9_circ_002121	241	+	ENSMUSG00000034429	Zfp707	+	2	.	NO
chr15	75878651	75878794	CiCo_mm9_circ_002122	143	-	ENSMUSG00000022568	Scrib	-	1	.	NO
chr15	75894020	75895031	CiCo_mm9_circ_002123	291	-	ENSMUSG00000022568	Scrib	-	2	.	NO
chr15	76431535	76431767	CiCo_mm9_circ_002126	156	-	ENSMUSG00000034022	Cpsf1	-	2	.	NO
chr15	77638297	77643661	CiCo_mm9_circ_002128	509	-	ENSMUSG00000022443	Myh9	-	2	.	NO
chr15	78587726	78591321	CiCo_mm9_circ_002130	338	-	ENSMUSG00000018169	Mfng	-	3	.	NO
chr15	78594744	78597350	CiCo_mm9_circ_002131	257	-	ENSMUSG00000018169	Mfng	-	2	.	NO
chr15	78719432	78720298	CiCo_mm9_circ_002132	261	+	ENSMUSG00000033128	Gga1	+	2	.	NO
chr15	78802964	78804722	CiCo_mm9_circ_002133	1153	+	ENSMUSG00000033088	Triobp	+	2	.	NO
chr15	78945084	78945601	CiCo_mm9_circ_002135	191	+	ENSMUSG00000033039	Micall1	+	2	mm9_circ_011505	100
chr15	79366386	79367975	CiCo_mm9_circ_002138	233	-	ENSMUSG00000055065	Ddx17	-	3	.	NO
chr15	79366386	79369408	CiCo_mm9_circ_002139	567	-	ENSMUSG00000055065	Ddx17	-	5	.	NO
chr15	79367426	79367975	CiCo_mm9_circ_002140	173	-	ENSMUSG00000055065	Ddx17	-	2	.	NO
chr15	79371024	79371182	CiCo_mm9_circ_002141	158	-	.	Intergenic	.	1	.	NO
chr15	79371463	79373016	CiCo_mm9_circ_002142	234	-	ENSMUSG00000055065	Ddx17	-	2	mm9_circ_011064	50
chr15	79371463	79374286	CiCo_mm9_circ_002143	385	-	ENSMUSG00000055065	Ddx17	-	3	mm9_circ_011064	100
chr15	79372916	79374286	CiCo_mm9_circ_002144	251	-	ENSMUSG00000055065	Ddx17	-	2	mm9_circ_011064	<50
chr15	80066234	80078481	CiCo_mm9_circ_002145	678	+	ENSMUSG00000022412	Smcr7l	+	3	.	NO
chr15	80706746	80707091	CiCo_mm9_circ_002147	345	+	ENSMUSG00000047888	Tnrc6b	+	1	.	NO
chr15	80714636	80724884	CiCo_mm9_circ_002148	560	+	ENSMUSG00000047888	Tnrc6b	+	5	mm9_circ_017273	50
chr15	80717388	80724884	CiCo_mm9_circ_002149	384	+	ENSMUSG00000047888	Tnrc6b	+	4	mm9_circ_017273	<50
chr15	80717388	80732445	CiCo_mm9_circ_002150	516	+	ENSMUSG00000047888	Tnrc6b	+	5	mm9_circ_017273	75
chr15	80753887	80754586	CiCo_mm9_circ_002151	296	+	ENSMUSG00000047888	Tnrc6b	+	2	.	NO
chr15	8089850	8091359	CiCo_mm9_circ_002153	229	+	ENSMUSG00000022142	Nup155	+	2	mm9_circ_001790	100
chr15	8097142	8098451	CiCo_mm9_circ_002155	414	+	ENSMUSG00000022142	Nup155	+	3	.	NO
chr15	81281330	81281451	CiCo_mm9_circ_002158	121	+	ENSMUSG00000022401	Xpnpep3	+	1	.	NO
chr15	81431337	81431975	CiCo_mm9_circ_002159	638	+	ENSMUSG00000055024	Ep300	+	1	.	NO
chr15	81431337	81455064	CiCo_mm9_circ_002160	2150	+	ENSMUSG00000055024	Ep300	+	11	.	NO
chr15	81450429	81455064	CiCo_mm9_circ_002161	481	+	ENSMUSG00000055024	Ep300	+	4	.	NO
chr15	81458722	81459167	CiCo_mm9_circ_002162	325	+	ENSMUSG00000055024	Ep300	+	2	mm9_circ_005365	100
chr15	81462043	81462942	CiCo_mm9_circ_002163	329	+	ENSMUSG00000055024	Ep300	+	2	mm9_circ_008242	100
chr15	81464433	81470571	CiCo_mm9_circ_002165	582	+	ENSMUSG00000055024	Ep300	+	6	mm9_circ_003429	<50
chr15	81470170	81471855	CiCo_mm9_circ_002166	578	+	ENSMUSG00000055024	Ep300	+	4	mm9_circ_003429	100
chr15	81546996	81549352	CiCo_mm9_circ_002168	315	-	ENSMUSG00000022391	Rangap1	-	2	.	NO
chr15	8159961	8163815	CiCo_mm9_circ_002170	517	+	ENSMUSG00000039801	2410089E03Rik	+	4	.	NO
chr15	81852874	81853491	CiCo_mm9_circ_002171	394	+	ENSMUSG00000022471	Xrcc6	+	2	.	NO
chr15	81852874	81857841	CiCo_mm9_circ_002172	765	+	ENSMUSG00000022471	Xrcc6	+	4	.	NO
chr15	81857654	81857841	CiCo_mm9_circ_002173	187	+	ENSMUSG00000022471	Xrcc6	+	1	.	NO
chr15	82003182	82009977	CiCo_mm9_circ_002174	1041	+	ENSMUSG00000022463	Srebf2	+	6	.	NO
chr15	82005526	82008017	CiCo_mm9_circ_002175	519	+	ENSMUSG00000022463	Srebf2	+	3	.	NO
chr15	82012410	82015863	CiCo_mm9_circ_002176	447	+	ENSMUSG00000022463	Srebf2	+	2	.	NO
chr15	8257564	8257986	CiCo_mm9_circ_002178	235	-	ENSMUSG00000022141	Nipbl	-	2	.	NO
chr15	82655660	82687714	CiCo_mm9_circ_002179	5866	-	ENSMUSG00000041852	Tcf20	-	2	mm9_circ_000890	100
chr15	82681942	82687714	CiCo_mm9_circ_002180	5772	-	ENSMUSG00000041852	Tcf20	-	1	mm9_circ_001424	100
chr15	8275683	8280316	CiCo_mm9_circ_002181	589	-	ENSMUSG00000022141	Nipbl	-	5	.	NO
chr15	83622383	83630614	CiCo_mm9_circ_002183	487	+	ENSMUSG00000041708	Mpped1	+	2	mm9_circ_017727	100
chr15	83622383	83666928	CiCo_mm9_circ_002184	713	+	ENSMUSG00000041708	Mpped1	+	3	mm9_circ_017727	<50
chr15	84247529	84250662	CiCo_mm9_circ_002186	310	-	ENSMUSG00000062760	1810041L15Rik	-	2	.	NO
chr15	84633883	84638588	CiCo_mm9_circ_002188	576	-	ENSMUSG00000016624	Phf21b	-	3	.	NO
chr15	85068037	85074736	CiCo_mm9_circ_002190	775	+	ENSMUSG00000006369	Fbln1	+	6	.	NO
chr15	85093688	85095811	CiCo_mm9_circ_002191	275	+	ENSMUSG00000006369	Fbln1	+	2	.	NO
chr15	85189883	85207132	CiCo_mm9_circ_002192	531	+	ENSMUSG00000016541	Atxn10	+	4	mm9_circ_011119	100
chr15	85189883	85213414	CiCo_mm9_circ_002193	612	+	ENSMUSG00000016541	Atxn10	+	5	mm9_circ_011119,mm9_circ_007369	50
chr15	85195706	85223936	CiCo_mm9_circ_002194	865	+	ENSMUSG00000016541	Atxn10	+	7	mm9_circ_007369	75
chr15	85205751	85207132	CiCo_mm9_circ_002195	256	+	ENSMUSG00000016541	Atxn10	+	2	mm9_circ_011119,mm9_circ_007369	<50
chr15	85205751	85223936	CiCo_mm9_circ_002196	782	+	ENSMUSG00000016541	Atxn10	+	6	mm9_circ_007369	50
chr15	85222067	85223936	CiCo_mm9_circ_002197	279	+	ENSMUSG00000016541	Atxn10	+	2	mm9_circ_013037,mm9_circ_007369	<50
chr15	85713103	85715622	CiCo_mm9_circ_002201	273	+	ENSMUSG00000022386	Trmu	+	2	.	NO
chr15	85713103	85720757	CiCo_mm9_circ_002202	396	+	ENSMUSG00000022386	Trmu	+	3	.	NO
chr15	85789557	85793736	CiCo_mm9_circ_002203	428	-	ENSMUSG00000016028	Celsr1	-	3	.	NO
chr15	85921742	85931330	CiCo_mm9_circ_002204	332	+	ENSMUSG00000035900	Gramd4	+	2	.	NO
chr15	85985403	85996365	CiCo_mm9_circ_002206	573	-	ENSMUSG00000035891	Cerk	-	5	.	NO
chr15	86130076	86132038	CiCo_mm9_circ_002208	192	+	ENSMUSG00000051864	Tbc1d22a	+	2	.	NO
chr15	86130076	86197110	CiCo_mm9_circ_002209	493	+	ENSMUSG00000051864	Tbc1d22a	+	5	.	NO
chr15	86182083	86221634	CiCo_mm9_circ_002210	314	+	ENSMUSG00000051864	Tbc1d22a	+	3	.	NO
chr15	88519938	88522314	CiCo_mm9_circ_002211	529	-	ENSMUSG00000022387	Brd1	-	4	.	NO
chr15	88641726	88642589	CiCo_mm9_circ_002212	328	-	ENSMUSG00000035845	Alg12	-	2	mm9_circ_017350	100
chr15	88912380	88913221	CiCo_mm9_circ_002214	308	+	ENSMUSG00000015363	Trabd	+	2	.	NO
chr15	88926028	88927249	CiCo_mm9_circ_002215	412	+	ENSMUSG00000035757	1300018J18Rik	+	2	.	NO
chr15	89098933	89100393	CiCo_mm9_circ_002224	280	+	ENSMUSG00000036561	Ppp6r2	+	2	mm9_circ_013868	100
chr15	89124169	89124502	CiCo_mm9_circ_002225	258	-	ENSMUSG00000036529	Sbf1	-	2	.	NO
chr15	89135774	89136724	CiCo_mm9_circ_002226	435	-	ENSMUSG00000036529	Sbf1	-	4	.	NO
chr15	89135974	89136724	CiCo_mm9_circ_002227	306	-	ENSMUSG00000036529	Sbf1	-	3	.	NO
chr15	89182583	89182958	CiCo_mm9_circ_002228	281	-	ENSMUSG00000022614	Lmf2	-	2	.	NO
chr15	90769415	90771026	CiCo_mm9_circ_002230	283	-	ENSMUSG00000022629	Kif21a	-	2	.	NO
chr15	90827973	90828486	CiCo_mm9_circ_002231	406	-	ENSMUSG00000022629	Kif21a	-	2	.	NO
chr15	91005021	91013233	CiCo_mm9_circ_002232	529	-	ENSMUSG00000055782	Abcd2	-	4	.	NO
chr15	91327823	91346925	CiCo_mm9_circ_002233	369	-	ENSMUSG00000036298	Slc2a13	-	2	mm9_circ_011334	100
chr15	93241122	93272143	CiCo_mm9_circ_002234	366	+	ENSMUSG00000036167	Pphln1	+	3	mm9_circ_009900	<50
chr15	93285881	93295676	CiCo_mm9_circ_002235	341	+	ENSMUSG00000036167	Pphln1	+	3	mm9_circ_009900	<50
chr15	95778702	95780387	CiCo_mm9_circ_002237	494	+	ENSMUSG00000064210	Ano6	+	3	.	NO
chr15	96221306	96221620	CiCo_mm9_circ_002238	225	+	ENSMUSG00000033237	Arid2	+	2	.	NO
chr15	96440286	96454600	CiCo_mm9_circ_002239	406	-	ENSMUSG00000023169	Slc38a1	-	3	mm9_circ_010789	100
chr15	97915400	97917564	CiCo_mm9_circ_002240	179	-	ENSMUSG00000033075	Senp1	-	2	mm9_circ_007788	100
chr15	98434304	98435163	CiCo_mm9_circ_002242	859	-	ENSMUSG00000022994	Adcy6	-	1	.	NO
chr15	98905498	98905745	CiCo_mm9_circ_002244	247	+	.	Intergenic	.	1	.	NO
chr15	99459064	99461670	CiCo_mm9_circ_002248	296	-	ENSMUSG00000023015	Racgap1	-	2	.	NO
chr15	99459064	99470250	CiCo_mm9_circ_002249	962	-	ENSMUSG00000023015	Racgap1	-	8	.	NO
chr15	99461539	99462628	CiCo_mm9_circ_002250	249	-	ENSMUSG00000023015	Racgap1	-	2	.	NO
chr15	99463145	99470250	CiCo_mm9_circ_002251	548	-	ENSMUSG00000023015	Racgap1	-	5	.	NO
chr15	99473313	99473954	CiCo_mm9_circ_002252	216	-	ENSMUSG00000023015	Racgap1	-	2	.	NO
chr15	99946275	99962458	CiCo_mm9_circ_002254	198	+	ENSMUSG00000023026	Dip2b	+	2	.	NO
chr15	99946275	99972578	CiCo_mm9_circ_002255	324	+	ENSMUSG00000023026	Dip2b	+	3	.	NO
chr16	10611095	10644974	CiCo_mm9_circ_002256	813	+	ENSMUSG00000068663	Clec16a	+	8	mm9_circ_004180	100
chr16	10688572	10691683	CiCo_mm9_circ_002257	357	+	ENSMUSG00000068663	Clec16a	+	2	.	NO
chr16	11079796	11084986	CiCo_mm9_circ_002258	334	-	ENSMUSG00000022498	Txndc11	-	3	.	NO
chr16	11116887	11128796	CiCo_mm9_circ_002260	445	-	ENSMUSG00000022498	Txndc11	-	3	mm9_circ_016242	100
chr16	11122762	11128796	CiCo_mm9_circ_002261	315	-	ENSMUSG00000022498	Txndc11	-	2	mm9_circ_016242	50
chr16	11230602	11235536	CiCo_mm9_circ_002262	555	-	ENSMUSG00000062203	Gspt1	-	4	.	NO
chr16	11230602	11239192	CiCo_mm9_circ_002263	817	-	ENSMUSG00000062203	Gspt1	-	6	.	NO
chr16	11347951	11367894	CiCo_mm9_circ_002264	240	+	ENSMUSG00000079738	Snx29	+	3	mm9_circ_010266	100
chr16	11445257	11447601	CiCo_mm9_circ_002265	193	+	ENSMUSG00000071669	Snx29	+	2	.	NO
chr16	13566662	13566831	CiCo_mm9_circ_002266	169	-	ENSMUSG00000022685	Parn	-	1	.	NO
chr16	13566662	13647392	CiCo_mm9_circ_002267	866	-	ENSMUSG00000022685	Parn	-	11	mm9_circ_005629	<50
chr16	13685154	13692670	CiCo_mm9_circ_002268	857	+	ENSMUSG00000022684	Bfar	+	4	.	NO
chr16	13697425	13699168	CiCo_mm9_circ_002269	377	+	ENSMUSG00000022684	Bfar	+	2	mm9_circ_009604	100
chr16	14138435	14140465	CiCo_mm9_circ_002270	369	-	ENSMUSG00000060657	4921513D23Rik	-	2	mm9_circ_006366	100
chr16	14141735	14141894	CiCo_mm9_circ_002271	159	-	ENSMUSG00000060657	4921513D23Rik	-	1	.	NO
chr16	14175383	14185966	CiCo_mm9_circ_002272	466	+	ENSMUSG00000022678	Nde1	+	3	.	NO
chr16	14391410	14394183	CiCo_mm9_circ_002274	264	+	ENSMUSG00000023088	Abcc1	+	2	.	NO
chr16	14410792	14423353	CiCo_mm9_circ_002275	693	+	ENSMUSG00000023088	Abcc1	+	4	.	NO
chr16	14423149	14445562	CiCo_mm9_circ_002276	816	+	ENSMUSG00000023088	Abcc1	+	6	.	NO
chr16	14457980	14461301	CiCo_mm9_circ_002277	526	+	ENSMUSG00000023088	Abcc1	+	3	.	NO
chr16	15625654	15626357	CiCo_mm9_circ_002278	363	-	ENSMUSG00000022673	Mcm4	-	2	.	NO
chr16	15627741	15629760	CiCo_mm9_circ_002279	702	-	ENSMUSG00000022673	Mcm4	-	3	.	NO
chr16	15829708	15831431	CiCo_mm9_circ_002282	273	+	ENSMUSG00000022672	Prkdc	+	2	.	NO
chr16	15835982	15836054	CiCo_mm9_circ_002283	72	+	ENSMUSG00000022672	Prkdc	+	1	.	NO
chr16	15862490	15862636	CiCo_mm9_circ_002285	146	-	ENSMUSG00000022671	Mzt2	-	1	.	NO
chr16	15912611	15915480	CiCo_mm9_circ_002286	289	-	ENSMUSG00000041974	2310008H04Rik	-	3	.	NO
chr16	16037582	16037802	CiCo_mm9_circ_002287	220	-	ENSMUSG00000041974	2310008H04Rik	-	1	.	NO
chr16	16114919	16119076	CiCo_mm9_circ_002288	332	-	ENSMUSG00000041974	2310008H04Rik	-	2	.	NO
chr16	16114919	16140956	CiCo_mm9_circ_002289	555	-	ENSMUSG00000041974	2310008H04Rik	-	4	.	NO
chr16	16454084	16477606	CiCo_mm9_circ_002290	911	-	ENSMUSG00000022788	Fgd4	-	7	mm9_circ_012606	100
chr16	16454084	16504309	CiCo_mm9_circ_002291	1723	-	ENSMUSG00000022788	Fgd4	-	10	mm9_circ_012606	<50
chr16	17015990	17018568	CiCo_mm9_circ_002294	373	+	ENSMUSG00000063358	Mapk1	+	2	mm9_circ_010596	<50
chr16	17023544	17026582	CiCo_mm9_circ_002295	364	+	ENSMUSG00000063358	Mapk1	+	3	.	NO
chr16	17301085	17312564	CiCo_mm9_circ_002297	917	-	ENSMUSG00000041720	Pi4ka	-	7	.	NO
chr16	17348807	17356309	CiCo_mm9_circ_002298	737	-	ENSMUSG00000041720	Pi4ka	-	6	.	NO
chr16	17468985	17469451	CiCo_mm9_circ_002299	466	+	ENSMUSG00000006134	Crkl	+	1	.	NO
chr16	17663469	17671766	CiCo_mm9_circ_002300	249	-	ENSMUSG00000012114	Med15	-	2	.	NO
chr16	17764476	17771962	CiCo_mm9_circ_002301	429	+	ENSMUSG00000022750	Klhl22	+	2	.	NO
chr16	17764476	17784488	CiCo_mm9_circ_002302	1341	+	ENSMUSG00000022750	Klhl22	+	4	.	NO
chr16	17856844	17872778	CiCo_mm9_circ_002303	720	-	ENSMUSG00000092470	Gm20518	-	5	.	NO
chr16	18946438	18947611	CiCo_mm9_circ_002307	307	+	ENSMUSG00000022702	Hira	+	2	.	NO
chr16	20102064	20107716	CiCo_mm9_circ_002309	1044	+	ENSMUSG00000062901	Klhl24	+	2	.	NO
chr16	20106735	20107716	CiCo_mm9_circ_002310	981	+	ENSMUSG00000062901	Klhl24	+	1	.	NO
chr16	20106735	20118129	CiCo_mm9_circ_002311	1474	+	ENSMUSG00000062901	Klhl24	+	4	.	NO
chr16	20150514	20162210	CiCo_mm9_circ_002312	834	+	ENSMUSG00000041215	Yeats2	+	6	.	NO
chr16	20152981	20159325	CiCo_mm9_circ_002313	553	+	ENSMUSG00000041215	Yeats2	+	4	.	NO
chr16	20152981	20162210	CiCo_mm9_circ_002314	715	+	ENSMUSG00000041215	Yeats2	+	5	.	NO
chr16	20171263	20179748	CiCo_mm9_circ_002315	332	+	ENSMUSG00000041215	Yeats2	+	3	.	NO
chr16	20174567	20179748	CiCo_mm9_circ_002316	220	+	ENSMUSG00000041215	Yeats2	+	2	.	NO
chr16	20213339	20214565	CiCo_mm9_circ_002317	231	+	ENSMUSG00000041215	Yeats2	+	2	.	NO
chr16	20219690	20221826	CiCo_mm9_circ_002318	154	+	ENSMUSG00000041215	Yeats2	+	2	.	NO
chr16	20338948	20357631	CiCo_mm9_circ_002319	429	-	ENSMUSG00000022822	Abcc5	-	3	.	NO
chr16	20422377	20422558	CiCo_mm9_circ_002321	181	-	ENSMUSG00000022822	Abcc5	-	1	.	NO
chr16	20607836	20609159	CiCo_mm9_circ_002322	221	-	ENSMUSG00000033809	Alg3	-	2	.	NO
chr16	20656615	20657682	CiCo_mm9_circ_002323	382	+	ENSMUSG00000006998	Psmd2	+	3	.	NO
chr16	20699523	20699677	CiCo_mm9_circ_002324	154	+	.	Intergenic	.	1	.	NO
chr16	22076089	22089183	CiCo_mm9_circ_002326	940	-	ENSMUSG00000033581	Igf2bp2	-	8	.	NO
chr16	23108791	23110226	CiCo_mm9_circ_002327	442	+	ENSMUSG00000022884	Eif4a2	+	3	.	NO
chr16	23110652	23111336	CiCo_mm9_circ_002328	282	+	ENSMUSG00000022884	Eif4a2	+	2	.	NO
chr16	24442866	24457028	CiCo_mm9_circ_002329	220	+	ENSMUSG00000033306	Lpp	+	2	mm9_circ_006435	100
chr16	24608201	24608403	CiCo_mm9_circ_002330	202	+	ENSMUSG00000033306	Lpp	+	1	.	NO
chr16	30355838	30362835	CiCo_mm9_circ_002331	702	-	ENSMUSG00000022533	Atp13a3	-	6	.	NO
chr16	30543487	30547555	CiCo_mm9_circ_002332	472	-	ENSMUSG00000022537	Tmem44	-	4	.	NO
chr16	31788167	31812910	CiCo_mm9_circ_002334	906	+	ENSMUSG00000022770	Dlg1	+	7	mm9_circ_017645	50
chr16	31793589	31805820	CiCo_mm9_circ_002335	403	+	ENSMUSG00000022770	Dlg1	+	3	mm9_circ_017645	50
chr16	32033872	32040017	CiCo_mm9_circ_002336	359	-	ENSMUSG00000022781	Pak2	-	4	.	NO
chr16	32282396	32285635	CiCo_mm9_circ_002337	257	+	ENSMUSG00000014074	Rnf168	+	2	.	NO
chr16	32367429	32369513	CiCo_mm9_circ_002338	179	+	ENSMUSG00000053774	Ubxn7	+	2	.	NO
chr16	32623142	32626856	CiCo_mm9_circ_002339	581	+	ENSMUSG00000022797	Tfrc	+	6	.	NO
chr16	32884209	32891499	CiCo_mm9_circ_002340	278	+	ENSMUSG00000022800	Fyttd1	+	2	.	NO
chr16	32950377	32952269	CiCo_mm9_circ_002342	272	+	ENSMUSG00000022801	Lrch3	+	2	mm9_circ_007087,mm9_circ_002890	<50
chr16	32950377	32955491	CiCo_mm9_circ_002343	378	+	ENSMUSG00000022801	Lrch3	+	3	mm9_circ_002890	100
chr16	32950377	32961830	CiCo_mm9_circ_002344	625	+	ENSMUSG00000022801	Lrch3	+	5	mm9_circ_007087	100
chr16	32952142	32961830	CiCo_mm9_circ_002345	480	+	ENSMUSG00000022801	Lrch3	+	4	mm9_circ_007087	75
chr16	32955385	32961830	CiCo_mm9_circ_002346	353	+	ENSMUSG00000022801	Lrch3	+	3	mm9_circ_007087	50
chr16	32979481	32990404	CiCo_mm9_circ_002347	533	+	ENSMUSG00000022801	Lrch3	+	6	mm9_circ_017669	50
chr16	32986824	32988567	CiCo_mm9_circ_002348	201	+	ENSMUSG00000022801	Lrch3	+	2	mm9_circ_001040	100
chr16	32997467	32998727	CiCo_mm9_circ_002349	245	+	ENSMUSG00000022801	Lrch3	+	2	.	NO
chr16	33081016	33083199	CiCo_mm9_circ_002350	201	+	ENSMUSG00000022802	Lmln	+	2	.	NO
chr16	33226942	33229234	CiCo_mm9_circ_002351	686	+	ENSMUSG00000022807	Osbpl11	+	2	.	NO
chr16	33421406	33427415	CiCo_mm9_circ_002352	218	+	ENSMUSG00000022811	Zfp148	+	2	mm9_circ_018765,mm9_circ_000155	<50
chr16	33421406	33435060	CiCo_mm9_circ_002353	567	+	ENSMUSG00000022811	Zfp148	+	3	mm9_circ_000155	100
chr16	33421406	33468269	CiCo_mm9_circ_002354	901	+	ENSMUSG00000022811	Zfp148	+	6	mm9_circ_018765	100
chr16	33456961	33468269	CiCo_mm9_circ_002355	334	+	ENSMUSG00000022811	Zfp148	+	3	mm9_circ_018765	<50
chr16	33466940	33468269	CiCo_mm9_circ_002356	208	+	ENSMUSG00000022811	Zfp148	+	2	mm9_circ_018765	<50
chr16	33710485	33710785	CiCo_mm9_circ_002357	300	+	ENSMUSG00000075254	Heg1	+	1	.	NO
chr16	34171357	34189823	CiCo_mm9_circ_002360	904	-	ENSMUSG00000061751	Kalrn	-	8	.	NO
chr16	34235330	34252485	CiCo_mm9_circ_002361	538	-	ENSMUSG00000061751	Kalrn	-	3	.	NO
chr16	34294203	34332332	CiCo_mm9_circ_002362	801	-	ENSMUSG00000061751	Kalrn	-	5	.	NO
chr16	35298432	35299743	CiCo_mm9_circ_002363	469	+	ENSMUSG00000022840	Adcy5	+	2	.	NO
chr16	35329583	35349080	CiCo_mm9_circ_002367	280	-	ENSMUSG00000034473	Sec22a	-	2	.	NO
chr16	35348916	35361845	CiCo_mm9_circ_002368	363	-	ENSMUSG00000034473	Sec22a	-	2	.	NO
chr16	35622662	35632946	CiCo_mm9_circ_002369	350	+	ENSMUSG00000052133	Sema5b	+	3	.	NO
chr16	35645468	35646491	CiCo_mm9_circ_002370	376	+	ENSMUSG00000052133	Sema5b	+	3	.	NO
chr16	36009401	36013073	CiCo_mm9_circ_002372	195	+	ENSMUSG00000022905	Kp.1	+	2	.	NO
chr16	37877134	37878650	CiCo_mm9_circ_002374	407	+	ENSMUSG00000034158	Lrrc58	+	2	.	NO
chr16	37878372	37878650	CiCo_mm9_circ_002375	278	+	ENSMUSG00000034158	Lrrc58	+	1	.	NO
chr16	37978744	37979202	CiCo_mm9_circ_002376	241	+	ENSMUSG00000046961	Gpr156	+	2	.	NO
chr16	38170749	38220244	CiCo_mm9_circ_002378	814	+	ENSMUSG00000022812	Gsk3b	+	7	.	NO
chr16	38502649	38510891	CiCo_mm9_circ_002379	347	-	ENSMUSG00000002846	4930455C21Rik	-	4	.	NO
chr16	38502649	38518616	CiCo_mm9_circ_002380	513	-	ENSMUSG00000002846	4930455C21Rik	-	5	.	NO
chr16	39007246	39011485	CiCo_mm9_circ_002381	528	+	ENSMUSG00000022790	Igsf11	+	3	.	NO
chr16	3919480	3928631	CiCo_mm9_circ_002383	360	+	ENSMUSG00000014232	Cluap1	+	3	.	NO
chr16	3994707	3999345	CiCo_mm9_circ_002384	625	-	ENSMUSG00000039738	Slx4	-	3	.	NO
chr16	4087680	4096518	CiCo_mm9_circ_002385	1336	-	ENSMUSG00000022521	Crebbp	-	9	.	NO
chr16	4137365	4138985	CiCo_mm9_circ_002387	355	-	ENSMUSG00000022521	Crebbp	-	2	.	NO
chr16	4137365	4155033	CiCo_mm9_circ_002388	532	-	ENSMUSG00000022521	Crebbp	-	3	.	NO
chr16	41889027	41955465	CiCo_mm9_circ_002390	359	+	ENSMUSG00000061080	Lsamp	+	2	.	NO
chr16	43569793	43577861	CiCo_mm9_circ_002393	511	+	ENSMUSG00000022708	Zbtb20	+	4	mm9_circ_017140	100
chr16	44156522	44158059	CiCo_mm9_circ_002394	324	+	ENSMUSG00000022698	.a50	+	3	.	NO
chr16	44520337	44521448	CiCo_mm9_circ_002396	456	-	ENSMUSG00000022687	Boc	-	2	.	NO
chr16	44727140	44727295	CiCo_mm9_circ_002397	155	+	ENSMUSG00000036208	BC027231	+	1	.	NO
chr16	45972221	45980809	CiCo_mm9_circ_002398	703	-	ENSMUSG00000087141	Plcxd2	-	2	.	NO
chr16	46436466	46438181	CiCo_mm9_circ_002399	224	-	ENSMUSG00000022656	Pvrl3	-	2	mm9_circ_018772	100
chr16	46454736	46464272	CiCo_mm9_circ_002400	909	-	ENSMUSG00000022656	Pvrl3	-	4	.	NO
chr16	4762558	4763846	CiCo_mm9_circ_002401	237	+	ENSMUSG00000004070	Hmox2	+	2	.	NO
chr16	4947269	4957855	CiCo_mm9_circ_002402	912	-	ENSMUSG00000022515	Anks3	-	7	.	NO
chr16	50220557	50225406	CiCo_mm9_circ_002403	1291	-	ENSMUSG00000022641	Bbx	-	3	.	NO
chr16	50274659	50280652	CiCo_mm9_circ_002404	414	-	ENSMUSG00000022641	Bbx	-	2	.	NO
chr16	52033121	52047562	CiCo_mm9_circ_002405	433	+	ENSMUSG00000022637	Cblb	+	2	.	NO
chr16	52047311	52047562	CiCo_mm9_circ_002406	251	+	ENSMUSG00000022637	Cblb	+	1	.	NO
chr16	52174466	52194391	CiCo_mm9_circ_002408	733	+	ENSMUSG00000022637	Cblb	+	6	.	NO
chr16	52189125	52194391	CiCo_mm9_circ_002409	261	+	ENSMUSG00000022637	Cblb	+	2	.	NO
chr16	55860418	55860492	CiCo_mm9_circ_002410	74	-	ENSMUSG00000075033	Fam55c	-	1	mm9_circ_003433	<50
chr16	55980707	55982519	CiCo_mm9_circ_002411	468	+	ENSMUSG00000022601	Rpl24	+	2	.	NO
chr16	56082468	56124083	CiCo_mm9_circ_002412	616	+	ENSMUSG00000052917	Senp7	+	5	.	NO
chr16	57133189	57136920	CiCo_mm9_circ_002413	411	+	ENSMUSG00000022752	Tomm70a	+	3	.	NO
chr16	57191586	57198497	CiCo_mm9_circ_002414	320	-	ENSMUSG00000022749	Tbc1d23	-	3	.	NO
chr16	58424673	58433576	CiCo_mm9_circ_002416	366	+	ENSMUSG00000035107	Dcbld2	+	2	mm9_circ_015268	100
chr16	62830568	62830639	CiCo_mm9_circ_002418	71	-	ENSMUSG00000022911	Arl13b	-	1	mm9_circ_011026	<50
chr16	63595383	63603459	CiCo_mm9_circ_002419	483	-	ENSMUSG00000052504	Epha3	-	4	.	NO
chr16	63652040	63653404	CiCo_mm9_circ_002420	492	-	ENSMUSG00000052504	Epha3	-	2	mm9_circ_000594	100
chr16	63772735	63773396	CiCo_mm9_circ_002421	661	-	ENSMUSG00000052504	Epha3	-	1	mm9_circ_017801	100
chr16	70433789	70441564	CiCo_mm9_circ_002424	563	+	ENSMUSG00000022707	Gbe1	+	4	.	NO
chr16	72933457	72936031	CiCo_mm9_circ_002426	388	+	ENSMUSG00000022883	Robo1	+	3	mm9_circ_005155	100
chr16	7353024	7376062	CiCo_mm9_circ_002427	238	+	ENSMUSG00000008658	Rbfox1	+	3	.	NO
chr16	73916342	73971465	CiCo_mm9_circ_002428	2075	-	ENSMUSG00000052516	Robo2	-	12	mm9_circ_015839	<50
chr16	73928268	73985957	CiCo_mm9_circ_002429	2356	-	ENSMUSG00000052516	Robo2	-	15	mm9_circ_015839	50
chr16	73948447	73985957	CiCo_mm9_circ_002430	1749	-	ENSMUSG00000052516	Robo2	-	11	mm9_circ_015839	75
chr16	74352795	74353122	CiCo_mm9_circ_002431	327	-	ENSMUSG00000052516	Robo2	-	1	mm9_circ_012252	100
chr16	76330990	76352791	CiCo_mm9_circ_002432	194	-	ENSMUSG00000048490	Nrip1	-	2	mm9_circ_000542	100
chr16	76330990	76352794	CiCo_mm9_circ_002433	197	-	ENSMUSG00000048490	Nrip1	-	2	mm9_circ_016045	100
chr16	81432953	81443516	CiCo_mm9_circ_002436	357	+	ENSMUSG00000022762	Ncam2	+	3	.	NO
chr16	84724082	84732726	CiCo_mm9_circ_002437	641	-	ENSMUSG00000022889	Mrpl39	-	6	.	NO
chr16	84839325	84846614	CiCo_mm9_circ_002438	579	+	ENSMUSG00000008976	Gabpa	+	4	.	NO
chr16	85013871	85015605	CiCo_mm9_circ_002439	229	-	ENSMUSG00000022892	App	-	2	mm9_circ_016270	<50
chr16	85013871	85030610	CiCo_mm9_circ_002440	597	-	ENSMUSG00000022892	App	-	5	mm9_circ_016270	100
chr16	85013871	85043988	CiCo_mm9_circ_002441	822	-	ENSMUSG00000022892	App	-	7	mm9_circ_016270	50
chr16	85025097	85030610	CiCo_mm9_circ_002442	368	-	ENSMUSG00000022892	App	-	3	mm9_circ_016270	<50
chr16	85040495	85043988	CiCo_mm9_circ_002443	225	-	ENSMUSG00000022892	App	-	2	.	NO
chr16	85080084	85083133	CiCo_mm9_circ_002444	307	-	ENSMUSG00000022892	App	-	2	.	NO
chr16	85080084	85103580	CiCo_mm9_circ_002445	437	-	ENSMUSG00000022892	App	-	3	.	NO
chr16	8645461	8646357	CiCo_mm9_circ_002447	169	+	ENSMUSG00000022711	Pmm2	+	2	.	NO
chr16	87415795	87418815	CiCo_mm9_circ_002448	946	-	ENSMUSG00000052299	Ltn1	-	2	.	NO
chr16	87719051	87722853	CiCo_mm9_circ_002449	1551	+	ENSMUSG00000025612	Bach1	+	2	.	NO
chr16	89877282	89885370	CiCo_mm9_circ_002451	621	-	ENSMUSG00000002489	Tiam1	-	2	mm9_circ_008457	100
chr16	89897849	89908960	CiCo_mm9_circ_002452	1143	-	ENSMUSG00000002489	Tiam1	-	2	.	NO
chr16	90242771	90263421	CiCo_mm9_circ_002454	2653	-	ENSMUSG00000022983	Scaf4	-	18	.	NO
chr16	90464385	90481578	CiCo_mm9_circ_002455	511	+	ENSMUSG00000053414	Hunk	+	4	.	NO
chr16	90994185	90994272	CiCo_mm9_circ_002456	87	-	ENSMUSG00000022973	Synj1	-	1	mm9_circ_017544	<50
chr16	91581939	91587326	CiCo_mm9_circ_002458	321	-	ENSMUSG00000022964	Tmem50b	-	3	.	NO
chr16	91634119	91637324	CiCo_mm9_circ_002459	575	-	ENSMUSG00000022962	Gart	-	4	.	NO
chr16	91664442	91665067	CiCo_mm9_circ_002460	336	+	ENSMUSG00000022961	Son	+	2	.	NO
chr16	91782405	91794012	CiCo_mm9_circ_002461	378	+	ENSMUSG00000022957	Itsn1	+	4	mm9_circ_002489	<50
chr16	91837305	91849214	CiCo_mm9_circ_002462	725	+	ENSMUSG00000022957	Itsn1	+	4	.	NO
chr16	93759871	93760728	CiCo_mm9_circ_002464	295	+	ENSMUSG00000022946	Dopey2	+	2	.	NO
chr16	93801805	93806716	CiCo_mm9_circ_002465	328	+	ENSMUSG00000022946	Dopey2	+	3	.	NO
chr16	93849374	93854143	CiCo_mm9_circ_002467	397	+	ENSMUSG00000039456	Morc3	+	3	mm9_circ_017370	100
chr16	93855660	93866783	CiCo_mm9_circ_002468	623	+	ENSMUSG00000039456	Morc3	+	6	.	NO
chr16	93870608	93873639	CiCo_mm9_circ_002469	1047	+	ENSMUSG00000039456	Morc3	+	2	.	NO
chr16	93894981	93901601	CiCo_mm9_circ_002471	757	+	ENSMUSG00000022945	Chaf1b	+	4	.	NO
chr16	94605518	94607030	CiCo_mm9_circ_002472	437	+	ENSMUSG00000040785	Ttc3	+	4	mm9_circ_015661,mm9_circ_010404	<50
chr16	94605518	94614781	CiCo_mm9_circ_002473	802	+	ENSMUSG00000040785	Ttc3	+	8	mm9_circ_015661	100
chr16	94605518	94624975	CiCo_mm9_circ_002474	857	+	ENSMUSG00000040785	Ttc3	+	9	mm9_circ_010404	100
chr16	94605518	94633730	CiCo_mm9_circ_002475	1254	+	ENSMUSG00000040785	Ttc3	+	13	mm9_circ_010404	50
chr16	94609871	94624975	CiCo_mm9_circ_002476	420	+	ENSMUSG00000040785	Ttc3	+	5	mm9_circ_010404	75
chr16	94624920	94633730	CiCo_mm9_circ_002477	452	+	ENSMUSG00000040785	Ttc3	+	5	mm9_circ_015934	100
chr16	94641004	94645794	CiCo_mm9_circ_002479	438	+	ENSMUSG00000040785	Ttc3	+	4	mm9_circ_009810,mm9_circ_013002	<50
chr16	94833025	94881300	CiCo_mm9_circ_002482	283	+	ENSMUSG00000022897	Dyrk1a	+	2	.	NO
chr16	94833025	94899199	CiCo_mm9_circ_002483	1315	+	ENSMUSG00000022897	Dyrk1a	+	8	.	NO
chr16	94906641	94908210	CiCo_mm9_circ_002484	432	+	ENSMUSG00000022897	Dyrk1a	+	2	.	NO
chr16	96252241	96253258	CiCo_mm9_circ_002485	208	-	ENSMUSG00000022914	Brwd1	-	2	.	NO
chr16	96274131	96290234	CiCo_mm9_circ_002486	1332	-	ENSMUSG00000022914	Brwd1	-	11	.	NO
chr16	96277721	96288201	CiCo_mm9_circ_002487	895	-	ENSMUSG00000022914	Brwd1	-	8	.	NO
chr16	96286356	96290234	CiCo_mm9_circ_002488	633	-	ENSMUSG00000022914	Brwd1	-	4	.	NO
chr16	96374577	96375802	CiCo_mm9_circ_002489	183	+	ENSMUSG00000023147	Wrb	+	2	.	NO
chr16	96862344	96869871	CiCo_mm9_circ_002490	756	-	ENSMUSG00000050272	Dscam	-	4	.	NO
chr16	97260504	97278372	CiCo_mm9_circ_002491	465	-	ENSMUSG00000050272	Dscam	-	2	mm9_circ_000234	100
chr17	10431757	10431901	CiCo_mm9_circ_002492	144	-	ENSMUSG00000062078	Qk	-	1	mm9_circ_007613	100
chr17	10431757	10475846	CiCo_mm9_circ_002493	404	-	ENSMUSG00000062078	Qk	-	3	mm9_circ_007613	<50
chr17	10466811	10475846	CiCo_mm9_circ_002494	260	-	ENSMUSG00000062078	Qk	-	2	.	NO
chr17	12446947	12465086	CiCo_mm9_circ_002495	2624	-	ENSMUSG00000014426	Map3k4	-	9	.	NO
chr17	13112216	13113732	CiCo_mm9_circ_002496	518	+	ENSMUSG00000068039	Tcp1	+	4	.	NO
chr17	13112680	13113323	CiCo_mm9_circ_002497	293	+	ENSMUSG00000068039	Tcp1	+	2	.	NO
chr17	13113605	13115598	CiCo_mm9_circ_002498	427	+	ENSMUSG00000068039	Tcp1	+	3	.	NO
chr17	13940945	13947577	CiCo_mm9_circ_002499	637	+	ENSMUSG00000068036	Mllt4	+	4	.	NO
chr17	15627119	15631487	CiCo_mm9_circ_002501	320	-	ENSMUSG00000014769	Psmb1	-	3	.	NO
chr17	15879120	15880194	CiCo_mm9_circ_002502	316	+	ENSMUSG00000023852	Chd1	+	2	.	NO
chr17	17707837	17712351	CiCo_mm9_circ_002503	547	-	ENSMUSG00000023845	Lnpep	-	4	.	NO
chr17	24224970	24248084	CiCo_mm9_circ_002506	1328	-	ENSMUSG00000024122	Pdpk1	-	10	mm9_circ_006096	75
chr17	24228387	24248084	CiCo_mm9_circ_002507	1110	-	ENSMUSG00000024122	Pdpk1	-	9	mm9_circ_006096	100
chr17	24361852	24363728	CiCo_mm9_circ_002508	398	-	ENSMUSG00000072082	Ccnf	-	3	.	NO
chr17	24582519	24582889	CiCo_mm9_circ_002510	370	-	.	Intergenic	.	1	.	NO
chr17	24722867	24723319	CiCo_mm9_circ_002511	355	+	ENSMUSG00000032855	Pkd1	+	2	.	NO
chr17	25038284	25038474	CiCo_mm9_circ_002512	190	-	ENSMUSG00000024163	Mapk8ip3	-	1	.	NO
chr17	25129214	25140350	CiCo_mm9_circ_002513	481	-	ENSMUSG00000038002	Cramp1l	-	4	mm9_circ_011433	100
chr17	25243716	25250202	CiCo_mm9_circ_002515	946	-	ENSMUSG00000024170	Telo2	-	7	.	NO
chr17	25247171	25250202	CiCo_mm9_circ_002517	598	-	ENSMUSG00000024170	Telo2	-	4	.	NO
chr17	25336711	25338120	CiCo_mm9_circ_002518	311	+	ENSMUSG00000015127	Unkl	+	2	.	NO
chr17	25336711	25350051	CiCo_mm9_circ_002519	793	+	ENSMUSG00000015127	Unkl	+	7	.	NO
chr17	25336711	25350051	CiCo_mm9_circ_002520	793	+	ENSMUSG00000015127	Unkl	+	7	.	NO
chr17	25371752	25372056	CiCo_mm9_circ_002521	214	-	ENSMUSG00000035521	Gnptg	-	2	.	NO
chr17	25372126	25372572	CiCo_mm9_circ_002522	292	-	ENSMUSG00000035521	Gnptg	-	3	mm9_circ_009131	100
chr17	25372289	25372572	CiCo_mm9_circ_002523	209	-	ENSMUSG00000035521	Gnptg	-	2	mm9_circ_009131	50
chr17	25372478	25372572	CiCo_mm9_circ_002524	94	-	ENSMUSG00000035521	Gnptg	-	1	mm9_circ_009131	<50
chr17	25977996	25978427	CiCo_mm9_circ_002526	206	-	ENSMUSG00000093593	RP23-356J2.13	-	2	.	NO
chr17	25992452	25994189	CiCo_mm9_circ_002527	485	-	ENSMUSG00000073434	Wdr90	-	4	.	NO
chr17	26110035	26110324	CiCo_mm9_circ_002528	289	-	ENSMUSG00000037326	Solh	-	1	.	NO
chr17	26134873	26150862	CiCo_mm9_circ_002529	378	-	ENSMUSG00000037098	Rab11fip3	-	4	.	NO
chr17	26150718	26161411	CiCo_mm9_circ_002530	448	-	ENSMUSG00000037098	Rab11fip3	-	4	.	NO
chr17	26403227	26404303	CiCo_mm9_circ_002532	255	+	ENSMUSG00000024188	Luc7l	+	2	mm9_circ_003008	100
chr17	26876487	26880076	CiCo_mm9_circ_002533	1216	+	ENSMUSG00000048249	A930001N09Rik	+	2	mm9_circ_004122	50
chr17	26876487	26880076	CiCo_mm9_circ_002535	1216	+	ENSMUSG00000048249	A930001N09Rik	+	2	mm9_circ_004122	100
chr17	26876487	26900393	CiCo_mm9_circ_002536	1534	+	ENSMUSG00000048249	A930001N09Rik	+	4	mm9_circ_015157	100
chr17	26894749	26894944	CiCo_mm9_circ_002537	195	+	ENSMUSG00000048249	A930001N09Rik	+	1	mm9_circ_015157	<50
chr17	27057741	27058064	CiCo_mm9_circ_002538	235	+	ENSMUSG00000024301	Kifc5b	+	2	.	NO
chr17	27923015	27931008	CiCo_mm9_circ_002542	353	-	ENSMUSG00000056692	D17Wsu92e	-	2	.	NO
chr17	28013607	28014358	CiCo_mm9_circ_002543	294	+	ENSMUSG00000039512	Uhrf1bp1	+	3	.	NO
chr17	28122010	28132999	CiCo_mm9_circ_002544	988	+	ENSMUSG00000024219	Anks1	+	7	.	NO
chr17	28565296	28566308	CiCo_mm9_circ_002545	258	-	ENSMUSG00000024222	Fkbp5	-	2	.	NO
chr17	28850718	28852386	CiCo_mm9_circ_002546	189	+	ENSMUSG00000053436	Mapk14	+	2	mm9_circ_017753	100
chr17	28942873	28947614	CiCo_mm9_circ_002547	1628	+	ENSMUSG00000063952	Brpf3	+	2	.	NO
chr17	28942873	28958537	CiCo_mm9_circ_002548	3012	+	ENSMUSG00000063952	Brpf3	+	7	.	NO
chr17	28955280	28955583	CiCo_mm9_circ_002549	303	+	ENSMUSG00000063952	Brpf3	+	1	.	NO
chr17	29986101	29994674	CiCo_mm9_circ_002551	915	-	ENSMUSG00000043557	Mdga1	-	5	.	NO
chr17	30650500	30661922	CiCo_mm9_circ_002554	605	-	ENSMUSG00000062202	Btbd9	-	3	mm9_circ_003671	50
chr17	30650500	30667310	CiCo_mm9_circ_002555	1181	-	ENSMUSG00000062202	Btbd9	-	5	mm9_circ_003671	100
chr17	30661657	30667310	CiCo_mm9_circ_002556	841	-	ENSMUSG00000062202	Btbd9	-	3	mm9_circ_003671	<50
chr17	32357105	32362658	CiCo_mm9_circ_002557	1062	-	ENSMUSG00000024002	Brd4	-	5	.	NO
chr17	32366361	32366680	CiCo_mm9_circ_002558	319	-	ENSMUSG00000024002	Brd4	-	1	.	NO
chr17	32447522	32448039	CiCo_mm9_circ_002560	236	-	ENSMUSG00000024045	Akap8	-	2	.	NO
chr17	32449346	32451055	CiCo_mm9_circ_002561	1709	-	.	Intergenic	.	1	.	NO
chr17	34080502	34080881	CiCo_mm9_circ_002566	287	+	ENSMUSG00000024312	Wdr46	+	2	.	NO
chr17	34169771	34170656	CiCo_mm9_circ_002567	375	+	ENSMUSG00000039656	Rxrb	+	2	.	NO
chr17	34169989	34170465	CiCo_mm9_circ_002568	476	+	.	Intergenic	.	1	.	NO
chr17	34253542	34254156	CiCo_mm9_circ_002569	396	-	ENSMUSG00000024335	Brd2	-	2	.	NO
chr17	3437227	3454351	CiCo_mm9_circ_002570	1105	+	ENSMUSG00000023800	Tiam2	+	8	.	NO
chr17	3437227	3477278	CiCo_mm9_circ_002571	1209	+	ENSMUSG00000023800	Tiam2	+	9	.	NO
chr17	3448377	3454351	CiCo_mm9_circ_002572	700	+	ENSMUSG00000023800	Tiam2	+	5	.	NO
chr17	3448377	3477278	CiCo_mm9_circ_002573	804	+	ENSMUSG00000023800	Tiam2	+	6	.	NO
chr17	35149434	35149593	CiCo_mm9_circ_002574	159	+	ENSMUSG00000007029	Vars	+	1	.	NO
chr17	35150209	35150692	CiCo_mm9_circ_002575	231	+	ENSMUSG00000007029	Vars	+	2	.	NO
chr17	35233248	35235945	CiCo_mm9_circ_002577	414	+	ENSMUSG00000007036	Abhd16a	+	4	.	NO
chr17	35825483	35827125	CiCo_mm9_circ_002579	670	-	ENSMUSG00000003534	Ddr1	-	4	.	NO
chr17	36025028	36026545	CiCo_mm9_circ_002582	512	+	ENSMUSG00000024422	Dhx16	+	4	.	NO
chr17	39979943	39980165	CiCo_mm9_circ_002583	222	+	.	Intergenic	.	1	mm9_circ_015352	<50
chr17	39980067	39980222	CiCo_mm9_circ_002584	155	-	.	Intergenic	.	1	.	NO
chr17	39981169	39981360	CiCo_mm9_circ_002585	191	+	.	Intergenic	.	1	.	NO
chr17	39981174	39981346	CiCo_mm9_circ_002586	172	-	.	Intergenic	.	1	mm9_circ_014320	<50
chr17	39981195	39981346	CiCo_mm9_circ_002587	151	-	.	Intergenic	.	1	mm9_circ_014320	<50
chr17	39981414	39981665	CiCo_mm9_circ_002588	251	+	.	Intergenic	.	1	mm9_circ_018683,mm9_circ_018032,mm9_circ_011696,mm9_circ_007174,mm9_circ_010749,mm9_circ_009370,mm9_circ_005915,mm9_circ_017278	<50
chr17	39981416	39981728	CiCo_mm9_circ_002589	312	+	.	Intergenic	.	1	mm9_circ_018683,mm9_circ_018032,mm9_circ_011696,mm9_circ_007174,mm9_circ_010749,mm9_circ_009370,mm9_circ_005915,mm9_circ_017278	<50
chr17	39981501	39982478	CiCo_mm9_circ_002590	977	-	.	Intergenic	.	1	mm9_circ_011671,mm9_circ_014903,mm9_circ_005444,mm9_circ_015214,mm9_circ_006032,mm9_circ_003160	<50
chr17	39981642	39982138	CiCo_mm9_circ_002592	496	+	.	Intergenic	.	1	mm9_circ_005915	100
chr17	39981719	39982114	CiCo_mm9_circ_002593	395	-	.	Intergenic	.	1	.	NO
chr17	39981999	39982146	CiCo_mm9_circ_002594	147	+	.	Intergenic	.	1	mm9_circ_008939	100
chr17	39981999	39982160	CiCo_mm9_circ_002595	161	+	.	Intergenic	.	1	mm9_circ_008939	75
chr17	39982002	39982138	CiCo_mm9_circ_002596	136	+	.	Intergenic	.	1	mm9_circ_008939	75
chr17	39982002	39982503	CiCo_mm9_circ_002597	501	+	.	Intergenic	.	1	mm9_circ_013874	50
chr17	39982077	39982233	CiCo_mm9_circ_002599	156	+	.	Intergenic	.	1	mm9_circ_015798,mm9_circ_013874,mm9_circ_016863	50
chr17	39982105	39982323	CiCo_mm9_circ_002600	218	+	.	Intergenic	.	1	mm9_circ_013874	75
chr17	39982160	39982323	CiCo_mm9_circ_002601	163	+	.	Intergenic	.	1	mm9_circ_013874,mm9_circ_014395	50
chr17	39982308	39982470	CiCo_mm9_circ_002602	162	-	.	Intergenic	.	1	mm9_circ_005444	50
chr17	39982400	39982505	CiCo_mm9_circ_002603	105	-	.	Intergenic	.	1	mm9_circ_003160	75
chr17	39982400	39982510	CiCo_mm9_circ_002604	110	-	.	Intergenic	.	1	mm9_circ_003160	100
chr17	39982447	39982602	CiCo_mm9_circ_002605	155	+	.	Intergenic	.	1	mm9_circ_018683,mm9_circ_010658,mm9_circ_015273	<50
chr17	39982707	39982856	CiCo_mm9_circ_002606	149	+	.	Intergenic	.	1	mm9_circ_012405	<50
chr17	39982799	39982898	CiCo_mm9_circ_002607	99	+	.	Intergenic	.	1	mm9_circ_012405	100
chr17	39982857	39983049	CiCo_mm9_circ_002608	192	+	.	Intergenic	.	1	mm9_circ_012405	<50
chr17	39985278	39985566	CiCo_mm9_circ_002713	288	+	ENSMUSG00000045999	AY036118	-	1	.	NO
chr17	39985436	39985671	CiCo_mm9_circ_002717	235	+	ENSMUSG00000045999	AY036118	-	1	.	NO
chr17	42942108	42962880	CiCo_mm9_circ_002720	1000	-	ENSMUSG00000061665	Cd2ap	-	9	.	NO
chr17	43201916	43202182	CiCo_mm9_circ_002721	266	+	ENSMUSG00000023915	Tnfrsf21	+	1	.	NO
chr17	45131265	45140178	CiCo_mm9_circ_002722	231	+	ENSMUSG00000038954	Supt3h	+	2	.	NO
chr17	45170186	45185341	CiCo_mm9_circ_002723	579	+	ENSMUSG00000038954	Supt3h	+	5	mm9_circ_002722	100
chr17	45724176	45724619	CiCo_mm9_circ_002724	195	-	ENSMUSG00000023942	Slc29a1	-	2	.	NO
chr17	45814874	45816663	CiCo_mm9_circ_002725	393	-	ENSMUSG00000036026	Tmem63b	-	4	.	NO
chr17	46162295	46165348	CiCo_mm9_circ_002726	246	-	ENSMUSG00000023951	Vegfa	-	2	.	NO
chr17	46341603	46345206	CiCo_mm9_circ_002727	516	+	ENSMUSG00000067150	Xpo5	+	4	.	NO
chr17	46375321	46375936	CiCo_mm9_circ_002728	145	+	ENSMUSG00000067150	Xpo5	+	2	mm9_circ_014192	100
chr17	46723149	46728751	CiCo_mm9_circ_002729	1149	-	ENSMUSG00000023972	Ptk7	-	6	.	NO
chr17	46819860	46820082	CiCo_mm9_circ_002730	222	+	ENSMUSG00000002768	Mea1	+	1	.	NO
chr17	46821613	46822378	CiCo_mm9_circ_002731	230	-	ENSMUSG00000059409	Ppp2r5d	-	2	.	NO
chr17	47093506	47094363	CiCo_mm9_circ_002732	370	-	ENSMUSG00000023977	Ubr2	-	3	.	NO
chr17	47635126	47638389	CiCo_mm9_circ_002733	319	-	ENSMUSG00000023980	Taf8	-	3	.	NO
chr17	47786898	47810367	CiCo_mm9_circ_002734	1449	+	ENSMUSG00000090115	Usp49	+	2	.	NO
chr17	48025073	48041483	CiCo_mm9_circ_002736	335	-	ENSMUSG00000023991	Foxp4	-	2	.	NO
chr17	5040579	5097732	CiCo_mm9_circ_002741	354	+	ENSMUSG00000069729	Arid1b	+	2	mm9_circ_011781,mm9_circ_018649	<50
chr17	5040579	5127024	CiCo_mm9_circ_002742	465	+	ENSMUSG00000069729	Arid1b	+	3	mm9_circ_011781,mm9_circ_018649	<50
chr17	50745619	50750520	CiCo_mm9_circ_002743	2691	+	ENSMUSG00000038910	Plcl2	+	2	mm9_circ_016423	100
chr17	50745619	50779516	CiCo_mm9_circ_002744	2767	+	ENSMUSG00000038910	Plcl2	+	3	mm9_circ_016423	<50
chr17	5097573	5127024	CiCo_mm9_circ_002746	270	+	ENSMUSG00000069729	Arid1b	+	2	.	NO
chr17	50991857	51014033	CiCo_mm9_circ_002747	250	-	ENSMUSG00000023923	Tbc1d5	-	2	.	NO
chr17	51056851	51074883	CiCo_mm9_circ_002748	486	-	ENSMUSG00000023923	Tbc1d5	-	5	.	NO
chr17	51907216	51924965	CiCo_mm9_circ_002750	936	-	ENSMUSG00000023927	Satb1	-	4	.	NO
chr17	51942755	51948612	CiCo_mm9_circ_002751	673	-	ENSMUSG00000023927	Satb1	-	4	.	NO
chr17	5242827	5279382	CiCo_mm9_circ_002752	514	+	ENSMUSG00000069729	Arid1b	+	3	.	NO
chr17	5264031	5279382	CiCo_mm9_circ_002753	270	+	ENSMUSG00000069729	Arid1b	+	2	.	NO
chr17	55630240	55637704	CiCo_mm9_circ_002757	375	+	ENSMUSG00000024172	St6gal2	+	3	.	NO
chr17	55801760	55827256	CiCo_mm9_circ_002759	1002	-	ENSMUSG00000024174	Pot1b	-	8	.	NO
chr17	56491055	56493062	CiCo_mm9_circ_002760	456	+	ENSMUSG00000024201	Kdm4b	+	3	.	NO
chr17	56491055	56495479	CiCo_mm9_circ_002761	650	+	ENSMUSG00000024201	Kdm4b	+	4	.	NO
chr17	56515276	56525702	CiCo_mm9_circ_002762	335	+	ENSMUSG00000024201	Kdm4b	+	2	.	NO
chr17	56563765	56564247	CiCo_mm9_circ_002763	482	-	.	Intergenic	.	1	.	NO
chr17	56586782	56597800	CiCo_mm9_circ_002766	774	-	ENSMUSG00000013236	Ptprs	-	5	.	NO
chr17	56591074	56597800	CiCo_mm9_circ_002767	663	-	ENSMUSG00000013236	Ptprs	-	4	.	NO
chr17	56846284	56847703	CiCo_mm9_circ_002768	393	+	ENSMUSG00000002372	Ranbp3	+	4	mm9_circ_016002	100
chr17	56926031	56927183	CiCo_mm9_circ_002769	302	-	ENSMUSG00000024206	Rfx2	-	2	.	NO
chr17	6185136	6207057	CiCo_mm9_circ_002774	645	+	ENSMUSG00000034377	Tulp4	+	4	.	NO
chr17	6198671	6201834	CiCo_mm9_circ_002775	316	+	ENSMUSG00000034377	Tulp4	+	2	.	NO
chr17	63820756	63840236	CiCo_mm9_circ_002776	513	-	ENSMUSG00000023965	Fbxl17	-	3	mm9_circ_008387	100
chr17	64245366	64260913	CiCo_mm9_circ_002777	540	+	ENSMUSG00000000127	Fer	+	3	.	NO
chr17	64283638	64290829	CiCo_mm9_circ_002778	313	+	ENSMUSG00000000127	Fer	+	2	.	NO
chr17	64330831	64341065	CiCo_mm9_circ_002779	327	+	ENSMUSG00000000127	Fer	+	2	.	NO
chr17	64636341	64647250	CiCo_mm9_circ_002780	721	-	ENSMUSG00000024083	Pja2	-	5	.	NO
chr17	65941630	65944394	CiCo_mm9_circ_002784	338	-	ENSMUSG00000024091	Vapa	-	3	mm9_circ_014222	100
chr17	66152499	66165390	CiCo_mm9_circ_002786	994	+	ENSMUSG00000061950	Ppp4r1	+	8	mm9_circ_008748	<50
chr17	66152550	66153306	CiCo_mm9_circ_002787	192	+	ENSMUSG00000061950	Ppp4r1	+	2	.	NO
chr17	66152550	66165390	CiCo_mm9_circ_002788	943	+	ENSMUSG00000061950	Ppp4r1	+	8	mm9_circ_008748	<50
chr17	66187023	66187364	CiCo_mm9_circ_002789	256	+	ENSMUSG00000061950	Ppp4r1	+	2	.	NO
chr17	66201459	66203539	CiCo_mm9_circ_002790	354	-	ENSMUSG00000024096	Ralbp1	-	3	.	NO
chr17	66386832	66402431	CiCo_mm9_circ_002792	502	-	ENSMUSG00000034647	Ankrd12	-	4	mm9_circ_015645	50
chr17	66785419	66787731	CiCo_mm9_circ_002793	384	-	ENSMUSG00000052105	1110012J17Rik	-	2	.	NO
chr17	69557198	69559723	CiCo_mm9_circ_002794	416	+	ENSMUSG00000024044	Epb4.1l3	+	2	mm9_circ_009155	100
chr17	71574279	71574581	CiCo_mm9_circ_002795	302	+	ENSMUSG00000024052	Lpin2	+	1	.	NO
chr17	71727487	71729039	CiCo_mm9_circ_002796	274	-	ENSMUSG00000024054	Smchd1	-	2	.	NO
chr17	71786045	71798186	CiCo_mm9_circ_002797	825	-	ENSMUSG00000024054	Smchd1	-	6	mm9_circ_004742	100
chr17	71786045	71805840	CiCo_mm9_circ_002798	1039	-	ENSMUSG00000024054	Smchd1	-	8	mm9_circ_004742	50
chr17	71791215	71793388	CiCo_mm9_circ_002799	258	-	ENSMUSG00000024054	Smchd1	-	2	mm9_circ_004742	<50
[truncated: 3,076 more rows]

## Sheet: miRNA seed prediction
Dori et al., Sequence and Expression Levels of Circular-RNAs in Progenitor Cell Types During Mouse Corticogenesis
miRNA seed prediction
seed_number	miRNA	circID	circ_length
99	mmu-miR-7b-5p	CiCo_mm9_circ_006933	2927
46	mmu-miR-1187	CiCo_mm9_circ_006344	78704
43	mmu-miR-204-3p	CiCo_mm9_circ_006933	2927
43	mmu-miR-466i-5p	CiCo_mm9_circ_006344	78704
42	mmu-miR-7685-3p	CiCo_mm9_circ_006933	2927
41	mmu-miR-7684-5p	CiCo_mm9_circ_006933	2927
37	mmu-miR-466k	CiCo_mm9_circ_006344	78704
36	mmu-miR-7019-5p	CiCo_mm9_circ_006933	2927
30	mmu-miR-669c-3p	CiCo_mm9_circ_006344	78704
29	mmu-miR-7a-5p	CiCo_mm9_circ_006933	2927
27	mmu-miR-149-3p	CiCo_mm9_circ_006344	78704
27	mmu-miR-5110	CiCo_mm9_circ_006344	78704
27	mmu-miR-6368	CiCo_mm9_circ_006933	2927
26	mmu-miR-7016-5p	CiCo_mm9_circ_006344	78704
24	mmu-miR-6971-5p	CiCo_mm9_circ_006344	78704
24	mmu-miR-6980-5p	CiCo_mm9_circ_006344	78704
24	mmu-miR-7047-5p	CiCo_mm9_circ_006344	78704
22	mmu-miR-1966-5p	CiCo_mm9_circ_006344	78704
22	mmu-miR-7012-5p	CiCo_mm9_circ_006344	78704
21	mmu-miR-677-3p	CiCo_mm9_circ_006344	78704
21	mmu-miR-6940-5p	CiCo_mm9_circ_006344	78704
21	mmu-miR-7016-3p	CiCo_mm9_circ_006344	78704
21	mmu-miR-7054-5p	CiCo_mm9_circ_006344	78704
20	mmu-miR-1249-5p	CiCo_mm9_circ_006344	78704
20	mmu-miR-1906	CiCo_mm9_circ_006344	78704
20	mmu-miR-3087-5p	CiCo_mm9_circ_006344	78704
20	mmu-miR-346-3p	CiCo_mm9_circ_006344	78704
20	mmu-miR-6931-5p	CiCo_mm9_circ_006344	78704
20	mmu-miR-8119	CiCo_mm9_circ_006344	78704
19	mmu-miR-466f	CiCo_mm9_circ_006344	78704
19	mmu-miR-6965-5p	CiCo_mm9_circ_006344	78704
19	mmu-miR-7001-5p	CiCo_mm9_circ_006344	78704
19	mmu-miR-762	CiCo_mm9_circ_006344	78704
18	mmu-miR-6942-5p	CiCo_mm9_circ_006344	78704
18	mmu-miR-6981-5p	CiCo_mm9_circ_006344	78704
18	mmu-miR-6987-5p	CiCo_mm9_circ_006344	78704
18	mmu-miR-7030-5p	CiCo_mm9_circ_006344	78704
18	mmu-miR-7669-3p	CiCo_mm9_circ_006344	78704
17	mmu-miR-1943-5p	CiCo_mm9_circ_006344	78704
17	mmu-miR-3064-5p	CiCo_mm9_circ_006344	78704
17	mmu-miR-3113-3p	CiCo_mm9_circ_006344	78704
17	mmu-miR-504-3p	CiCo_mm9_circ_006344	78704
17	mmu-miR-6925-5p	CiCo_mm9_circ_006344	78704
17	mmu-miR-6991-3p	CiCo_mm9_circ_006344	78704
17	mmu-miR-7081-5p	CiCo_mm9_circ_006344	78704
17	mmu-miR-7118-5p	CiCo_mm9_circ_006344	78704
16	mmu-miR-5107-5p	CiCo_mm9_circ_006344	78704
16	mmu-miR-6418-5p	CiCo_mm9_circ_006344	78704
16	mmu-miR-7033-5p	CiCo_mm9_circ_006344	78704
16	mmu-miR-7075-5p	CiCo_mm9_circ_006344	78704
16	mmu-miR-7076-5p	CiCo_mm9_circ_006344	78704
16	mmu-miR-7094b-2-5p	CiCo_mm9_circ_006344	78704
16	mmu-miR-7222-3p	CiCo_mm9_circ_006344	78704
16	mmu-miR-7649-3p	CiCo_mm9_circ_006344	78704
16	mmu-miR-7665-5p	CiCo_mm9_circ_006344	78704
16	mmu-miR-8113	CiCo_mm9_circ_006344	78704
16	mmu-miR-9768-3p	CiCo_mm9_circ_006344	78704
15	mmu-miR-1231-5p	CiCo_mm9_circ_006344	78704
15	mmu-miR-466d-5p	CiCo_mm9_circ_006344	78704
15	mmu-miR-671-5p	CiCo_mm9_circ_006344	78704
15	mmu-miR-6912-5p	CiCo_mm9_circ_006344	78704
15	mmu-miR-6934-3p	CiCo_mm9_circ_006344	78704
15	mmu-miR-6945-3p	CiCo_mm9_circ_006344	78704
15	mmu-miR-6953-5p	CiCo_mm9_circ_006344	78704
15	mmu-miR-7000-5p	CiCo_mm9_circ_006344	78704
15	mmu-miR-7005-5p	CiCo_mm9_circ_006344	78704
15	mmu-miR-709	CiCo_mm9_circ_006344	78704
15	mmu-miR-7090-5p	CiCo_mm9_circ_006344	78704
15	mmu-miR-7117-5p	CiCo_mm9_circ_006344	78704
15	mmu-miR-7226-5p	CiCo_mm9_circ_006344	78704
15	mmu-miR-760-5p	CiCo_mm9_circ_006344	78704
15	mmu-miR-874-5p	CiCo_mm9_circ_006344	78704
14	mmu-miR-1231-3p	CiCo_mm9_circ_006344	78704
14	mmu-miR-1894-5p	CiCo_mm9_circ_006344	78704
14	mmu-miR-326-5p	CiCo_mm9_circ_006344	78704
14	mmu-miR-330-5p	CiCo_mm9_circ_006344	78704
14	mmu-miR-378d	CiCo_mm9_circ_006344	78704
14	mmu-miR-574-5p	CiCo_mm9_circ_006344	78704
14	mmu-miR-667-5p	CiCo_mm9_circ_006344	78704
14	mmu-miR-6914-5p	CiCo_mm9_circ_006344	78704
14	mmu-miR-6975-5p	CiCo_mm9_circ_006344	78704
14	mmu-miR-6989-5p	CiCo_mm9_circ_006344	78704
14	mmu-miR-7023-5p	CiCo_mm9_circ_006344	78704
14	mmu-miR-7028-5p	CiCo_mm9_circ_006344	78704
14	mmu-miR-7048-5p	CiCo_mm9_circ_006344	78704
14	mmu-miR-7050-5p	CiCo_mm9_circ_006344	78704
14	mmu-miR-7058-5p	CiCo_mm9_circ_006344	78704
14	mmu-miR-7064-5p	CiCo_mm9_circ_006344	78704
14	mmu-miR-8100	CiCo_mm9_circ_006344	78704
13	mmu-miR-298-5p	CiCo_mm9_circ_006344	78704
13	mmu-miR-3113-5p	CiCo_mm9_circ_006344	78704
13	mmu-miR-3154	CiCo_mm9_circ_006344	78704
13	mmu-miR-5125	CiCo_mm9_circ_006344	78704
13	mmu-miR-6916-5p	CiCo_mm9_circ_006344	78704
13	mmu-miR-6918-5p	CiCo_mm9_circ_006344	78704
13	mmu-miR-7085-5p	CiCo_mm9_circ_006344	78704
13	mmu-miR-92a-2-5p	CiCo_mm9_circ_006344	78704
12	mmu-miR-1291	CiCo_mm9_circ_006344	78704
12	mmu-miR-149-5p	CiCo_mm9_circ_006344	78704
12	mmu-miR-1894-3p	CiCo_mm9_circ_006344	78704
12	mmu-miR-1962	CiCo_mm9_circ_006344	78704
12	mmu-miR-214-3p	CiCo_mm9_circ_006344	78704
12	mmu-miR-3085-3p	CiCo_mm9_circ_006344	78704
12	mmu-miR-3547-5p	CiCo_mm9_circ_006344	78704
12	mmu-miR-466a-5p	CiCo_mm9_circ_006344	78704
12	mmu-miR-485-5p	CiCo_mm9_circ_006344	78704
12	mmu-miR-497b	CiCo_mm9_circ_006344	78704
12	mmu-miR-5113	CiCo_mm9_circ_006344	78704
12	mmu-miR-6405	CiCo_mm9_circ_006933	2927
12	mmu-miR-665-3p	CiCo_mm9_circ_006344	78704
12	mmu-miR-6905-5p	CiCo_mm9_circ_006344	78704
12	mmu-miR-6911-5p	CiCo_mm9_circ_006344	78704
12	mmu-miR-6929-5p	CiCo_mm9_circ_006344	78704
12	mmu-miR-6939-5p	CiCo_mm9_circ_006344	78704
12	mmu-miR-6992-5p	CiCo_mm9_circ_006344	78704
12	mmu-miR-7049-5p	CiCo_mm9_circ_006344	78704
12	mmu-miR-7235-5p	CiCo_mm9_circ_006344	78704
12	mmu-miR-760-3p	CiCo_mm9_circ_006344	78704
12	mmu-miR-7662-3p	CiCo_mm9_circ_006344	78704
11	mmu-miR-12181-3p	CiCo_mm9_circ_006344	78704
11	mmu-miR-2861	CiCo_mm9_circ_006344	78704
11	mmu-miR-3058-5p	CiCo_mm9_circ_006344	78704
11	mmu-miR-3085-5p	CiCo_mm9_circ_006344	78704
11	mmu-miR-331-3p	CiCo_mm9_circ_006344	78704
11	mmu-miR-339-5p	CiCo_mm9_circ_006344	78704
11	mmu-miR-3474	CiCo_mm9_circ_006344	78704
11	mmu-miR-466j	CiCo_mm9_circ_006344	78704
11	mmu-miR-466m-5p	CiCo_mm9_circ_006344	78704
11	mmu-miR-466p-5p	CiCo_mm9_circ_006344	78704
11	mmu-miR-669m-5p	CiCo_mm9_circ_006344	78704
11	mmu-miR-6909-3p	CiCo_mm9_circ_006344	78704
11	mmu-miR-6922-5p	CiCo_mm9_circ_006344	78704
11	mmu-miR-6923-5p	CiCo_mm9_circ_006344	78704
11	mmu-miR-6969-5p	CiCo_mm9_circ_006344	78704
11	mmu-miR-6974-5p	CiCo_mm9_circ_006344	78704
11	mmu-miR-6999-5p	CiCo_mm9_circ_006344	78704
11	mmu-miR-7004-3p	CiCo_mm9_circ_006344	78704
11	mmu-miR-7018-5p	CiCo_mm9_circ_006344	78704
11	mmu-miR-7035-5p	CiCo_mm9_circ_006344	78704
11	mmu-miR-7042-5p	CiCo_mm9_circ_006344	78704
11	mmu-miR-7067-5p	CiCo_mm9_circ_006344	78704
11	mmu-miR-7069-5p	CiCo_mm9_circ_006344	78704
11	mmu-miR-7074-5p	CiCo_mm9_circ_006933	2927
11	mmu-miR-7087-3p	CiCo_mm9_circ_006344	78704
11	mmu-miR-7662-5p	CiCo_mm9_circ_006344	78704
11	mmu-miR-874-3p	CiCo_mm9_circ_006344	78704
10	mmu-miR-12185-3p	CiCo_mm9_circ_006344	78704
10	mmu-miR-12185-5p	CiCo_mm9_circ_006344	78704
10	mmu-miR-12187-5p	CiCo_mm9_circ_006344	78704
10	mmu-miR-12194-3p	CiCo_mm9_circ_006344	78704
10	mmu-miR-146b-3p	CiCo_mm9_circ_006344	78704
10	mmu-miR-204-3p	CiCo_mm9_circ_006344	78704
10	mmu-miR-3057-3p	CiCo_mm9_circ_006344	78704
10	mmu-miR-3104-5p	CiCo_mm9_circ_006344	78704
10	mmu-miR-3110-5p	CiCo_mm9_circ_006344	78704
10	mmu-miR-320-5p	CiCo_mm9_circ_006344	78704
10	mmu-miR-328-5p	CiCo_mm9_circ_006344	78704
10	mmu-miR-466e-5p	CiCo_mm9_circ_006344	78704
10	mmu-miR-505-5p	CiCo_mm9_circ_006344	78704
10	mmu-miR-5134-5p	CiCo_mm9_circ_006344	78704
10	mmu-miR-5627-5p	CiCo_mm9_circ_006344	78704
10	mmu-miR-6900-5p	CiCo_mm9_circ_006344	78704
10	mmu-miR-6906-5p	CiCo_mm9_circ_006344	78704
10	mmu-miR-6926-5p	CiCo_mm9_circ_006344	78704
10	mmu-miR-6927-3p	CiCo_mm9_circ_006344	78704
10	mmu-miR-6947-3p	CiCo_mm9_circ_006344	78704
10	mmu-miR-6950-5p	CiCo_mm9_circ_006344	78704
10	mmu-miR-6979-3p	CiCo_mm9_circ_006344	78704
10	mmu-miR-7006-5p	CiCo_mm9_circ_006344	78704
10	mmu-miR-7007-5p	CiCo_mm9_circ_006344	78704
10	mmu-miR-7015-5p	CiCo_mm9_circ_006344	78704
10	mmu-miR-7032-5p	CiCo_mm9_circ_006344	78704
10	mmu-miR-7044-5p	CiCo_mm9_circ_006344	78704
10	mmu-miR-7056-5p	CiCo_mm9_circ_006344	78704
10	mmu-miR-7648-3p	CiCo_mm9_circ_006344	78704
10	mmu-miR-7656-3p	CiCo_mm9_circ_006344	78704
10	mmu-miR-7682-3p	CiCo_mm9_circ_006344	78704
10	mmu-miR-7684-5p	CiCo_mm9_circ_006344	78704
10	mmu-miR-7688-5p	CiCo_mm9_circ_006344	78704
10	mmu-miR-8093	CiCo_mm9_circ_006344	78704
9	mmu-miR-12181-5p	CiCo_mm9_circ_006344	78704
9	mmu-miR-185-3p	CiCo_mm9_circ_006344	78704
9	mmu-miR-185-5p	CiCo_mm9_circ_006344	78704
9	mmu-miR-1907	CiCo_mm9_circ_006344	78704
9	mmu-miR-1941-5p	CiCo_mm9_circ_006344	78704
9	mmu-miR-1968-3p	CiCo_mm9_circ_006344	78704
9	mmu-miR-221-5p	CiCo_mm9_circ_006344	78704
9	mmu-miR-2861	CiCo_mm9_circ_002984	839
9	mmu-miR-2861	CiCo_mm9_circ_002985	1548
9	mmu-miR-296-5p	CiCo_mm9_circ_006344	78704
9	mmu-miR-3102-5p	CiCo_mm9_circ_006344	78704
9	mmu-miR-326-3p	CiCo_mm9_circ_006344	78704
9	mmu-miR-344f-5p	CiCo_mm9_circ_006344	78704
9	mmu-miR-3473e	CiCo_mm9_circ_006344	78704
9	mmu-miR-34a-5p	CiCo_mm9_circ_006344	78704
9	mmu-miR-34c-5p	CiCo_mm9_circ_006344	78704
9	mmu-miR-3544-3p	CiCo_mm9_circ_006344	78704
9	mmu-miR-370-3p	CiCo_mm9_circ_006344	78704
9	mmu-miR-449b	CiCo_mm9_circ_006344	78704
9	mmu-miR-466c-5p	CiCo_mm9_circ_006344	78704
9	mmu-miR-466n-5p	CiCo_mm9_circ_006344	78704
9	mmu-miR-491-5p	CiCo_mm9_circ_006344	78704
9	mmu-miR-5623-5p	CiCo_mm9_circ_006344	78704
9	mmu-miR-6361	CiCo_mm9_circ_006344	78704
9	mmu-miR-665-5p	CiCo_mm9_circ_006344	78704
9	mmu-miR-6919-3p	CiCo_mm9_circ_006344	78704
9	mmu-miR-6923-3p	CiCo_mm9_circ_006344	78704
9	mmu-miR-6926-3p	CiCo_mm9_circ_006344	78704
9	mmu-miR-6958-5p	CiCo_mm9_circ_006344	78704
9	mmu-miR-6964-5p	CiCo_mm9_circ_006344	78704
9	mmu-miR-6965-3p	CiCo_mm9_circ_006344	78704
9	mmu-miR-6972-5p	CiCo_mm9_circ_006344	78704
9	mmu-miR-6976-5p	CiCo_mm9_circ_006344	78704
9	mmu-miR-6979-5p	CiCo_mm9_circ_006344	78704
9	mmu-miR-6990-3p	CiCo_mm9_circ_006344	78704
9	mmu-miR-7018-3p	CiCo_mm9_circ_006344	78704
9	mmu-miR-7047-3p	CiCo_mm9_circ_006344	78704
9	mmu-miR-7049-3p	CiCo_mm9_circ_006344	78704
9	mmu-miR-7051-5p	CiCo_mm9_circ_006344	78704
9	mmu-miR-7062-5p	CiCo_mm9_circ_006344	78704
9	mmu-miR-7068-3p	CiCo_mm9_circ_006344	78704
9	mmu-miR-7079-5p	CiCo_mm9_circ_006344	78704
9	mmu-miR-7081-3p	CiCo_mm9_circ_006344	78704
9	mmu-miR-7083-3p	CiCo_mm9_circ_006344	78704
9	mmu-miR-7216-5p	CiCo_mm9_circ_006344	78704
9	mmu-miR-761	CiCo_mm9_circ_006344	78704
9	mmu-miR-7679-5p	CiCo_mm9_circ_006344	78704
9	mmu-miR-7681-3p	CiCo_mm9_circ_006344	78704
9	mmu-miR-8108	CiCo_mm9_circ_006344	78704
9	mmu-miR-9769-3p	CiCo_mm9_circ_006344	78704
8	mmu-miR-12188-3p	CiCo_mm9_circ_006344	78704
8	mmu-miR-1224-3p	CiCo_mm9_circ_006344	78704
8	mmu-miR-1224-5p	CiCo_mm9_circ_006344	78704
8	mmu-miR-125a-5p	CiCo_mm9_circ_006344	78704
8	mmu-miR-18a-3p	CiCo_mm9_circ_006344	78704
8	mmu-miR-1911-3p	CiCo_mm9_circ_006344	78704
8	mmu-miR-1933-3p	CiCo_mm9_circ_006344	78704
8	mmu-miR-1946a	CiCo_mm9_circ_006344	78704
8	mmu-miR-1956	CiCo_mm9_circ_006344	78704
8	mmu-miR-1968-5p	CiCo_mm9_circ_006344	78704
8	mmu-miR-24-3p	CiCo_mm9_circ_006344	78704
8	mmu-miR-3072-5p	CiCo_mm9_circ_006344	78704
8	mmu-miR-3076-5p	CiCo_mm9_circ_006344	78704
8	mmu-miR-3103-5p	CiCo_mm9_circ_006344	78704
8	mmu-miR-324-3p	CiCo_mm9_circ_006344	78704
8	mmu-miR-3473a	CiCo_mm9_circ_006344	78704
8	mmu-miR-3473b	CiCo_mm9_circ_006344	78704
8	mmu-miR-449a-5p	CiCo_mm9_circ_006344	78704
8	mmu-miR-449c-5p	CiCo_mm9_circ_006344	78704
8	mmu-miR-466h-5p	CiCo_mm9_circ_006344	78704
8	mmu-miR-5120	CiCo_mm9_circ_006344	78704
8	mmu-miR-6354	CiCo_mm9_circ_006344	78704
8	mmu-miR-6369	CiCo_mm9_circ_006344	78704
8	mmu-miR-6388	CiCo_mm9_circ_006344	78704
8	mmu-miR-6408	CiCo_mm9_circ_006344	78704
8	mmu-miR-6539	CiCo_mm9_circ_006344	78704
8	mmu-miR-669f-5p	CiCo_mm9_circ_006344	78704
8	mmu-miR-6715-5p	CiCo_mm9_circ_006344	78704
8	mmu-miR-673-5p	CiCo_mm9_circ_006344	78704
8	mmu-miR-6904-5p	CiCo_mm9_circ_006344	78704
8	mmu-miR-6921-5p	CiCo_mm9_circ_006344	78704
8	mmu-miR-6929-3p	CiCo_mm9_circ_006344	78704
8	mmu-miR-6930-5p	CiCo_mm9_circ_006344	78704
8	mmu-miR-6956-5p	CiCo_mm9_circ_006344	78704
8	mmu-miR-6958-3p	CiCo_mm9_circ_006344	78704
8	mmu-miR-6971-3p	CiCo_mm9_circ_006344	78704
8	mmu-miR-6978-5p	CiCo_mm9_circ_006344	78704
8	mmu-miR-698-5p	CiCo_mm9_circ_006344	78704
8	mmu-miR-6982-3p	CiCo_mm9_circ_006344	78704
8	mmu-miR-6982-5p	CiCo_mm9_circ_006344	78704
8	mmu-miR-6991-5p	CiCo_mm9_circ_006344	78704
8	mmu-miR-6992-5p	CiCo_mm9_circ_001647	13112
8	mmu-miR-6998-5p	CiCo_mm9_circ_006344	78704
8	mmu-miR-7005-3p	CiCo_mm9_circ_006344	78704
8	mmu-miR-7017-3p	CiCo_mm9_circ_006344	78704
8	mmu-miR-7022-5p	CiCo_mm9_circ_006344	78704
8	mmu-miR-7023-3p	CiCo_mm9_circ_006344	78704
8	mmu-miR-7024-5p	CiCo_mm9_circ_006344	78704
8	mmu-miR-7025-5p	CiCo_mm9_circ_006344	78704
8	mmu-miR-7031-5p	CiCo_mm9_circ_006344	78704
8	mmu-miR-7035-3p	CiCo_mm9_circ_006344	78704
8	mmu-miR-7043-3p	CiCo_mm9_circ_006344	78704
8	mmu-miR-705	CiCo_mm9_circ_006344	78704
8	mmu-miR-7052-3p	CiCo_mm9_circ_006344	78704
8	mmu-miR-7053-5p	CiCo_mm9_circ_006344	78704
8	mmu-miR-7063-5p	CiCo_mm9_circ_006344	78704
8	mmu-miR-7069-3p	CiCo_mm9_circ_006344	78704
8	mmu-miR-7074-3p	CiCo_mm9_circ_006344	78704
8	mmu-miR-7074-5p	CiCo_mm9_circ_006344	78704
8	mmu-miR-7082-3p	CiCo_mm9_circ_006344	78704
8	mmu-miR-7088-5p	CiCo_mm9_circ_006344	78704
8	mmu-miR-7212-3p	CiCo_mm9_circ_006344	78704
8	mmu-miR-7212-5p	CiCo_mm9_circ_006344	78704
8	mmu-miR-7220-3p	CiCo_mm9_circ_006344	78704
8	mmu-miR-7239-3p	CiCo_mm9_circ_006344	78704
8	mmu-miR-742-3p	CiCo_mm9_circ_006344	78704
8	mmu-miR-7647-3p	CiCo_mm9_circ_006344	78704
7	mmu-miR-105	CiCo_mm9_circ_006344	78704
7	mmu-miR-12186-3p	CiCo_mm9_circ_006344	78704
7	mmu-miR-12189-3p	CiCo_mm9_circ_006344	78704
7	mmu-miR-12192-5p	CiCo_mm9_circ_006344	78704
7	mmu-miR-12201-3p	CiCo_mm9_circ_006344	78704
7	mmu-miR-125b-2-3p	CiCo_mm9_circ_006344	78704
7	mmu-miR-134-5p	CiCo_mm9_circ_006344	78704
7	mmu-miR-1927	CiCo_mm9_circ_006344	78704
7	mmu-miR-1934-5p	CiCo_mm9_circ_006344	78704
7	mmu-miR-1943-3p	CiCo_mm9_circ_006344	78704
7	mmu-miR-1953	CiCo_mm9_circ_006344	78704
7	mmu-miR-216a-3p	CiCo_mm9_circ_006344	78704
7	mmu-miR-297a-5p	CiCo_mm9_circ_006344	78704
7	mmu-miR-3082-5p	CiCo_mm9_circ_006344	78704
7	mmu-miR-3091-3p	CiCo_mm9_circ_006344	78704
7	mmu-miR-3093-3p	CiCo_mm9_circ_006344	78704
7	mmu-miR-3099-3p	CiCo_mm9_circ_006344	78704
7	mmu-miR-3110-3p	CiCo_mm9_circ_006344	78704
7	mmu-miR-328-3p	CiCo_mm9_circ_006344	78704
7	mmu-miR-337-3p	CiCo_mm9_circ_006344	78704
7	mmu-miR-342-3p	CiCo_mm9_circ_006344	78704
7	mmu-miR-346-5p	CiCo_mm9_circ_006344	78704
7	mmu-miR-3473c	CiCo_mm9_circ_006344	78704
7	mmu-miR-3572-5p	CiCo_mm9_circ_006344	78704
7	mmu-miR-3971	CiCo_mm9_circ_006344	78704
7	mmu-miR-423-5p	CiCo_mm9_circ_006344	78704
7	mmu-miR-484	CiCo_mm9_circ_006344	78704
7	mmu-miR-503-5p	CiCo_mm9_circ_006344	78704
7	mmu-miR-5132-5p	CiCo_mm9_circ_006344	78704
7	mmu-miR-6368	CiCo_mm9_circ_006344	78704
7	mmu-miR-6394	CiCo_mm9_circ_006344	78704
7	mmu-miR-664-5p	CiCo_mm9_circ_006344	78704
7	mmu-miR-672-3p	CiCo_mm9_circ_006344	78704
7	mmu-miR-6769b-5p	CiCo_mm9_circ_006344	78704
7	mmu-miR-6917-5p	CiCo_mm9_circ_006344	78704
7	mmu-miR-6934-5p	CiCo_mm9_circ_006344	78704
7	mmu-miR-6945-5p	CiCo_mm9_circ_006344	78704
7	mmu-miR-6952-3p	CiCo_mm9_circ_006344	78704
7	mmu-miR-6954-5p	CiCo_mm9_circ_006344	78704
7	mmu-miR-6961-3p	CiCo_mm9_circ_006344	78704
7	mmu-miR-6967-5p	CiCo_mm9_circ_006344	78704
7	mmu-miR-6986-5p	CiCo_mm9_circ_006344	78704
7	mmu-miR-6988-5p	CiCo_mm9_circ_006344	78704
7	mmu-miR-6996-5p	CiCo_mm9_circ_006344	78704
7	mmu-miR-7000-3p	CiCo_mm9_circ_006344	78704
7	mmu-miR-7011-3p	CiCo_mm9_circ_006344	78704
7	mmu-miR-7015-3p	CiCo_mm9_circ_006344	78704
7	mmu-miR-7019-5p	CiCo_mm9_circ_006344	78704
7	mmu-miR-7020-3p	CiCo_mm9_circ_006344	78704
7	mmu-miR-7020-5p	CiCo_mm9_circ_006344	78704
7	mmu-miR-7021-3p	CiCo_mm9_circ_006344	78704
7	mmu-miR-7024-3p	CiCo_mm9_circ_006344	78704
7	mmu-miR-7029-3p	CiCo_mm9_circ_006344	78704
7	mmu-miR-7031-3p	CiCo_mm9_circ_006344	78704
7	mmu-miR-7037-5p	CiCo_mm9_circ_006344	78704
7	mmu-miR-7040-3p	CiCo_mm9_circ_006344	78704
7	mmu-miR-7045-3p	CiCo_mm9_circ_006344	78704
7	mmu-miR-7048-5p	CiCo_mm9_circ_000778	5745
7	mmu-miR-7078-5p	CiCo_mm9_circ_006344	78704
7	mmu-miR-7119-5p	CiCo_mm9_circ_006344	78704
7	mmu-miR-7213-5p	CiCo_mm9_circ_006344	78704
7	mmu-miR-7215-3p	CiCo_mm9_circ_006344	78704
7	mmu-miR-7578	CiCo_mm9_circ_006344	78704
7	mmu-miR-7676-5p	CiCo_mm9_circ_006344	78704
6	mmu-miR-12178-5p	CiCo_mm9_circ_006344	78704
6	mmu-miR-12188-5p	CiCo_mm9_circ_006344	78704
6	mmu-miR-12202-5p	CiCo_mm9_circ_006344	78704
6	mmu-miR-128-3p	CiCo_mm9_circ_006344	78704
6	mmu-miR-140-3p	CiCo_mm9_circ_006344	78704
6	mmu-miR-143-5p	CiCo_mm9_circ_006344	78704
6	mmu-miR-1892	CiCo_mm9_circ_006344	78704
6	mmu-miR-1982-5p	CiCo_mm9_circ_006344	78704
6	mmu-miR-210-5p	CiCo_mm9_circ_006344	78704
6	mmu-miR-25-5p	CiCo_mm9_circ_006344	78704
6	mmu-miR-3059-5p	CiCo_mm9_circ_006344	78704
6	mmu-miR-3070-5p	CiCo_mm9_circ_006344	78704
6	mmu-miR-3083b-5p	CiCo_mm9_circ_006344	78704
6	mmu-miR-3099-5p	CiCo_mm9_circ_006344	78704
6	mmu-miR-3102-3p	CiCo_mm9_circ_006344	78704
6	mmu-miR-324-5p	CiCo_mm9_circ_006344	78704
6	mmu-miR-343	CiCo_mm9_circ_006344	78704
6	mmu-miR-344-5p	CiCo_mm9_circ_006344	78704
6	mmu-miR-344c-5p	CiCo_mm9_circ_006344	78704
6	mmu-miR-344d-1-5p	CiCo_mm9_circ_006344	78704
6	mmu-miR-344g-3p	CiCo_mm9_circ_006344	78704
6	mmu-miR-344g-5p	CiCo_mm9_circ_006344	78704
6	mmu-miR-344i	CiCo_mm9_circ_006344	78704
6	mmu-miR-34b-5p	CiCo_mm9_circ_006344	78704
6	mmu-miR-361-3p	CiCo_mm9_circ_006344	78704
6	mmu-miR-383-3p	CiCo_mm9_circ_006344	78704
6	mmu-miR-3966	CiCo_mm9_circ_006344	78704
6	mmu-miR-432	CiCo_mm9_circ_006344	78704
6	mmu-miR-451b	CiCo_mm9_circ_006344	78704
6	mmu-miR-466i-3p	CiCo_mm9_circ_006344	78704
6	mmu-miR-504-5p	CiCo_mm9_circ_006344	78704
6	mmu-miR-5106	CiCo_mm9_circ_006344	78704
6	mmu-miR-5110	CiCo_mm9_circ_004462	4501
6	mmu-miR-5135	CiCo_mm9_circ_006344	78704
6	mmu-miR-5620-5p	CiCo_mm9_circ_006344	78704
6	mmu-miR-5627-3p	CiCo_mm9_circ_006344	78704
6	mmu-miR-615-5p	CiCo_mm9_circ_006344	78704
6	mmu-miR-6337	CiCo_mm9_circ_006344	78704
6	mmu-miR-6356	CiCo_mm9_circ_006344	78704
6	mmu-miR-6391	CiCo_mm9_circ_006344	78704
6	mmu-miR-6405	CiCo_mm9_circ_006344	78704
6	mmu-miR-6413	CiCo_mm9_circ_006344	78704
6	mmu-miR-667-3p	CiCo_mm9_circ_006344	78704
6	mmu-miR-673-3p	CiCo_mm9_circ_006344	78704
6	mmu-miR-6901-5p	CiCo_mm9_circ_006344	78704
6	mmu-miR-6908-5p	CiCo_mm9_circ_006344	78704
6	mmu-miR-6918-3p	CiCo_mm9_circ_006344	78704
6	mmu-miR-6919-5p	CiCo_mm9_circ_006344	78704
6	mmu-miR-6920-3p	CiCo_mm9_circ_006344	78704
6	mmu-miR-6935-5p	CiCo_mm9_circ_006344	78704
6	mmu-miR-6943-5p	CiCo_mm9_circ_006344	78704
6	mmu-miR-6955-5p	CiCo_mm9_circ_006344	78704
6	mmu-miR-6961-5p	CiCo_mm9_circ_006344	78704
6	mmu-miR-6962-3p	CiCo_mm9_circ_006344	78704
6	mmu-miR-6966-3p	CiCo_mm9_circ_006344	78704
6	mmu-miR-6985-5p	CiCo_mm9_circ_006344	78704
6	mmu-miR-6998-3p	CiCo_mm9_circ_006344	78704
6	mmu-miR-7008-5p	CiCo_mm9_circ_006344	78704
6	mmu-miR-702-5p	CiCo_mm9_circ_006344	78704
6	mmu-miR-7022-3p	CiCo_mm9_circ_006344	78704
6	mmu-miR-7028-3p	CiCo_mm9_circ_006344	78704
6	mmu-miR-7050-3p	CiCo_mm9_circ_006344	78704
6	mmu-miR-7064-3p	CiCo_mm9_circ_006344	78704
6	mmu-miR-7072-5p	CiCo_mm9_circ_006344	78704
6	mmu-miR-7077-3p	CiCo_mm9_circ_006344	78704
6	mmu-miR-7081-5p	CiCo_mm9_circ_004462	4501
6	mmu-miR-7094-1-5p	CiCo_mm9_circ_006344	78704
6	mmu-miR-7231-5p	CiCo_mm9_circ_006344	78704
6	mmu-miR-7242-3p	CiCo_mm9_circ_006344	78704
6	mmu-miR-7655-5p	CiCo_mm9_circ_006344	78704
6	mmu-miR-7659-5p	CiCo_mm9_circ_006344	78704
6	mmu-miR-8103	CiCo_mm9_circ_006344	78704
6	mmu-miR-8109	CiCo_mm9_circ_006344	78704
5	mmu-let-7c-5p	CiCo_mm9_circ_006344	78704
5	mmu-miR-1192	CiCo_mm9_circ_006344	78704
5	mmu-miR-1258-5p	CiCo_mm9_circ_002454	2653
5	mmu-miR-125a-3p	CiCo_mm9_circ_006344	78704
5	mmu-miR-1264-5p	CiCo_mm9_circ_006344	78704
5	mmu-miR-133a-3p	CiCo_mm9_circ_006344	78704
5	mmu-miR-133b-3p	CiCo_mm9_circ_006344	78704
5	mmu-miR-133c	CiCo_mm9_circ_006344	78704
5	mmu-miR-1906	CiCo_mm9_circ_001647	13112
5	mmu-miR-194-1-3p	CiCo_mm9_circ_006344	78704
5	mmu-miR-194-2-3p	CiCo_mm9_circ_006344	78704
5	mmu-miR-1954	CiCo_mm9_circ_006344	78704
5	mmu-miR-1970	CiCo_mm9_circ_006344	78704
5	mmu-miR-207	CiCo_mm9_circ_006344	78704
5	mmu-miR-211-5p	CiCo_mm9_circ_006344	78704
5	mmu-miR-214-5p	CiCo_mm9_circ_006344	78704
5	mmu-miR-290b-3p	CiCo_mm9_circ_006344	78704
5	mmu-miR-292b-3p	CiCo_mm9_circ_006344	78704
5	mmu-miR-3072-3p	CiCo_mm9_circ_006344	78704
5	mmu-miR-3081-3p	CiCo_mm9_circ_006344	78704
5	mmu-miR-3081-5p	CiCo_mm9_circ_006344	78704
5	mmu-miR-3082-3p	CiCo_mm9_circ_006344	78704
5	mmu-miR-3083-5p	CiCo_mm9_circ_006344	78704
5	mmu-miR-330-5p	CiCo_mm9_circ_001647	13112
5	mmu-miR-345-5p	CiCo_mm9_circ_006344	78704
5	mmu-miR-346-3p	CiCo_mm9_circ_001647	13112
5	mmu-miR-351-5p	CiCo_mm9_circ_006344	78704
5	mmu-miR-378a-3p	CiCo_mm9_circ_006344	78704
5	mmu-miR-378c	CiCo_mm9_circ_006344	78704
5	mmu-miR-378d	CiCo_mm9_circ_001647	13112
5	mmu-miR-452-3p	CiCo_mm9_circ_006344	78704
5	mmu-miR-466f-3p	CiCo_mm9_circ_006344	78704
5	mmu-miR-466f-5p	CiCo_mm9_circ_006344	78704
5	mmu-miR-466l-5p	CiCo_mm9_circ_006344	78704
5	mmu-miR-466m-3p	CiCo_mm9_circ_006344	78704
5	mmu-miR-486a-3p	CiCo_mm9_circ_006344	78704
5	mmu-miR-497a-5p	CiCo_mm9_circ_006344	78704
5	mmu-miR-5110	CiCo_mm9_circ_001647	13112
5	mmu-miR-5114	CiCo_mm9_circ_006344	78704
5	mmu-miR-5124b	CiCo_mm9_circ_006344	78704
5	mmu-miR-5622-3p	CiCo_mm9_circ_006344	78704
5	mmu-miR-6342	CiCo_mm9_circ_006344	78704
5	mmu-miR-6345	CiCo_mm9_circ_006344	78704
5	mmu-miR-6346	CiCo_mm9_circ_006344	78704
5	mmu-miR-6369	CiCo_mm9_circ_001647	13112
5	mmu-miR-6373	CiCo_mm9_circ_006344	78704
5	mmu-miR-6379	CiCo_mm9_circ_006344	78704
5	mmu-miR-6410	CiCo_mm9_circ_006344	78704
5	mmu-miR-666-3p	CiCo_mm9_circ_006344	78704
5	mmu-miR-667-5p	CiCo_mm9_circ_005057	1530
5	mmu-miR-672-5p	CiCo_mm9_circ_006344	78704
5	mmu-miR-683	CiCo_mm9_circ_002179	5866
5	mmu-miR-683	CiCo_mm9_circ_002180	5772
5	mmu-miR-6909-5p	CiCo_mm9_circ_006344	78704
5	mmu-miR-6918-5p	CiCo_mm9_circ_000778	5745
5	mmu-miR-6933-5p	CiCo_mm9_circ_006344	78704
5	mmu-miR-6945-5p	CiCo_mm9_circ_005536	2249
5	mmu-miR-6945-5p	CiCo_mm9_circ_005537	2158
5	mmu-miR-6946-5p	CiCo_mm9_circ_006344	78704
5	mmu-miR-6952-5p	CiCo_mm9_circ_006344	78704
5	mmu-miR-6959-5p	CiCo_mm9_circ_006344	78704
5	mmu-miR-6963-3p	CiCo_mm9_circ_006344	78704
5	mmu-miR-6975-3p	CiCo_mm9_circ_006344	78704
5	mmu-miR-6984-5p	CiCo_mm9_circ_006344	78704
5	mmu-miR-7003-5p	CiCo_mm9_circ_006344	78704
5	mmu-miR-7011-5p	CiCo_mm9_circ_006344	78704
5	mmu-miR-7012-5p	CiCo_mm9_circ_001647	13112
5	mmu-miR-7013-3p	CiCo_mm9_circ_006344	78704
5	mmu-miR-7033-3p	CiCo_mm9_circ_006344	78704
5	mmu-miR-7035-3p	CiCo_mm9_circ_002984	839
5	mmu-miR-7035-3p	CiCo_mm9_circ_002985	1548
5	mmu-miR-7036b-3p	CiCo_mm9_circ_006344	78704
5	mmu-miR-7039-3p	CiCo_mm9_circ_006344	78704
5	mmu-miR-7042-3p	CiCo_mm9_circ_006344	78704
5	mmu-miR-7044-5p	CiCo_mm9_circ_004623	6232
5	mmu-miR-7055-5p	CiCo_mm9_circ_006344	78704
5	mmu-miR-7057-5p	CiCo_mm9_circ_006344	78704
5	mmu-miR-7063-3p	CiCo_mm9_circ_006344	78704
5	mmu-miR-7071-5p	CiCo_mm9_circ_006344	78704
5	mmu-miR-7077-5p	CiCo_mm9_circ_006344	78704
5	mmu-miR-7087-5p	CiCo_mm9_circ_006344	78704
5	mmu-miR-7089-3p	CiCo_mm9_circ_006344	78704
5	mmu-miR-713	CiCo_mm9_circ_006344	78704
5	mmu-miR-7220-5p	CiCo_mm9_circ_006344	78704
5	mmu-miR-7221-3p	CiCo_mm9_circ_006344	78704
5	mmu-miR-7224-3p	CiCo_mm9_circ_006344	78704
5	mmu-miR-7229-3p	CiCo_mm9_circ_006344	78704
5	mmu-miR-7235-3p	CiCo_mm9_circ_006344	78704
5	mmu-miR-7242-5p	CiCo_mm9_circ_006344	78704
5	mmu-miR-763	CiCo_mm9_circ_006344	78704
5	mmu-miR-764-3p	CiCo_mm9_circ_006344	78704
5	mmu-miR-7649-5p	CiCo_mm9_circ_006344	78704
5	mmu-miR-7656-3p	CiCo_mm9_circ_002454	2653
5	mmu-miR-7665-3p	CiCo_mm9_circ_006344	78704
5	mmu-miR-7667-3p	CiCo_mm9_circ_006344	78704
5	mmu-miR-7671-5p	CiCo_mm9_circ_006344	78704
5	mmu-miR-7687-5p	CiCo_mm9_circ_006344	78704
5	mmu-miR-770-3p	CiCo_mm9_circ_006344	78704
5	mmu-miR-882	CiCo_mm9_circ_006344	78704
4	mmu-let-7b-5p	CiCo_mm9_circ_006344	78704
4	mmu-let-7e-5p	CiCo_mm9_circ_006344	78704
4	mmu-miR-1188-5p	CiCo_mm9_circ_006344	78704
4	mmu-miR-1191b-5p	CiCo_mm9_circ_006344	78704
4	mmu-miR-1199-3p	CiCo_mm9_circ_006344	78704
4	mmu-miR-12186-3p	CiCo_mm9_circ_005364	210
4	mmu-miR-12191-3p	CiCo_mm9_circ_006344	78704
4	mmu-miR-12201-3p	CiCo_mm9_circ_003979	2414
4	mmu-miR-12201-5p	CiCo_mm9_circ_006344	78704
4	mmu-miR-12202-3p	CiCo_mm9_circ_006344	78704
4	mmu-miR-1231-5p	CiCo_mm9_circ_001647	13112
4	mmu-miR-1249-3p	CiCo_mm9_circ_006344	78704
4	mmu-miR-1249-5p	CiCo_mm9_circ_001647	13112
4	mmu-miR-124b-3p	CiCo_mm9_circ_006344	78704
4	mmu-miR-1258-5p	CiCo_mm9_circ_006344	78704
4	mmu-miR-125b-5p	CiCo_mm9_circ_006344	78704
4	mmu-miR-1306-5p	CiCo_mm9_circ_006344	78704
4	mmu-miR-135a-1-3p	CiCo_mm9_circ_006344	78704
4	mmu-miR-138-5p	CiCo_mm9_circ_006344	78704
4	mmu-miR-141-3p	CiCo_mm9_circ_006344	78704
4	mmu-miR-149-3p	CiCo_mm9_circ_001647	13112
4	mmu-miR-1668	CiCo_mm9_circ_006344	78704
4	mmu-miR-188-3p	CiCo_mm9_circ_006344	78704
4	mmu-miR-1895	CiCo_mm9_circ_006344	78704
4	mmu-miR-18b-3p	CiCo_mm9_circ_006344	78704
4	mmu-miR-18b-5p	CiCo_mm9_circ_006344	78704
4	mmu-miR-1903	CiCo_mm9_circ_001317	362
4	mmu-miR-1903	CiCo_mm9_circ_002896	3533
4	mmu-miR-1930-5p	CiCo_mm9_circ_006344	78704
4	mmu-miR-1946b	CiCo_mm9_circ_006344	78704
4	mmu-miR-1952	CiCo_mm9_circ_006344	78704
4	mmu-miR-1955-5p	CiCo_mm9_circ_006344	78704
4	mmu-miR-1962	CiCo_mm9_circ_003599	1727
4	mmu-miR-1962	CiCo_mm9_circ_005808	927
4	mmu-miR-1968-5p	CiCo_mm9_circ_004353	2337
4	mmu-miR-1968-5p	CiCo_mm9_circ_004358	1894
4	mmu-miR-1968-5p	CiCo_mm9_circ_004364	1896
4	mmu-miR-204-5p	CiCo_mm9_circ_006344	78704
4	mmu-miR-211-3p	CiCo_mm9_circ_006344	78704
4	mmu-miR-212-5p	CiCo_mm9_circ_006344	78704
4	mmu-miR-27a-3p	CiCo_mm9_circ_006344	78704
4	mmu-miR-292a-3p	CiCo_mm9_circ_006344	78704
4	mmu-miR-296-3p	CiCo_mm9_circ_006344	78704
4	mmu-miR-298-5p	CiCo_mm9_circ_001647	13112
4	mmu-miR-3057-5p	CiCo_mm9_circ_006344	78704
4	mmu-miR-3064-3p	CiCo_mm9_circ_006344	78704
4	mmu-miR-3064-5p	CiCo_mm9_circ_000047	1259
4	mmu-miR-3064-5p	CiCo_mm9_circ_006919	3355
4	mmu-miR-3072-5p	CiCo_mm9_circ_004980	2393
4	mmu-miR-3072-5p	CiCo_mm9_circ_004981	1752
4	mmu-miR-3073a-5p	CiCo_mm9_circ_006344	78704
4	mmu-miR-3074-5p	CiCo_mm9_circ_002179	5866
4	mmu-miR-3074-5p	CiCo_mm9_circ_002180	5772
4	mmu-miR-3078-3p	CiCo_mm9_circ_006344	78704
4	mmu-miR-3080-3p	CiCo_mm9_circ_006344	78704
4	mmu-miR-3084-3p	CiCo_mm9_circ_006344	78704
4	mmu-miR-3087-5p	CiCo_mm9_circ_001647	13112
4	mmu-miR-3090-5p	CiCo_mm9_circ_006344	78704
4	mmu-miR-3091-5p	CiCo_mm9_circ_006344	78704
4	mmu-miR-3093-5p	CiCo_mm9_circ_006344	78704
4	mmu-miR-3095-3p	CiCo_mm9_circ_006344	78704
4	mmu-miR-3098-3p	CiCo_mm9_circ_006344	78704
4	mmu-miR-31-5p	CiCo_mm9_circ_006344	78704
4	mmu-miR-3100-5p	CiCo_mm9_circ_006344	78704
4	mmu-miR-3104-5p	CiCo_mm9_circ_001647	13112
4	mmu-miR-3104-5p	CiCo_mm9_circ_005536	2249
4	mmu-miR-3104-5p	CiCo_mm9_circ_005537	2158
4	mmu-miR-320-3p	CiCo_mm9_circ_006344	78704
4	mmu-miR-323-5p	CiCo_mm9_circ_006344	78704
4	mmu-miR-326-3p	CiCo_mm9_circ_001647	13112
4	mmu-miR-342-5p	CiCo_mm9_circ_006344	78704
4	mmu-miR-344b-5p	CiCo_mm9_circ_006344	78704
4	mmu-miR-344d-3-5p	CiCo_mm9_circ_006344	78704
4	mmu-miR-344g-3p	CiCo_mm9_circ_001647	13112
4	mmu-miR-345-3p	CiCo_mm9_circ_006344	78704
4	mmu-miR-346-3p	CiCo_mm9_circ_005536	2249
4	mmu-miR-346-3p	CiCo_mm9_circ_005537	2158
4	mmu-miR-3552	CiCo_mm9_circ_006344	78704
4	mmu-miR-3569-3p	CiCo_mm9_circ_006344	78704
4	mmu-miR-362-3p	CiCo_mm9_circ_006344	78704
4	mmu-miR-378a-3p	CiCo_mm9_circ_000778	5745
4	mmu-miR-378a-5p	CiCo_mm9_circ_006344	78704
4	mmu-miR-378c	CiCo_mm9_circ_000778	5745
4	mmu-miR-412-3p	CiCo_mm9_circ_006344	78704
4	mmu-miR-466q	CiCo_mm9_circ_006344	78704
4	mmu-miR-483-3p	CiCo_mm9_circ_006344	78704
4	mmu-miR-486b-3p	CiCo_mm9_circ_006344	78704
4	mmu-miR-490-3p	CiCo_mm9_circ_006344	78704
4	mmu-miR-500-5p	CiCo_mm9_circ_006344	78704
4	mmu-miR-504-3p	CiCo_mm9_circ_004462	4501
4	mmu-miR-5104	CiCo_mm9_circ_006344	78704
4	mmu-miR-5104b-5p	CiCo_mm9_circ_006344	78704
4	mmu-miR-5110	CiCo_mm9_circ_001753	1346
4	mmu-miR-5110	CiCo_mm9_circ_004165	3002
4	mmu-miR-5110	CiCo_mm9_circ_005808	927
4	mmu-miR-5112	CiCo_mm9_circ_006344	78704
4	mmu-miR-5133	CiCo_mm9_circ_003113	2076
4	mmu-miR-5133	CiCo_mm9_circ_005057	1530
4	mmu-miR-532-3p	CiCo_mm9_circ_006344	78704
4	mmu-miR-540-3p	CiCo_mm9_circ_006344	78704
4	mmu-miR-5621-5p	CiCo_mm9_circ_006344	78704
4	mmu-miR-5626-5p	CiCo_mm9_circ_006344	78704
4	mmu-miR-5710	CiCo_mm9_circ_006344	78704
4	mmu-miR-6340	CiCo_mm9_circ_004623	6232
4	mmu-miR-6342	CiCo_mm9_circ_001647	13112
4	mmu-miR-6357	CiCo_mm9_circ_006344	78704
4	mmu-miR-6361	CiCo_mm9_circ_001647	13112
4	mmu-miR-6366	CiCo_mm9_circ_006344	78704
4	mmu-miR-6367	CiCo_mm9_circ_006344	78704
4	mmu-miR-6378	CiCo_mm9_circ_006344	78704
4	mmu-miR-6395	CiCo_mm9_circ_006344	78704
4	mmu-miR-6404	CiCo_mm9_circ_006344	78704
4	mmu-miR-6415	CiCo_mm9_circ_006344	78704
4	mmu-miR-6541	CiCo_mm9_circ_006344	78704
4	mmu-miR-665-3p	CiCo_mm9_circ_001647	13112
4	mmu-miR-669k-5p	CiCo_mm9_circ_006344	78704
4	mmu-miR-669n	CiCo_mm9_circ_006344	78704
4	mmu-miR-674-3p	CiCo_mm9_circ_006344	78704
4	mmu-miR-674-5p	CiCo_mm9_circ_006344	78704
4	mmu-miR-6769b-5p	CiCo_mm9_circ_000474	1285
4	mmu-miR-6769b-5p	CiCo_mm9_circ_000475	1599
4	mmu-miR-679-5p	CiCo_mm9_circ_006344	78704
4	mmu-miR-683	CiCo_mm9_circ_006344	78704
4	mmu-miR-6897-5p	CiCo_mm9_circ_006344	78704
4	mmu-miR-6907-5p	CiCo_mm9_circ_006344	78704
4	mmu-miR-691	CiCo_mm9_circ_006344	78704
4	mmu-miR-6914-5p	CiCo_mm9_circ_001647	13112
4	mmu-miR-6915-5p	CiCo_mm9_circ_006344	78704
4	mmu-miR-6918-3p	CiCo_mm9_circ_002984	839
4	mmu-miR-6918-3p	CiCo_mm9_circ_002985	1548
4	mmu-miR-693-5p	CiCo_mm9_circ_006344	78704
4	mmu-miR-6930-3p	CiCo_mm9_circ_006344	78704
4	mmu-miR-6931-5p	CiCo_mm9_circ_005808	927
4	mmu-miR-6934-3p	CiCo_mm9_circ_005818	612
4	mmu-miR-6936-5p	CiCo_mm9_circ_002454	2653
4	mmu-miR-6937-3p	CiCo_mm9_circ_006344	78704
4	mmu-miR-6938-3p	CiCo_mm9_circ_006344	78704
4	mmu-miR-6940-5p	CiCo_mm9_circ_006919	3355
4	mmu-miR-6953-5p	CiCo_mm9_circ_006919	3355
4	mmu-miR-6958-5p	CiCo_mm9_circ_001647	13112
4	mmu-miR-6958-5p	CiCo_mm9_circ_005451	2958
4	mmu-miR-6974-3p	CiCo_mm9_circ_006344	78704
4	mmu-miR-6977-5p	CiCo_mm9_circ_006344	78704
4	mmu-miR-698-5p	CiCo_mm9_circ_001647	13112
4	mmu-miR-6981-3p	CiCo_mm9_circ_006344	78704
4	mmu-miR-6981-5p	CiCo_mm9_circ_002179	5866
4	mmu-miR-6981-5p	CiCo_mm9_circ_002180	5772
4	mmu-miR-6982-5p	CiCo_mm9_circ_002454	2653
4	mmu-miR-6982-5p	CiCo_mm9_circ_005387	3784
4	mmu-miR-6994-5p	CiCo_mm9_circ_006344	78704
4	mmu-miR-6997-5p	CiCo_mm9_circ_000047	1259
4	mmu-miR-6999-3p	CiCo_mm9_circ_004853	2556
4	mmu-miR-7001-5p	CiCo_mm9_circ_001647	13112
4	mmu-miR-7008-3p	CiCo_mm9_circ_006344	78704
4	mmu-miR-7014-5p	CiCo_mm9_circ_006344	78704
4	mmu-miR-7016-5p	CiCo_mm9_circ_001647	13112
4	mmu-miR-7019-3p	CiCo_mm9_circ_006344	78704
4	mmu-miR-7027-5p	CiCo_mm9_circ_006344	78704
4	mmu-miR-7028-5p	CiCo_mm9_circ_003246	3349
4	mmu-miR-7030-5p	CiCo_mm9_circ_001647	13112
4	mmu-miR-7032-3p	CiCo_mm9_circ_006344	78704
4	mmu-miR-7033-5p	CiCo_mm9_circ_004968	1113
4	mmu-miR-7033-5p	CiCo_mm9_circ_005952	994
4	mmu-miR-7033-5p	CiCo_mm9_circ_006496	1928
4	mmu-miR-7035-5p	CiCo_mm9_circ_005808	927
4	mmu-miR-7038-3p	CiCo_mm9_circ_006344	78704
4	mmu-miR-7045-5p	CiCo_mm9_circ_006344	78704
4	mmu-miR-7047-5p	CiCo_mm9_circ_001647	13112
4	mmu-miR-7056-5p	CiCo_mm9_circ_000474	1285
4	mmu-miR-7056-5p	CiCo_mm9_circ_000475	1599
4	mmu-miR-7058-5p	CiCo_mm9_circ_004462	4501
4	mmu-miR-7061-3p	CiCo_mm9_circ_006344	78704
4	mmu-miR-7069-5p	CiCo_mm9_circ_003246	3349
4	mmu-miR-7078-5p	CiCo_mm9_circ_001647	13112
4	mmu-miR-708-5p	CiCo_mm9_circ_006344	78704
4	mmu-miR-7080-3p	CiCo_mm9_circ_006344	78704
4	mmu-miR-7081-5p	CiCo_mm9_circ_001647	13112
4	mmu-miR-7081-5p	CiCo_mm9_circ_001752	1438
4	mmu-miR-7081-5p	CiCo_mm9_circ_001753	1346
4	mmu-miR-7081-5p	CiCo_mm9_circ_004901	967
4	mmu-miR-7081-5p	CiCo_mm9_circ_004902	941
4	mmu-miR-7081-5p	CiCo_mm9_circ_004903	720
4	mmu-miR-7081-5p	CiCo_mm9_circ_005808	927
4	mmu-miR-7082-5p	CiCo_mm9_circ_006344	78704
4	mmu-miR-7084-3p	CiCo_mm9_circ_006344	78704
4	mmu-miR-7087-3p	CiCo_mm9_circ_001647	13112
4	mmu-miR-7087-3p	CiCo_mm9_circ_002930	1610
4	mmu-miR-7087-3p	CiCo_mm9_circ_002932	1546
4	mmu-miR-7094-3p	CiCo_mm9_circ_006344	78704
4	mmu-miR-7115-3p	CiCo_mm9_circ_006344	78704
4	mmu-miR-7115-5p	CiCo_mm9_circ_006344	78704
4	mmu-miR-717	CiCo_mm9_circ_006344	78704
4	mmu-miR-7221-3p	CiCo_mm9_circ_000778	5745
4	mmu-miR-7222-5p	CiCo_mm9_circ_006344	78704
4	mmu-miR-7226-3p	CiCo_mm9_circ_006344	78704
4	mmu-miR-7230-5p	CiCo_mm9_circ_006344	78704
4	mmu-miR-7235-5p	CiCo_mm9_circ_001647	13112
4	mmu-miR-7239-3p	CiCo_mm9_circ_002133	1153
4	mmu-miR-763	CiCo_mm9_circ_001647	13112
4	mmu-miR-7652-5p	CiCo_mm9_circ_006344	78704
4	mmu-miR-7662-5p	CiCo_mm9_circ_001647	13112
4	mmu-miR-7674-3p	CiCo_mm9_circ_006344	78704
4	mmu-miR-7677-5p	CiCo_mm9_circ_006344	78704
4	mmu-miR-7684-3p	CiCo_mm9_circ_006344	78704
4	mmu-miR-7686-5p	CiCo_mm9_circ_000359	3948
4	mmu-miR-7686-5p	CiCo_mm9_circ_006344	78704
4	mmu-miR-770-5p	CiCo_mm9_circ_006344	78704
4	mmu-miR-8092	CiCo_mm9_circ_002179	5866
4	mmu-miR-8092	CiCo_mm9_circ_002180	5772
4	mmu-miR-8100	CiCo_mm9_circ_002454	2653
4	mmu-miR-8100	CiCo_mm9_circ_004462	4501
4	mmu-miR-8104	CiCo_mm9_circ_006344	78704
4	mmu-miR-92a-2-5p	CiCo_mm9_circ_004623	6232
4	mmu-miR-93-3p	CiCo_mm9_circ_006344	78704
3	mmu-let-7a-5p	CiCo_mm9_circ_006344	78704
3	mmu-let-7g-3p	CiCo_mm9_circ_006344	78704
3	mmu-miR-103-1-5p	CiCo_mm9_circ_006512	551
3	mmu-miR-103-2-5p	CiCo_mm9_circ_001516	1221
3	mmu-miR-103-3p	CiCo_mm9_circ_006344	78704
3	mmu-miR-107-3p	CiCo_mm9_circ_006344	78704
3	mmu-miR-1195	CiCo_mm9_circ_006344	78704
3	mmu-miR-1198-3p	CiCo_mm9_circ_006344	78704
3	mmu-miR-1199-5p	CiCo_mm9_circ_006344	78704
3	mmu-miR-12180-3p	CiCo_mm9_circ_006344	78704
3	mmu-miR-12183-5p	CiCo_mm9_circ_000778	5745
3	mmu-miR-12184-5p	CiCo_mm9_circ_006344	78704
3	mmu-miR-12186-3p	CiCo_mm9_circ_000948	1747
3	mmu-miR-12186-3p	CiCo_mm9_circ_000949	1650
3	mmu-miR-12186-3p	CiCo_mm9_circ_001647	13112
3	mmu-miR-12186-3p	CiCo_mm9_circ_004965	1048
3	mmu-miR-12189-3p	CiCo_mm9_circ_001647	13112
3	mmu-miR-12193-5p	CiCo_mm9_circ_006344	78704
3	mmu-miR-122-5p	CiCo_mm9_circ_006344	78704
3	mmu-miR-12202-3p	CiCo_mm9_circ_001492	2236
3	mmu-miR-12205-5p	CiCo_mm9_circ_006344	78704
3	mmu-miR-1231-5p	CiCo_mm9_circ_002932	1546
3	mmu-miR-1249-5p	CiCo_mm9_circ_002932	1546
3	mmu-miR-125a-5p	CiCo_mm9_circ_000778	5745
3	mmu-miR-129-1-3p	CiCo_mm9_circ_006344	78704
3	mmu-miR-129-2-3p	CiCo_mm9_circ_006344	78704
3	mmu-miR-129b-3p	CiCo_mm9_circ_006344	78704
3	mmu-miR-130b-5p	CiCo_mm9_circ_006344	78704
3	mmu-miR-135a-2-3p	CiCo_mm9_circ_003246	3349
3	mmu-miR-138-1-3p	CiCo_mm9_circ_006344	78704
3	mmu-miR-138-5p	CiCo_mm9_circ_003107	3448
3	mmu-miR-138-5p	CiCo_mm9_circ_004901	967
3	mmu-miR-138-5p	CiCo_mm9_circ_004902	941
3	mmu-miR-145a-3p	CiCo_mm9_circ_006344	78704
3	mmu-miR-146a-3p	CiCo_mm9_circ_006344	78704
3	mmu-miR-149-5p	CiCo_mm9_circ_002548	3012
3	mmu-miR-150-5p	CiCo_mm9_circ_000619	5076
3	mmu-miR-150-5p	CiCo_mm9_circ_006344	78704
3	mmu-miR-152-3p	CiCo_mm9_circ_006344	78704
3	mmu-miR-15b-5p	CiCo_mm9_circ_006344	78704
3	mmu-miR-16-5p	CiCo_mm9_circ_006344	78704
3	mmu-miR-17-3p	CiCo_mm9_circ_001273	695
3	mmu-miR-181b-5p	CiCo_mm9_circ_006344	78704
3	mmu-miR-185-3p	CiCo_mm9_circ_003246	3349
3	mmu-miR-185-3p	CiCo_mm9_circ_006919	3355
3	mmu-miR-186-3p	CiCo_mm9_circ_006344	78704
3	mmu-miR-1896	CiCo_mm9_circ_006183	899
3	mmu-miR-1902	CiCo_mm9_circ_006344	78704
3	mmu-miR-1903	CiCo_mm9_circ_000778	5745
3	mmu-miR-1903	CiCo_mm9_circ_001086	1080
3	mmu-miR-1903	CiCo_mm9_circ_002513	481
3	mmu-miR-1903	CiCo_mm9_circ_005627	1976
3	mmu-miR-1904	CiCo_mm9_circ_000948	1747
3	mmu-miR-1906	CiCo_mm9_circ_001844	1196
3	mmu-miR-1906	CiCo_mm9_circ_002016	647
3	mmu-miR-1906	CiCo_mm9_circ_004383	708
3	mmu-miR-1907	CiCo_mm9_circ_001647	13112
3	mmu-miR-191-3p	CiCo_mm9_circ_006344	78704
3	mmu-miR-1911-5p	CiCo_mm9_circ_006344	78704
3	mmu-miR-1930-3p	CiCo_mm9_circ_006344	78704
3	mmu-miR-1930-5p	CiCo_mm9_circ_004853	2556
3	mmu-miR-1938	CiCo_mm9_circ_006344	78704
3	mmu-miR-193a-3p	CiCo_mm9_circ_006344	78704
3	mmu-miR-193b-5p	CiCo_mm9_circ_006344	78704
3	mmu-miR-194-2-3p	CiCo_mm9_circ_000375	1530
3	mmu-miR-1941-5p	CiCo_mm9_circ_005451	2958
3	mmu-miR-1943-3p	CiCo_mm9_circ_005613	1436
3	mmu-miR-1943-3p	CiCo_mm9_circ_005614	1523
3	mmu-miR-1943-3p	CiCo_mm9_circ_005616	1101
3	mmu-miR-1943-5p	CiCo_mm9_circ_006919	3355
3	mmu-miR-1960	CiCo_mm9_circ_006344	78704
3	mmu-miR-1962	CiCo_mm9_circ_003128	1455
3	mmu-miR-1962	CiCo_mm9_circ_003129	1643
3	mmu-miR-1962	CiCo_mm9_circ_003600	860
3	mmu-miR-1962	CiCo_mm9_circ_004388	1738
3	mmu-miR-1962	CiCo_mm9_circ_004389	780
3	mmu-miR-1962	CiCo_mm9_circ_004391	663
3	mmu-miR-1962	CiCo_mm9_circ_006919	3355
3	mmu-miR-1963	CiCo_mm9_circ_006344	78704
3	mmu-miR-1964-5p	CiCo_mm9_circ_000047	1259
3	mmu-miR-1964-5p	CiCo_mm9_circ_000048	523
3	mmu-miR-1966-5p	CiCo_mm9_circ_001647	13112
3	mmu-miR-1966-5p	CiCo_mm9_circ_002831	4672
3	mmu-miR-1968-3p	CiCo_mm9_circ_001647	13112
3	mmu-miR-1968-3p	CiCo_mm9_circ_004623	6232
3	mmu-miR-1968-5p	CiCo_mm9_circ_000948	1747
3	mmu-miR-1968-5p	CiCo_mm9_circ_000949	1650
3	mmu-miR-1968-5p	CiCo_mm9_circ_001647	13112
3	mmu-miR-1968-5p	CiCo_mm9_circ_002016	647
3	mmu-miR-1968-5p	CiCo_mm9_circ_002896	3533
3	mmu-miR-1968-5p	CiCo_mm9_circ_003599	1727
3	mmu-miR-1981-5p	CiCo_mm9_circ_006344	78704
3	mmu-miR-1982-3p	CiCo_mm9_circ_006344	78704
3	mmu-miR-207	CiCo_mm9_circ_004976	2067
3	mmu-miR-210-3p	CiCo_mm9_circ_006344	78704
3	mmu-miR-210-5p	CiCo_mm9_circ_000818	3050
3	mmu-miR-214-3p	CiCo_mm9_circ_001647	13112
3	mmu-miR-214-3p	CiCo_mm9_circ_004343	525
3	mmu-miR-216c-3p	CiCo_mm9_circ_006344	78704
3	mmu-miR-23b-5p	CiCo_mm9_circ_006344	78704
3	mmu-miR-25-5p	CiCo_mm9_circ_003723	1171
3	mmu-miR-25-5p	CiCo_mm9_circ_003724	1262
3	mmu-miR-25-5p	CiCo_mm9_circ_003725	648
3	mmu-miR-2861	CiCo_mm9_circ_003599	1727
3	mmu-miR-2861	CiCo_mm9_circ_003600	860
3	mmu-miR-2861	CiCo_mm9_circ_003603	524
3	mmu-miR-2861	CiCo_mm9_circ_003604	281
3	mmu-miR-2861	CiCo_mm9_circ_004976	2067
3	mmu-miR-2861	CiCo_mm9_circ_004979	1068
3	mmu-miR-28c	CiCo_mm9_circ_006344	78704
3	mmu-miR-297b-5p	CiCo_mm9_circ_006344	78704
3	mmu-miR-299a-3p	CiCo_mm9_circ_006344	78704
3	mmu-miR-3057-3p	CiCo_mm9_circ_004968	1113
3	mmu-miR-3057-5p	CiCo_mm9_circ_002025	1814
3	mmu-miR-3059-3p	CiCo_mm9_circ_006344	78704
3	mmu-miR-3061-5p	CiCo_mm9_circ_006344	78704
3	mmu-miR-3064-5p	CiCo_mm9_circ_002454	2653
3	mmu-miR-3064-5p	CiCo_mm9_circ_002896	3533
3	mmu-miR-3064-5p	CiCo_mm9_circ_002930	1610
3	mmu-miR-3064-5p	CiCo_mm9_circ_002932	1546
3	mmu-miR-3064-5p	CiCo_mm9_circ_004142	911
3	mmu-miR-3064-5p	CiCo_mm9_circ_004335	1228
3	mmu-miR-3064-5p	CiCo_mm9_circ_004336	864
3	mmu-miR-3064-5p	CiCo_mm9_circ_004337	990
3	mmu-miR-3064-5p	CiCo_mm9_circ_004462	4501
3	mmu-miR-3064-5p	CiCo_mm9_circ_005586	1148
3	mmu-miR-3065-3p	CiCo_mm9_circ_003087	1386
3	mmu-miR-3067-3p	CiCo_mm9_circ_006344	78704
3	mmu-miR-3070-5p	CiCo_mm9_circ_005536	2249
3	mmu-miR-3070-5p	CiCo_mm9_circ_005537	2158
3	mmu-miR-3073b-5p	CiCo_mm9_circ_006344	78704
3	mmu-miR-3074-5p	CiCo_mm9_circ_006344	78704
3	mmu-miR-3076-3p	CiCo_mm9_circ_006344	78704
3	mmu-miR-3078-3p	CiCo_mm9_circ_000948	1747
3	mmu-miR-3078-3p	CiCo_mm9_circ_000949	1650
3	mmu-miR-3078-5p	CiCo_mm9_circ_006344	78704
3	mmu-miR-3081-5p	CiCo_mm9_circ_006919	3355
3	mmu-miR-3083b-5p	CiCo_mm9_circ_002133	1153
3	mmu-miR-3083b-5p	CiCo_mm9_circ_003676	2960
3	mmu-miR-3083b-5p	CiCo_mm9_circ_005352	2038
3	mmu-miR-3083b-5p	CiCo_mm9_circ_005808	927
3	mmu-miR-3085-3p	CiCo_mm9_circ_000047	1259
3	mmu-miR-3085-5p	CiCo_mm9_circ_001647	13112
3	mmu-miR-3085-5p	CiCo_mm9_circ_005613	1436
3	mmu-miR-3085-5p	CiCo_mm9_circ_005614	1523
3	mmu-miR-3085-5p	CiCo_mm9_circ_005616	1101
3	mmu-miR-3089-3p	CiCo_mm9_circ_001647	13112
3	mmu-miR-3098-5p	CiCo_mm9_circ_006344	78704
3	mmu-miR-3099-5p	CiCo_mm9_circ_003559	713
3	mmu-miR-30b-3p	CiCo_mm9_circ_006344	78704
3	mmu-miR-3100-3p	CiCo_mm9_circ_006344	78704
3	mmu-miR-3102-3p.2-3p	CiCo_mm9_circ_006344	78704
3	mmu-miR-3106-5p	CiCo_mm9_circ_006344	78704
3	mmu-miR-3108-3p	CiCo_mm9_circ_006344	78704
3	mmu-miR-3113-5p	CiCo_mm9_circ_001048	1111
3	mmu-miR-3113-5p	CiCo_mm9_circ_001647	13112
3	mmu-miR-3154	CiCo_mm9_circ_006224	1175
3	mmu-miR-320-3p	CiCo_mm9_circ_005443	3101
3	mmu-miR-320-5p	CiCo_mm9_circ_003402	3283
3	mmu-miR-320-5p	CiCo_mm9_circ_004420	664
3	mmu-miR-320-5p	CiCo_mm9_circ_004654	760
3	mmu-miR-320-5p	CiCo_mm9_circ_004941	455
3	mmu-miR-320-5p	CiCo_mm9_circ_005627	1976
3	mmu-miR-324-3p	CiCo_mm9_circ_000818	3050
3	mmu-miR-324-5p	CiCo_mm9_circ_002454	2653
3	mmu-miR-326-5p	CiCo_mm9_circ_001268	970
3	mmu-miR-326-5p	CiCo_mm9_circ_005384	2334
3	mmu-miR-329-3p	CiCo_mm9_circ_006344	78704
3	mmu-miR-330-3p	CiCo_mm9_circ_006344	78704
3	mmu-miR-330-5p	CiCo_mm9_circ_002548	3012
3	mmu-miR-331-3p	CiCo_mm9_circ_002179	5866
3	mmu-miR-331-3p	CiCo_mm9_circ_002180	5772
3	mmu-miR-337-3p	CiCo_mm9_circ_003515	560
3	mmu-miR-337-3p	CiCo_mm9_circ_004853	2556
3	mmu-miR-344e-5p	CiCo_mm9_circ_006344	78704
3	mmu-miR-344g-3p	CiCo_mm9_circ_003694	592
3	mmu-miR-344g-3p	CiCo_mm9_circ_003695	718
3	mmu-miR-344h-5p	CiCo_mm9_circ_006344	78704
3	mmu-miR-3470b	CiCo_mm9_circ_001647	13112
3	mmu-miR-3470b	CiCo_mm9_circ_006344	78704
3	mmu-miR-3472	CiCo_mm9_circ_006344	78704
3	mmu-miR-3473b	CiCo_mm9_circ_003107	3448
3	mmu-miR-3473b	CiCo_mm9_circ_006706	1647
3	mmu-miR-3473e	CiCo_mm9_circ_003107	3448
3	mmu-miR-3473e	CiCo_mm9_circ_006706	1647
3	mmu-miR-3474	CiCo_mm9_circ_001647	13112
3	mmu-miR-3475-3p	CiCo_mm9_circ_006344	78704
3	mmu-miR-351-5p	CiCo_mm9_circ_000778	5745
3	mmu-miR-351-5p	CiCo_mm9_circ_004552	1221
3	mmu-miR-351-5p	CiCo_mm9_circ_005536	2249
3	mmu-miR-351-5p	CiCo_mm9_circ_005537	2158
3	mmu-miR-3547-5p	CiCo_mm9_circ_001487	1970
3	mmu-miR-3547-5p	CiCo_mm9_circ_005387	3784
3	mmu-miR-3547-5p	CiCo_mm9_circ_006933	2927
3	mmu-miR-3569-3p	CiCo_mm9_circ_002896	3533
3	mmu-miR-3620-5p	CiCo_mm9_circ_006344	78704
3	mmu-miR-365-1-5p	CiCo_mm9_circ_006344	78704
3	mmu-miR-370-3p	CiCo_mm9_circ_002548	3012
3	mmu-miR-370-3p	CiCo_mm9_circ_003902	2194
3	mmu-miR-370-3p	CiCo_mm9_circ_004364	1896
3	mmu-miR-377-5p	CiCo_mm9_circ_006344	78704
3	mmu-miR-383-5p	CiCo_mm9_circ_006344	78704
3	mmu-miR-3960	CiCo_mm9_circ_000834	398
3	mmu-miR-3961	CiCo_mm9_circ_006344	78704
3	mmu-miR-448-5p	CiCo_mm9_circ_006344	78704
3	mmu-miR-466o-3p	CiCo_mm9_circ_006344	78704
3	mmu-miR-468-3p	CiCo_mm9_circ_006344	78704
3	mmu-miR-483-5p	CiCo_mm9_circ_006344	78704
3	mmu-miR-485-5p	CiCo_mm9_circ_003599	1727
3	mmu-miR-485-5p	CiCo_mm9_circ_003676	2960
3	mmu-miR-485-5p	CiCo_mm9_circ_003732	667
3	mmu-miR-486a-3p	CiCo_mm9_circ_000948	1747
3	mmu-miR-486a-3p	CiCo_mm9_circ_000949	1650
3	mmu-miR-486a-3p	CiCo_mm9_circ_001268	970
3	mmu-miR-486b-3p	CiCo_mm9_circ_000948	1747
3	mmu-miR-486b-3p	CiCo_mm9_circ_000949	1650
3	mmu-miR-486b-3p	CiCo_mm9_circ_001268	970
3	mmu-miR-490-5p	CiCo_mm9_circ_006933	2927
3	mmu-miR-504-3p	CiCo_mm9_circ_000645	344
3	mmu-miR-5104	CiCo_mm9_circ_001647	13112
3	mmu-miR-5106	CiCo_mm9_circ_003732	667
3	mmu-miR-5107-3p	CiCo_mm9_circ_006344	78704
3	mmu-miR-5110	CiCo_mm9_circ_000150	1140
3	mmu-miR-5110	CiCo_mm9_circ_000474	1285
3	mmu-miR-5110	CiCo_mm9_circ_000475	1599
3	mmu-miR-5110	CiCo_mm9_circ_001752	1438
3	mmu-miR-5110	CiCo_mm9_circ_002179	5866
3	mmu-miR-5110	CiCo_mm9_circ_002180	5772
3	mmu-miR-5110	CiCo_mm9_circ_002932	1546
3	mmu-miR-5110	CiCo_mm9_circ_002984	839
3	mmu-miR-5110	CiCo_mm9_circ_002985	1548
3	mmu-miR-5110	CiCo_mm9_circ_004588	1223
3	mmu-miR-5110	CiCo_mm9_circ_004901	967
3	mmu-miR-5110	CiCo_mm9_circ_004902	941
3	mmu-miR-5110	CiCo_mm9_circ_004903	720
3	mmu-miR-5110	CiCo_mm9_circ_005190	513
3	mmu-miR-5113	CiCo_mm9_circ_001647	13112
3	mmu-miR-5113	CiCo_mm9_circ_004462	4501
3	mmu-miR-5114	CiCo_mm9_circ_003402	3283
3	mmu-miR-5114	CiCo_mm9_circ_005595	581
3	mmu-miR-5120	CiCo_mm9_circ_000818	3050
3	mmu-miR-5128	CiCo_mm9_circ_006344	78704
3	mmu-miR-5129-3p	CiCo_mm9_circ_006344	78704
3	mmu-miR-5130	CiCo_mm9_circ_006344	78704
3	mmu-miR-540-5p	CiCo_mm9_circ_006344	78704
3	mmu-miR-541-5p	CiCo_mm9_circ_006344	78704
3	mmu-miR-542-3p	CiCo_mm9_circ_006344	78704
3	mmu-miR-546	CiCo_mm9_circ_006344	78704
3	mmu-miR-5615-3p	CiCo_mm9_circ_006344	78704
3	mmu-miR-5617-3p	CiCo_mm9_circ_006344	78704
3	mmu-miR-5620-5p	CiCo_mm9_circ_001647	13112
3	mmu-miR-5621-3p	CiCo_mm9_circ_006344	78704
3	mmu-miR-5623-5p	CiCo_mm9_circ_000375	1530
3	mmu-miR-5625-5p	CiCo_mm9_circ_000647	1998
3	mmu-miR-615-3p	CiCo_mm9_circ_006344	78704
3	mmu-miR-615-5p	CiCo_mm9_circ_004980	2393
3	mmu-miR-6240	CiCo_mm9_circ_006344	78704
3	mmu-miR-6337	CiCo_mm9_circ_001487	1970
3	mmu-miR-6337	CiCo_mm9_circ_001647	13112
3	mmu-miR-6337	CiCo_mm9_circ_002831	4672
3	mmu-miR-6340	CiCo_mm9_circ_005101	1703
3	mmu-miR-6340	CiCo_mm9_circ_005102	1913
3	mmu-miR-6340	CiCo_mm9_circ_005583	1486
3	mmu-miR-6340	CiCo_mm9_circ_006344	78704
3	mmu-miR-6342	CiCo_mm9_circ_000156	452
3	mmu-miR-6342	CiCo_mm9_circ_002831	4672
3	mmu-miR-6357	CiCo_mm9_circ_002188	576
3	mmu-miR-6363	CiCo_mm9_circ_006344	78704
3	mmu-miR-6376	CiCo_mm9_circ_006344	78704
3	mmu-miR-6385	CiCo_mm9_circ_006344	78704
3	mmu-miR-6392-5p	CiCo_mm9_circ_006344	78704
3	mmu-miR-6393	CiCo_mm9_circ_006344	78704
3	mmu-miR-6396	CiCo_mm9_circ_006344	78704
3	mmu-miR-6397	CiCo_mm9_circ_006344	78704
3	mmu-miR-6400	CiCo_mm9_circ_003960	807
3	mmu-miR-6407	CiCo_mm9_circ_005879	1722
3	mmu-miR-6419	CiCo_mm9_circ_002831	4672
3	mmu-miR-652-5p	CiCo_mm9_circ_006344	78704
3	mmu-miR-6538	CiCo_mm9_circ_006344	78704
3	mmu-miR-665-3p	CiCo_mm9_circ_003246	3349
3	mmu-miR-665-5p	CiCo_mm9_circ_005536	2249
3	mmu-miR-665-5p	CiCo_mm9_circ_005537	2158
3	mmu-miR-666-3p	CiCo_mm9_circ_002561	1709
3	mmu-miR-666-3p	CiCo_mm9_circ_004353	2337
3	mmu-miR-666-3p	CiCo_mm9_circ_004358	1894
3	mmu-miR-666-3p	CiCo_mm9_circ_004364	1896
3	mmu-miR-666-3p	CiCo_mm9_circ_004976	2067
3	mmu-miR-666-5p	CiCo_mm9_circ_006344	78704
3	mmu-miR-667-3p	CiCo_mm9_circ_001647	13112
3	mmu-miR-667-5p	CiCo_mm9_circ_002930	1610
3	mmu-miR-667-5p	CiCo_mm9_circ_006509	1108
3	mmu-miR-668-3p	CiCo_mm9_circ_006344	78704
3	mmu-miR-669b-5p	CiCo_mm9_circ_006344	78704
3	mmu-miR-669h-5p	CiCo_mm9_circ_001647	13112
3	mmu-miR-669h-5p	CiCo_mm9_circ_006344	78704
3	mmu-miR-670-5p	CiCo_mm9_circ_004388	1738
3	mmu-miR-671-5p	CiCo_mm9_circ_005431	1409
3	mmu-miR-674-5p	CiCo_mm9_circ_001647	13112
3	mmu-miR-6769b-5p	CiCo_mm9_circ_001491	1400
3	mmu-miR-681	CiCo_mm9_circ_006344	78704
3	mmu-miR-687	CiCo_mm9_circ_006344	78704
3	mmu-miR-6896-3p	CiCo_mm9_circ_006344	78704
3	mmu-miR-6901-3p	CiCo_mm9_circ_006344	78704
3	mmu-miR-6901-5p	CiCo_mm9_circ_001647	13112
3	mmu-miR-6901-5p	CiCo_mm9_circ_004552	1221
3	mmu-miR-6903-3p	CiCo_mm9_circ_006344	78704
3	mmu-miR-6904-5p	CiCo_mm9_circ_001647	13112
3	mmu-miR-6905-5p	CiCo_mm9_circ_001647	13112
3	mmu-miR-6905-5p	CiCo_mm9_circ_002932	1546
3	mmu-miR-6907-5p	CiCo_mm9_circ_002548	3012
3	mmu-miR-6907-5p	CiCo_mm9_circ_004976	2067
3	mmu-miR-6908-3p	CiCo_mm9_circ_005978	1440
3	mmu-miR-6908-3p	CiCo_mm9_circ_006344	78704
3	mmu-miR-6908-5p	CiCo_mm9_circ_003676	2960
3	mmu-miR-6911-5p	CiCo_mm9_circ_001571	1024
3	mmu-miR-6911-5p	CiCo_mm9_circ_001647	13112
3	mmu-miR-6911-5p	CiCo_mm9_circ_002179	5866
3	mmu-miR-6911-5p	CiCo_mm9_circ_002180	5772
3	mmu-miR-6912-3p	CiCo_mm9_circ_006344	78704
3	mmu-miR-6913-3p	CiCo_mm9_circ_006344	78704
3	mmu-miR-6913-5p	CiCo_mm9_circ_006344	78704
3	mmu-miR-6914-5p	CiCo_mm9_circ_000778	5745
3	mmu-miR-6914-5p	CiCo_mm9_circ_003107	3448
3	mmu-miR-6914-5p	CiCo_mm9_circ_004073	1578
3	mmu-miR-6916-5p	CiCo_mm9_circ_004462	4501
3	mmu-miR-6916-5p	CiCo_mm9_circ_006042	463
3	mmu-miR-6918-5p	CiCo_mm9_circ_000779	920
3	mmu-miR-6918-5p	CiCo_mm9_circ_002454	2653
3	mmu-miR-6919-3p	CiCo_mm9_circ_000212	442
3	mmu-miR-6919-3p	CiCo_mm9_circ_000213	617
3	mmu-miR-6919-3p	CiCo_mm9_circ_000668	186
3	mmu-miR-6919-3p	CiCo_mm9_circ_001647	13112
3	mmu-miR-6919-3p	CiCo_mm9_circ_001848	730
3	mmu-miR-6919-3p	CiCo_mm9_circ_002548	3012
3	mmu-miR-6919-3p	CiCo_mm9_circ_004125	579
3	mmu-miR-6919-3p	CiCo_mm9_circ_004462	4501
3	mmu-miR-6919-3p	CiCo_mm9_circ_004941	455
3	mmu-miR-6919-3p	CiCo_mm9_circ_005880	2178
3	mmu-miR-6920-3p	CiCo_mm9_circ_000818	3050
3	mmu-miR-6922-5p	CiCo_mm9_circ_004623	6232
3	mmu-miR-6924-5p	CiCo_mm9_circ_005387	3784
3	mmu-miR-6924-5p	CiCo_mm9_circ_006344	78704
3	mmu-miR-6925-5p	CiCo_mm9_circ_004462	4501
3	mmu-miR-6925-5p	CiCo_mm9_circ_006577	985
3	mmu-miR-6925-5p	CiCo_mm9_circ_006578	2206
3	mmu-miR-6925-5p	CiCo_mm9_circ_006579	2821
3	mmu-miR-6925-5p	CiCo_mm9_circ_006580	3389
3	mmu-miR-6928-3p	CiCo_mm9_circ_006344	78704
3	mmu-miR-6929-5p	CiCo_mm9_circ_004980	2393
3	mmu-miR-6929-5p	CiCo_mm9_circ_004981	1752
3	mmu-miR-6930-5p	CiCo_mm9_circ_003246	3349
3	mmu-miR-6931-3p	CiCo_mm9_circ_006344	78704
3	mmu-miR-6931-5p	CiCo_mm9_circ_001061	740
3	mmu-miR-6931-5p	CiCo_mm9_circ_001062	933
3	mmu-miR-6931-5p	CiCo_mm9_circ_004623	6232
3	mmu-miR-6932-3p	CiCo_mm9_circ_006344	78704
3	mmu-miR-6937-5p	CiCo_mm9_circ_006344	78704
3	mmu-miR-6938-5p	CiCo_mm9_circ_006344	78704
3	mmu-miR-6940-5p	CiCo_mm9_circ_000778	5745
3	mmu-miR-6940-5p	CiCo_mm9_circ_002118	1011
3	mmu-miR-6940-5p	CiCo_mm9_circ_003107	3448
3	mmu-miR-6940-5p	CiCo_mm9_circ_004787	1481
3	mmu-miR-6940-5p	CiCo_mm9_circ_004788	1370
3	mmu-miR-6940-5p	CiCo_mm9_circ_006706	1647
3	mmu-miR-6941-5p	CiCo_mm9_circ_005536	2249
3	mmu-miR-6941-5p	CiCo_mm9_circ_005537	2158
3	mmu-miR-6942-5p	CiCo_mm9_circ_001752	1438
3	mmu-miR-6942-5p	CiCo_mm9_circ_001753	1346
3	mmu-miR-6942-5p	CiCo_mm9_circ_002454	2653
3	mmu-miR-6942-5p	CiCo_mm9_circ_004462	4501
3	mmu-miR-6942-5p	CiCo_mm9_circ_006324	1221
3	mmu-miR-6942-5p	CiCo_mm9_circ_006325	1516
3	mmu-miR-6950-5p	CiCo_mm9_circ_000778	5745
3	mmu-miR-6954-5p	CiCo_mm9_circ_000375	1530
3	mmu-miR-6954-5p	CiCo_mm9_circ_000675	1256
3	mmu-miR-6954-5p	CiCo_mm9_circ_000948	1747
3	mmu-miR-6954-5p	CiCo_mm9_circ_000949	1650
3	mmu-miR-6954-5p	CiCo_mm9_circ_001268	970
3	mmu-miR-6955-5p	CiCo_mm9_circ_004976	2067
3	mmu-miR-6957-5p	CiCo_mm9_circ_006344	78704
3	mmu-miR-696	CiCo_mm9_circ_006344	78704
3	mmu-miR-6961-3p	CiCo_mm9_circ_005240	1132
3	mmu-miR-6961-3p	CiCo_mm9_circ_005978	1440
3	mmu-miR-6962-5p	CiCo_mm9_circ_006344	78704
3	mmu-miR-6966-3p	CiCo_mm9_circ_000677	1603
3	mmu-miR-697	CiCo_mm9_circ_006344	78704
3	mmu-miR-6972-5p	CiCo_mm9_circ_000359	3948
3	mmu-miR-6973b-3p	CiCo_mm9_circ_006344	78704
3	mmu-miR-6975-3p	CiCo_mm9_circ_001048	1111
3	mmu-miR-6976-3p	CiCo_mm9_circ_006344	78704
3	mmu-miR-6978-5p	CiCo_mm9_circ_006705	930
3	mmu-miR-6978-5p	CiCo_mm9_circ_006706	1647
3	mmu-miR-6979-3p	CiCo_mm9_circ_003732	667
3	mmu-miR-6980-5p	CiCo_mm9_circ_004980	2393
3	mmu-miR-6980-5p	CiCo_mm9_circ_004981	1752
3	mmu-miR-6981-5p	CiCo_mm9_circ_001647	13112
3	mmu-miR-6981-5p	CiCo_mm9_circ_004462	4501
3	mmu-miR-6982-5p	CiCo_mm9_circ_000474	1285
3	mmu-miR-6982-5p	CiCo_mm9_circ_000475	1599
3	mmu-miR-6982-5p	CiCo_mm9_circ_002179	5866
3	mmu-miR-6982-5p	CiCo_mm9_circ_002180	5772
3	mmu-miR-6985-3p	CiCo_mm9_circ_006344	78704
3	mmu-miR-6985-5p	CiCo_mm9_circ_002896	3533
3	mmu-miR-6987-5p	CiCo_mm9_circ_002548	3012
3	mmu-miR-6987-5p	CiCo_mm9_circ_005536	2249
3	mmu-miR-6987-5p	CiCo_mm9_circ_005537	2158
3	mmu-miR-6989-3p	CiCo_mm9_circ_006344	78704
3	mmu-miR-6990-3p	CiCo_mm9_circ_001647	13112
3	mmu-miR-6990-5p	CiCo_mm9_circ_006344	78704
3	mmu-miR-6992-5p	CiCo_mm9_circ_003732	667
3	mmu-miR-6993-5p	CiCo_mm9_circ_004623	6232
3	mmu-miR-6995-3p	CiCo_mm9_circ_006344	78704
3	mmu-miR-6995-5p	CiCo_mm9_circ_006344	78704
3	mmu-miR-6998-3p	CiCo_mm9_circ_003128	1455
3	mmu-miR-6998-3p	CiCo_mm9_circ_003129	1643
3	mmu-miR-7001-3p	CiCo_mm9_circ_006344	78704
3	mmu-miR-7001-5p	CiCo_mm9_circ_002118	1011
3	mmu-miR-7001-5p	CiCo_mm9_circ_004073	1578
3	mmu-miR-7001-5p	CiCo_mm9_circ_004462	4501
3	mmu-miR-7006-3p	CiCo_mm9_circ_006344	78704
3	mmu-miR-7006-5p	CiCo_mm9_circ_003246	3349
3	mmu-miR-7010-3p	CiCo_mm9_circ_006344	78704
3	mmu-miR-7010-5p	CiCo_mm9_circ_006344	78704
3	mmu-miR-7011-3p	CiCo_mm9_circ_000229	557
3	mmu-miR-7011-5p	CiCo_mm9_circ_004588	1223
3	mmu-miR-7011-5p	CiCo_mm9_circ_004590	747
3	mmu-miR-7011-5p	CiCo_mm9_circ_004591	897
3	mmu-miR-7011-5p	CiCo_mm9_circ_005387	3784
3	mmu-miR-7015-3p	CiCo_mm9_circ_001730	777
3	mmu-miR-7016-3p	CiCo_mm9_circ_001031	993
3	mmu-miR-7016-5p	CiCo_mm9_circ_005384	2334
3	mmu-miR-7017-5p	CiCo_mm9_circ_006344	78704
3	mmu-miR-7018-3p	CiCo_mm9_circ_001647	13112
3	mmu-miR-7019-5p	CiCo_mm9_circ_004976	2067
3	mmu-miR-7019-5p	CiCo_mm9_circ_005765	1081
3	mmu-miR-7019-5p	CiCo_mm9_circ_006489	1520
3	mmu-miR-7020-5p	CiCo_mm9_circ_000601	748
3	mmu-miR-7020-5p	CiCo_mm9_circ_004588	1223
3	mmu-miR-7023-3p	CiCo_mm9_circ_001647	13112
3	mmu-miR-7023-5p	CiCo_mm9_circ_001647	13112
3	mmu-miR-7023-5p	CiCo_mm9_circ_005536	2249
3	mmu-miR-7023-5p	CiCo_mm9_circ_005537	2158
3	mmu-miR-7026-3p	CiCo_mm9_circ_006344	78704
3	mmu-miR-7026-5p	CiCo_mm9_circ_006344	78704
3	mmu-miR-7028-3p	CiCo_mm9_circ_004420	664
3	mmu-miR-7028-3p	CiCo_mm9_circ_005627	1976
3	mmu-miR-7028-5p	CiCo_mm9_circ_002179	5866
3	mmu-miR-7028-5p	CiCo_mm9_circ_002180	5772
3	mmu-miR-7028-5p	CiCo_mm9_circ_005764	779
3	mmu-miR-7028-5p	CiCo_mm9_circ_005765	1081
3	mmu-miR-7029-5p	CiCo_mm9_circ_003813	1893
3	mmu-miR-7029-5p	CiCo_mm9_circ_003928	789
3	mmu-miR-7030-5p	CiCo_mm9_circ_002179	5866
3	mmu-miR-7030-5p	CiCo_mm9_circ_002180	5772
3	mmu-miR-7030-5p	CiCo_mm9_circ_004165	3002
3	mmu-miR-7030-5p	CiCo_mm9_circ_005461	1104
3	mmu-miR-7033-5p	CiCo_mm9_circ_001647	13112
3	mmu-miR-7033-5p	CiCo_mm9_circ_001837	2039
3	mmu-miR-7033-5p	CiCo_mm9_circ_004976	2067
3	mmu-miR-7035-3p	CiCo_mm9_circ_001647	13112
3	mmu-miR-7035-3p	CiCo_mm9_circ_002454	2653
3	mmu-miR-7035-5p	CiCo_mm9_circ_000203	701
3	mmu-miR-7035-5p	CiCo_mm9_circ_000375	1530
3	mmu-miR-7035-5p	CiCo_mm9_circ_004388	1738
3	mmu-miR-7035-5p	CiCo_mm9_circ_004389	780
3	mmu-miR-7035-5p	CiCo_mm9_circ_004391	663
3	mmu-miR-7036a-3p	CiCo_mm9_circ_002896	3533
3	mmu-miR-7036a-5p	CiCo_mm9_circ_006344	78704
3	mmu-miR-7039-5p	CiCo_mm9_circ_006344	78704
3	mmu-miR-7044-5p	CiCo_mm9_circ_000047	1259
3	mmu-miR-7047-5p	CiCo_mm9_circ_005384	2334
3	mmu-miR-7048-3p	CiCo_mm9_circ_006344	78704
3	mmu-miR-7048-5p	CiCo_mm9_circ_003246	3349
3	mmu-miR-7048-5p	CiCo_mm9_circ_004353	2337
3	mmu-miR-7048-5p	CiCo_mm9_circ_004364	1896
3	mmu-miR-7048-5p	CiCo_mm9_circ_004366	968
3	mmu-miR-7048-5p	CiCo_mm9_circ_006919	3355
3	mmu-miR-7049-5p	CiCo_mm9_circ_003902	2194
3	mmu-miR-7049-5p	CiCo_mm9_circ_004462	4501
3	mmu-miR-705	CiCo_mm9_circ_004901	967
3	mmu-miR-705	CiCo_mm9_circ_004902	941
3	mmu-miR-705	CiCo_mm9_circ_004903	720
3	mmu-miR-7051-5p	CiCo_mm9_circ_004697	2247
3	mmu-miR-7051-5p	CiCo_mm9_circ_004698	2764
3	mmu-miR-7052-3p	CiCo_mm9_circ_005818	612
3	mmu-miR-7052-5p	CiCo_mm9_circ_006344	78704
3	mmu-miR-7054-5p	CiCo_mm9_circ_002495	2624
3	mmu-miR-7054-5p	CiCo_mm9_circ_005048	1560
3	mmu-miR-7054-5p	CiCo_mm9_circ_005663	2731
3	mmu-miR-7055-3p	CiCo_mm9_circ_006344	78704
3	mmu-miR-7056-5p	CiCo_mm9_circ_002454	2653
3	mmu-miR-7056-5p	CiCo_mm9_circ_002984	839
3	mmu-miR-7056-5p	CiCo_mm9_circ_002985	1548
3	mmu-miR-7056-5p	CiCo_mm9_circ_005808	927
3	mmu-miR-7058-3p	CiCo_mm9_circ_006118	387
3	mmu-miR-7058-5p	CiCo_mm9_circ_005536	2249
3	mmu-miR-7058-5p	CiCo_mm9_circ_005537	2158
3	mmu-miR-7062-5p	CiCo_mm9_circ_006277	1687
3	mmu-miR-7066-3p	CiCo_mm9_circ_006344	78704
3	mmu-miR-7066-5p	CiCo_mm9_circ_006344	78704
3	mmu-miR-7067-5p	CiCo_mm9_circ_001647	13112
3	mmu-miR-7067-5p	CiCo_mm9_circ_006626	801
3	mmu-miR-7068-3p	CiCo_mm9_circ_001647	13112
3	mmu-miR-7068-5p	CiCo_mm9_circ_001647	13112
3	mmu-miR-7068-5p	CiCo_mm9_circ_003599	1727
3	mmu-miR-7068-5p	CiCo_mm9_circ_003600	860
3	mmu-miR-7068-5p	CiCo_mm9_circ_006344	78704
3	mmu-miR-7069-3p	CiCo_mm9_circ_001647	13112
3	mmu-miR-7069-5p	CiCo_mm9_circ_004131	1116
3	mmu-miR-7069-5p	CiCo_mm9_circ_006919	3355
3	mmu-miR-7070-3p	CiCo_mm9_circ_006344	78704
3	mmu-miR-7070-5p	CiCo_mm9_circ_001647	13112
3	mmu-miR-7070-5p	CiCo_mm9_circ_004388	1738
3	mmu-miR-7070-5p	CiCo_mm9_circ_006344	78704
3	mmu-miR-7073-5p	CiCo_mm9_circ_006344	78704
3	mmu-miR-7074-5p	CiCo_mm9_circ_000375	1530
3	mmu-miR-7075-5p	CiCo_mm9_circ_001647	13112
3	mmu-miR-7076-5p	CiCo_mm9_circ_001647	13112
3	mmu-miR-7076-5p	CiCo_mm9_circ_004165	3002
3	mmu-miR-7076-5p	CiCo_mm9_circ_005461	1104
3	mmu-miR-7079-5p	CiCo_mm9_circ_005764	779
[truncated: 141,496 more rows]
