# Supplementary material for: Sequence and expression levels of circular RNAs in progenitor cell types during mouse corticogenesis
Source: Life Sci Alliance. 2019 Mar 29;2(2):e201900354. doi: 10.26508/lsa.201900354 (PMC6441494; doi:10.26508/lsa.201900354)
Supplement: Supplementary file 2 [file LSA-2019-00354_TableS1.docx]

**Table S1**. **Primer List**. (**A**) List of divergent primers for all the tested circRNAs in **Figure 1C**. (**B**) Primer used for cloning and sequencing in Figure 1B. (**C**) Primers for linear transcript used in RNase R efficacy test, **Figure S1A**. (**D**) List of divergent primers for intron validation, **Figure S1C**.

(**A**)

| CiCo_mm9_circ_ |  | Sequence | Expected size |
| --- | --- | --- | --- |
| 001074 | FWD | GATGTGAGCCTGACTGAACG | 147 |
| REV | CTGCTGCTGGTTCTTGCTC |
| 001268 | FWD | CAGCTTGGCATGTGGAAAT | 146 |
| REV | CAGAGAAGAGCCCCTGGAC |
| 001423 | FWD | GCCTTGTTCTTCTGGTGAGC | 154 |
| REV | CTCCTGAACAGAAGGCTTGAA |
| 001527 | FWD | CCCTGAAAATGCAGAGAGAA | 142 |
| REV | TCTTGTTGGGCACAAAGATG |
| 001902 | FWD | CAAGTGTGACAGGCGCATAA | 143 |
| REV | CACCTGGTGGTTGATCTTGA |
| 002029 | FWD | CCAACTACGCAGACCCCTAC | 148 |
| REV | TCTGCTGAACTGGGGTCTTT |
| 000203 | FWD | CGCGAGGGACTGACAGAGT | 146 |
| REV | AGGGTCCGTGCGAAGAAG |
| 002131 | FWD | GAACCCCAAGGCTCTGCT | 149 |
| REV | GAACAGTTGGTGACCACGAG |
| 002132 | FWD | CCTGCTGGACCTCTCAGG | 149 |
| REV | GGATCTCAGCCAGAGACATGA |
| 002204 | FWD | GGACAGTGAGGAGCTCAGG | 153 |
| REV | AGGCTCCGAAGAAAGTGCT |
| 002231 | FWD | AAGAGCAGGGCATCATCTCT | 149 |
| REV | TCTTTGGCAAGCTGTGGTC |
| 002232 | FWD | GGGATGCATCTCTTGATAACTG | 147 |
| REV | TCCTCCAGATCTCTGTGGAAT |
| 002259 | FWD | ATCGGAGTTTTGGACCAATC | 145 |
| REV | TTGCTCGACTCATAGCTGGA |
| 002390 | FWD | CAACATCTCCTCGGATGTCA | 145 |
| REV | AGGCCACTTTTGAGTTCTTGTC |
| 003161 | FWD | CTCACGGGGCTCTGTCAAG | 149 |
| REV | GGAAGCTCCCATCAGGAAAT |
| 003578 | FWD | AAACGCTGACATCGAGCTG | 156 |
| REV | GCGATCGGTTCTTAGCACTC |
| 003934 | FWD | CAGCAACCACCAGCTCCTAT | 145 |
| REV | GGCCTGTGATATCATTCTGCT |
| 003968 | FWD | GGCCCAAACCCTTAAAATTAC | 145 |
| REV | TTTGCATCTTGCTCCCTCAT |
| 004187 | FWD | CCTCTCCACCACTGTCAGC | 150 |
| REV | CATGTCCAGTTCCTCTGAAGAT |
| 004202 | FWD | GGAAGATGAGGACGAAGATGA | 143 |
| REV | TGTCACCTGAATTTCGTCTTTC |
| CiCo_mm9_circ_ |  | Primer sequence | Expected size |
| 004254 | FWD | TTACTGTGAAGTTTGCCAACAA | 144 |
| REV | TGAGGCTCCATGGTGCTAAT |
| 004860 | FWD | AACACCATCACTCGGCTAAAG | 147 |
| REV | TGTGCCCAGGATGTTACAGA |
| 004878 | FWD | ACGTTCCTGCCTGAGCTG | 153 |
| REV | CACAGGTGCCTTGGTAAGGT |
| 005387 | FWD | TTGGAGAAAATGCTTCCAGA | 148 |
| REV | CCAGGATTCAAGCCAGTGTC |
| 005420 | FWD | TCCCAGGAAGAATTACAAAGG | 171 |
| REV | TCTGAAGACTTCTGGGTCTGC |
| 005430 | FWD | GGCTGTCTGACTGGTGGAAC | 147 |
| REV | CTGTGGACCCAGTGGTGAC |
| 006088 | FWD | GACTGGCCAGGGGACTTC | 143 |
| REV | CGGTGGCACCAGAGTGAC |
| 006218 | FWD | ACCTCTGGGCAGAACAGC | 141 |
| REV | GTTCCAGATCAAATCCCTTGA |
| 006222 | FWD | GGGCCATGGTATCTCTGTGT | 147 |
| REV | CCAGGAATTAGCCAGGATTTG |
| 000669 | FWD | GCCTGTCTACATCAACATCATC | 151 |
| REV | GAAGGGAAGGACCAGGTAGC |
| 000859 | FWD | ATGAACCAGCTTTCCCTCCT | 145 |
| REV | TAGCTGACGAGCCCTCTCTC |
| cdr1as | FWD | CTCCAGTGTATCGGCGTTTT | 153 |
| REV | TCACGATTGTCTGGAAGACCT |
| 000202 | FWD | GCCATTCAGGCTCATCAATA | 156 |
| REV | GTCTCGGTCATTCCACGACT |
| 000239 | FWD | GCTACCCCAGCTCCAACAT | 147 |
| REV | GCTTAAGAGGGCTGTGCTGT |
| 005390 | FWD | ACAGCAGACAGCTCCAATCA | 150 |
| REV | TTGGAAAGATGGGTGTTGGT |
| 006087 | FWD | CCCTGAACGACTGTATGCAC | 149 |
| REV | GGCACGGAAATCCAAGCTAT |
| 002232 | FWD | TGTGGCCTGTGTATGAAGGA | 151 |
| REV | CTCCAGAGGCCAGTAAGTTCC |
| 003872 | FWD | TCCTTCTTCAGCAAACACAACA | 149 |
| REV | TGAGATTTCGAGCTTGTTTGG |
| 000720 | FWD | GCTTCAACTGGAATGGCAAG | 154 |
| REV | TCTGGGCCATGTCTGAATAA |
| 000721 | FWD | TGTGCCTTCATTGCACATT | 155 |
| REV | TCTGGGCCATGTCTGAATAA |
| circEzh2 | FWD | TTACACGCTTCCGCCAAC | 131 |
| REV | AAGCAGCGGAGGATACAGC |

(**B**)

| CiCo_mm9_circ_ |  | Primer sequence for cloning | Expected size |
| --- | --- | --- | --- |
| 000203 | FWD | ACGTCTCGAGAGGACCCTGCTTTCTCTGCTGTGATTC | 37,144 (701) |
| REV | ACGTGTCGACACCGTGCGAAGAAGGAAGCGGCCACTG |
| 000720 | FWD | ACTGCTCGAGATACTCAGGTTGATGGAGTCAGGGA | 32,985 (961) |
| REV | ACGTTCTAGACTTTGGCTGAGCAAGTTTACAGTTT |
| 000721 | FWD | ACTGCTCGAGATACTCAGGTTGATGGAGTCAGGGA | 27,052 (754) |
| REV | CAGTGTCGACCTTGATAAGCAGAACTTAGCCATTT |
| 003872 | FWD | ACTGCTCGAGCGCCATCATATAGGAGATCGTAGCC | 5,307 (611) |
| REV | CAGTGTCGACCAGTTTGTATACAGACTCGTGATGG |
| 004202 | FWD | ACTGCTCGAGAGGTGACAGAGTTAGTCCTCGATAATT | 4,131 (603) |
| REV | CAGTGTCGACACCTGAATTTCGTCTTTCATTAAGTAT |
| 004583 | FWD | ACGTCTCGAGAGCCAGGTCGCACTGCCTGCGTCACTA | 199 |
| REV | ACGTGTCGACACGAGGGACATGTTCCTTATCCTTTCG |
| 006087 | FWD | ACGTCTCGAGAGGCCTCAGTATGGTGGCAAGTACTGT | 6,529 (673) |
| REV | ACGTGTCGACACTTCAAAGACCAGCGTCTCATTCGTG |
| 006088 | FWD | ACGTCTCGAGAGGACATTTGCAAGTCACTCTGGTGCC | 17,979 (918) |
| REV | ACGTGTCGACACTTCAAAGACCAGCGTCTCATTCGTG |
| 006222 | FWD | ACGTCTCGAGAGGCAGGCTAACGAAGAATATCAAATC | 33,824 (490) |
| REV | ACGTGTCGACACCACTTGTCCATTGTGTGGGTTCTTA |
| 002131 | FWD | ACGTCTCGAGAGGCCCGCACCTCGTGGTCACCAACTG | 2,606 (257) |
| REV | ACGTGTCGACACCGTGCGGTTTTTTGACTGCAGCTCA |
| 004187 | FWD | ACGTCTCGAGAGAAAATCTTCAGAGGAACTGGACATG | 3,711 (331) |
| REV | ACGTGTCGACACCTTTCTCTTCCTCGGAATGGGCTCA |
| 005387 | FWD | ACGTACGCGTAGGAGGAAGAATATGGAAAAGACAATG | 17,031 (3,784) |
| REV | ACGTTCTAGAACCTGAAATTGGAAAGATGGGTGTTGG |
| 005390 | FWD | ACGTGAATTCAGAAAATGCTTCCAGACTGCTCACTTT | 8,903 (296) |
| REV | ACGTGTCGACACAGGCTACGATATTGACGTATCTGTT |
| 005431 | FWD | ACGTCTCGAGAGAACTTTGTGCGTCACCACTGGGTCC | 87,653 (1,409) |
| REV | ACGTGTCGACACTCATTGAGCAAAGGCATCGAGGTTC |
| 006631 | FWD | ACGTCTCGAGAGCCATGGAAACAAAGAAGTATTCTCG | 6,546 (375) |
| REV | ACGTGTCGACACTTGTCATTGACAAAGGAATACATCA |

(**C**)

| Transcript ID |  | Primer sequence | Expected size |
| --- | --- | --- | --- |
| circEzh2 | FWD | TTACACGCTTCCGCCAAC | 131 |
| REV | AAGCAGCGGAGGATACAGC |
| Ezh2LIN | FWD | GCGGGACTAGGGAGTGTTC | 154 |
| REV | TGTAAAACAGTTTCGTCTTCCA |
| GAPDH | FWD | AGGTCGGTGTGAACGGATT | 147 |
| REV | CGTGAGTGGAGTCATACTGGA |
| Transcript ID |  | Primer sequence | Expected size |
| ENSMUST00000045942 Emx1 | FWD | CTCACTCTTTCTTCAGCGCC | 170 |
| REV | CGAGAAGGCTGTGCGAATC |
| ENSMUST00000056403 H1fx | FWD | CGCACAAGAGCAAGAAGGC | 157 |
| REV | GGGCGGATAGGGATAGAGAC |
| ENSMUST00000038537 Wtip | FWD | GATGATTCTGCAGGCCCTTG | 164 |
| REV | CACAGGAGGCACATTTTGGT |
| ENSMUST00000052281 A19Rik | FWD | TATGAGCGTCGGACCTCTTC | 163 |
| REV | TCGGGTGCTTGAAGATCACT |
| ENSMUST00000154977 Ccdc120 | FWD | TAGGGAGCAGGCGAGGAG | 179 |
| REV | GCTGGGCAGACTTACAACAC |
| ENSMUST00000012161 Scarf2 | FWD | GGGGATGAGTGTGGGATAGC | 150 |
| REV | GTCAGGGCCCCAGAACTG |

(**D**)

| CiCo_mm9_circ_ |  | Primer sequence for cloning | Expected size |
| --- | --- | --- | --- |
| 002805 | FWD | ACTGGCTAGCAAGGCAAAATTGGTGTATGAAGAAG | 720 (167) |
| REV | CAGTCTCGAGTTTTCGATTTTTCTGATGCTGTAAC |
| 004996 | FWD | ACTGGCTAGCACGGACTCAGACATTGAACAAGGAG | 496 (186) |
| REV | CAGTCTCGAGTCATCGTCCCATTCAAAGCCTCCGC |
| 004228 | FWD | ACTGGCTAGCAGGAGCTCTGGTGGCCTGCTGCATA | 940 (547) |
| REV | CAGTCTCGAGAGGTGAAGCGGGCCTGAAGGTAGAG |
| 004227 | FWD | ACTGGCTAGCCATGTTCACTATGCTGTATCTGGTG | 883 (490) |
| REV | CAGTCTCGAGGGCGTGGCCCGAGAAGAAGGACTTC |
| 003247 | FWD | ACTGGCTAGCCCAGCTGCAGACTTTCTCAGAGGAG | 791 (126) |
| REV | CAGTCTCGAGGGATTGACAGCAGCCCCCGGTGCTC |
| 003141 | FWD | ACTGGCTAGCCCTTGGCGAGTGGCAGCCCCTTGAG | 563 (461) |
| REV | CAGTCTCGAGGGTTCCACCAGTTGGCTGAGGCACC |
